# Supplementary material for: Identification of Dry Bean Varieties Based on Multiple Attributes Using CatBoost Machine Learning Algorithm
Source: Hindawi journal article supplement (doi:10.1155/2023/2556066), 2023-04-21
Supplement: f1 [file 2556066.f1.zip]

Archive with 4 entries (3 files):
- DryBeanDataset/
- DryBeanDataset/Dry_Bean_Dataset.arff
- DryBeanDataset/Dry_Bean_Dataset.txt
- DryBeanDataset/Dry_Bean_Dataset.xlsx
