# Supplementary material for: Identification of Dry Bean Varieties Based on Multiple Attributes Using CatBoost Machine Learning Algorithm
Source: Hindawi journal article supplement (doi:10.1155/2023/2556066), 2023-04-21
Supplement: f1 [file 2556066.f1.zip › DryBeanDataset/Dry_Bean_Dataset.arff]

% Citation Request
% Murat KOKLU and ILKER ALI OZKAN
% KOKLU, M. and OZKAN, I.A., (2020), "Multiclass Classification of Dry Beans Using Computer Vision and Machine Learning Techniques." Computers and Electronics in Agriculture, 174, 105507. DOI: https://doi.org/10.1016/j.compag.2020.105507
% Citation Request

@RELATION Dry_Beans_Dataset
@ATTRIBUTE Area	INTEGER
@ATTRIBUTE Perimeter	REAL
@ATTRIBUTE MajorAxisLength	REAL
@ATTRIBUTE MinorAxisLength	REAL
@ATTRIBUTE AspectRation	REAL
@ATTRIBUTE Eccentricity	REAL
@ATTRIBUTE ConvexArea	INTEGER
@ATTRIBUTE EquivDiameter	REAL
@ATTRIBUTE Extent	REAL
@ATTRIBUTE Solidity	REAL
@ATTRIBUTE roundness	REAL
@ATTRIBUTE Compactness	REAL
@ATTRIBUTE ShapeFactor1	REAL
@ATTRIBUTE ShapeFactor2	REAL
@ATTRIBUTE ShapeFactor3	REAL
@ATTRIBUTE ShapeFactor4	REAL
@ATTRIBUTE Class	{SEKER, BARBUNYA, BOMBAY, CALI, HOROZ, SIRA, DERMASON}

@DATA
28395,610.2909999999998,208.17811670852728,173.88874704163598,1.1971914241160242,0.5498121871383472,28715,190.1410972745107,0.7639225181598063,0.9888559986069998,0.9580271262501276,0.9133577547957626,0.007331506135183212,0.00314728916733569,0.8342223882455564,0.9987238890131684,SEKER
28734,638.0179999999999,200.52479566364806,182.73441935102403,1.0973564606810586,0.41178525136724037,29172,191.2727504858446,0.7839681327076286,0.9849856026326614,0.8870336365528869,0.9538608422605129,0.0069786592769418825,0.003563623712100963,0.9098505063979352,0.9984303314497069,SEKER
29380,624.11,212.82612986020646,175.93114261271373,1.209712656324364,0.5627273167504117,29690,193.41090409881002,0.7781132475237036,0.9895587739979791,0.9478494730164112,0.9087742385103313,0.007243911840034257,0.003047733217213173,0.8258706165800325,0.9990661373632715,SEKER
30008,645.8839999999999,210.5579989609251,182.51651569530466,1.153638059321893,0.49861597640271654,30724,195.467061824781,0.7826812728221179,0.9766957427418305,0.9039363743173375,0.9283288347599437,0.0070167288376741235,0.003214562079390055,0.8617944254467547,0.99419884850682,SEKER
30140,620.1339999999999,201.84788216673786,190.27927878664835,1.0607980199097815,0.333679657773177,30417,195.89650297623436,0.7730980351921203,0.9908932504849262,0.9848770693509095,0.970515523241471,0.006697010025439212,0.0036649719644516834,0.9419003808526663,0.9991660589607774,SEKER
30279,634.927,212.5605564253862,181.5101815997528,1.1710668489886833,0.5204006602912636,30600,196.34770224027577,0.775688484693224,0.9895098039215686,0.9438517832505929,0.9237259515228944,0.007020065273799868,0.0031527787389953013,0.8532696335168767,0.9992357810603374,SEKER
30477,670.033,211.05015532184015,184.03905011294344,1.146768336352096,0.489477894457261,30970,196.98863318702823,0.7624015009380863,0.9840813690668389,0.8530798687748348,0.9333735523038642,0.006924899278860785,0.003242016245376514,0.8711861881403341,0.9990487356266151,SEKER
30519,629.7269999999999,212.9967550563458,182.73720376406496,1.16559053476242,0.5137595579635882,30847,197.12432033052752,0.7706818181818181,0.9893668752228741,0.9671092439901503,0.9254803918415593,0.006979152497013198,0.003158285146362523,0.8565139556832061,0.998344559636264,SEKER
30685,635.6809999999999,213.53414516451642,183.15714629597372,1.1658521083280848,0.5140808603472914,31044,197.65969601868375,0.7715614785013829,0.9884357685865224,0.9542398075022369,0.9256584976908387,0.006958909733241532,0.0031515495188116868,0.8568436543472606,0.9989529809282945,SEKER
30834,631.934,217.22781276440924,180.89746857382104,1.2008339004244408,0.5536422246843214,31120,198.13901211615044,0.7836828059473885,0.9908097686375321,0.9702782301205947,0.9121254299560562,0.007045074034001727,0.0030080398121198064,0.8319727999725202,0.9990611424380447,SEKER
30917,640.765,213.56008939309797,184.43987085903285,1.1578846178889468,0.5041023654121609,31280,198.40551152772198,0.7708052854649713,0.9883951406649616,0.9462581799326395,0.9290383427519497,0.006907529494876539,0.0031742202947999208,0.8631122423032895,0.9993843888746166,SEKER
31091,638.558,210.4862548708281,188.32684762014023,1.1176646215381034,0.4466219235668545,31458,198.96303849047175,0.7863773174494777,0.9883336512174964,0.9581728356299639,0.9452543046697849,0.00677000594612036,0.003333983668368092,0.8935057004967586,0.9986397105878477,SEKER
31107,640.594,214.64854850760176,184.96925258564633,1.1604552946345124,0.5073658752968685,31423,199.01422692379734,0.7610461418016343,0.989943671832734,0.9525817569197089,0.9271631618638654,0.006900329459851537,0.003145388256978018,0.8596315287174005,0.9975639589348673,SEKER
31158,642.626,216.48483620856237,183.64431215611992,1.1788267965768742,0.5295142509507343,31492,199.17730225820964,0.7987592288761279,0.9893941318430077,0.9481190040168371,0.9200519802981555,0.0069479695811208156,0.0030710517082392676,0.8464956464505574,0.9978717512215809,SEKER
31158,641.105,212.06697513850028,187.1929600683684,1.1328790092375651,0.469924156725518,31474,199.17730225820964,0.7813134732566012,0.9899599669568533,0.9526231013453076,0.939218858231592,0.006806180600118759,0.0032670098784518364,0.8821320636578552,0.9993488982933998,SEKER
31178,636.8879999999999,212.97592517558783,186.56208823218967,1.1415820180492635,0.4823522244603472,31520,199.24121693503304,0.7641104820723966,0.9891497461928934,0.9658995960258264,0.9355105126120183,0.006830968156250812,0.003227429112568851,0.8751799192076016,0.9990896583252051,SEKER
31202,644.4539999999998,215.64069469843406,184.47168424549938,1.1689636573787348,0.5178712232518864,31573,199.3178874933872,0.7791928878233942,0.9882494536471036,0.9440792434070276,0.924305534129939,0.00691111770714807,0.0031116465919126517,0.8543407204232316,0.998693253193524,SEKER
31203,639.7819999999999,215.06773695216492,184.87487594412093,1.1633151116605476,0.5109468292276196,31558,199.3210814599682,0.7629841549295775,0.9887508714113695,0.9579485417856513,0.926782809382055,0.006892533953535395,0.0031366824591191967,0.8589263757660944,0.9992020327325237,SEKER
31272,638.6659999999998,212.45031894918174,187.53593899411055,1.1328512288828736,0.46988349421480546,31593,199.54134168877889,0.7703221992314514,0.9898395214129713,0.9634250363807546,0.9392376658964174,0.0067936274926190116,0.0032612455172040633,0.8821673930385504,0.9993644152841227,SEKER
31335,635.011,216.79009228678302,184.16344029990532,1.1771613949747357,0.5275867100642196,31599,199.74223673093363,0.7742772424017791,0.9916453052311782,0.976510834463214,0.9213623861864616,0.006918464729113867,0.0030754693858982846,0.8489086466792102,0.9993024867310143,SEKER
31374,636.401,219.86539400833308,182.00886369813333,1.2079927842030036,0.5609945201182606,31604,199.86649913510016,0.7691968225948809,0.9927224401974434,0.973459862403212,0.9090402791060654,0.007007885319319599,0.0029518837956689047,0.8263542290372335,0.9982299458726142,SEKER
31530,638.857,213.7856543474257,188.06648234425188,1.1367557455352166,0.4755356415256237,31791,200.36277809388568,0.7689493707930933,0.9917901292818723,0.9707927387403043,0.9372133911673683,0.006780388656753115,0.0032269206969260905,0.8783689405834386,0.9984909399079052,SEKER
31573,674.103,217.30702605854574,185.44825067084633,1.1717933454343865,0.5212683904221279,32197,200.49935697134615,0.7569647566530808,0.9806193123582942,0.8731185069831213,0.9226547369772049,0.00688268539760383,0.003076766544671651,0.8512917636664752,0.9975380236874781,SEKER
31637,656.711,229.71925463641134,175.51044597535582,1.3088637166853716,0.6451908020300026,32045,200.7024650491028,0.7618233481024851,0.9872679045092838,0.9218421819917176,0.8736858621919399,0.007261094750969161,0.002609775195654626,0.7633269857940733,0.9990909956726727,SEKER
31675,657.431,236.75263210938377,171.2105591846093,1.382815599907615,0.6906782192904546,32009,200.82296327732612,0.7409356725146199,0.9895654347214846,0.9209289602324524,0.8482396224619057,0.007474431952940293,0.0023868887392210934,0.7195104571143162,0.9949502843943356,SEKER
31682,646.7209999999999,210.0456816267285,192.2484159476613,1.092574316367384,0.40284197357438384,32026,200.84515243415615,0.773184303006638,0.9892587272840817,0.9518938631075287,0.956197484655159,0.006629811300635329,0.003418781285782501,0.9143136296608532,0.9989555888720881,SEKER
31703,656.3050000000001,215.708906739895,187.27244969027828,1.1518453840735599,0.49626328085462607,32093,200.91170520091373,0.7771105010295127,0.987847817281027,0.9249085601436619,0.9314019909394656,0.006804053456767341,0.0031586108837336974,0.8675096687260003,0.9992370075612267,SEKER
31748,641.826,219.77651829981207,184.1151053119207,1.1936908594624824,0.5460726275575238,32020,201.0542440891312,0.7755899741046562,0.9915053091817614,0.9684821560162405,0.9148122176312733,0.0069225311295140505,0.0029906976165729755,0.8368813935274482,0.9989776699079396,SEKER
31768,650.9540000000001,220.95949485998423,183.29206807659332,1.2055049472607324,0.558465259169797,32173,201.11756227924664,0.7776744186046511,0.9874118049295993,0.942104629800205,0.910201041175846,0.006955410943716452,0.002944773314582015,0.828465935357594,0.99871978371057,SEKER
31811,642.092,223.98468285222035,180.91712284293047,1.2380513205855064,0.5895649687123592,32052,201.2536289301891,0.773877292852625,0.9924809684263073,0.9696001360667376,0.8985151411579843,0.0070411078825632755,0.002830885872170683,0.8073294588901526,0.9995153027265359,SEKER
31821,649.681,213.73564520069314,189.96920191597806,1.1251068228166101,0.4582865610047274,32168,201.28525915480648,0.7723543689320388,0.9892128823675702,0.9473781316557983,0.9417486679201496,0.0067168110744694745,0.003258989445688676,0.8868905535293763,0.9978466128675012,SEKER
31823,662.532,222.87268894663688,181.89469625782465,1.2252841535892196,0.5778581503170483,32274,201.29158460329901,0.7748478207937668,0.9860259032038173,0.9110396196180289,0.9031684660631294,0.007003509692569427,0.002874554587641028,0.8157132780908262,0.9994805535170057,SEKER
31837,656.4039999999999,224.91255418412965,180.43942186423214,1.2464712636541275,0.5969683535933227,32238,201.33585717833117,0.7852456590370955,0.9875612631056517,0.9285377475301468,0.8951739395280848,0.0070645021259581504,0.0027982792022322846,0.8013363820102314,0.9988427726963198,SEKER
31915,640.718,216.32036153815574,188.0653069421294,1.1502406533955827,0.4941383413794608,32184,201.5823406705625,0.7776559454191033,0.9916418095948297,0.9769466831984482,0.9318694700637616,0.006778015401477541,0.0031528452028966687,0.8683807092369159,0.9988467943887895,SEKER
31972,639.9739999999999,213.68748053289485,190.64494729334092,1.1208662152692614,0.4517054385526524,32246,201.7622727971526,0.7722705314009661,0.9915028220554487,0.9809683770672503,0.9441932316015749,0.006683581900816179,0.0032766689712814046,0.891500858602225,0.999253193290773,SEKER
31992,640.338,212.8873637073701,191.48725365959245,1.1117573605490247,0.4369684316743807,32258,201.82536885923764,0.7742122840133585,0.9917539835079671,0.980466376243067,0.9480382740643168,0.006654393714283886,0.003315826051746886,0.8987765690908487,0.9992214661757503,SEKER
31994,654.535,212.17139608383619,192.4225317877729,1.1026328055897567,0.42130237662827663,32391,201.83167738057568,0.7897413112164297,0.9877435089994134,0.9384532773909917,0.9512671411221948,0.0066315995525359816,0.003349716390830268,0.9049091737787939,0.9977825410876202,SEKER
32015,653.676,212.9299892784469,191.81013458378808,1.1101081271877897,0.43420694028297246,32375,201.8979049537073,0.7618809642797649,0.9888803088803089,0.9415389488677878,0.948189147230393,0.006650944534700824,0.0033162175205669305,0.8990626589255002,0.9980567645242616,SEKER
32026,654.237,230.97906741915182,176.93180830415815,1.3054694327324268,0.6428310650837523,32349,201.93258691872475,0.7794489875389408,0.9900151472997619,0.9402478733620752,0.8742462647157668,0.007212235915167421,0.0025988716324710694,0.7643065313694705,0.9977788139405914,SEKER
32038,645.085,224.48232110792435,181.94086680683577,1.2338202243823224,0.5857512998093428,32308,201.97041499740783,0.7705146705146705,0.9916429367339359,0.9674786148012576,0.8997163518293564,0.00700675201660292,0.0028321676925391263,0.8094895137491264,0.9987645334890841,SEKER
32044,652.651,216.14714684546735,188.97054032596685,1.1438139853578335,0.48544352010113206,32395,201.98932638011732,0.778069153069153,0.9891649945979318,0.9453542294066802,0.9344991563757626,0.006745323519082117,0.0031732055227639408,0.8732886732670119,0.9988797977373959,SEKER
32057,642.0819999999999,215.91828527398093,189.3033869113692,1.1405938836956608,0.4809714696790997,32301,202.03029496977703,0.7798049089007273,0.9924460543017244,0.9771286582334483,0.9356794155410169,0.0067354488964650756,0.003184597937041567,0.8754959686671788,0.9985853470619923,SEKER
32066,669.313,236.4366550480214,173.23089931478256,1.36486421292766,0.6805801720019645,32481,202.05865297353074,0.780878628482369,0.9872232997752532,0.8994895693843451,0.8545995244793649,0.007373437754881226,0.0024260534698442946,0.7303403472403568,0.9968154032055235,SEKER
32109,663.582,224.47235228915238,182.36449619998717,1.2308994182891186,0.5830809437929368,32567,202.19408631782815,0.7676253317076669,0.9859366843737526,0.9163205998319498,0.9007527397288257,0.006990948092097306,0.0028388222941241104,0.8113554981289857,0.9986970106726465,SEKER
32114,648.566,222.65750737399864,183.82903610067322,1.2112205563220229,0.5642361269313905,32393,202.20982849412889,0.7606708039224975,0.9913870280616183,0.9593915997137143,0.9081653292492684,0.006933347056548503,0.002909258918790806,0.8247642652504322,0.9989714321911527,SEKER
32167,654.893,217.96051701714924,188.2047159446817,1.158103376544579,0.5043817530986666,32521,202.37662027886515,0.760593019956493,0.9891147258694382,0.9424964570592285,0.9285012856844254,0.006775904405668829,0.003106540864422383,0.8621146375176311,0.9984178726776743,SEKER
32213,658.216,221.4811143381682,185.2954323699252,1.195286421826101,0.5477843665607328,32585,202.5212716100553,0.7629073512694202,0.9885837041583551,0.9343383323575635,0.9143952170153701,0.006875519645427877,0.002964975252706566,0.8361186129005859,0.999401225036144,SEKER
32218,653.5949999999999,222.75607138109643,184.4046839490122,1.207974041715168,0.5609755664601539,32566,202.53698835589876,0.7544315653904695,0.9893140084750968,0.9477439021557724,0.9092321798465983,0.0069140254324010315,0.002914807830169736,0.826703156868597,0.9986359537012478,SEKER
32233,665.4929999999999,221.23368370102665,185.5923728724366,1.1920408165323013,0.5442895095369215,32710,202.5841312774732,0.7752044252044252,0.9854173035768878,0.9145840197365749,0.9157020209962408,0.006863577194211728,0.002976781623782729,0.8385101912566,0.9995383730561735,SEKER
32251,644.0509999999999,220.9809627768115,186.02778350127642,1.1878922525317046,0.539747142543915,32514,202.64068830630666,0.764060649135276,0.9919111767238727,0.9770404216446091,0.9170051834327995,0.006851910414461924,0.002988674382918363,0.8408985064426222,0.9988968209686725,SEKER
32258,654.808,220.80403007890376,186.277755809551,1.1853483477901257,0.5369189075061798,32612,202.6626784439278,0.7758056758056758,0.9891450999632038,0.9454081638315681,0.9178395809691825,0.0068449386223232616,0.0029965149595458053,0.8424294963936846,0.9985724116799217,SEKER
32262,652.4190000000001,222.69865627134513,184.5129928925483,1.2069537910592256,0.5599415175975334,32563,202.67524316562645,0.7813135716361522,0.9907563799404232,0.9524626416520814,0.9100874094124694,0.006902816200835197,0.002921046678822555,0.8282590927710997,0.9996704519993536,SEKER
32279,646.5559999999999,218.1816037965039,188.55314177232728,1.157135870268087,0.5031437256875972,32623,202.7286345450645,0.7901835985312118,0.9894552922784539,0.9703259436875631,0.9291738213371451,0.006759242969004737,0.0031078903101509118,0.8633639902582727,0.9990294422256346,SEKER
32323,649.59,217.3714573797691,189.59131904829272,1.1465264257399899,0.48914996706203917,32615,202.86675874690425,0.7848436285936286,0.991047064234248,0.9625933676235022,0.9332722943126625,0.006724977798464533,0.0031470533899704547,0.8709971753316212,0.9986212782625908,SEKER
32338,653.6020000000001,221.41134134396788,186.1362729792155,1.1895120590960326,0.5415309049908621,32672,202.91382505301527,0.7824908655358482,0.9897771792360431,0.9512535177689841,0.9164563288462434,0.006846785247818909,0.0029792954120347456,0.8398922026823339,0.9990619034313655,SEKER
32355,657.166,221.2796210000571,186.36040993884194,1.1873746203535107,0.5391743277590498,32720,202.96715367247526,0.7837936046511628,0.9888447432762836,0.9414583159721267,0.9172428656338981,0.006839116705302337,0.002986188010143479,0.8413344745562853,0.9989792023165898,SEKER
32368,675.3849999999999,221.65806493745845,186.17622928517986,1.1905819866935239,0.5427019393429459,32806,203.00792492902275,0.7590994371482176,0.9866487837590685,0.8917085023385342,0.9158607650315007,0.006848061818384159,0.0029721125583393915,0.838800940924086,0.9986612906857952,SEKER
32376,643.009,219.1300137300374,188.30042739205237,1.163725525029192,0.511456520670891,32608,203.03301086361702,0.7843023255813953,0.9928851815505397,0.9840087314607846,0.9265413140244153,0.006768285573574172,0.00307692983967631,0.8584788065940901,0.9990336999301419,SEKER
32433,653.76,219.83669711195967,188.00923682406014,1.1692866841307579,0.5182614078472965,32775,203.21165851002627,0.7693201764789601,0.9895652173913043,0.9535869437249885,0.9243755077275997,0.006778179542810091,0.003052717038448007,0.8544700792866577,0.9991204856980419,SEKER
32465,653.85,225.20244941772523,183.69209456068597,1.2259779058881903,0.5785098675215974,32767,203.31188312498375,0.7650344047506834,0.9907834101382489,0.9542650434534424,0.9027960559516964,0.006936776510633767,0.0028424712305333013,0.8150407186419387,0.9992219134542498,SEKER
32514,649.012,221.4454898972538,187.1344231774471,1.1833498409176797,0.534673643692279,32843,203.46525638919064,0.7849830999517141,0.9899826447035898,0.9700068736506543,0.9188051492202184,0.006810773509788208,0.002994124690715943,0.844202902233588,0.9989873700603598,SEKER
32518,651.651,221.26278537288943,187.2561106033458,1.1816051538183343,0.532696426660149,32811,203.47777155182828,0.7589152352501867,0.9910700679650117,0.9622846511114481,0.9196204016365046,0.006804317158893211,0.0030019171437902117,0.845701683106086,0.999285467350991,SEKER
32518,655.131,220.82119919338587,187.66558650582684,1.1766739086525573,0.5270196045494587,32842,203.47777155182828,0.7940321832344395,0.9901345837646915,0.9520886553575951,0.9214594083135608,0.006790737412921639,0.0030199623917194977,0.8490874411695776,0.999099038188805,SEKER
32525,663.9139999999999,225.07785556031743,184.2147341738576,1.221823306206843,0.5745792538814934,33000,203.49967123440558,0.7690579778681548,0.9856060606060606,0.9272642490958107,0.9041301318950534,0.006920149287019752,0.0028524562955168967,0.8174512954005669,0.9987810444093874,SEKER
32578,657.571,227.03757399657496,182.84230572264613,1.2417124860641866,0.5928139977174696,32901,203.66540670516957,0.7819220430107527,0.9901826692197806,0.9467797909622935,0.897055950343453,0.006969045797672508,0.0027837562587593257,0.8047093780465955,0.9992176823734034,SEKER
32581,649.583,224.42417789758497,184.92347131983024,1.213605694808947,0.5666030911163334,32851,203.67478392529677,0.7720616113744075,0.9917810721134821,0.9702976345800158,0.9075438566081899,0.0068881918264505375,0.002882408175749079,0.823635851667267,0.9995691600322125,SEKER
32615,664.7889999999999,218.146746288941,191.00227698353,1.1421159461243053,0.48309517204946983,33016,203.78102892943036,0.8085628579220071,0.9878543736370244,0.9273839969932451,0.9341465430775536,0.006688540435043415,0.0031417466709294196,0.8726297639437437,0.9966443684628379,SEKER
32622,657.009,235.2708697635185,177.15818953259333,1.3280270609236142,0.6580242878670918,32902,203.8028960254257,0.7793119923554707,0.9914898790347091,0.9496811325304296,0.8662478964364662,0.0072120308308355864,0.002504990650959533,0.7503854180806028,0.9965321413335201,SEKER
32698,653.0489999999999,225.0141906394872,185.143724263941,1.215348732634906,0.5683178518575858,32994,204.04015936513662,0.7676848308407485,0.9910286718797358,0.9634729275144157,0.9067879620625585,0.006881588801745893,0.002870063235327997,0.8222644081415681,0.9993380063256457,SEKER
32705,654.454,223.87586750160165,186.14992979684183,1.20266425964239,0.5555438328484512,33021,204.0619986929548,0.7794699461366128,0.9904303322128343,0.9595459232064728,0.911496182997459,0.006845310120825612,0.002914689579648394,0.8308252916189376,0.9992038842370623,SEKER
32713,660.043,215.4163207859024,193.48646209699407,1.113340532723757,0.4395915601284934,33020,204.08695506308428,0.7995160817284191,0.990702604482132,0.9435953206896729,0.9474071152943043,0.00658503716522185,0.0032725369697307635,0.8975802421102751,0.9993124649133724,SEKER
32729,656.6790000000001,214.2657206920077,194.79382504459102,1.0999615652239454,0.4165284657127013,33066,204.13685865036018,0.769153036285016,0.9898082622633521,0.9537539372263117,0.9527275664584394,0.006546662613951166,0.003327167369712744,0.9076898158898203,0.9984239106240014,SEKER
32774,660.6139999999999,222.8700513011593,187.47924765315082,1.1887718459030934,0.540717402508646,33120,204.27714712896844,0.7901538164810261,0.9895531400966183,0.9437213211191547,0.916575133968688,0.006800209046840767,0.0029605630209838547,0.8401099762097184,0.9986990871804309,SEKER
32775,649.807,220.0250994629802,189.80940378102122,1.1591896664762624,0.5057644876101894,33062,204.28026355645557,0.7726308345120226,0.9913193394229024,0.9754023408288142,0.928440728148955,0.006713199068283149,0.003076989557712224,0.8620021856857618,0.9992240261268875,SEKER
32795,651.03,225.21025208572854,185.60023120276543,1.2134157949387991,0.5664155110218729,33091,204.34258212518913,0.7759926174814253,0.9910549696292044,0.9723340531397822,0.9073413853619953,0.006867213053384008,0.0028710659269699647,0.8232683895906248,0.998966867403093,SEKER
32796,654.824,223.14536868852807,187.41926211421313,1.1906213169943198,0.5427448780805344,33111,204.34569755474274,0.8008204527140869,0.9904865452568633,0.9611287424729658,0.9157514617297463,0.006804042221262595,0.0029515982546434874,0.8386007396601671,0.9984559170865988,SEKER
32799,653.7289999999999,219.9055494139476,190.11233960212837,1.1567137087164945,0.5026015933646472,33087,204.3550435584319,0.7461779961779962,0.9912956750385348,0.9644394455020094,0.9292855232759788,0.0067046418919463275,0.0030842674851224504,0.8635715837703097,0.9989050894051319,SEKER
32829,658.101,221.59949999341745,189.00262754141565,1.1724678269081679,0.5220712625529795,33154,204.44848009733568,0.7897851661173527,0.990197261265609,0.9525382332252736,0.9226035261966239,0.006750114228073272,0.0030168333857138923,0.8511972665504445,0.9980014093825723,SEKER
32836,669.1899999999999,218.40600376102276,191.75877277464323,1.1389622524216694,0.4786748961698618,33225,204.47027581270538,0.802914710485133,0.9882919488337095,0.921427619698948,0.9361934758736501,0.006651419288616846,0.0031517846019845875,0.8764582242683863,0.998252833266218,SEKER
32849,664.105,230.7223075775402,181.7436855016809,1.2694928406489607,0.6160383778822545,33245,204.51074740708705,0.7465681818181819,0.9880884343510302,0.9359626473375842,0.8863934725442876,0.007023723936118,0.002674566454109165,0.7856933881691207,0.9974321312259234,SEKER
32870,655.5120000000001,220.35816291977068,190.02065976690054,1.159653709181335,0.50635283368871,33198,204.57610768475578,0.781242572610163,0.990119886740165,0.9612763890251181,0.9283799836325514,0.006703929507750857,0.0030719367875349387,0.8618893940095764,0.9994932326672583,SEKER
32885,659.728,227.06740366374652,184.55969324643877,1.2303195766615633,0.5825470945127489,33225,204.62278081537212,0.7856699159021406,0.9897667419112114,0.9494626319364751,0.9011543599555505,0.00690489291968212,0.0028088817971270896,0.812079180466898,0.9991169135277033,SEKER
32920,671.612,219.09313383325087,191.46221248065567,1.1443152724216372,0.48613262924648254,33376,204.73164340834455,0.7779747134585844,0.9863374880153404,0.9171340044360379,0.9344502943855982,0.006655319982784048,0.00313021035884333,0.8731973526773313,0.999213066506813,SEKER
32925,656.646,225.12817021691257,186.46152827800609,1.2073706157833062,0.560364526908099,33252,204.7471904823244,0.7686830247706208,0.9901660050523277,0.9595620011896921,0.909469438165153,0.006837605777279045,0.00288560086194828,0.8271346589564391,0.9986580825199508,SEKER
32934,668.1969999999999,221.40873083037212,189.6018110515005,1.1677564133089007,0.5164075045016255,33401,204.77517224094294,0.7767086458185934,0.9860183826831532,0.9269265082081329,0.9248739716494168,0.00672280108187199,0.0030343121339751196,0.8553918634345662,0.9988893344179661,SEKER
32947,668.2310000000001,209.69329272252926,200.2495993126508,1.0471596120156725,0.29672086108135076,33336,204.81558358774706,0.7653193960511033,0.988330933525318,0.9271980328421906,0.9767388404681284,0.006364564079355609,0.0035732405847105544,0.9540187624790241,0.9990099171732069,SEKER
32951,688.2599999999999,226.64904622747102,185.5215754596959,1.2216856485067418,0.5744478680874898,33524,204.8280162442832,0.7708016561790919,0.9829077675695025,0.8741247214764792,0.9037232657873722,0.0068783662476850785,0.0028301334321693835,0.8167157411253935,0.9977698998424405,SEKER
32988,676.797,224.75170993516784,187.17729445701804,1.2007423795025423,0.5535467409348023,33461,204.94298256276926,0.7666992051317808,0.9858641403424883,0.9050008768446041,0.9118639525451769,0.006813135380598031,0.002905674567503444,0.8314958679513128,0.9984123270303908,SEKER
33006,669.769,223.52774913974577,188.2429412080096,1.187442927237023,0.5392499943264328,33458,204.99888881047326,0.7570183486238532,0.9864905254348736,0.9245974137749079,0.9171071135437033,0.0067723368217822745,0.0029552794956776616,0.8410854577124632,0.9987409779625789,SEKER
33010,665.85,224.97125920643225,186.8900914943187,1.2037623686072794,0.5566774242305662,33374,205.01131035069193,0.7915877317090717,0.989093306166477,0.9356266427048878,0.9112777830992839,0.006815245659086103,0.00289910808350292,0.8304271979703454,0.999637010784689,SEKER
33013,652.684,223.78185388039773,188.02914232970517,1.1901445228527445,0.5422238229570202,33289,205.0206260119745,0.7897846889952153,0.9917089729340022,0.9738429464115214,0.9161628722655487,0.006778597942640709,0.0029458483762575725,0.8393544085178604,0.9989530520298365,SEKER
33019,655.7030000000001,224.45021141449706,187.50262716286304,1.1970510216880412,0.5496633180022981,33340,205.03925606480902,0.7643287037037036,0.9903719256148771,0.9650713855311085,0.913517767582578,0.00679760778383649,0.002920141254304041,0.8345147116890572,0.9989566882410872,SEKER
33051,663.071,218.95137138102254,192.47394174678976,1.137563710671366,0.47668967548711777,33423,205.13858777188133,0.7779268464906087,0.9888699398617719,0.9446575501990478,0.936913920556798,0.0066246519433912,0.003148774756485534,0.87780769453311,0.9985621782489619,SEKER
33058,655.511,224.44587881023983,187.8781611897244,1.1946352752707026,0.5470872834381975,33320,205.16031017196042,0.7992746615087041,0.9921368547418967,0.9667773600396955,0.9140747482622098,0.006789457281451988,0.002923759654856159,0.8355326454106222,0.9981567718477768,SEKER
33062,667.966,222.03914355777496,189.78134116275433,1.1699735189844438,0.5190889903649489,33439,205.17272193942824,0.7786622703721149,0.9887257394060828,0.9311727781737043,0.9240385215503317,0.006715841254545247,0.003020233295625227,0.8538471893089232,0.9989786007507375,SEKER
33078,659.4559999999999,235.560077511721,178.9312327601165,1.3164838462132755,0.6503915309408315,33333,205.22236150271175,0.7877214707563346,0.992349923499235,0.9558229606771169,0.8712102817698397,0.007121351880758239,0.0025306621944067853,0.7590073550614836,0.9992209220955074,SEKER
33078,652.2139999999999,221.3869025189035,190.35481212557195,1.1630223583360766,0.5105826184494583,33327,205.22236150271175,0.7724173360732299,0.9925285804302818,0.9771671827742581,0.9269851069224319,0.0066928744941926206,0.0030484808478703335,0.8593013884559927,0.9993867273235536,SEKER
33089,663.915,217.33582212672766,194.20704885110243,1.1190933769523368,0.4489030194588282,33466,205.25648173868174,0.7744102228047182,0.988734835355286,0.9433406398205416,0.9444208494032682,0.006568219714307705,0.0032232181461730154,0.8919307407875906,0.9981537847155841,SEKER
33090,653.809,228.40667503614446,184.6885547881269,1.2367126663488737,0.5883652823668539,33352,205.2595832970693,0.7693559637293652,0.9921443991364836,0.9727580692442673,0.8986584269684228,0.006902589151893154,0.00277696490977925,0.8075869683613601,0.9987530329507811,SEKER
33143,648.3849999999999,222.52630953984732,189.73737926439088,1.1728121807235805,0.5224801567742307,33377,205.42389888023615,0.769979555803364,0.9929891841687389,0.9906853996160323,0.923144320799745,0.006714126951086121,0.0030077914493752437,0.8521954370248226,0.9994651888997669,SEKER
33159,653.8009999999999,222.44402868828985,189.98042001963083,1.1708787077389582,0.520175444011767,33415,205.4734777626379,0.788111422731378,0.992338770013467,0.9748103412811874,0.9237086694314788,0.006708405823103527,0.003012584024718656,0.853237705982873,0.9990378625753795,SEKER
33168,680.6210000000001,234.31554800768953,180.58275392822776,1.2975521909518433,0.6372200519486502,33542,205.50136062755368,0.7612402744945033,0.9888498002504323,0.8997429641899918,0.8770282739445431,0.007064506391934682,0.0025781961958459988,0.7691785932981446,0.9980493689672646,SEKER
33171,654.3379999999999,222.2536490089382,190.36145322938464,1.1675349459594828,0.5161380426665781,33429,205.51065407518433,0.7902372784448256,0.9922821502288433,0.9735631873621047,0.9246671764067166,0.006700239637301805,0.0030214253189055082,0.85500938712397,0.9982533385906349,SEKER
33194,664.6579999999999,232.30854425480328,182.08560166403646,1.2758205049262075,0.6210015723331219,33520,205.58188988317767,0.7736988089410997,0.9902744630071599,0.944219534016819,0.8849519097226533,0.0069985100998615195,0.0026476711280204015,0.783139882521771,0.9991459203467769,SEKER
33236,660.788,210.85800248716706,200.92736730990677,1.0494240048541692,0.3032730940431907,33611,205.711909010679,0.7682847896440129,0.988842938323763,0.9565205816000192,0.9755945071290275,0.006344265329376792,0.003545181597219614,0.9517846423403298,0.9988256511234821,SEKER
33248,660.0679999999999,230.96983467743988,183.42924865500598,1.2591766927631498,0.6076960241397734,33511,205.74904224164615,0.7876619838430741,0.9921518307421444,0.9589545683883137,0.8908048210234218,0.00694687905069297,0.0026983590374317526,0.7935332291585704,0.9991985470895517,SEKER
33251,658.962,217.45216297661577,194.98348254754376,1.1152337630629474,0.44269350294137366,33565,205.7583245022881,0.7579439252336448,0.99064501713094,0.9622631012955074,0.9462233977613496,0.006539717992740542,0.0032338026694238697,0.8953387184710332,0.9985119682164072,SEKER
33276,704.4929999999999,234.78813839893374,180.7054960412874,1.2992860955667314,0.6384618999550885,33857,205.83566039587814,0.759656652360515,0.9828395900404643,0.8425343484139729,0.8766867943138515,0.007055780093729227,0.0025710034444863653,0.7685797353242974,0.9986049634412182,SEKER
33316,670.587,229.2180829467945,185.27936152586796,1.2371484932756096,0.5887565614959352,33699,205.95933742463993,0.7826168663377966,0.9886346775868721,0.931005952172734,0.8985300582609211,0.0068801201508822945,0.002766344260699407,0.8073562655983743,0.9988195875216519,SEKER
33319,668.6010000000001,225.01723780818773,188.8365102736357,1.1915981580157562,0.5438088924235495,33732,205.96861020803846,0.7960387996941896,0.9877564330605952,0.9366293850989834,0.915345918447426,0.00675342110532092,0.0029244526283231254,0.837858150418362,0.9983902287170083,SEKER
33325,674.433,223.82548417747665,189.73570637668686,1.179669807290308,0.5304841849822454,33701,205.98715452255584,0.7989690721649485,0.9888430610367644,0.9206666205850317,0.9203025083561246,0.0067164436362333576,0.002971950421599066,0.8469567068865749,0.9991292551961196,SEKER
33330,653.776,224.36016669382187,189.4313875125282,1.1843874958630265,0.5358420113304302,33580,206.00260684278481,0.7901849217638691,0.9925550923168552,0.9799123481169953,0.9181781680698735,0.006731478148629519,0.002951195986782923,0.843051148320149,0.99849923844335,SEKER
33333,679.262,220.5312914414884,192.716705596529,1.144328877763155,0.4861513060050803,33834,206.01187767858718,0.7722407561857103,0.9851924100017734,0.9078406547292549,0.9341616617397195,0.0066160049032936855,0.003107876410897049,0.8726580102643143,0.9986077615567908,SEKER
33338,659.103,232.26379452555997,182.91850915708574,1.2697664965446323,0.6162553926930306,33639,206.02732814454703,0.7767474370922647,0.9910520526769524,0.9643680853766637,0.887040223231496,0.006966938464381785,0.002660694375687741,0.7868403576305822,0.9991035242485098,SEKER
33344,661.5079999999999,225.31805608763221,188.66852597339377,1.1942535456041397,0.5466776795258796,33692,206.04586717439702,0.7633524873514801,0.9896711385492105,0.9575409585064406,0.9144667353878656,0.006757379321246168,0.0029149406055748927,0.8362494101309406,0.9986938230582463,SEKER
33382,659.4340000000001,222.87010441136147,190.92024898704648,1.1673466046363825,0.5159086541375102,33730,206.16324231625092,0.7816883268938063,0.9896827749777646,0.9646717179616354,0.9250376709822241,0.006676355653087336,0.0030154831303148477,0.8556946927362177,0.9988922941709963,SEKER
33399,664.7009999999999,221.5599424837891,192.0898879263484,1.1534180423320366,0.49832841485787577,33752,206.2157306187132,0.7614911080711354,0.9895413605119696,0.9499279440782307,0.9307446477325269,0.006633729826754965,0.0030708579855499274,0.8662855992827458,0.9991894400251398,SEKER
33421,654.804,219.54408232997923,194.0253903421218,1.1315224360217018,0.4679308802233709,33691,206.28363683189676,0.7633851073549566,0.9919859903238254,0.9795049994230773,0.9396000777732112,0.0065690458792369835,0.003158306208261635,0.8828483061514245,0.998962666014093,SEKER
33423,659.036,224.16805278239028,189.9810797379727,1.1799493564915475,0.5308049734733923,33707,206.28980901557728,0.7729827239297856,0.9915744504108939,0.9670234720394467,0.9202462458637307,0.00670699975413309,0.002967045940751621,0.8468531530262897,0.9992438329562086,SEKER
33427,665.6099999999999,228.22318202970675,186.62586558856935,1.222891485646699,0.5755962414672151,33789,206.30215282895688,0.7544916937522571,0.9892864541714759,0.9481293467990191,0.9039491562347224,0.0068275101573490515,0.002812018234436997,0.8171240770574667,0.9992540765504931,SEKER
33429,658.605,229.44609053267402,185.6980933664193,1.2355866792877146,0.5873512594443964,33713,206.30832445868913,0.791743640756004,0.991575949930294,0.9684633771260541,0.8991581594601631,0.006863683943063628,0.002767460293008123,0.8084853957237883,0.9989537853549694,SEKER
33431,666.841,219.90740765893452,193.6804684520286,1.1354134436813481,0.4736067086075595,33788,206.31449590380512,0.7887088022270979,0.9894341186219959,0.9447450897337177,0.9381880224052692,0.0065779488396678085,0.0031436181723978373,0.88019676538471,0.9993872405026373,SEKER
33433,657.349,225.00251253121743,189.56601542545582,1.1869348629089929,0.5386866213154292,33708,206.32066716432143,0.77680708194893,0.9918416992998694,0.9722841346383821,0.9169705033213617,0.006729952817013652,0.0029350347330017196,0.8408349039614311,0.9980162614625573,SEKER
33446,656.077,224.23393378684406,190.25659856699997,1.1785868951498089,0.5292375241215144,33713,206.36077585920307,0.7678145087235997,0.992080206448551,0.9764374399599959,0.9202923588513096,0.006704357285978714,0.002966471482303701,0.8469380257601075,0.9981900581649139,SEKER
33447,664.4119999999999,226.11861537920643,188.74064076551045,1.1980388243999553,0.5507087249162412,33791,206.36386082053463,0.7702245250431778,0.9898197744961676,0.9521209008483963,0.9126354346123047,0.006760505138852705,0.0028929985628353768,0.8329034365099903,0.9978506539151116,SEKER
33459,655.4139999999999,219.1299474401089,194.54310016003433,1.1263825201708466,0.46023357712342955,33765,206.40087675999297,0.7863085166384659,0.9909373611728121,0.9787942133227138,0.9419108577863601,0.0065492079093848864,0.0031798581955208485,0.8871960640158366,0.9993221384718138,SEKER
33468,659.987,224.45993890507262,189.95434639638611,1.181652029360161,0.5327497603712816,33748,206.4286343586965,0.7923295454545455,0.9917032120421951,0.9655368690791334,0.9196680501904537,0.006706703086681983,0.002959465211410821,0.8457893225411113,0.9994286693918597,SEKER
33498,657.523,227.93807690878097,187.31605433833803,1.2168635396145477,0.5697979371475652,33745,206.5211327432098,0.781494960806271,0.9926803970958661,0.9736589142786523,0.9060405156697796,0.006804527939243566,0.0028285785175230145,0.8209094160351601,0.9989347376994564,SEKER
33534,657.067,218.84475182553408,195.19285357250217,1.121171947743705,0.4521856322679839,33793,206.63207614779694,0.7835046728971963,0.9923356908235433,0.9760586438275264,0.9441947975637394,0.006526055699455301,0.003199461964284439,0.8915038157464307,0.9995290695213709,SEKER
33538,658.2840000000001,227.51868144371298,187.9440519109388,1.2105660122275508,0.5635823762705985,33800,206.6443995159992,0.7605161114764507,0.9922485207100592,0.9725690066380462,0.9082524485670511,0.006783907252779324,0.0028476458304244508,0.8249225103280438,0.9986231537245602,SEKER
33539,662.418,223.68353624973383,191.20060212160269,1.1698892878353602,0.518987647749282,33915,206.64748024322148,0.7642648801385471,0.9889134601208904,0.9604963599997237,0.9238385788594996,0.0066693561599849085,0.0029967329954702034,0.8534777197891402,0.9984744417874645,SEKER
33547,653.512,213.7540709486454,199.92570139022538,1.069167543053552,0.3538369940808258,33832,206.67212440779358,0.7835704108565156,0.991576022700402,0.9870892436642872,0.9668687173562497,0.006371779024909691,0.0034348715811599235,0.9348351166021196,0.999495364777669,SEKER
33560,669.259,227.9361767583609,187.85659207596547,1.2133520268811648,0.5663524882475807,33897,206.71216490887048,0.7398589065255732,0.9900581172375137,0.9415499742975526,0.9068861637001556,0.0067919003801657,0.0028338846825981846,0.8224425139107855,0.9979122912468921,SEKER
33576,666.3389999999999,224.58872530013898,190.4630177868087,1.1791723553993472,0.5299123033067706,33927,206.76143488094635,0.7617923993193421,0.9896542576708816,0.9502729231562727,0.9206225050016721,0.0066889660858988256,0.0029639106381944952,0.8475457967155539,0.9994025734218959,SEKER
33583,657.754,221.7110512283511,192.9504090774704,1.149057171158073,0.4925595961499997,33868,206.7829868022052,0.7753024286637732,0.9915849769694106,0.9754440361381915,0.9326688302480206,0.006601883429960131,0.0030814666088826033,0.8698711469162113,0.99953167934757,SEKER
33584,658.848,223.73518256806022,191.35448239784935,1.1692184043166935,0.5181789839727813,33884,206.78606546473506,0.7480565764561755,0.9911462637232912,0.9722362759979826,0.9242447392100738,0.006661957556219039,0.002998676203058867,0.8542283379574974,0.9987794942287663,SEKER
33607,690.171,214.7652972149895,199.52414320153474,1.0763875176652682,0.3699957627376703,34162,206.85686205662748,0.770802752293578,0.9837538785785376,0.8865968749868307,0.9631763824932791,0.006390492969172776,0.0033926372323237527,0.9277087437928394,0.998574111847539,SEKER
33620,670.224,222.7760832906297,192.22603183104624,1.1589277537936948,0.5054318014278295,34012,206.89686680565313,0.7832448047712236,0.9884746560037634,0.9405191059221097,0.9287211793545143,0.006626296350107963,0.003040829126914978,0.8625230289816398,0.999601876573026,SEKER
33623,659.4079999999999,217.37186200566785,197.08378273356783,1.1029413937093289,0.4218481710050962,33918,206.90609757237794,0.7932384929341544,0.9913025532165811,0.9717127498335429,0.9518531776066903,0.0064649752254607815,0.003273606572240893,0.9060244717199535,0.9992918935735638,SEKER
33631,669.076,224.88940026130328,190.7533660295636,1.1789537712611013,0.5296605896931015,34009,206.93071093723196,0.7628844932401778,0.9888852950689523,0.9440581402188102,0.9201443496082752,0.006686967389054839,0.002956874025275748,0.8466656241160356,0.9981796305487345,SEKER
33639,663.03,224.66290642084599,190.85310048234305,1.1771509388794597,0.5275745600037568,33919,206.9553213747985,0.7862518698578908,0.9917450396532916,0.9615825694632485,0.9211815366935695,0.006678644026898719,0.0029665314571694404,0.8485754235451262,0.9989013565361806,SEKER
33717,664.3629999999999,231.62252548744868,185.6531262254702,1.2476090771891986,0.5979503763979273,33985,207.19511994696083,0.7662257976547586,0.9921141680153008,0.9599484570508697,0.8945378672083794,0.006869606592741011,0.0027133545625054076,0.800197995869716,0.9983342831956624,SEKER
33731,671.6959999999999,231.17201261989578,186.1264562201042,1.2420158709008187,0.5930811477847272,34073,207.23813134522752,0.8032146684129063,0.9899627270859624,0.9394930171745406,0.896467219351412,0.006853399324653754,0.0027303822656192488,0.8036534753716528,0.998150371116193,SEKER
33736,655.7289999999999,221.3902680478974,194.13595156285277,1.1403877863200462,0.48068252930978544,33988,207.25349039566365,0.7868638335588002,0.9925856184535718,0.9859494974918117,0.9361454422686037,0.006562433840641967,0.003108980583349327,0.8763682890802799,0.9993996931853468,SEKER
33794,665.826,218.99989395505634,196.577721811977,1.1140626309858537,0.4407791167032513,34127,207.43157227090597,0.7777317499769861,0.9902423301198464,0.9579171831503972,0.9471765877360451,0.006480437176867383,0.0032174209554769635,0.8971434883552979,0.9994740350089296,SEKER
33809,669.3409999999999,230.24749713459664,187.1642997507299,1.2301891837345371,0.5824268727609625,34143,207.47760305139232,0.7840677179962894,0.9902176141522421,0.9483034553798266,0.9011068768756534,0.006810242749995464,0.002769794646444638,0.8119936035525938,0.9989057483520307,SEKER
33824,656.3389999999999,220.75386483695198,195.2815454499328,1.1304389481777728,0.4663275549513679,34079,207.52362362179915,0.7884382284382284,0.992517386073535,0.9866847311746488,0.9400679067389165,0.006526545199767975,0.003144126554291797,0.8837276692804881,0.9990001769370296,SEKER
33838,661.029,222.97351366726056,193.48363834104393,1.152415344155542,0.4970136919629081,34146,207.5665669484092,0.7821283284023669,0.990979909799098,0.9731359672425134,0.9309023459089276,0.006589441269202097,0.003052423955411561,0.8665791776187448,0.9986591412135324,SEKER
33845,670.945,226.3816047704176,190.5214244802563,1.1882212480196814,0.5401105065345906,34159,207.58803528036384,0.763926507764536,0.9908076934336485,0.9447796730477572,0.9169827888219405,0.006688775440106887,0.002917232987169734,0.8408574349956637,0.9991246708171755,SEKER
33849,669.571,221.61048097811062,194.67134891468825,1.138382623912613,0.4778540055985195,34239,207.60030190185302,0.7862717770034843,0.9886094804170683,0.9487732593185922,0.9367801603316702,0.0065470318466752525,0.003110104301307849,0.87755706879103,0.9989957186033939,SEKER
33858,664.4599999999999,234.33500135412973,184.13929158842225,1.2725964096674276,0.6184869353613691,34142,207.627899150483,0.7812543264571508,0.9916817995430848,0.9636814093270455,0.8860302470850837,0.006921111741807836,0.002631175494360336,0.7850495987496545,0.9990513007796651,SEKER
33860,683.3149999999999,225.53501538521542,191.52116134487306,1.17759841158802,0.5280939874898085,34319,207.63403137427306,0.7751831501831502,0.9866254844255369,0.9112864422024723,0.9206288035568786,0.006660809668789587,0.0029515151757535784,0.8475573939385697,0.9980822408317415,SEKER
33864,662.8979999999999,221.2164258314313,195.06351782969685,1.1340738047417336,0.4716668624373032,34167,207.6462952785615,0.7716004374772147,0.9911317938361577,0.9683998244245622,0.9386567679056059,0.006532495447420013,0.0031281397131877305,0.8810765279349986,0.9992058103038801,SEKER
33866,668.4209999999999,230.93115856234263,186.8608750681744,1.2358454303400304,0.5875846814914162,34171,207.65242695909194,0.7999338624338624,0.9910743027713558,0.9525188883534276,0.8991962290919425,0.006818967653763144,0.0027498962000582,0.8085538584131694,0.999247591103715,SEKER
33876,666.9659999999999,228.1491732215778,189.1647867751134,1.2060869103128087,0.5590593418990917,34211,207.68308264624824,0.7882722513089006,0.9902078278916138,0.9569617899852102,0.9102951359133221,0.006734832129577807,0.0028525641924698705,0.8286372344674535,0.9994085218890015,SEKER
33930,666.214,224.15096878128537,192.86056216026702,1.1622436763147876,0.5096112598916206,34251,207.8485452267205,0.762729009778577,0.9906280108609967,0.9606522715113435,0.9272703408635636,0.006606276710323765,0.003012742395804492,0.8598302850452293,0.9993323114977593,SEKER
33946,667.313,231.54253969433873,187.0289920993287,1.238003461898407,0.5895221873995569,34246,207.89754588638084,0.7912267207421393,0.9912398528295275,0.9579421876681037,0.8978805629446241,0.00682090790356268,0.0027346152359717,0.8061895053137554,0.9980653985245932,SEKER
33946,668.564,234.75484496748282,184.29373848497198,1.2738080354619625,0.6194353825333868,34280,207.89754588638084,0.7615308686288585,0.9902567094515753,0.9543605874553165,0.8855942713990753,0.006915537764905521,0.002623885710175942,0.7842772135348592,0.999018616630421,SEKER
33961,690.353,238.19249889240353,181.65429721468107,1.311240650756007,0.6468272924384669,34379,207.94347351804737,0.7704051540311239,0.9878414148171849,0.8954635260436054,0.8730059698982365,0.007013706866476357,0.002513021636851681,0.7621394234779605,0.9993481936080489,SEKER
33961,667.497,233.11383397158048,185.73329780606045,1.25509984868192,0.6043099029714659,34279,207.94347351804737,0.7711924063855394,0.9907231832900609,0.9578371946608222,0.8920254537248884,0.006864162833001987,0.0026808735399262975,0.7957094100930928,0.9986947602026207,SEKER
33969,666.3889999999999,222.36183258115275,194.7690371955832,1.1416693114206926,0.4824738405585484,34260,207.96796410771717,0.7647058823529411,0.9915061295971979,0.9612514033166444,0.935268259366488,0.006546022331571514,0.0030895983767304206,0.8747267169784205,0.9986486486540366,SEKER
33972,672.812,232.98826925182516,185.91562472779725,1.2531935903340448,0.6027086746541983,34349,207.97714733533334,0.7856614246068455,0.9890244257474744,0.9430691144361364,0.8926507244471671,0.0068582441202115025,0.0026860800401307433,0.7968253158560521,0.9985763784467052,SEKER
33993,669.092,219.75057468040796,197.0923213620353,1.1149626386344709,0.44225158361953343,34299,208.04141857856666,0.778228021978022,0.9910784570978746,0.9541742314155844,0.946716152533979,0.006464583140070249,0.003203313439301021,0.8962714734687404,0.9993092069915118,SEKER
33996,663.7429999999999,223.09635806856812,194.38087645056177,1.1477279151239437,0.4907744788998699,34285,208.05059856394692,0.7646939739523585,0.9915706577220359,0.969700850948088,0.9325593674640044,0.00656242964079798,0.003061613600232971,0.869666973844864,0.9981410627431148,SEKER
34004,659.963,229.0597505344207,189.1650396805996,1.21089896378941,0.5639151514160147,34277,208.0750765449204,0.7819707945268484,0.9920354756834029,0.9810715807244832,0.9083877724456574,0.006736258985249402,0.002829330343920333,0.8251683451287833,0.9991954940682661,SEKER
34027,670.16,231.65770534003275,187.41236571414854,1.2360854869809903,0.5878010252259568,34334,208.1454347054083,0.7785073670723895,0.9910584260499796,0.9520867478784445,0.898504258254166,0.006808055524731324,0.0027370542821871964,0.8073099021008691,0.9979040534829283,SEKER
34036,666.067,226.92801020670004,191.1104705915382,1.187417986593288,0.5392223692122651,34369,208.17295968642517,0.7538427464008859,0.9903110361081207,0.964078825789416,0.9173524215754961,0.006667293753869433,0.002912555432596112,0.8415354653704268,0.9992543479369976,SEKER
34051,677.272,227.62094579789553,190.66400362673082,1.1938328235439581,0.5462254243503953,34502,208.21882656901374,0.7579015313390314,0.9869282940119414,0.9328536007679716,0.9147612748867632,0.006684706639978137,0.0028873085703971383,0.8367881900324564,0.9989852076146856,SEKER
34053,671.582,232.43614413293815,186.7914403235722,1.2443618601061015,0.5951363260970111,34362,208.22494138999414,0.7439863669135479,0.9910075082940457,0.9487835524842172,0.895837186452823,0.006825717091972459,0.0027117171723651636,0.80252426463171,0.9986305867173958,SEKER
34060,662.146,220.43837742333972,196.8822030130114,1.1196460322458477,0.44977993392159693,34367,208.24634184945396,0.7890834955055138,0.9910670119591468,0.9762183975020567,0.9446918648358964,0.006472060405852605,0.0031796771552011897,0.8924427194871236,0.9992199498804522,SEKER
34082,668.346,230.62694695756085,188.39128290379577,1.2241911802009078,0.5768276533790457,34364,208.3135861235743,0.8017407668783816,0.991793737632406,0.9588092822219659,0.9032491166867306,0.0067668255078211625,0.0027784009742379667,0.8158589667953592,0.998767351438704,SEKER
34097,680.5949999999999,227.81914201365322,190.81017122854738,1.1939570125995929,0.5463590100603352,34502,208.35942204957962,0.7622507377269069,0.9882615500550693,0.9250144672419244,0.9145825948071239,0.0066815010708758315,0.0028836698304357676,0.8364613227241318,0.9986988620348083,SEKER
34104,667.289,229.47873598019265,189.54404171042142,1.2106882068642497,0.5637045608739751,34421,208.38080869803724,0.7984267453294002,0.9907905057958805,0.962470112304693,0.9080615151899021,0.006728792399137716,0.002822136219579114,0.8245757153689807,0.9983040942638771,SEKER
34113,673.914,221.24236619821045,196.51038183482154,1.1258558664049494,0.45943158071702483,34492,208.4083025926525,0.7746616404759742,0.989011944798794,0.9438887744993865,0.9419909313659213,0.006485573423569034,0.003150032469535275,0.887346914775636,0.9990247295364825,SEKER
34130,666.585,235.54134778222698,184.7780344521473,1.274725908198932,0.6201511211669004,34392,208.46022561105295,0.7955154651189893,0.9923819492905327,0.9652394845922767,0.8850260371431166,0.006901299378324846,0.0026117693496699613,0.7832710864212493,0.998455947004291,SEKER
34131,668.091,224.3380185576345,193.8042126797846,1.1575497532053123,0.5036740854902436,34473,208.46327950350351,0.7706254233461278,0.9900791924114525,0.9609208885298933,0.9292374107777339,0.006572852203499297,0.003023015498399568,0.8634821655889072,0.9995235676746281,SEKER
34151,674.271,231.51360089503967,188.0356230220447,1.2312220268384877,0.5833774257124232,34580,208.52434796025747,0.7504559738062276,0.987593984962406,0.9439398619869639,0.9007002057507423,0.0067791163039161275,0.0027521613741877267,0.8112608606394297,0.9988422411312144,SEKER
34151,662.1289999999999,226.5248185142711,192.2363363801511,1.1783662900561829,0.5289827785945032,34389,208.52434796025747,0.7782107373985963,0.9930791822966646,0.9788768775073232,0.9205364309656004,0.006633036177982229,0.0029380288206677665,0.8473873207348857,0.9985326533750161,SEKER
34179,677.064,225.06050174252638,193.59289279424559,1.162545269581385,0.5099879303501837,34576,208.60981376604295,0.7780155243449955,0.9885180472003702,0.9369356647594377,0.9269054860843448,0.006584759698719283,0.0029982062412914775,0.8591537801332555,0.9988051629368815,SEKER
34191,661.403,223.98091490633587,194.47467302144932,1.1517227998199653,0.49610159200377546,34445,208.64643125162706,0.7719801309550689,0.9926259253883002,0.982176064204513,0.9315366505172042,0.006550873472736564,0.0030428375015920397,0.8677605312568121,0.9994195886323562,SEKER
34207,668.737,228.03246867789173,191.41545354641556,1.191296023665075,0.5434802975676558,34515,208.69524457149404,0.7577308169413433,0.9910763436187165,0.9612008506823263,0.9151996896822945,0.006666251605750043,0.0028848611875222615,0.837590471994568,0.9978181987468822,SEKER
34207,661.1379999999999,226.87351766047715,192.19470806825427,1.1804358191793052,0.5313621952055784,34421,208.69524457149404,0.7742994250531939,0.9937828651114146,0.9834235685968524,0.9198748568081558,0.0066323710837102685,0.00292929812233685,0.8461697521878253,0.9988490845885852,SEKER
34220,677.5269999999999,233.18301931485547,186.95910424089845,1.2472407816759599,0.5976329790268797,34577,208.73489698858995,0.7737529959752182,0.9896752176302166,0.9367779408657143,0.895154791296126,0.0068142320080320125,0.0026989152118127623,0.8013021003804109,0.9994166580370523,SEKER
34222,671.9939999999999,223.2982637909043,195.23836810985165,1.1437212160330321,0.4853157852341805,34576,208.74099669189744,0.7843325999266594,0.9897616844053679,0.9523234097450136,0.9348079700582078,0.006524991636692896,0.0030736141579176318,0.8738659408843472,0.9994590165580951,SEKER
34239,666.439,232.68629338929807,187.72434612570663,1.2395104747547416,0.5908654604031768,34510,208.7928369752833,0.7695540771374629,0.9921472037090698,0.9687464586502148,0.8973147233299231,0.006795943029565644,0.002717744762542283,0.8051737127046564,0.9980212508945868,SEKER
34246,684.324,229.90850418966878,189.9911444177677,1.2101011596841986,0.5631169810295429,34732,208.81417923359606,0.7795583883450945,0.9860071403892664,0.9189590803998924,0.9082490444169459,0.006713441108148945,0.0028180243711207996,0.8249163266842954,0.9982322035630952,SEKER
34253,672.539,228.00427994341675,191.36853232101504,1.1914408141091155,0.5436378245352474,34556,208.83551931080478,0.7928935185185185,0.9912316240305591,0.9516418464822549,0.9159280666250256,0.006656476219409008,0.0028898121751009787,0.8389242232314574,0.9995285595027449,SEKER
34254,668.704,223.968828567707,194.92918606396265,1.1489753437651737,0.4924500720489869,34575,208.83856771525288,0.7753633030014939,0.9907158351409978,0.9626165305630868,0.9324447917631531,0.006538472253392508,0.0030489377528400124,0.8694532896862298,0.9989803924049974,SEKER
34259,676.4019999999999,227.5449240584587,191.86803821078993,1.1859449139125164,0.537585123069977,34623,208.85380907008124,0.7701247611554457,0.9894867573578258,0.9409678386370264,0.9178574733507326,0.00664190210042496,0.0029078582103898073,0.8424623413857909,0.9991139289293088,SEKER
34276,689.6259999999999,229.55897721496254,190.41150657850127,1.2055940386161583,0.5585563026546196,34738,208.90562135888644,0.7631133671742809,0.986700443318556,0.9056757611201464,0.9100302845628382,0.006697367756300692,0.0028333960937695917,0.8281551188215203,0.9984188743006812,SEKER
34291,671.5070000000001,230.65806702918732,189.62393120757562,1.216397453424235,0.569343532771492,34619,208.9513274150549,0.7820425104907863,0.9905254340102256,0.9556281312607998,0.9058921290128314,0.006726489954483314,0.0027943075593037324,0.8206405494074004,0.998225074475827,SEKER
34313,671.844,220.93397542609213,198.10385195254597,1.1152432082896344,0.4427088844328233,34600,209.01834488507853,0.796975890741859,0.9917052023121388,0.9552821621713989,0.9460670070412068,0.006438783418124097,0.0031817874803614075,0.895042781811907,0.9981903835443905,SEKER
34321,669.5310000000001,227.99584508110556,191.8273267135762,1.188547267937137,0.5404700458004247,34652,209.04270954724905,0.7874678781204112,0.9904478817961445,0.9621181711133079,0.9168706976782219,0.006643042017455947,0.002895870490258703,0.8406518762609492,0.9991544908161794,SEKER
34327,677.3109999999999,231.15812834274797,189.30437178706862,1.2210923929572892,0.5738807890179418,34714,209.06098118042956,0.7935961160559473,0.9888517600967909,0.9403065389491094,0.9044067914862417,0.006734003214459404,0.0027791266694071485,0.8179516444864384,0.9987945308892949,SEKER
34333,665.6859999999999,229.2148642495168,190.871870066735,1.2008834207438521,0.5536938732531718,34592,209.07925121683485,0.7790560471976401,0.9925127197039778,0.9736049442008282,0.91215398225325,0.006676225912373425,0.002850909431889278,0.8320248873404623,0.9991648928534326,SEKER
34337,667.785,229.80676046303572,190.62958463779998,1.2055146681438411,0.5584751947549935,34583,209.09143035421437,0.8097967077024668,0.9928866784258161,0.9676067589889394,0.9098576122517797,0.006692686037307736,0.0028292670814580693,0.82784087457251,0.9979743171861867,SEKER
34349,674.8629999999999,238.23124327213023,183.72493694297447,1.29667342515444,0.6365878351024455,34645,209.12796351064125,0.7833652618135377,0.9914561985856545,0.947747670509757,0.8778360077303359,0.006935609283301704,0.002540492670727858,0.7705960564679345,0.999211427950781,SEKER
34390,680.24,245.01467084166455,178.9745100054243,1.368991991285456,0.682950706891803,34759,209.25273700346727,0.793932957798504,0.9893840444201502,0.9339372718587594,0.8540416632385753,0.007124590603130694,0.0023380613736413078,0.7293871625473123,0.9985251840736935,SEKER
34394,669.7620000000001,230.92113328533313,189.9052631604084,1.2159806918583378,0.568936466343328,34730,209.2649060440407,0.7816818181818181,0.9903253671177656,0.963499611561409,0.9062180800293694,0.006713994687600544,0.002793133195566964,0.8212312085721167,0.9986012931751814,SEKER
34395,665.156,231.71714714301186,189.18982594223945,1.2247865126413098,0.5773895255996104,34638,209.26794819361592,0.7912353347135955,0.9929845834055084,0.976918090431799,0.9031180936491477,0.006736942786539086,0.002764526740190354,0.8156222910764709,0.998963181520066,SEKER
34397,678.85,229.77470216151102,190.93159397655174,1.203439919899949,0.5563451176699462,34776,209.2740323600981,0.7722027658045977,0.9891016793190707,0.9379566908279493,0.91077925633866,0.006680079720949822,0.002835397361550748,0.8295188537768027,0.998276102944653,SEKER
34410,684.481,232.45793613771897,188.93962927171376,1.2303291640496532,0.5825559315582914,34802,209.31357513151636,0.8006980802792321,0.9887362795241653,0.9229363304514616,0.9004363482239177,0.006755534325420487,0.0027393753263080726,0.8107856172028246,0.9975331906366333,SEKER
34412,667.1990000000001,233.95898570626764,187.39829092479127,1.2484584814071897,0.5986806829854633,34677,209.31965797178825,0.7874599542334096,0.9923580471205699,0.9714243934193179,0.8946852686162107,0.006798761644376021,0.0026871426657068117,0.8004617298788611,0.999343235709135,SEKER
34419,687.797,224.14324566803447,195.61516273426614,1.1458377895404885,0.48821412476615095,34885,209.34094652083613,0.7752027027027028,0.9866418231331517,0.9142975540104176,0.9339605389264276,0.006512195173248336,0.003056478035422918,0.8722822882717429,0.9994940090486132,SEKER
34421,678.034,232.4039146149295,189.14974745636022,1.22867684329607,0.5810278789964333,34762,209.34702856579796,0.7557082638096074,0.9901904378344168,0.9408716942086729,0.9007895969078896,0.0067518060083939895,0.0027421623659183076,0.8114218978974785,0.9969752960899798,SEKER
34425,680.5029999999999,232.64566660027586,188.5544051452977,1.2338384055307643,0.5857678246268502,34791,209.35919212565753,0.7589285714285714,0.9894800379408468,0.934165286025574,0.8999058318389898,0.006758044055200461,0.0027339404232622606,0.809830506177824,0.9991999804926183,SEKER
34428,688.178,229.73249787327833,191.37907170333813,1.200405539793781,0.5531949859555542,34908,209.36831433180663,0.7777702473737717,0.9862495702990719,0.9135242675416911,0.9113569750471059,0.006672838906508607,0.002839517112108869,0.830571535967011,0.9970226729698298,SEKER
34441,675.683,228.6978290867147,191.91520308977306,1.1916608241804358,0.543876990664141,34826,209.40783929983075,0.7908744374024066,0.988945041061276,0.9479809980295272,0.9156529387973779,0.006640278420682173,0.002879317962064595,0.8384203043282745,0.9991126308654437,SEKER
34443,684.507,234.60733000375535,187.5726238224903,1.2507546422434035,0.6006430341201401,34874,209.41391940201396,0.7846500820120285,0.9876412226873889,0.9237512694303088,0.8926145632306624,0.006811466190626698,0.0026673268749801585,0.7967607584914664,0.9965522174405769,SEKER
34447,682.912,225.08741131352778,195.3291752838704,1.152349161288425,0.4969266706637361,34853,209.42607907682404,0.7457836281365693,0.9883510745129545,0.9281790908620908,0.9304211099798521,0.006534311008608232,0.003020631768703217,0.8656834418961399,0.9975695882102937,SEKER
34461,675.775,246.7254393124309,178.15778372200398,1.3848703893702412,0.6917999253636143,34691,209.46863237993043,0.7701814768460575,0.9933700383384739,0.9482732451075333,0.848994870426305,0.007159555419530219,0.0022944895440966894,0.7207922900101783,0.9982038993214637,SEKER
34469,666.834,230.1579705139116,190.99367111305517,1.2050554825854614,0.5580054112888546,34747,209.49294467231186,0.789667812142039,0.9919993092928886,0.9740989555443877,0.9102137293118394,0.006677245365804393,0.002827161551181672,0.8284890330277667,0.9983752515120378,SEKER
34474,672.3000000000001,225.64940925786897,194.6503481240985,1.159255102456879,0.505847536217252,34774,209.50813842235343,0.7933081737849779,0.9913728647840341,0.9584629261575431,0.9284674802003602,0.006545495424315977,0.0030004685198585204,0.8620518617896061,0.999338019362053,SEKER
34475,677.6759999999999,241.04318207553527,182.36911353669487,1.3217324874863443,0.6538979603657228,34878,209.51117704013964,0.776463963963964,0.9884454383852285,0.9433436453566266,0.8691852440550901,0.0069918254409147285,0.002461612672565486,0.7554829884831065,0.9985464096213936,SEKER
34483,687.567,233.74072431538704,188.58786647936813,1.2394261024261533,0.5907904653297025,35051,209.5354843960865,0.7406778932898015,0.9837950415109412,0.9166105621839155,0.896444062153926,0.006778433556111332,0.0027002370110032633,0.803611956571032,0.9960176351958894,SEKER
34491,674.6569999999999,233.18283701023674,188.57636574139076,1.2365432756829042,0.5882130239035973,34829,209.55978893256335,0.785850991114149,0.9902954434522955,0.9522469460133066,0.898693023978277,0.0067606864692307195,0.0027202952338630623,0.80764915134722,0.9986931272094092,SEKER
34503,678.2399999999999,236.54464120597964,185.89276944430156,1.272478977601411,0.618394789345927,34885,209.59624045291778,0.7477245145631068,0.9890497348430558,0.9425402900795121,0.8860747780390612,0.006855770257832062,0.0026068588509529766,0.7851285122769713,0.9990595265879174,SEKER
34509,668.332,230.32948561905977,190.91974130784058,1.2064204782661767,0.5593991850161442,34776,209.61446383602856,0.7836542828594786,0.9923222912353347,0.9708625007051607,0.9100635260511474,0.0066744758068637096,0.0028241239988642465,0.8282156214486474,0.9991762861355958,SEKER
34521,667.908,224.75531771252312,195.68297651232194,1.1485685761651858,0.4919049130926088,34830,209.65090585018362,0.7858004598119779,0.9911283376399656,0.9724335658818553,0.9327961980340814,0.006510683865256601,0.003040559034854247,0.8701087470668374,0.9993795647274312,SEKER
34523,673.987,231.91704861257833,189.73417602823065,1.2223261695250478,0.575058573984268,34878,209.65697890337927,0.7858638743455497,0.9898216640862435,0.955026346185607,0.9040171050711114,0.006717754789924929,0.002767645754236746,0.8172469262611529,0.9989423049329141,SEKER
34532,689.5509999999999,217.02210258585615,202.71490848465746,1.0705779077037225,0.35707701910226414,35057,209.68430546608548,0.7683339266642933,0.9850243888524403,0.912638553174804,0.9661887105859747,0.006284666471268856,0.003378390381493253,0.9335206244637884,0.9994065569367148,SEKER
34543,670.896,235.01801041707847,187.29113518329902,1.2548271982390937,0.6040815875501897,34826,209.71769976276852,0.7691947982542086,0.9918738873255614,0.9644051292438524,0.892347354105286,0.006803636349392886,0.00266107194614872,0.7962838003787049,0.999198570232388,SEKER
34543,669.456,226.97544339927447,193.9725569772205,1.1701420393500803,0.5192916204364303,34827,209.71769976276852,0.7867848032069971,0.9918454072989348,0.9685584626362552,0.9239664724163675,0.006570808655857177,0.0029540880314148058,0.853714042149546,0.9989666903026704,SEKER
34594,670.0689999999998,233.4408876577448,188.86599082577766,1.2360133586627884,0.5877360433917923,34848,209.8724584374239,0.7814321210752202,0.9927112029384757,0.9682145228529496,0.8990389838866816,0.006748016640392693,0.002719380651584757,0.808271094547997,0.9990338702823178,SEKER
34600,673.252,231.43491646698135,190.45782230748082,1.215150491920179,0.5681234594179868,34919,209.89065783840078,0.7777902663819265,0.9908645722958848,0.9592474610280542,0.9069100766752528,0.006688870418120848,0.002791190348755417,0.822485887175113,0.9994441303982432,SEKER
34601,685.556,226.51953917195354,194.71875678612517,1.1633164822470474,0.5109485331003042,35048,209.8936909184775,0.7806204173716864,0.9872460625427985,0.925151041778264,0.9266030280908563,0.006546618281898025,0.0029769506974895795,0.8585931716671443,0.9988155881451579,SEKER
34622,683.3820000000001,235.92880475975045,187.05308479793214,1.2612933115463842,0.6094337519589811,35010,209.9573754785023,0.7637262038691461,0.9889174521565267,0.9316117235115191,0.8899183619918932,0.006814418715260541,0.002636387534141502,0.7919546910103344,0.9988871548191182,SEKER
34623,675.213,228.19437071770486,193.50330052000945,1.1792789585731545,0.5300349695630745,34965,209.96040759477856,0.759576148479663,0.9902187902187902,0.9543176788717901,0.920094597138493,0.0065908318377293955,0.0029137340936469386,0.8465740676834456,0.9983469848927727,SEKER
34626,667.845,231.88842108625673,190.4682828757511,1.2174647536331569,0.5703827784056116,34913,209.9695036808911,0.7618481848184818,0.991779566350643,0.9755753782941737,0.9054764472383365,0.006696945101549608,0.0027769312907890216,0.81988759650336,0.9981842506838443,SEKER
34629,670.997,233.1312207665088,189.68287486803732,1.22905782047377,0.5813811069138397,34915,209.9785993729693,0.7458163726820444,0.9918086782185307,0.9665151311983214,0.9006884564091574,0.006732253913382101,0.0027329937398894192,0.8112396955087109,0.9970604920437409,SEKER
34631,670.02,229.33678369647345,192.40140258159565,1.1919704358663075,0.5442131577940323,34953,209.98466294880544,0.7606862012915696,0.9907876291019369,0.969391848199118,0.9156170221115489,0.006622297470372598,0.0028710706518692494,0.8383545311804206,0.9992938159416198,SEKER
34635,667.6379999999999,227.06322454942782,194.41521973071224,1.1679292643031594,0.5166176101830866,34929,209.99678957522744,0.764012970683608,0.991582925362879,0.9764341520723405,0.9248384012511665,0.006555889260846768,0.0029585219032407305,0.8553260684288138,0.9989603458393784,SEKER
34638,677.314,234.6904502499939,188.33979967222592,1.2461011993133344,0.5966480298795837,34989,210.00588408550976,0.7578767722737616,0.9899682757438052,0.9488172392504463,0.8948207473368006,0.0067755196677058115,0.0026795789252025055,0.8007041698643904,0.9977584263632048,SEKER
34666,681.015,225.79266717652843,195.82776517496245,1.1530166162841813,0.4978028993950144,35034,210.09074719698904,0.7977998711221578,0.989495918250842,0.9392911732279462,0.9304586806299455,0.006513375271924318,0.003011440116912284,0.8657533563596187,0.9982280054864406,SEKER
34671,674.8739999999999,235.58951949341233,187.64972443295957,1.2554749025361873,0.6046235865299315,35015,210.10589771711034,0.7657699443413729,0.990175639011852,0.9566010166614723,0.8918304098115257,0.00679500214857986,0.0026515417445817065,0.7953614798645937,0.9985563764140386,SEKER
34676,668.424,226.44750669913543,195.1937880282233,1.1601163591660668,0.5069380327487042,34982,210.12104714482197,0.7779073941134242,0.9912526442170259,0.9752922839673075,0.9279017914911059,0.00653038143670364,0.0029862513875079768,0.8610017346524039,0.9988621976406147,SEKER
34680,669.5749999999999,231.2624473110722,191.24109612009553,1.2092717099145054,0.5622842699112522,34941,210.13316590061513,0.7759430796080011,0.9925302653043703,0.9720542263546236,0.9086350522701336,0.006668467338842913,0.002803907854341434,0.8256176582139486,0.9983960772839913,SEKER
34700,690.412,233.63013623425365,189.50181499077016,1.2328649002418937,0.5848813201491644,35154,210.19374919894773,0.7478770636665374,0.9870853956875463,0.9147926706928105,0.8996859420061846,0.006732856951995782,0.0027210898860729805,0.8094347942435558,0.9979237468573993,SEKER
34703,676.387,230.76931554445852,191.76266092952113,1.2034111042570148,0.5563153984100059,35025,210.2028351876928,0.7732397504456328,0.9908065667380442,0.9532051505064941,0.9108786178602523,0.00664983763779669,0.0028237928509219534,0.8296998564750037,0.9984700204824708,SEKER
34722,670.391,227.25935149840683,194.73186267916822,1.167037321842032,0.5155315034794671,34999,210.26037066526428,0.7903758166215201,0.9920854881568045,0.9708636617025157,0.9252000821041605,0.006545111211865872,0.0029582811320311387,0.8559951919255452,0.9989783362944445,SEKER
34729,671.193,228.81027135269554,193.65763511226822,1.1815194955781032,0.532598936854611,35043,210.2815639781754,0.7771437522377372,0.9910395799446394,0.968740162417395,0.9190215226572613,0.006588449749566516,0.0028991169146633414,0.8446005591072709,0.997912026561407,SEKER
34733,670.564,228.3272478148244,193.8600235946251,1.1777943878324946,0.5283211301893465,35019,210.29367348374132,0.7778076363229202,0.9918330049401753,0.9706701895295027,0.9210187373444431,0.006573784234440572,0.0029178910425737364,0.8482755145395523,0.9990941403604061,SEKER
34747,672.202,234.54041915496177,188.7259829822753,1.2427563785797806,0.5937318878612967,35043,210.33605126300316,0.7841442498645965,0.9915532345974946,0.9663347063449117,0.8968008670779825,0.0067499473092630085,0.0026931728233819618,0.8042517951918213,0.9994890484588751,SEKER
34748,669.267,221.09049586778124,200.26914135255046,1.1039668636646183,0.42365358065880115,35046,210.33907792052676,0.7704656319290466,0.9914968898019746,0.9748568639715147,0.9513709628039183,0.006362682625410994,0.0032152858675912666,0.9051067088664547,0.9992078146691047,SEKER
34750,675.599,223.1988365614265,198.52820981082235,1.124267613021408,0.45699757129806434,35091,210.3451311049222,0.8050690390139932,0.9902824085947964,0.9567240179935173,0.9424114137218325,0.006422988102487094,0.003125208734849784,0.8881392727131829,0.9985062201638195,SEKER
34757,686.779,231.22986999111677,191.67203308106656,1.2063829358627371,0.559360960741551,35150,210.36631587865975,0.7864108423648664,0.9888193456614509,0.9260152392365317,0.9097713711759707,0.006652756854478717,0.0028113212731106117,0.8276839478114059,0.9985037909271842,SEKER
34761,687.872,229.73702139712367,192.88757259850132,1.1910410727980132,0.5432026691064196,35171,210.3784205058565,0.776816840976133,0.9883426686758977,0.9231810096361353,0.9157358236232902,0.00660904523451925,0.00286681259365223,0.8385720986670259,0.9987738120148558,SEKER
34766,669.4749999999999,232.1753321905382,190.99404732945808,1.2156155410961256,0.5685792260547987,35054,210.3935503105137,0.7521038399134667,0.991784104524448,0.9747558762991739,0.9061839099161966,0.006678229655138302,0.002777835341760165,0.8211692785910059,0.9982261369259205,SEKER
34771,683.1089999999999,230.5865191193665,192.1855584052579,1.1998118955074306,0.5525737876706339,35163,210.4086790272358,0.7839781746031746,0.9888519182094816,0.9363690071575772,0.9124934095488672,0.006631575713076026,0.0028360601720736132,0.8326442224701169,0.9990164428451818,SEKER
34772,671.9469999999999,228.04767463030743,194.33663804815546,1.1734672212133184,0.5232560944664002,35103,210.41170464004867,0.7631798428514991,0.9905706065008689,0.9677640750217898,0.9226654250307582,0.006558370948760711,0.002931924121117328,0.8513114865471898,0.99898612450551,SEKER
34774,677.7259999999999,228.52221551731438,193.96029003283445,1.178190729033397,0.5287798580540847,35139,210.4177557351578,0.7805611672278339,0.9896126810666211,0.9513848244463001,0.9207759309475763,0.006571640177066612,0.002913864632283952,0.847828315012376,0.9989034605595879,SEKER
34787,677.348,230.85663793461165,192.64593164579637,1.1983468114918225,0.5510337390895738,35126,210.45708361255532,0.7268339566661791,0.9903490292091328,0.9528030432329305,0.9116354006340751,0.006636290508943331,0.0028274170823730663,0.8310791036892506,0.9959209940034952,SEKER
34792,692.1899999999999,228.0326605474431,194.3385831397018,1.1733782188970683,0.5231508092894979,35231,210.47220776251143,0.7849294980259447,0.9875393829298061,0.9125120687700369,0.9229915015560758,0.006554169365010436,0.0029341899926481315,0.8519133119447396,0.999616524624421,SEKER
34794,693.5369999999999,237.49055084799912,186.9933377168114,1.2700481939504298,0.6164785583651098,35187,210.47825711820033,0.7471975260919984,0.9888311023957712,0.9090231680656014,0.8862595011323737,0.0068256179470023316,0.002597558604820307,0.785455903347404,0.997566851474074,SEKER
34794,671.293,236.61087920035044,187.42315311623102,1.2624421010226816,0.6103711817702068,35052,210.47825711820033,0.7849746192893401,0.9926395070181445,0.9702641522508076,0.889554435660491,0.006800335667079107,0.0026266380498391204,0.7913070940032546,0.9989793903076214,SEKER
34800,671.7959999999999,226.63618857442066,195.6138269634196,1.158589820017183,0.5050018942720228,35120,210.49640414216975,0.7846320346320347,0.9908883826879271,0.9689788118919322,0.9287854930239834,0.006512534154437376,0.0029894512133643997,0.8626424920518039,0.9994488096054734,SEKER
34841,675.857,231.95696412530225,191.61127237001733,1.2105601160947046,0.5635764790160812,35137,210.62036695941302,0.7890791321284595,0.9915758317443151,0.9584971880075094,0.9080148455712531,0.006657586295608687,0.0027916975374684895,0.8244909597777866,0.9980958719876318,SEKER
34841,670.201,223.72249147378952,198.53079324574804,1.126890634022997,0.46100495546230497,35122,210.62036695941302,0.7875808128758082,0.9919993166676158,0.974743465781251,0.941435818866198,0.006421241969914455,0.0031114417151853783,0.8863014010442687,0.9987647477582464,SEKER
34847,686.6329999999999,236.42622361907488,188.06265785829453,1.2571672989819296,0.6060335548792543,35229,210.63850174027115,0.7610176894518453,0.9891566607056687,0.928807931300964,0.8909269814318382,0.006784693764716471,0.002636807705624776,0.7937508862432471,0.9978776577229358,SEKER
34850,674.2950000000001,230.43358149767062,192.75218819379856,1.19549139056199,0.5480033763479951,35119,210.64756854523725,0.7725045995611021,0.9923403285970557,0.9631917804269822,0.9141357226501582,0.0066121544188714665,0.002848167148142021,0.8356441194251268,0.9990053503464945,SEKER
34865,680.0,224.82509211730212,197.67763201253888,1.1373319774644066,0.4763592233103278,35256,210.6928967174533,0.7931795431795432,0.988909689130928,0.9475054313789631,0.9371413783632506,0.006448446640393005,0.0030679998175890703,0.8782339630405734,0.9988435698613377,SEKER
34878,671.541,225.41350364730891,197.1479559296138,1.1433722585882988,0.48483472261530236,35188,210.73217324669008,0.7652040368582712,0.991190178469933,0.9718883387317139,0.9348693394004033,0.0064629136890678625,0.003045171700831411,0.8739806817509465,0.9992852660561209,SEKER
34878,679.271,229.29698163508866,193.94987008293307,1.1822486993007066,0.5334276157257188,35217,210.73217324669008,0.7844804318488529,0.9903739671181532,0.9498943181176199,0.9190359669978418,0.00657425831857012,0.002893054130707448,0.8446271086356582,0.9985593005786236,SEKER
34879,689.973,236.19313013460476,188.39816244409465,1.253691262539213,0.6031278269200533,35298,210.73519421496195,0.7697859192231296,0.9881296390730353,0.9206820932616074,0.8922155953260177,0.0067717861789215504,0.0026470505805665026,0.7960486685429603,0.9979992603082833,SEKER
34879,675.4669999999999,223.80001449334026,198.8687463015881,1.1253654415558263,0.4586824781572389,35258,210.73519421496195,0.7923623889684,0.9892506665154007,0.9606509492671899,0.9416227907404041,0.0064164687775836535,0.0031115995071370594,0.8866534800417472,0.9978091850741907,SEKER
34882,680.0649999999999,234.5232448905755,189.53117888154608,1.2373860927501998,0.5889695913955444,35219,210.74425685994848,0.7929168939807237,0.9904313012862376,0.9477862272127905,0.8986071165708035,0.006723331371210811,0.00270423042228096,0.8074947499516938,0.999182773559026,SEKER
34883,672.664,232.32246418759735,191.46843872740118,1.2133721136064683,0.5663723420397409,35182,210.74727765500714,0.7997386400110046,0.9915013359104087,0.968784810670316,0.9071325857013615,0.006660048281042266,0.0027818916533215916,0.8228895280412382,0.9984712059040264,SEKER
34895,677.7,225.3698384108187,197.2329238681206,1.1426583046627234,0.48384761893066924,35227,210.78352381894913,0.7630324499256538,0.990575410906407,0.9547685290253809,0.9352783198731293,0.006458513781654068,0.0030484271629436436,0.8747455356247037,0.9995352507482097,SEKER
34911,677.462,235.2555983892776,189.27998880298898,1.2428973600275413,0.593855566433165,35252,210.83184234419917,0.7625152891839944,0.9903267899693634,0.9558775752486058,0.8961820410978513,0.006738724138216539,0.002681281351148544,0.803142250786311,0.9982233832288836,SEKER
34911,670.061,232.39465737889861,191.37687106677916,1.21432990352218,0.5673170773485277,35204,210.83184234419917,0.7710707659687251,0.9916770821497557,0.9771100287554381,0.9072146697437058,0.006656774580473163,0.0027815307796767597,0.8230384569981815,0.9994402100816455,SEKER
34912,676.03,230.3106060765244,193.1139791534548,1.1926148851891862,0.544911378424838,35245,210.8348618843525,0.7743767190133972,0.9905518513264293,0.9599589345833428,0.9154370503210748,0.006596889495775791,0.002857807122628297,0.8380249931005502,0.9994410809322811,SEKER
34924,816.638,258.3197874639745,181.6399257757125,1.4221531216817698,0.7110324818200706,37992,210.87109299363632,0.7120952613979283,0.9192461570857022,0.6580739114539091,0.8163180028283532,0.007396626602450306,0.002026053716100718,0.6663750817416714,0.9476874027098624,SEKER
34934,687.7909999999999,230.15919857070998,193.71721048043955,1.188119517103774,0.5399982066487802,35445,210.90128083010347,0.7570648404993066,0.9855832980674284,0.9279940735574217,0.9163278380347243,0.006588400943800022,0.0028652551775765907,0.8396567067573921,0.9976125209655377,SEKER
34936,682.5709999999999,232.02355606683054,192.05225388952454,1.208127222502158,0.5611304285095206,35353,210.90731787889115,0.7868468468468468,0.9882046785279891,0.942296064962636,0.9089909725292841,0.006641388712698378,0.0027969000260403627,0.8262645881397337,0.9982327419211459,SEKER
34945,675.1719999999999,234.98990229796314,189.55416792616109,1.2396978914729064,0.5910319585659932,35231,210.93448246024226,0.7600043497172684,0.9918821492435639,0.9633099852765707,0.8976321126887443,0.006724564381112123,0.0026930067546867146,0.8057434097300588,0.9988784061105438,SEKER
34958,672.4909999999999,231.2618910878578,192.60812547799873,1.2006860588769628,0.5534879626011663,35254,210.97371401397808,0.7979274611398963,0.9916037896408918,0.9713673216445674,0.9122718534452695,0.00661542110783963,0.0028264047874773848,0.8322399345884675,0.9992588871010479,SEKER
34960,681.462,237.561122125691,187.95105123322455,1.2639520799003479,0.611597287235674,35342,210.97974899013715,0.8034934497816594,0.9891913304283855,0.9460149527964267,0.8881072252155386,0.006795226605425944,0.002607626103861303,0.7887344434800437,0.9969225403256445,SEKER
34968,673.319,238.10867533527576,187.13764783062942,1.2723718508569593,0.618310695422861,35218,211.00388716869452,0.755509463313456,0.9929013572604918,0.9692569371407628,0.8861663140647204,0.006809330683346939,0.002590270602542073,0.7852907361830527,0.9991818274580548,SEKER
34968,750.3949999999999,242.8224520058709,184.3295471891527,1.3173278820931231,0.6509595100145872,35858,211.00388716869452,0.7433673469387755,0.9751798761782587,0.7803704114077497,0.8689636622382552,0.006944133264867047,0.002442329598284448,0.7550978462905203,0.9947114466269699,SEKER
34971,673.194,235.0015865596615,189.68945814345585,1.2388753115733906,0.5903002791027391,35269,211.01293827377833,0.782454020673916,0.991550653548442,0.9697001037452475,0.8979213347574869,0.0067198989608435985,0.0026946084554342734,0.8062627234126667,0.9988589826778779,SEKER
34980,675.2029999999999,233.00868268863945,191.34276014027327,1.2177554171258997,0.5706650011142992,35276,211.04008925992233,0.7852909482758621,0.9916090259666629,0.9641862696514328,0.9057177046999879,0.006661197332436805,0.0027650531982599826,0.8203245606070145,0.9989546774806155,SEKER
34995,679.687,236.99073340175045,188.13168470932632,1.2597066452039378,0.6081323997455951,35298,211.08533314280035,0.7579925489516548,0.9914159442461329,0.9519144838860073,0.8906902397106183,0.00677213125880127,0.0026291290448922666,0.793329103115759,0.9993619430286015,SEKER
35022,670.696,231.83618526173709,192.60363305789403,1.2036958056344154,0.5566088644243579,35293,211.16674770359765,0.7917797069994574,0.9923214235117446,0.9783615473570338,0.9108446443129481,0.0066197300343137765,0.0028105885804812986,0.829637966073581,0.9986317399578368,SEKER
35031,675.6489999999999,232.0680177644627,192.53678152779827,1.2053178406898681,0.5582739387155637,35369,211.19387891607437,0.798991880302892,0.9904436088099748,0.9643176645229737,0.9100516346480172,0.006624647248564491,0.0028028938899398157,0.8281939777255282,0.9982369769044865,SEKER
35042,676.6499999999999,225.61452125429972,197.89593407221227,1.1400664814668346,0.4802314128341106,35380,211.2270345543145,0.8000456621004566,0.9904465799886942,0.9617685622628762,0.9362297842355259,0.006438403094980301,0.003051319883154809,0.8765262088896995,0.9992981508823434,SEKER
35049,679.396,228.96319865755376,195.07521618202512,1.1737175184976225,0.5235519415302241,35349,211.24813088740623,0.7774844720496894,0.9915131969786981,0.9542002461187923,0.922629191616759,0.006532659951997311,0.002919971284347474,0.8512446252233943,0.9991207291516411,SEKER
35059,671.731,230.03161082652844,194.32181411994793,1.183766278985735,0.535143215814854,35314,211.27826485199577,0.7777062999112688,0.9927790677918106,0.9763793956788215,0.9184749178291198,0.006561271309122577,0.0028802949466948838,0.8435961746812084,0.9986207046689741,SEKER
35062,701.9479999999999,223.264100757669,200.25237136479777,1.1149136424005237,0.4421716406566185,35579,211.28730420331524,0.7787402274342573,0.9854689564068693,0.8942041219577548,0.9463559232599003,0.006367694391582597,0.003150503696623309,0.8955895334890981,0.9985049888781162,SEKER
35066,674.509,229.03917130401985,195.11797588589872,1.1738496684588282,0.5237079968016227,35356,211.29935607020485,0.7887089518668466,0.9917977146736056,0.9685467647471249,0.9225468065885215,0.006531659479382303,0.002918481451193104,0.8510926103466789,0.9990547784832078,SEKER
35069,692.225,234.23665190204719,191.21380747649394,1.2249986284638053,0.577589389799805,35563,211.30839451928412,0.752682864010989,0.986109158394961,0.9196841167471314,0.902114988424821,0.006679307990021021,0.0027287190746198555,0.8138114523407148,0.996917912945513,SEKER
35081,677.561,234.79527515743243,190.5792387615869,1.2320086735741422,0.5840987599054279,35395,211.3445444501803,0.7684438797862088,0.9911286904930074,0.9602515746906102,0.9001226464564579,0.006692947041345242,0.002710216000225326,0.8102207786637776,0.9981990268237694,SEKER
35083,687.873,229.64987565652868,194.93395000891897,1.1780907104484433,0.5286641771134221,35513,211.35056883752102,0.7676133380010502,0.9878917579477937,0.9317299615288824,0.9203164958539901,0.00654590188001393,0.0028966637179915706,0.8469824525409675,0.9978221592513533,SEKER
35083,685.5150000000001,227.9847726655864,196.19418427319565,1.1620363442991926,0.5093519837866206,35477,211.35056883752102,0.7827008455480445,0.9888942131521831,0.9381508213128752,0.9270380927919917,0.006498440061157438,0.00296059635733801,0.8593996254874136,0.998653599093489,SEKER
35085,693.747,245.9349428372114,181.85601125932044,1.3523608108093639,0.6732140808196331,35658,211.35659305314604,0.7354574992139189,0.9839306747433956,0.9160709446661364,0.8594004195371564,0.007009689121767462,0.0023586351461351426,0.7385690811006405,0.9988118813559891,SEKER
35087,678.15,237.29387575673965,188.49228233049325,1.2589049950632993,0.6074719662768192,35477,211.36261709707006,0.7689458689458689,0.989006962257237,0.9587482157027687,0.890720910613585,0.006763014100856148,0.002625951178692871,0.7933837406042943,0.998794754048751,SEKER
35091,688.22,225.85217951680926,197.98850297494795,1.140733810919248,0.48116745403242045,35466,211.3746646698738,0.780250811580024,0.9894264929791914,0.9310028921301042,0.9358982725873675,0.006436185332900438,0.003045950819107194,0.8759055766320185,0.9991751064368638,SEKER
35091,685.8470000000001,232.5036810716454,192.62691667872,1.2070155359410926,0.5600042264308951,35452,211.3746646698738,0.7623672032848856,0.9898172176463951,0.9374564943200117,0.9091239489010037,0.006625735404281593,0.002791941055906897,0.8265063544653548,0.9976060103937189,SEKER
35105,687.9219999999999,232.37556009207668,192.4946820973787,1.2071791156003113,0.5601702794404213,35508,211.41682576826256,0.7827201783723523,0.9886504449701475,0.9321814238979498,0.909806632351916,0.006619443386756208,0.002797677362174294,0.8277481082715343,0.9992402292830614,SEKER
35106,688.658,231.11262010296065,193.5514907516177,1.1940627230794347,0.546472660474056,35503,211.41983695356646,0.7874301863939169,0.9888178463791792,0.9302164569859727,0.9147913984938553,0.006583279784166828,0.002843874093699646,0.8368433027583434,0.9992433928824154,SEKER
35106,680.346,234.3642027179762,191.0105524361404,1.2269699224933137,0.5794385877496248,35445,211.41983695356646,0.810387811634349,0.9904358865848497,0.9530847947819232,0.9020995292868168,0.00667590163271168,0.0027271405214428367,0.8137835607394964,0.9984879524468729,SEKER
35122,679.818,231.7962315055011,193.1433258860201,1.2001255049438844,0.5529021551068831,35481,211.46801008707766,0.7843934250491335,0.9898819086271525,0.9550009059435813,0.912301329118282,0.0065997446473862855,0.0028200715387380762,0.832293715110984,0.9988569151091913,SEKER
35123,685.227,233.22488615599704,192.0042077126316,1.2146863286718148,0.5676676734352497,35457,211.47102054355608,0.7919146825396826,0.9905801393236878,0.9400101292562372,0.9067257959860662,0.006640232501665491,0.0027686428390774,0.8221516691065653,0.9986563925584586,SEKER
35128,669.6629999999999,228.4024535949652,195.96686802617927,1.1655156603536312,0.5136675095705473,35376,211.4860721831506,0.7855274044589549,0.9929895974672094,0.9843525709138902,0.9259360784196606,0.00650200562499901,0.00294816054101151,0.85735762131918,0.9992637341710426,SEKER
35130,678.016,239.18315016750552,187.16010607107827,1.2779601122723787,0.6226543090880713,35473,211.4920925390504,0.7801465689540307,0.9903306740337722,0.960302652931671,0.8842265535466757,0.006808515518574025,0.0025673578413738575,0.7818565979970323,0.9991815457571877,SEKER
35131,684.17,234.52302549370927,190.92454097642158,1.2283545336514488,0.5807286207820569,35466,211.4951026527352,0.7499893258187097,0.9905543337280776,0.9431316561048774,0.9018095438923469,0.006675671785423394,0.002723541814979355,0.8132604534553227,0.998972165041279,SEKER
35134,668.885,226.26643168264368,197.95577104704725,1.1430150810246797,0.48434137610654365,35360,211.50413273675105,0.7975755374452339,0.9936085972850679,0.9868122846283266,0.9347570082043901,0.006440098812621497,0.00303296370538438,0.8737706643872225,0.9987330467515494,SEKER
35145,681.083,243.76458477973685,183.7065283097566,1.326923909686614,0.6573072362093445,35444,211.53723974685238,0.7828091589451176,0.9915641575442953,0.9520797563284574,0.8677931617424871,0.0069359676989539576,0.0024263403403005576,0.7530649715670222,0.9992599163197518,SEKER
35149,682.373,238.92922131128103,187.42233415417653,1.2748172323728193,0.6202222042445493,35509,211.5492773750273,0.7825496482322558,0.9898617251964291,0.9485913692250637,0.885405628553978,0.0067976107801439875,0.0025769451255635836,0.7839431270750649,0.9993842075955274,SEKER
35162,673.468,230.2302104459655,194.64245677707342,1.1828365417194215,0.5340936001145812,35450,211.58839493691,0.7862877076857712,0.9918758815232722,0.9742030922346636,0.9190296726352917,0.006547699517830769,0.002881287785678549,0.8446155391841312,0.9990421234510423,SEKER
35165,676.0719999999999,232.8834611478344,192.38507847810706,1.2105068802117933,0.5635232263095329,35463,211.59742103960528,0.7858451774380978,0.9915968756168401,0.9667954245042846,0.9085978883888335,0.006622592382989745,0.002784163147661245,0.8255501227846472,0.9993341035905061,SEKER
35175,706.545,226.7972341163211,197.67915752911617,1.1472996796989896,0.49019667212102835,35707,211.62750526824092,0.7735529556650246,0.9851009605959615,0.8854505568170022,0.9331132546338733,0.00644768256194232,0.003015232770635605,0.87070034597342,0.9989542280491043,SEKER
35176,680.437,235.79133993642603,190.0240086537241,1.2408502568015105,0.5920530189576021,35499,211.63051345589105,0.7953692398136842,0.9909011521451309,0.9547297910844884,0.897533020139547,0.006703187967262509,0.0026832608942925096,0.8055655222408167,0.9995861851429604,SEKER
35208,678.5290000000001,232.28553715337583,193.46346937182093,1.2006687252513912,0.5534698696533943,35535,211.72675289399686,0.7676609105180534,0.9907978049810047,0.9609800941161653,0.9114934812071223,0.006597521505151552,0.002809149453678941,0.8308203662830784,0.997540030097998,SEKER
35221,674.6829999999999,237.28097805807587,189.12999126355538,1.2545920214601045,0.6038844633067586,35484,211.76583767245643,0.762755544005544,0.99258820877015,0.9723262523345698,0.8924686648106513,0.006736917692799065,0.002636409760960829,0.7965003176689068,0.9992829436378493,SEKER
35223,674.2869999999999,231.26896291058634,194.3159599708368,1.1901696749216868,0.5422513380653553,35537,211.77185007504335,0.7667842215256009,0.9911641387849284,0.9735239346028777,0.9156950738647927,0.006565850805172369,0.002847569182342191,0.8384974683002481,0.9979542592695637,SEKER
35237,676.073,233.92761460149063,192.0229568916297,1.218227332753293,0.571122485704072,35502,211.81393211456353,0.7782710486792119,0.9925356317953918,0.9687720629706176,0.9054678408763367,0.0066386926980585926,0.002752671900871421,0.8198720108612549,0.9987904929905858,SEKER
35246,683.2819999999999,240.09035873712875,186.98551349128581,1.2840051309553338,0.6272560683088074,35599,211.84098043989397,0.7812825571343072,0.9900839911233461,0.9486799909841153,0.8823385560093873,0.0068118469822711445,0.0025467462497794496,0.7785213274207308,0.9996253789663757,SEKER
35247,682.573,234.99053962492428,191.2353297428825,1.2288029619886192,0.5811448717286487,35605,211.8439855961936,0.7590120160213618,0.9899452324111782,0.9506788060240157,0.9015000601059275,0.006666965688567092,0.0027162580275450817,0.8127023583709911,0.9986510651814099,SEKER
35254,687.0450000000001,225.06364010173775,199.69203361784466,1.1270536737206418,0.46125197532613743,35676,211.8650204967621,0.7698052231635951,0.9881713196546698,0.9385294340585678,0.9413560555627317,0.006384059684056781,0.0030923766406366618,0.8861512233446248,0.9987399917426004,SEKER
35259,677.828,234.8896338185103,191.29719248745576,1.2278781029884331,0.5802855493928788,35577,211.88004414719452,0.7522401433691757,0.9910616409478034,0.9643636790306879,0.9020408465999212,0.00666183481716754,0.0027206861030766995,0.8136776889347027,0.9990970171331551,SEKER
35272,682.696,232.130230809024,193.59754767242157,1.1990349753902978,0.5517583530411866,35619,211.91910065376044,0.7799226091763405,0.9902580083663214,0.9510103277330053,0.9129319344368745,0.006581147391954638,0.00281990823718523,0.8334447169146539,0.9993293656349358,SEKER
35272,682.862,230.08115174289003,195.4208887104841,1.1773621195825954,0.5278198366090656,35637,211.91910065376044,0.7750895466631508,0.989757835957011,0.9505480131628092,0.9210624123203919,0.006523053746396293,0.002895922650107028,0.84835596738946,0.9988221799261976,SEKER
35277,676.8580000000001,238.55254852647937,188.77418207535422,1.263692661273218,0.6113871262367389,35527,211.9341204705423,0.7875560913535598,0.9929630984884735,0.9676234313636951,0.8884169202116806,0.006762268575175876,0.0025986001742992633,0.7892846241184078,0.9974131871542221,SEKER
35283,681.3729999999999,223.97501221467363,200.83652053491224,1.1152105783257638,0.44265574282123554,35589,211.95214284571585,0.7790805511393747,0.9914018376464638,0.9550047422667821,0.9463204879416004,0.00634795828627593,0.0031402686087291425,0.8955224658980286,0.9986961270978547,SEKER
35287,677.949,223.62088687145146,201.0973362343171,1.112003227187903,0.4373775719012347,35627,211.96415691118554,0.7893830253679924,0.9904566761164285,0.9647850219552229,0.9478728032817132,0.006337203130655807,0.0031555687086593513,0.8984628512011333,0.9990935900441049,SEKER
35288,676.973,232.62130570286203,193.38772204339386,1.2028752562205818,0.5557620677941555,35608,211.96716032115543,0.7949538184275737,0.9910132554482138,0.9675963312834402,0.9112112911613991,0.006592079622048913,0.002803358097183967,0.8303060171400242,0.9987545631087973,SEKER
35300,685.5989999999999,238.21698306609488,188.80762389723606,1.2616915469247751,0.6097591713873832,35640,212.0031979219918,0.7672245164094762,0.9904601571268238,0.9437223021909025,0.8899583698579967,0.006748356460795889,0.0026112986541924573,0.7920259000803032,0.9992923830768049,SEKER
35302,679.016,235.93409074834443,190.740547603881,1.2369372622244892,0.5885670054394576,35644,212.00920359324195,0.7816748593950666,0.990405117270789,0.9621641226696458,0.8985950394908313,0.006683306632721785,0.0026879873295226806,0.8074730449975287,0.998793497599315,SEKER
35304,686.4079999999999,234.61582284601258,192.04540997515045,1.221668473494735,0.5744314703712079,35737,212.01520909437178,0.7899046851926433,0.9878837059630076,0.9416057576377361,0.903669695089259,0.006645587549456509,0.0027337073453674436,0.8166189178227142,0.9976375867633976,SEKER
35313,691.2289999999999,233.15669478576115,193.11714605286107,1.2073329559351516,0.5603263394068723,35743,212.04223174460506,0.7738987508218278,0.9879696723834037,0.9287537444893974,0.9094408888384811,0.0066025739751865075,0.0027860630720702136,0.8270827302913264,0.9985642375655428,SEKER
35316,682.911,237.77663021573574,189.24162714061106,1.256471072503842,0.6054546022642155,35637,212.05123852943422,0.7605633802816901,0.9909925077868508,0.9515972006996629,0.89180857823176,0.006732830168074973,0.0026270237820303012,0.7953225402077532,0.9992997650813153,SEKER
35321,682.9029999999999,232.94445257447168,193.41110069849924,1.2044006353988925,0.5573338340549433,35670,212.0662489874112,0.7614910313901345,0.9902158676759182,0.9517542254010255,0.9103726087643758,0.00659506957828124,0.002794318289675685,0.8287782867884553,0.998181095212821,SEKER
35330,682.6819999999999,234.63951073677117,192.0162336880244,1.221977466332343,0.5747263018882293,35655,212.09326513468858,0.7468713005242685,0.9908848688823447,0.9526132046371681,0.9039111293264843,0.006641367414004279,0.002734892147283358,0.8170553297202803,0.998423201664925,SEKER
35337,677.215,228.98296825845944,196.63301405719093,1.1645194442875166,0.5124395229753016,35671,212.1142753147615,0.7652676715176715,0.9906366516217656,0.9682475407420914,0.926332106392045,0.006479977594545644,0.002943202436050123,0.8580911713327231,0.9992638539884068,SEKER
35338,680.836,227.46748380325639,198.04492148756546,1.1485650936903133,0.49190024069192917,35669,212.11727659917563,0.7876869580723536,0.9907202332557683,0.9580028639482271,0.9325169164953808,0.006436908817795472,0.0030025067726610283,0.869587799550053,0.9987781924621602,SEKER
35339,677.909,228.87115147358702,196.95805369957188,1.1620299204555173,0.509343946215008,35667,212.12027784112465,0.7646486065431886,0.9908038242633247,0.9663207839694118,0.9268108998245875,0.006476446743642633,0.002947685140736895,0.8589784440336616,0.9981586529934398,SEKER
35344,694.8199999999999,234.3666269052092,192.35218000026444,1.2184245944334344,0.5713134492082849,35807,212.13528341395636,0.7625458468176914,0.9870695674030218,0.9199854118035643,0.9051428789806135,0.006631015926471514,0.0027455438851338816,0.8192836313693137,0.9982353262771073,SEKER
35352,684.112,231.5229542315372,194.65442289916115,1.1894050532387617,0.5414134738033446,35760,212.15929012295803,0.7553846153846154,0.9885906040268456,0.9492255854460347,0.9163639554753853,0.006549076551016554,0.002848602311349912,0.8397228988944939,0.9987706592654128,SEKER
35354,687.7410000000001,235.01530838198147,191.82825470978182,1.2251339550450355,0.5777168096922498,35726,212.16529137577368,0.7543635044595229,0.9895874153277725,0.9392876021762533,0.9027722186970536,0.0066474884986700645,0.002723642491843704,0.8149976788512008,0.9984813296434955,SEKER
35354,681.2259999999999,237.28968515093158,189.8898462075666,1.2496175540189374,0.5996734073741308,35666,212.16529137577368,0.7685652173913043,0.9912521729378119,0.9573395287830301,0.8941193176636517,0.006711820024634598,0.0026460739502172175,0.7994493542193141,0.9990059465815583,SEKER
35364,683.341,222.2949086864787,202.88078942852107,1.0956922501762918,0.40870838460284836,35761,212.1952950939636,0.7921688096411451,0.9888985207348788,0.9516917141281839,0.9545665996032351,0.006285909645019757,0.0032193843900645276,0.9111973930780829,0.9983919219764958,SEKER
35376,681.4239999999999,236.60639297443686,190.5127968104755,1.2419448821058243,0.5930186658655048,35693,212.23129395673746,0.7707021633515609,0.9911187067492225,0.9573786499039169,0.8969803870839073,0.006688330873316284,0.0026707257928581633,0.8045738148131963,0.9992363315836087,SEKER
35377,687.7569999999998,237.87443389331912,189.49175805870422,1.255328655611639,0.6045013228810036,35712,212.23429358634726,0.7819849690539346,0.9906193996415771,0.9398549366679503,0.8922114500187488,0.00672398546777056,0.002628316723351854,0.7960412715445586,0.9992934192194102,SEKER
35384,679.656,235.75769620133033,191.32651806142078,1.232226972978445,0.5842985322154495,35698,212.25528980665945,0.7479812285967953,0.9912039890189926,0.9625836484521589,0.900311180617406,0.006662833376705017,0.002700283044396364,0.8105602219447076,0.9987941687036636,SEKER
35402,681.5139999999999,231.00848936988675,195.34593220216274,1.182561043200106,0.5337817066517658,35696,212.30927055292292,0.775900234510268,0.9917637830569251,0.9578292564983839,0.9190539756007713,0.0065252948807944956,0.00287173246096496,0.8446602100675832,0.9988622591671417,SEKER
35403,678.413,233.98655109494524,192.87931802818989,1.2131241103867207,0.5661270968736781,35713,212.31226908084932,0.7706691627846227,0.9913196875087503,0.9666329749368043,0.9073695393488616,0.0066092294747604795,0.0027635503202737047,0.8233194809381653,0.9987887128771684,SEKER
35408,684.2109999999999,241.9226540355379,186.69071315947372,1.295847286355826,0.6359917319206512,35765,212.32726108529408,0.7350938382328517,0.9900181741926465,0.9504541177581975,0.8776658884293808,0.0068324292260375594,0.0025007586612370777,0.7702974117125342,0.9981878106546039,SEKER
35410,704.7009999999999,228.55056820484077,197.43381105033154,1.1576060199059657,0.5037461000205132,35997,212.3332575906848,0.7659528444732857,0.9836930855349056,0.8960371483309817,0.9290427902169072,0.006454407461305867,0.0029660537078075944,0.8631205060540161,0.9991534937124127,SEKER
35412,675.129,228.00336842263917,197.942791770045,1.1518649726205552,0.4962891085194731,35693,212.33925392673297,0.7959183673469388,0.9921273078754937,0.9763078758460774,0.9312987584162775,0.006438590546217078,0.00298762899875987,0.8673173774277001,0.9990325072040896,SEKER
35414,680.978,237.13798322659952,190.36785632033155,1.2456828994679017,0.5962854027678346,35729,212.34525009345288,0.7647490714347412,0.9911836323434745,0.9596628517924752,0.8954501813846679,0.006696164884695305,0.0026556547696856983,0.8018310273418348,0.9988271990225029,SEKER
35432,681.365,233.74223189494586,193.21880911615852,1.2097281468825616,0.5627428659505976,35757,212.39920797652772,0.790645780336502,0.9909108705987639,0.9590602448624284,0.9086899113378423,0.0065969245849781515,0.0027744960284630596,0.8257173549671758,0.9988935256732119,SEKER
35437,685.657,228.03713201547083,198.23312431342683,1.150348272042168,0.4942814115253928,35804,212.41419384490283,0.781549115610251,0.9897497486314378,0.9472246346019941,0.9314894989579675,0.006435001044543015,0.0029884103896452357,0.8676726866689656,0.99812577580783,SEKER
35438,678.4119999999999,233.18003280462042,193.71057295238867,1.2037548041424295,0.5566696338361645,35726,212.41719089170888,0.7935953420669578,0.9919386441247271,0.9675914570320767,0.91095789093439,0.0065799433603651565,0.0027950856891004712,0.829844279055632,0.9989290376033279,SEKER
35438,677.4129999999999,234.42970458074274,192.61404616320047,1.217095581815005,0.5700238339991439,35725,212.41719089170888,0.767454954954955,0.991966410076977,0.970447430033106,0.9061018580030149,0.006615206969375889,0.002750624348141495,0.8210205770765159,0.9992605169390333,SEKER
35442,698.8829999999999,236.86749019481775,191.00325799066678,1.2401227742743115,0.591408965105346,36046,212.42917865609618,0.7295895261229363,0.983243633135438,0.9118410339366536,0.8968270761064693,0.006683242768320573,0.0026668700010649958,0.8042988044376789,0.9974292647047663,SEKER
35442,681.165,228.7551275093737,197.58655510864625,1.1577464235033041,0.5039257088927654,35791,212.42917865609618,0.7915577889447236,0.9902489452655695,0.9598943510202224,0.9286313315420284,0.006454351546452618,0.002960777070735184,0.8623561499215208,0.99838974835772,SEKER
35450,680.9929999999999,235.7961594600828,191.58571952360577,1.2307606226936436,0.5829532704740658,35744,212.45315215562587,0.7754566334901017,0.9917748433303492,0.9605960754676375,0.9010034456968813,0.006651513666010798,0.00270399608104374,0.8118072091576528,0.9991403462500619,SEKER
35454,677.1889999999999,235.5324638791981,191.8532648936914,1.2276698236525188,0.5800915851096383,35744,212.4651378909972,0.7816999228309999,0.9918867502238138,0.9715279836478944,0.9020630718658305,0.006643325545190898,0.002713394339901806,0.8137177856240185,0.9989767703799569,SEKER
35467,683.5149999999999,226.94747600584535,199.26107784025407,1.1389453397807434,0.4786509815596712,35845,212.5040868621637,0.7667214319685244,0.9894545961779886,0.9539776924940371,0.9363580093602378,0.006398834860739429,0.0030342292009836467,0.8767663216930673,0.9985889161690232,SEKER
35473,687.235,241.05014351587448,187.64466369111628,1.2846096381012437,0.627710838792899,35874,212.52206090284,0.7913487708026592,0.9888219880693538,0.9438375337754267,0.8816508374691934,0.006795313154113677,0.0025326532610556586,0.7773081992101301,0.9985376044804546,SEKER
35481,679.09,237.90188216637202,190.08448808386592,1.2515586335556688,0.6013260850362565,35754,212.54602392599188,0.7890102070315106,0.9923644906863568,0.9668320642238946,0.893418841374916,0.006705050087832136,0.002635131045277218,0.7981972261236971,0.9989906296352996,SEKER
35499,688.485,228.51975069106308,197.9982625631579,1.1541502825974008,0.4992841730948563,35887,212.59993085265464,0.7716502912790192,0.9891882854515562,0.9411026965013127,0.9303350376049967,0.006437357409816138,0.0029747117881861692,0.8655232821954908,0.9989439407405556,SEKER
35507,682.1419999999999,239.23241366649103,189.11616314188612,1.2650024709257914,0.612446176853882,35835,212.62388509974937,0.7819202818762387,0.9908469373517511,0.958902086844267,0.8887754039724899,0.006737612686695329,0.0025933068917855864,0.7899217187064626,0.9992529260016231,SEKER
35510,676.9749999999999,227.15161254900198,199.3230352394655,1.1396154602808621,0.4795968119606761,35799,212.63286724668328,0.7719565217391304,0.9919271488030392,0.9736778141932021,0.9360834592394246,0.0063968350478457335,0.003029724923968526,0.8762522426616474,0.9985906028429913,SEKER
35511,702.0,224.14210686629013,204.15132552774173,1.0979213888857748,0.4128213426235902,36641,212.63586121134497,0.7590740028215981,0.9691602303430583,0.9055210324723593,0.9486653988587289,0.00631190636327589,0.0031534979483613178,0.8999660389917913,0.988091963479897,SEKER
35517,678.8290000000001,232.99639503557412,194.23258197169838,1.1995742046487547,0.5523246096616988,35881,212.65382411411926,0.7716222381542072,0.9898553552019175,0.9685574021647175,0.9126914778301658,0.006560137259215984,0.0028079454759402083,0.8330057337038121,0.9992521904756028,SEKER
35532,676.181,231.10699672606953,195.88019718065797,1.1798384933874775,0.5306778062515107,35820,212.6987247341408,0.7916406737367436,0.9919597989949749,0.9765704767022556,0.9203474050863635,0.006504193310989235,0.0028785937082681846,0.847039346049203,0.9993696258826058,SEKER
35534,684.316,231.10546351139791,196.03701570781,1.1788868682629654,0.5295834947007378,35921,212.70471076734356,0.7776172969187675,0.9892263578408174,0.9535436388996027,0.9203794126522377,0.006503784080356782,0.002878813032165293,0.8470982632340778,0.9986330186550193,SEKER
35539,690.7909999999999,247.06248129419754,184.04221243603305,1.3424229040936368,0.6671518623344351,35853,212.71967511338235,0.8261041376104138,0.9912420160098179,0.9358833609328847,0.8609954615491763,0.006951869250519079,0.002356594213742359,0.7413131848082793,0.9951557983932332,SEKER
35544,683.3499999999999,232.2347035153484,195.02938088711267,1.190767783084801,0.5429047147115659,35949,212.7346384067875,0.7844625910395057,0.988734039889844,0.9565105549068438,0.9160329407561082,0.006533724496830644,0.002837820657516889,0.8391163485502836,0.9991927141134346,SEKER
35555,697.4069999999999,238.23861372252938,190.25462244327284,1.2522093322256265,0.6018773731808168,36021,212.76755394810252,0.756087187666135,0.9870631020793426,0.9186243280030876,0.8930859302090618,0.006700565707285315,0.002629445798619314,0.7976024787373852,0.9987652672812456,SEKER
35565,682.802,227.29570172194312,199.38391653348796,1.1399901540391657,0.48012412964907325,35922,212.7974727493399,0.8014286680036956,0.9900618005678972,0.9586125446386968,0.9362142404683953,0.006390994003147564,0.0030286503903657436,0.8764971040558144,0.9991980686674705,SEKER
35589,687.9229999999999,235.06390598553864,192.99444701585085,1.217982743131633,0.5708854877071733,35977,212.86926071553805,0.7799986849891511,0.989215332017678,0.9450308572639129,0.9055803774852358,0.006604959565751739,0.002740046542841259,0.8200758200863021,0.9988381969246377,SEKER
35598,694.4989999999999,245.39766796278627,185.34863654377733,1.323978813865329,0.6553802537392968,36045,212.8961749620747,0.7536360749444267,0.987598834789846,0.9274536468781421,0.8675558196191159,0.006893580200089507,0.002408875224628348,0.7526531001549959,0.9964967587952741,SEKER
35602,688.3779999999999,240.65562646764604,188.5903077767525,1.276076322822098,0.6211998480625671,35941,212.90813575732906,0.7809168677341523,0.9905678751286832,0.9441267343870584,0.8847004280864076,0.006759609754161172,0.002554384888962682,0.7826948474562729,0.9987783628338037,SEKER
35605,694.737,245.5544516561925,184.744494120404,1.3291570762382594,0.658756144732823,35968,212.91710591283046,0.7426217540932318,0.9899076957295374,0.9270005593893745,0.8670871347547041,0.006896628329060315,0.0024047368277886724,0.7518400992571226,0.9993135881272799,SEKER
35608,689.3040000000001,240.3894549753151,188.87973858838834,1.272711709428919,0.618577370046126,35997,212.9260756904369,0.7841444615723409,0.9891935439064367,0.9417504749701798,0.8857546422421136,0.006750995702519521,0.002563311245742781,0.7845612862534548,0.998520335779386,SEKER
35609,686.971,230.16938954782327,197.14094084791626,1.167537237865709,0.516140832760711,36002,212.92906553233732,0.7893290182430784,0.9890839397811233,0.9481844607745777,0.9250972336097548,0.006463798184386624,0.0029202301463071008,0.8558048916324215,0.9991840793284797,SEKER
35610,678.391,234.4285952606635,193.82601591913877,1.2094795125875337,0.5624931662929725,35888,212.9320553322565,0.7568061547616518,0.9922536781096746,0.9723479041133495,0.9083023984147293,0.0065832236804454795,0.002764013870514152,0.8250132469659496,0.9978366198186353,SEKER
35615,692.536,233.00359069749933,195.22464975740598,1.193515219451227,0.5458834504684759,36004,212.9470037021954,0.7433419602604775,0.9891956449283413,0.9331642756198855,0.9139215540186987,0.00654228810044923,0.002815432420884124,0.8352526068999533,0.9968866984214072,SEKER
35634,685.864,235.12304473512202,193.2178621002372,1.2168804797826887,0.5698144360802834,36006,213.00379794053623,0.7842852426543414,0.9896683886018997,0.9519155553654332,0.9059248028218406,0.0065982781819364095,0.0027414415111668804,0.8206997483677908,0.9986935035513292,SEKER
35647,683.5479999999999,233.60413276835962,194.4070018619092,1.2016240697662364,0.5544650185823574,35993,213.04264843259517,0.7713129652068548,0.9903870196982747,0.9587266865077996,0.9119815043848001,0.006553262063241216,0.0027962849216334102,0.8317102643399631,0.9994030727025387,SEKER
35647,679.754,236.15711476762084,192.34177047607997,1.2277994227831537,0.5802122961049417,35927,213.04264843259517,0.7650884271978022,0.9922064185709911,0.9694586866793143,0.9021225070531101,0.006624880488333404,0.002706573862415257,0.8138250177317887,0.9992138870175801,SEKER
35652,680.437,227.4768819749328,199.80969773622857,1.1384676747533449,0.47797462443338845,36002,213.05758904319276,0.7989780825601721,0.9902783178712293,0.9676491503224978,0.9366120512706474,0.006380480252859105,0.003028810468020051,0.8772421345854099,0.9987118131571125,SEKER
35672,690.775,241.45647783706127,188.25090175981444,1.2826311883760895,0.6262188261321301,36078,213.1173410114548,0.7793751365523268,0.9887466045789678,0.9394292977876801,0.8826325262446255,0.006768795633467741,0.002534024886085144,0.7790401763849695,0.9992212272293719,SEKER
35677,689.725,235.9739476838763,192.72726283629999,1.2243931876120167,0.5770184603257915,36120,213.1322763860894,0.7684371499956922,0.987735326688815,0.9424238247830194,0.9032025716313952,0.006614175734615475,0.0027151645468866813,0.8157748854015657,0.9988292123106506,SEKER
35680,686.068,230.90979066952167,197.0362234436228,1.1719154307461186,0.5214139096766952,35991,213.1412371085206,0.8040201005025126,0.9913589508488233,0.9525776407620205,0.923049804386894,0.006471686958226504,0.0028979961421068874,0.8520209413786833,0.9984964885205131,SEKER
35683,699.955,237.16407722863244,192.1409057803984,1.2343237181347104,0.5862084826730375,36188,213.15019745424777,0.787495586158192,0.9860450978224826,0.915231551768563,0.8987457120193011,0.006646416423188421,0.002674943640395057,0.8077438548730805,0.9970173982474045,SEKER
35684,678.241,237.69250295566894,191.41241131612574,1.241782083624189,0.5928753108421431,35953,213.153184152453,0.7685879210821056,0.9925180096236753,0.9747995401078818,0.8967602322409274,0.0066610386435284425,0.002657217347395735,0.8041789141288022,0.9986149675935017,SEKER
35690,699.055,235.79525203059075,192.90219302835956,1.2223565130538732,0.5750874651850387,36122,213.1711034629177,0.7547688533604027,0.9880405293173136,0.91776970807954,0.9040517212588406,0.006606759653420867,0.002722333830954568,0.8173095147110725,0.9990436084879798,SEKER
35690,691.225,238.38929085127242,190.76197892291708,1.2496687872356396,0.5997171860802103,36059,213.1711034629177,0.7525725371120108,0.9897667711251005,0.9386799415641196,0.8942142606393843,0.0066794421645074925,0.002634427934317461,0.7996191439308405,0.9992590858464538,SEKER
35693,680.082,229.62268467602257,198.08939492550064,1.1591871678056327,0.5057613158529266,35997,213.18006255330764,0.7795444121693931,0.991554851793205,0.9697735957313328,0.9283928669943301,0.006433269399490729,0.002948076040246556,0.8619133154859522,0.9991188550721236,SEKER
35699,694.117,236.6649656454806,192.47982181388426,1.2295572773042183,0.5818433631865089,36104,213.1979796046402,0.7584880805677134,0.9887824063815643,0.9311090604296164,0.9008430082718983,0.0066294564454321015,0.002693110252437303,0.8115181255523634,0.9978080169371866,SEKER
35702,689.3860000000001,233.52723742888026,194.80381879914324,1.19878161972617,0.5514918337092707,36067,213.20693756567766,0.7839701361440492,0.9898799456566945,0.9440119470449343,0.9129853113198795,0.006541012756396848,0.0028033667655301014,0.8335421786858576,0.9992350430751128,SEKER
35703,684.558,235.50780251354715,193.07484936199117,1.2197746277766064,0.5726161895620526,36029,213.20992346905317,0.765304810083169,0.9909517333259319,0.9574014339965561,0.9053199987154934,0.006596302902096383,0.0027333094917477976,0.819604300074221,0.9997325300471389,SEKER
35703,677.7339999999999,230.11387721360273,197.71626640785132,1.1638591067612072,0.5116221897908286,35987,213.20992346905317,0.7855445544554456,0.9921082613165866,0.9767783542102545,0.9265409198730831,0.006445225253160876,0.002930058423803812,0.8584780761992591,0.9991475269393493,SEKER
35704,683.5649999999999,241.10435198615656,188.65469759888387,1.2780193393264487,0.6226998786816219,35994,213.21290933061312,0.7663118131868132,0.9919431016280491,0.9602119405127557,0.8843179626341009,0.006752866681216574,0.0025474268686218153,0.7820182590373271,0.9994344587561046,SEKER
35720,685.105,236.70301303059384,192.34166468206544,1.2306382676985574,0.5828406612679082,36074,213.26067743008792,0.7755775577557755,0.9901868381659922,0.956328371176292,0.9009630874556042,0.006626624104999828,0.002693395261384442,0.8117344849575346,0.9989515203993211,SEKER
35720,685.9300000000001,240.81202232968602,189.08915724627852,1.2735369168526212,0.6192235150463686,36024,213.26067743008792,0.7936366868112336,0.9915611814345991,0.9540293131378076,0.8855898279784443,0.006741657959957615,0.0025578610900365605,0.7842693434188905,0.9987959615997235,SEKER
35725,684.6729999999999,235.15539485677533,193.90512625689155,1.2127342860716026,0.5657410884896694,36053,213.2756027670856,0.7657271460722324,0.9909022827503953,0.9576695917646001,0.906956027511017,0.006582376343086783,0.002747308295811514,0.8225692358385646,0.9975579149691454,SEKER
35730,698.1690000000001,242.2163347048886,187.99091286471773,1.2884470372203185,0.6305752241370808,36142,213.29052705965952,0.7862943157060804,0.9886005201704389,0.9211317613421605,0.8805786253826701,0.0067790745789221545,0.002514332634686521,0.775418715480833,0.9990859465664644,SEKER
35734,700.1619999999999,249.46979943467434,182.91504124945104,1.3638561253935317,0.6799967024778153,36085,213.30246574188095,0.7664950664950665,0.9902729666066232,0.915997786114641,0.8550231980995194,0.0069813007061810695,0.0023015886086611066,0.7310646692883302,0.9970670272676857,SEKER
35735,684.121,235.48911954100367,193.43232904404923,1.2174237921075597,0.5703429789072334,36043,213.30545030802904,0.7502309371850857,0.9914546513886191,0.9594841540201919,0.9057974768591719,0.006589873220680108,0.002736410502698966,0.820469069084442,0.9988585653917407,SEKER
35736,684.029,235.66157331110864,193.3776575259347,1.21865977862258,0.5715409199401071,36088,213.30843483241767,0.7529709228824273,0.990246065174019,0.9597691244888744,0.9051472916665058,0.006594514587841634,0.0027304839065980784,0.8192916196112104,0.9984377437827325,SEKER
35738,684.4490000000001,237.85002756017764,191.88928221550202,1.2395170007101242,0.5908712600204109,36051,213.31440375592373,0.7991681388224244,0.991317855260603,0.9586452437646629,0.8968441414283788,0.0066553815983037,0.0026559544727134034,0.8043294140144057,0.9969799828420679,SEKER
35758,682.303,239.435320549712,190.4997503899915,1.2568799699712965,0.6057948078141503,36049,213.37408380738265,0.7458906967042136,0.991927654026464,0.9652249122330704,0.8911554206685288,0.0066959930798621845,0.002605005061415547,0.7941579837869026,0.9981612628145475,SEKER
35762,690.56,236.8214406664486,192.70757853891885,1.2289160730573998,0.5812497474111995,36157,213.38601781470803,0.7911596831998584,0.9890754210802888,0.9423859997434605,0.9010418026940887,0.006622153142062766,0.002692518789060032,0.8118763302022131,0.9977278715203565,SEKER
35764,674.477,222.12292029327193,205.0983638560753,1.0830067881435823,0.3839467260789794,36032,213.39198456809092,0.7745148995148995,0.9925621669626998,0.9879197347730718,0.9606932246629324,0.006210796339706742,0.00326336733744238,0.9229314719132636,0.9995410490734126,SEKER
35772,693.3159999999999,245.51020839419022,185.6779933882196,1.3222364369312853,0.6542314537592533,36140,213.41584991341725,0.7464162754303599,0.9898173768677366,0.9351701599556234,0.8692748513770866,0.006863194912059438,0.0024173222932819833,0.755638767236656,0.9991331111981449,SEKER
35777,685.8629999999999,221.3199451520588,206.19312170773551,1.0733624056856974,0.36335238213755083,36174,213.43076439911354,0.7971702317290552,0.9890252667661856,0.9557383996979043,0.9643539548705158,0.0061860956802431396,0.0033002151924568404,0.9299785502744048,0.9982040139586326,SEKER
35781,688.2130000000001,240.17844945418443,189.85095944678707,1.2650894688867955,0.6125163381089792,36108,213.4426952373139,0.7757062024410866,0.9909438351611831,0.9493286638108316,0.8886837920819763,0.006712457713707958,0.002582559663875212,0.7897588823092013,0.9991156449691768,SEKER
35789,685.127,233.6187674102795,195.22443658143996,1.1966676482778473,0.5492563533175248,36146,213.46655491323864,0.7770757338891784,0.9901233884800531,0.9581141673608566,0.9137388972622662,0.006527669602679022,0.002806896370846299,0.8349187723700624,0.9991202838351099,SEKER
35795,695.242,249.73614144115294,182.70408558846742,1.3668886529646203,0.6817464978391669,36189,213.484447920206,0.791907258688967,0.9891127138080632,0.9305939618959251,0.8548400191027651,0.006976844292251793,0.002298148957956686,0.7307514582596156,0.998855876432418,SEKER
35795,684.9549999999999,227.56501196074035,200.51361541781827,1.134910522093744,0.4728801976114232,36124,213.484447920206,0.7680176797476774,0.9908924814527738,0.9587561223601663,0.9381250926088606,0.006357452492268204,0.0030374273282634747,0.8800786893823833,0.9988105648505385,SEKER
35804,683.756,236.58473368713248,192.93280205264494,1.2262545879708748,0.5787692723026953,36096,213.51128461909866,0.785347663961395,0.9919104609929078,0.9623634310463529,0.9024727897339863,0.006607773815415386,0.002703780286142199,0.814457136210244,0.9987317999834315,SEKER
35809,681.549,232.7871235420604,196.04782675455326,1.1873996636213866,0.5392020720477384,36094,213.5261924388234,0.7651495726495726,0.992103950795146,0.9687414606825817,0.9172594651707318,0.006500799339329789,0.002838672766441781,0.8413649264452969,0.9990364306439783,SEKER
35822,691.654,235.4053042242631,194.23792333566138,1.211943065399544,0.5649556544989531,36203,213.56494789993744,0.749539671911617,0.9894760102753916,0.9409832823418236,0.9072223270571718,0.006571528787456398,0.0027460035650367855,0.8230523507110301,0.9974925889050267,SEKER
35835,687.914,237.70417950398124,192.17675908498683,1.2369038828408003,0.5885370367314676,36190,213.60369632940473,0.7908850143456191,0.9901906604034264,0.9515880438969933,0.8986114454324399,0.00663329648399557,0.0026680683748008154,0.807502529862179,0.9988030145902983,SEKER
35838,689.511,235.5032280998483,193.965675317458,1.2141489864864337,0.5671389179251708,36193,213.61263727649344,0.7889314489499406,0.9901914734893488,0.9472644329999216,0.9070475976062897,0.006571327308997385,0.0027438045482746235,0.8227353443233417,0.9989232844567524,SEKER
35838,684.103,241.7568645839754,189.1084506827811,1.2784032850520737,0.6229950540978081,36131,213.61263727649344,0.7835497835497836,0.9918906202430047,0.962300340064557,0.8835845784320803,0.0067458246716885824,0.0025363391275294283,0.7807217072429973,0.998077195250911,SEKER
35842,679.664,232.110748502132,196.7334530536646,1.1798234865466284,0.5306605873278969,36127,213.6245579571733,0.771459319845028,0.9921111633957982,0.9750200922693698,0.9203561633217994,0.006475942985941967,0.002866199918172571,0.8470554673644228,0.9993759348042771,SEKER
35845,683.8879999999999,229.29529695231355,199.45790625892673,1.1495924190372948,0.4932748376186368,36169,213.63349803116532,0.7613636363636364,0.991042052586469,0.9630935671117556,0.9316959434872081,0.00639685582235496,0.0029733302106047105,0.8680573311105186,0.9979121271343993,SEKER
35853,678.6360000000001,230.97217390594238,197.89479511290148,1.1671462797905818,0.515664436436909,36172,213.657336399642,0.7912822776429045,0.9911810239964614,0.9782764001093184,0.9250349632447438,0.006442199367024862,0.0029096886186684053,0.8556896832252048,0.9987150304314791,SEKER
35864,681.39,231.33933160197518,197.81374032762437,1.1694805993700177,0.5184953422139715,36158,213.69010981414624,0.787008997147246,0.991869019304165,0.9706822287478768,0.923708512229149,0.006450460952542248,0.002896745203186586,0.8532374155645879,0.997844604159399,SEKER
35872,684.086,232.55203033329644,196.59174620087035,1.1829185854816264,0.5341864050517549,36214,213.71394186795524,0.7697854077253219,0.9905561385099685,0.963261161137032,0.9189940916089091,0.006482828677890735,0.0028522998841422563,0.8445501404120842,0.9990340574645714,SEKER
35901,686.097,236.85118343593084,193.25486592902817,1.2255897531858948,0.5781454602745999,36225,213.80031079382712,0.7655940118994307,0.991055900621118,0.9583968310922402,0.9026778236540285,0.0065973422310222785,0.00270196593049447,0.8148272533167734,0.998643932281645,SEKER
35901,684.781,238.02645331631712,192.27400921816755,1.2379543875128523,0.5894783109857291,36216,213.80031079382712,0.7783414634146342,0.9913021868787276,0.9620840308068827,0.8982207977938675,0.0066300786417179776,0.002662139866757715,0.8068006015894519,0.9987823445856708,SEKER
35915,685.086,238.63706965649348,191.83743848971258,1.2439546291653105,0.5947809181269333,36222,213.841993652237,0.7993901353276354,0.9915244878802938,0.9616024242209524,0.896097131766042,0.006644495883516455,0.0026427869180848536,0.8029900695593274,0.9988832142020999,SEKER
35923,684.6650000000001,229.98182987540386,199.11535866653605,1.155018032840755,0.500412097537183,36239,213.86580878092983,0.7710121909340659,0.9912801125858881,0.9629998237009042,0.9299248070893029,0.006402077495626865,0.002953194308765441,0.8647601468400775,0.9988135636823089,SEKER
35932,688.7270000000001,242.49623023870546,188.79116159512148,1.2844681297038631,0.6276044691698207,36273,213.89259763120336,0.7427803617571059,0.9905990681774323,0.9519125165040085,0.882045042187478,0.006748754042043456,0.002519801999434179,0.7780034564475101,0.9993206446062742,SEKER
35954,710.093,251.6607689463733,182.01482191474545,1.3826388768726183,0.6905814275538084,36380,213.95806736696807,0.7945635359116022,0.9882902693787795,0.8960383862121613,0.8501844298686088,0.006999520747242958,0.0022558003324967737,0.7228135647910112,0.9993901354109374,SEKER
35955,683.377,242.6043169513601,188.87369212959385,1.284479136379139,0.6276127446210192,36232,213.96104278805703,0.7436247440590681,0.9923548244645617,0.9674943583891721,0.8819341942334613,0.006747443108089559,0.0025180463474186706,0.7778079229582249,0.9990780491502326,SEKER
35955,693.6129999999999,253.66406288607777,180.88373754493966,1.4023596942928946,0.7010787927240308,36295,213.96104278805703,0.7765826475733817,0.990632318501171,0.9391494500947296,0.8434818884224383,0.00705504277252337,0.002202837497296258,0.7114616960966829,0.9977252066392484,SEKER
35967,684.169,231.49329479699148,197.95252371789164,1.1694384615520226,0.5184445271035759,36223,213.9967446142338,0.7862154895402977,0.9929326670899704,0.9655778496686306,0.9244187603874172,0.006436269213362012,0.0028992720334048167,0.854550044556209,0.9993436894250254,SEKER
35969,704.8,222.2541533320922,206.81454601889976,1.074654358749899,0.36621122884778157,36555,214.00269433953179,0.81179470975896,0.9839693612364929,0.9099267593721799,0.9628737692013742,0.006179047327757019,0.003276262623582868,0.9271258954160614,0.9963398846187734,SEKER
35972,685.989,233.49296872674606,196.29221158217203,1.189517234763036,0.5415365834619739,36336,214.0116186173388,0.7615700554685184,0.9899823866138265,0.9605946096382988,0.9165655813293203,0.006490964325774104,0.002825811340687655,0.8400924648775548,0.999304465766412,SEKER
35975,685.0859999999999,235.36379237104452,194.90266966132805,1.2075965546291572,0.5605935017936454,36307,214.02054252301923,0.767614048563991,0.9908557578428402,0.963208887967389,0.909318040667962,0.006542426473135359,0.002759191498176856,0.8268592990842213,0.9985124407371857,SEKER
35977,702.354,247.1838982123726,185.5014699929911,1.332517193646563,0.6609165978877135,36371,214.02649158675885,0.7570917508417508,0.9891671936432872,0.916479362660125,0.8658593586984944,0.006870608950506507,0.0023821242771359156,0.7497124290457677,0.9990047019940145,SEKER
35978,687.586,243.53024520921974,188.4149582664382,1.292520760824323,0.6335741625677259,36297,214.0294660566196,0.7469274206942368,0.9912113948811196,0.9562970822043936,0.8788619494582464,0.006768865562544325,0.002491026222602985,0.772398326205549,0.9983408722466298,SEKER
35996,686.723,235.34348189806929,194.80659856966264,1.2080878349401019,0.561090618350306,36312,214.08299944714648,0.7791341991341991,0.9912976426525666,0.9591817803810493,0.9096619023418246,0.006538045391100936,0.0027615169900502947,0.8274847765721474,0.9996742921749393,SEKER
36000,691.429,221.69797486467172,207.23462388830407,1.0697921549256322,0.3552771394912305,36450,214.09489393833252,0.7794063521617701,0.9876543209876543,0.9462746006038977,0.9657052305913923,0.006158277079574215,0.0033038271879593335,0.9325865923915746,0.9976738203293347,SEKER
36006,693.059,229.38339253024947,199.92675420187877,1.1473371507778616,0.49024728389113803,36489,214.11273443617094,0.7723294723294724,0.9867631340952068,0.9419857347336319,0.9334273596460793,0.006370699120431303,0.002983245281845927,0.8712866357358512,0.9996595261560002,SEKER
36013,692.4889999999999,251.2193469974759,182.6927204097825,1.37509226658833,0.6864002899070621,36327,214.13354647169933,0.7766778812974465,0.9913562914636497,0.9437205383166793,0.8523768134539845,0.006975796156873238,0.002271433642136569,0.7265462321139687,0.9990681050988084,SEKER
36022,683.433,240.3551824038649,191.07430875412683,1.257914703295629,0.6066533819097132,36323,214.16030183124516,0.7924237757930397,0.9917132395451917,0.969138385971377,0.8910159526803758,0.0066724552330205125,0.0025942232672692945,0.7939094279309177,0.998670342479323,SEKER
36029,688.635,238.66050519510193,192.5751141679225,1.239311248633059,0.5906883366164773,36371,214.18110924463713,0.77495052912329,0.9905969041269143,0.9547372959857102,0.8974300505630238,0.00662412237905859,0.002650394620948956,0.8053806956535513,0.9981173555553643,SEKER
36032,741.973,238.76822820283184,192.4767408126396,1.2405043185724618,0.5917469820967889,36713,214.1900260887453,0.7717449506307695,0.9814507122817531,0.8224737183214886,0.8970625099533447,0.006626560507405413,0.002647029361789588,0.8047211467637945,0.9982600578070708,SEKER
36036,681.481,236.17187033690863,194.55005541575156,1.213938848962092,0.5669318130705109,36286,214.20191463681252,0.7806589978553324,0.9931102904701538,0.9750770578637318,0.906974714352073,0.00655377595562517,0.0027355967013702374,0.8226031324740245,0.9985898997881286,SEKER
36044,691.115,233.58022441317493,196.66807115422984,1.187687574512276,0.5395208068605967,36384,214.2256897536666,0.7895382458599842,0.9906552330694811,0.9482922625057684,0.9171396692158642,0.0064804190548544815,0.0028282953985777287,0.8411451728493848,0.9990176701541947,SEKER
36059,692.057,237.05324708256862,193.85912916605966,1.2228118846005385,0.5755206090463448,36417,214.27026098739233,0.7916703258101344,0.9901694263668067,0.946106031141815,0.9038908499437652,0.0065740383006342,0.0027069233165400827,0.8170186686120625,0.9990601379193389,SEKER
36075,702.685,238.1659954042711,193.08095566208206,1.233503297037197,0.5854630526560325,36522,214.31779341977415,0.7558139534883721,0.9877608017085592,0.9181102542933074,0.8998673091680608,0.006601967994574389,0.002670343169084719,0.8097611741093664,0.9988430780766152,SEKER
36076,693.745,243.52621854276308,189.1972144345256,1.2871554122539093,0.6296154171794358,36427,214.32076384677646,0.7591271594806726,0.9903642902242842,0.9419514307955499,0.8800726473282869,0.006750366408214965,0.0024979354008688084,0.7745278645754194,0.9969377328297141,SEKER
36082,683.7639999999999,234.15349134607652,196.33165088924943,1.1926426039078253,0.5449413644918412,36409,214.33858554430682,0.7860830918716368,0.9910187041665522,0.9698130037473851,0.915376423866841,0.006489482050498213,0.002810533000542503,0.8379139973712467,0.999331931675658,SEKER
36085,689.809,237.31039868389047,193.8350869618133,1.2242902067087682,0.5769212089689724,36414,214.34749583740964,0.7559284397519692,0.9909650134563629,0.9529691923411027,0.903236845187435,0.006576427842147443,0.0027000785752786765,0.8158367985041504,0.9988210026812662,SEKER
36092,690.636,236.30096631298065,194.6810894620507,1.2137848979884764,0.5667799675560958,36433,214.3682850810294,0.7696671144947007,0.9906403535256498,0.9508727192208236,0.9071832774356859,0.006547184038373619,0.002735359773593926,0.8229814988589527,0.9989225146389173,SEKER
36100,681.5899999999999,236.75184849247827,194.34421258682886,1.2182088951411536,0.5711046287637737,36350,214.3920417481474,0.7699526511112059,0.9931224209078404,0.9764963985415546,0.9055559359442921,0.006558222949930146,0.0027203642964247587,0.8200315531239429,0.9989697323120026,SEKER
36104,698.492,247.96825777730464,185.6219019877653,1.3358782294648004,0.6630543900065636,36456,214.40391909458725,0.7559463986599665,0.9903445249067369,0.9299129842275188,0.8646425998892937,0.006868165792635294,0.0023679201240847637,0.7476068255433173,0.9987116824426063,SEKER
36105,712.899,247.7712990136734,185.70467735497084,1.334222177614102,0.6620039373774027,36668,214.4068883283908,0.7427789664252797,0.9846460128722592,0.8927322054910996,0.8653419067579681,0.006862520399215438,0.0023736372895014532,0.748816615591516,0.9990877354881345,SEKER
36109,690.918,236.91838652745312,194.40386100023687,1.2186917755052429,0.5715718502343194,36461,214.4187648524307,0.771559829059829,0.9903458489893311,0.9505441883384584,0.9050321842690109,0.006561200435554935,0.002715308394727037,0.8190832545627372,0.998210025789675,SEKER
36109,708.201,234.77340947403985,196.36276148086483,1.1956106529746378,0.5481307165568886,36550,214.4187648524307,0.7688655140107317,0.9879343365253078,0.9047159646881882,0.9133008943934093,0.0065017975982176145,0.002790414630163024,0.8341185236998017,0.9972809927789607,SEKER
36112,723.0769999999999,225.32877595434843,204.66633881869356,1.100956694954899,0.41831734834262185,36709,214.42767181377548,0.7922425518845159,0.9837369582391239,0.8679452100880376,0.9516213404417485,0.006239720202546202,0.0031564692964538097,0.9055831755841501,0.9970078599978878,SEKER
36115,688.0889999999999,228.0140680094677,201.8461467277989,1.1296429072632124,0.4651431129733378,36464,214.43657840515547,0.7841540733020671,0.990428916191312,0.9585356126617259,0.940453281138125,0.0063135558080982335,0.0030465105781367456,0.8844523740034653,0.9991153511051246,SEKER
36120,683.177,229.65960220264034,200.4695549590914,1.1456083805319246,0.4879015886743134,36437,214.45142190210368,0.7635395087303936,0.9913000521447979,0.9725034080205449,0.9337794712057469,0.006358239263638991,0.0029819057806469216,0.8719441008452844,0.9989064692837314,SEKER
36120,682.617,225.73795489601628,203.97960592838507,1.1066692371945768,0.42835114655016177,36472,214.45142190210368,0.7608214849921011,0.9903487606931345,0.9740996920176339,0.9500016158155078,0.006249666525360362,0.003140031343005526,0.9025030700520758,0.9987723841002943,SEKER
36128,690.3539999999999,241.89722623025992,190.4901445687506,1.2698674085102382,0.6163353633003174,36465,214.4751693604459,0.7767290864919485,0.9907582613464967,0.9525989383455559,0.886637572091417,0.0066955609563291605,0.002552414804113094,0.7861261842441629,0.998276020348177,SEKER
36136,711.044,234.6393276863634,196.27783029835493,1.1954448820312336,0.5479536993828671,36663,214.49891418967565,0.7755837912087912,0.9856258353108038,0.8981667829474083,0.9141643743387768,0.006493229125701887,0.0027972910821447605,0.8356965033102074,0.9990291078135853,SEKER
36137,703.387,240.49365440460232,191.50257750891598,1.2558246344930026,0.6049156920683291,36540,214.5018821085134,0.7812391905914908,0.9889709906951286,0.917853323672656,0.8919232511126434,0.006655053114663706,0.0025980124661761765,0.7955270858753475,0.9990425118486917,SEKER
36140,693.003,236.5060994091041,194.8376484507631,1.2138624197616044,0.566856441434119,36473,214.51078561864617,0.7643824027072758,0.990869958599512,0.9456442428941396,0.9069989575515732,0.0065441643444688466,0.0027318768105634187,0.8226471089996406,0.9985804103401918,SEKER
36144,690.759,222.62023242222045,206.92003480530752,1.0758756764741768,0.3688840429610407,36563,214.52265639066593,0.7832871012482663,0.988540327653639,0.9519036089764772,0.9636260552625932,0.006159258311814421,0.0032759881193191423,0.9285751743809462,0.9990314438942272,SEKER
36147,710.044,241.69602195051255,190.86823847016706,1.2662977553926027,0.6134884632681726,36675,214.5315590386224,0.7861461505002175,0.9856032719836401,0.9009726325786044,0.8876089780350125,0.006686475280120412,0.0025601402156360136,0.7878496978883593,0.9976523040227695,SEKER
36152,694.1999999999999,248.93547423614388,185.0490032819756,1.3452408271381975,0.6688900840866989,36582,214.54639596428927,0.7615757320412893,0.9882455852605107,0.9426988421624939,0.8618554531957442,0.006885800902747949,0.002343537781948056,0.7427948222032416,0.9992379210146591,SEKER
36154,679.6959999999999,234.96809463559833,196.13597237237207,1.197985722830598,0.5506526428880432,36386,214.55233044727126,0.7842856523059569,0.9936239212884076,0.9834149121313596,0.9131126112249879,0.006499089855495888,0.0027869531502567177,0.8337746407781157,0.998850115710393,SEKER
36154,691.4789999999999,232.05728915070634,198.68015022904981,1.1679943310047705,0.5166966544634404,36497,214.55233044727126,0.7791810344827587,0.9906019672849823,0.950185124709949,0.9245662191112354,0.006418578557025678,0.002893148394430928,0.8548226935216446,0.9984280600475095,SEKER
36156,687.2389999999999,238.86779059000136,193.07613684125266,1.237168893566576,0.5887748600856219,36461,214.55826476611088,0.7627365356622998,0.9916348975617784,0.9619990591741748,0.8982302060740539,0.00660658785789361,0.0026528188818153433,0.8068175031038374,0.998169517625122,SEKER
36156,683.782,238.97981067537967,192.87491789263396,1.2390403754230528,0.5904472919605571,36404,214.55826476611088,0.7804014677314914,0.9931875618063949,0.9717508147084789,0.8978091670578733,0.006609686101210855,0.002649090160263007,0.8060613004531524,0.998742496327468,SEKER
36166,684.301,238.5692528988332,193.2829525913991,1.2343005407371312,0.5861874572196174,36460,214.5879338986512,0.7873470631776026,0.9919363686231486,0.9705457064610568,0.8994785844831754,0.0065965064673680586,0.002663526771952205,0.809061723943857,0.9986253233536182,SEKER
36166,693.373,226.82992223801713,203.3922504292431,1.1152338486806195,0.44269364237336223,36553,214.5879338986512,0.7754288164665523,0.9894126337099554,0.945314870259395,0.9460300994746179,0.006271910696179205,0.0030988420909713586,0.8949729491119555,0.9981041265031702,SEKER
36169,685.632,238.456574182716,193.31378530959836,1.2335207952232687,0.5854789768495343,36452,214.59683383854036,0.7915134803921569,0.9922363656315154,0.9668613678222745,0.8999409413393097,0.00659284398746761,0.002667525628332619,0.8098936978986827,0.9990207182782969,SEKER
36186,685.681,236.9992929267507,194.91515652301166,1.215910025441098,0.5688673734313708,36484,214.6472598608857,0.7964344668207329,0.9918320359609691,0.9671775605802626,0.9056873428193165,0.006549474739588535,0.0027183127859603533,0.8202695629431143,0.9973739851467206,SEKER
36210,690.479,236.32019454324657,195.2178041591907,1.2105463206139684,0.5635626803331197,36567,214.7184293787104,0.7613380711086815,0.9902370990237099,0.9544154028446393,0.9085911163610563,0.00652637930249231,0.002743633003215091,0.8255378167302304,0.999351766570469,SEKER
36236,714.592,234.89351347451944,196.58139886997787,1.1948918606987928,0.5473622123133132,36704,214.79550307914585,0.7760976654529878,0.9872493461203139,0.8917308985598953,0.9144377803452892,0.006482324579824468,0.0027959356969589674,0.8361964541228195,0.9991643369765486,SEKER
36244,701.3959999999998,237.53230780150517,194.5318785543985,1.2210456690525513,0.5738360677904546,36667,214.81921250060765,0.7454852112386359,0.988463741238716,0.9258047744337214,0.9043789221301306,0.006553700137995397,0.0027043821263418827,0.817901234793257,0.9986947604570402,SEKER
36246,684.492,238.56638018425696,193.57122687550068,1.232447528669619,0.5845001922387528,36557,214.82513944711104,0.7874600795150883,0.9914927373690401,0.972149812552053,0.900483711414788,0.006581867797391628,0.0026695149858382084,0.8108709145233512,0.9993558546743783,SEKER
36253,698.598,230.52489719421646,200.53061114153442,1.149574600515789,0.4932510598227577,36730,214.8458824722593,0.7881429627375103,0.9870133405935203,0.9334673648959072,0.9319855906551054,0.006358781264839226,0.002959309852103169,0.8685971411887459,0.9985172115912088,SEKER
36253,681.763,237.31202763962247,194.78112457819407,1.2183522820988466,0.5712434638436921,36493,214.8458824722593,0.7821574973031283,0.9934233962677774,0.9801373953710246,0.9053307774122606,0.0065459969558277235,0.002712593401110453,0.8196238165298882,0.9985905473317557,SEKER
36257,690.403,221.79250639088738,208.3149927148144,1.0646977613105546,0.3432784410341085,36639,214.85773473036244,0.7887443438914027,0.9895739512541282,0.955864628375084,0.9687330659932076,0.006117232710673453,0.003323160065993113,0.9384437531486004,0.9991589630931896,SEKER
36261,701.08,232.4588159658658,198.92962962119853,1.168547975525383,0.5173682105791304,36685,214.86958633469217,0.7666335440495571,0.9884421425650811,0.9270741782661591,0.9243339962905239,0.006410711672757668,0.0028867004018487486,0.8543933366984103,0.9983996039013042,SEKER
36265,684.1370000000001,240.9473324969239,191.89502533649232,1.2556205252033878,0.6047452613009466,36514,214.8814372853567,0.7498345877098669,0.9931806978145369,0.9736691009343029,0.8918191168939379,0.006644073693559187,0.0025925152151832706,0.795341337257483,0.9986469076032057,SEKER
36272,724.509,242.87159338271175,190.57934536616057,1.2743857048941056,0.6198861142280225,36736,214.90217487646285,0.7806473829201102,0.9873693379790941,0.8683479779781376,0.8848386584997806,0.006695842340723196,0.0025318696137097314,0.7829394515756913,0.9977668448856919,SEKER
36278,689.9429999999999,246.5483425816633,187.74921273510085,1.3131791020052015,0.6481522822165605,36580,214.9199483619476,0.7461538461538462,0.9917441224712958,0.9576940185836509,0.871715242988342,0.006796084199285057,0.002420678285803977,0.7598874648582243,0.997868338727532,SEKER
36299,693.838,243.741422226525,189.8014846751817,1.2841913362461512,0.6273962540610891,36649,214.9821439895455,0.7383398083924902,0.9904499440639581,0.9475199478637539,0.8820090652861966,0.006714824712155293,0.002506724687078459,0.7779399912470302,0.9990237968788429,SEKER
36301,713.642,231.5127815971338,200.1100531073493,1.1569272907690373,0.5028760188402903,36793,214.98806644423578,0.767982567487518,0.9866278911749518,0.8957104676422055,0.9286228819035424,0.006377586887334613,0.0029254566694661027,0.8623404567948404,0.9976652084001889,SEKER
36311,689.155,240.15117170240404,192.6197446103851,1.2467630054653092,0.5972205601492435,36606,215.01767627076268,0.7831385066643661,0.9919412118231984,0.9607585337083411,0.8953430239233359,0.006613730596855059,0.0026217065539582527,0.8016391304881831,0.9994540116260444,SEKER
36325,690.5799999999999,246.17017165134996,188.31032174411797,1.3072579844340864,0.6440778506642283,36623,215.05912317896392,0.738868661391697,0.9918630368893865,0.9571665080922216,0.8736197474142053,0.006776880155577425,0.0024350020855883345,0.76321146307206,0.9977142789125714,SEKER
36331,692.7769999999999,235.04849027837892,196.99075071731647,1.1931955658957596,0.5455387773954011,36684,215.07688369458302,0.7838403451995685,0.990377276196707,0.9512623196304125,0.9150319725085552,0.0064696399845415465,0.002797724549424035,0.8372835107128973,0.9990429723802638,SEKER
36336,685.99,238.13567019125378,194.47783099872967,1.2244874851201384,0.5771074755169059,36612,215.09168300400847,0.7640033641715728,0.9924614880367093,0.9703120197095472,0.9032316865056881,0.006553711751190384,0.002690690577938521,0.8158274795079098,0.9989705386745416,SEKER
36340,683.8449999999999,235.80612338335547,196.76214818675675,1.1984323486829396,0.5511239267629265,36609,215.103521718441,0.8032714412024757,0.9926520800895955,0.9765161612800722,0.9122049870127512,0.0064888861690521596,0.0027715306588230746,0.8321179383309336,0.9972370552151463,SEKER
36343,697.705,243.40984459633725,190.96318831167653,1.2746427557496631,0.620086378253096,36737,215.1124003266897,0.7862706070702263,0.9892751177287203,0.9381817218024968,0.8837456869644074,0.006697571598281299,0.002520033747972054,0.7810064392281924,0.995504199956055,SEKER
36345,682.374,230.78649307751277,200.74164866086375,1.1496692122291339,0.49337728797429947,36613,215.11831919527327,0.7841423948220064,0.9926801955589545,0.9808658074400679,0.932109658267665,0.006349882874604836,0.0029567425388603566,0.8688284150358636,0.9988652794765681,SEKER
36349,686.8510000000001,226.51984814597367,204.81687579831885,1.1059628131864756,0.42713146420144443,36645,215.1301564439036,0.7408788879377115,0.9919224996588893,0.9682271616136202,0.949718791552737,0.0062318041251746585,0.0031273297913449586,0.901965783028391,0.9975406147960214,SEKER
36361,685.038,234.79073941157833,197.42007068825396,1.189295184593143,0.5412928414118989,36669,215.1656642824669,0.7894268345636127,0.9916005345114401,0.9736802402033452,0.9164146116738042,0.006457213481795834,0.002809266420922553,0.8398157404892493,0.9987888161093887,SEKER
36365,690.321,239.1409014156703,193.83464308891996,1.2337366406992918,0.5856753153301525,36680,215.17749892657037,0.7843031531725834,0.9914122137404581,0.9589396712570786,0.8997937937540547,0.006576128184124028,0.002659022462369415,0.8096288712783144,0.9988688038640666,SEKER
36369,689.67,236.8455650320201,195.6472670410296,1.210574359734607,0.5635907251127983,36716,215.1893329198107,0.7684457403651116,0.9905490794204161,0.9608565475911022,0.9085639112166547,0.006512292475240455,0.002737383146994342,0.8254883807653053,0.9993150680133168,SEKER
36373,689.957,244.47938147298416,189.70154561194857,1.28875798393909,0.6308056402409972,36684,215.2011662622953,0.7839008620689655,0.9915221895104133,0.9601629335207311,0.8802425994605839,0.006721452216561299,0.00248915767748302,0.7748270339051262,0.9985645261170752,SEKER
36384,689.5129999999999,239.4697422767855,193.65352886065,1.23658858005683,0.5882537561753935,36749,215.2337045995449,0.7551994686371373,0.9900677569457672,0.9616906409615653,0.8987929019891459,0.006581732142611738,0.0026494669268135825,0.8078286806660706,0.9989517211540383,SEKER
36393,681.9939999999999,233.83134049578157,198.33157242057663,1.1789920164598156,0.5297046502252744,36655,215.2603232171381,0.7828640265020328,0.9928522711771928,0.9832560192555918,0.9205794345648097,0.0064251735360036704,0.0028464902419519525,0.847466495343665,0.9991562322273606,SEKER
36396,689.842,231.76705239334544,200.31443390013393,1.1570162363281924,0.5029902134903631,36785,215.26919535823276,0.7986658181738386,0.9894250373793666,0.9610904369805378,0.9288170735885565,0.006367926486244242,0.0029234694778023994,0.86270115618961,0.9981592448104827,SEKER
36405,691.958,236.52167028495128,196.2618032809742,1.2051334815585073,0.5580852762166081,36738,215.29580958784032,0.7948689956331878,0.9909358157765801,0.9554576233983999,0.9102582834311167,0.006496955645789075,0.0027513650965876615,0.8285701425549633,0.9985376206126916,SEKER
36411,696.862,237.17218868379487,195.64122285596935,1.2122812627193633,0.5652917001243127,36825,215.313550579967,0.7703749153689912,0.9887576374745417,0.9422125934615552,0.9078364195012322,0.006513751028090271,0.0027292374536010185,0.8241669645728174,0.9991221685039195,SEKER
36421,687.4599999999999,238.69934565391856,194.4298757249949,1.227688619168482,0.5801090955236973,36706,215.34311565220597,0.7903691326143096,0.9922356018089685,0.96842694046216,0.902152098751138,0.006553893238898398,0.0026779235867909717,0.8138784092810833,0.9991892604613337,SEKER
36421,692.256,238.70345835523403,194.44872068371856,1.227590788542642,0.5800179392625078,36776,215.34311565220597,0.794784506273868,0.9903469654122253,0.9550547584157112,0.9021365552724266,0.006554006160051455,0.002677785172666017,0.8138503643588002,0.9990752105389361,SEKER
36426,696.3009999999999,242.00509897344287,191.82601702822177,1.2615864246289317,0.6096733171428463,36779,215.35789666627744,0.7425391389432485,0.990402131651214,0.9441202429968363,0.8898899138067763,0.0066437461970417526,0.0025700284660296175,0.7919040586950318,0.9990554100582049,SEKER
36439,689.312,237.3111157857188,195.70679318140867,1.212584969218444,0.5655930648180921,36736,215.3963225558983,0.7992761570519851,0.991915287456446,0.9637061622154128,0.9076537432422316,0.006512558406809156,0.00272654208910396,0.823835317621635,0.9989703232592974,SEKER
36443,703.908,229.651403267746,202.3781616769839,1.134763757931021,0.47266779207958626,36837,215.40814452750746,0.7676250658241179,0.9893042321578848,0.9242557965744757,0.9379787863798393,0.006301660216440633,0.003008893461576687,0.8798042036985961,0.9983699244325286,SEKER
36453,687.95,239.7786797348845,193.7050328362871,1.2378546712182603,0.5893891305274483,36717,215.43769661837476,0.758331599750364,0.9928098700874255,0.967897547949884,0.89848562372842,0.006577748874849381,0.0026442443307225726,0.8072764160466481,0.9992908825676791,SEKER
36461,694.029,242.56117650585492,192.0090373264601,1.2632799991254808,0.6110524031828779,36805,215.46133537270384,0.7589874893315848,0.9906534438255672,0.9512248865658622,0.8882762628235482,0.006652619963957514,0.0025548458667691214,0.7890347190957694,0.9967717792492775,SEKER
36461,695.283,239.6298858058227,194.02081669845256,1.2350730704234476,0.5868872173229811,36845,215.46133537270384,0.7758484945206937,0.9895779617315782,0.9477967563832035,0.8991421693840677,0.006572224727951036,0.0026497544690964733,0.8084566407646876,0.9985030256134689,SEKER
36463,695.4329999999999,239.70463702214536,193.9093326681648,1.2361686450251965,0.5878759209310591,36818,215.46724465606886,0.7856711915535445,0.99035797707643,0.947439901502617,0.8988864267826521,0.006573914297291648,0.0026474214980460715,0.8079968082540842,0.9988203196441348,SEKER
36469,692.125,240.75872960124838,193.11591947838284,1.2467057622776594,0.5971710966048005,36766,215.4849715338558,0.7655603837353318,0.9919218843496709,0.9566754864175632,0.8950245413354203,0.00660173653243161,0.0026132305445326124,0.8010689295926795,0.9986972505047902,SEKER
36473,690.992,232.63672540634448,199.74966760032788,1.1646413643692222,0.5125901352531947,36858,215.496788642257,0.7855312183670392,0.9895545064843453,0.9599206004809535,0.9263231687337874,0.006378327129831505,0.002896921042360833,0.8580746129330048,0.9993491879368869,SEKER
36474,690.0899999999999,233.84464959304685,198.80875112518234,1.1762291562598457,0.5265010635021364,36817,215.49974281810714,0.7715119722480751,0.9906836515740012,0.9624580061076836,0.9215508808652888,0.006411269660389506,0.002852338611355493,0.8492560260235898,0.9989196989383166,SEKER
36481,689.4279999999999,230.61825695170307,201.73552465077051,1.1431712751184115,0.4845572357100023,36781,215.5204209152429,0.7813450417648319,0.9918436149098719,0.9644922966925157,0.9345332141695009,0.006321599105060253,0.0029743062139997102,0.8733523283859782,0.9983912948686323,SEKER
36496,698.972,218.3369554534332,213.03918310166668,1.0248675960667681,0.21895126335356507,36927,215.56472444408544,0.7714877605377753,0.9883283234489669,0.9387189269350097,0.9873029693778109,0.005982490011328179,0.0035064166319679177,0.9747671533422431,0.9990072691707115,SEKER
36518,691.304,232.86544254788112,199.74614367027343,1.1658069501070252,0.5140254202919726,36855,215.6296864873635,0.8008333333333333,0.9908560575227242,0.9602376024394946,0.9259840538298264,0.006376730449309412,0.0028919571481664827,0.8574464679471189,0.9996170516774718,SEKER
36520,692.007,233.33187265951443,199.5817192597158,1.1691044326353333,0.5180413418317171,36852,215.6355911572302,0.7968927293357773,0.990990990990991,0.9583400932010246,0.9241583187903899,0.006389153139636211,0.0028748061753752813,0.8540685981894802,0.9984953839179666,SEKER
36527,691.8770000000001,238.31435956102013,195.39876597074692,1.2196308322474159,0.5724777780325945,36865,215.65625622861324,0.7652838885397025,0.9908314119083141,0.958884020657944,0.9049234659038441,0.006524334316013364,0.002698754443227627,0.8188864791434257,0.9987391980738526,SEKER
36532,697.29,243.7966069949502,191.49353847944258,1.2731322891144055,0.6189069290922053,36893,215.6710157815949,0.8121470810546441,0.9902149459247012,0.9441835705548859,0.884635017853477,0.006673508348706619,0.0025211023527483513,0.7825791148126219,0.9963267398545181,SEKER
36536,687.345,231.54174182620235,201.21178854732776,1.1507364627979566,0.49479680240197554,36879,215.6828226967644,0.7847753243405791,0.9906993139727216,0.971809873238169,0.9315072997017452,0.006337358819416531,0.0029432903765475855,0.8677058493976371,0.9985007598849334,SEKER
36540,710.343,239.11493957705994,195.10009030054528,1.225601378291067,0.5781563825752165,37058,215.69462896563476,0.7516353313860205,0.9860219115980355,0.9100016857108779,0.9020541725546284,0.006543922812727421,0.002672688898489682,0.8137017302232151,0.9972739620793987,SEKER
36549,694.092,239.78447997317207,194.25632798050128,1.2343715258389973,0.5862518454687693,36884,215.7211907081116,0.7755920550038197,0.9909174709901313,0.9533476169509444,0.8996461769846291,0.006560630385870258,0.002651015633889352,0.8093632437630587,0.9990549421618069,SEKER
36553,691.653,231.25057519305747,201.4553835958092,1.147899703971317,0.49100589644535103,36884,215.73299487724262,0.7775910483321987,0.9910259190977118,0.9601881910307248,0.932897116892098,0.006326445851039791,0.002955796710800756,0.8702970307055888,0.9990137039140615,SEKER
36554,698.1779999999999,247.48452657388827,188.25733938023205,1.3146075865548716,0.649123224117651,36868,215.73594581860746,0.7899809820193637,0.9914831290007594,0.9423504708418947,0.8717148857958922,0.006770381533454294,0.0024115193723487,0.7598868421181454,0.998953007571738,SEKER
36565,691.7369999999999,242.28374476325266,192.3284920291064,1.2597392211996659,0.6081591954317375,36892,215.76840350996997,0.7520567667626491,0.9911362897105064,0.9602701513290617,0.8905607915248622,0.006626110891925411,0.002570944758515861,0.7930985234013891,0.9990973162042709,SEKER
36566,694.803,245.2090877166219,190.1029227488968,1.2898754220655184,0.6316316116527443,36883,215.77135396707774,0.7785963716889532,0.9914052544532711,0.951839994390276,0.8799484390090626,0.0067059314039441525,0.002480091878684557,0.774309255314486,0.99876247750801,SEKER
36568,691.529,241.39219315019128,193.1193048814841,1.2499640742717661,0.5999693412735916,36883,215.77725476026296,0.7896691716334111,0.9914594799772253,0.9609267370264688,0.8938866329699776,0.006601186642698296,0.0025997497600133536,0.7990333126024034,0.9987629348993661,SEKER
36576,687.6099999999999,230.15637443193972,202.50333717465475,1.1365559582528502,0.4752494686329623,36883,215.80085631950885,0.781037796284433,0.9916763820730418,0.9721240881925515,0.9376271104901508,0.006292551794399052,0.0030000409703633798,0.8791445983261096,0.9991970313933484,SEKER
36587,705.861,248.4867776436177,187.74984870751766,1.3234992163999975,0.6550646944168971,36985,215.83330424942622,0.7517052925706772,0.9892388806272814,0.9227802487629024,0.8685907004636544,0.006791668561063157,0.0023846077315990725,0.7544498049319419,0.9985137256405561,SEKER
36589,698.326,241.3724332408798,193.2983034711731,1.2487043543911707,0.5988916373255737,37011,215.8392033489627,0.7793516230723353,0.9885979843830213,0.9428529847542183,0.8942164622981782,0.0065968578873672355,0.0026018816280914095,0.799623081445069,0.9984928236721432,SEKER
36592,698.4989999999999,239.81216437438337,194.39871730493311,1.233609808228389,0.5855599657844933,36953,215.84805169597678,0.7790836314086186,0.9902308337618055,0.9424632703392475,0.9000713214822791,0.006553677426059887,0.002653215471271456,0.8101283837548564,0.9993823201242032,SEKER
36594,688.1229999999999,235.72605418159364,197.84065505623744,1.1914945091269893,0.5436962166527448,36890,215.85395039247842,0.7631381381381381,0.9919761452968284,0.9711528737825047,0.9156983140531145,0.006441658582871335,0.002793747320389566,0.8385034023597164,0.9990721997959009,SEKER
36598,691.7779999999999,242.2988420266956,192.63727200647924,1.257798345579489,0.6065569999511005,36971,215.86574730192254,0.7747904140909476,0.9899110113332071,0.9610228723327382,0.8909070530272664,0.006620548719238636,0.002572784063872915,0.7937153771337285,0.9983338882198041,SEKER
36600,693.853,240.8547216602356,193.63501828362863,1.2438593173650103,0.5946976543054483,36908,215.87164551489144,0.7702830685046828,0.9916549257613525,0.9553357031393466,0.896273255624248,0.006580730100006437,0.002619483045064566,0.8033057487472887,0.999199340272191,SEKER
36601,692.969,247.36222830075963,188.59059333508154,1.3116360891937733,0.6470982841085217,36924,215.8745945609434,0.7872198563255474,0.9912523020257827,0.9578008133394538,0.8727063789968311,0.006758346173622569,0.002418203234528973,0.7616164239417607,0.9989635877647178,SEKER
36606,700.2289999999999,246.88718577008544,188.89145659749587,1.3070320395494182,0.6439207616514049,36991,215.88933918694403,0.7800127849989346,0.9895920629342272,0.9381708896395793,0.8744452998382497,0.006744445876907759,0.002432521164613645,0.7646545824092065,0.9994280383971138,SEKER
36609,688.1229999999999,224.37255927154143,207.98200314001585,1.0788075693284447,0.3751864334631392,36943,215.89818547919657,0.7640883286024378,0.9909590450152939,0.9715509525141748,0.96223079230429,0.006128890690036369,0.003240997088830773,0.9258880976585417,0.9988550881051489,SEKER
36613,697.6579999999999,233.05020362722448,200.35356719935817,1.1631946807082907,0.5107970673077893,36993,215.90997997171996,0.7570300223306592,0.9897277863379559,0.945279027258517,0.9264526553131823,0.006365231027974339,0.002892589833116316,0.8583145225368463,0.9983868869895358,SEKER
36620,688.188,236.19585396684698,197.7146380799981,1.1946300803043164,0.547081713823374,36899,215.93061878344548,0.7886972066076544,0.9924388194802027,0.971659302650551,0.9142015626309598,0.006449914089755516,0.002779083078911839,0.8357644971168886,0.9984294083062454,SEKER
36629,686.5419999999999,231.34643201348848,201.70649693720557,1.146945862063681,0.48971827185908806,36913,215.95715150025543,0.7840782601250107,0.9923062335762468,0.9765639868079905,0.9334794992112272,0.006315936334966515,0.0029582620660025733,0.8713839754476433,0.9994302449082748,SEKER
36648,728.404,244.72174964200883,191.1254361290357,1.2804248068623807,0.6245425232140361,37297,216.01315431115358,0.7603319502074689,0.9825991366597849,0.8679915528426261,0.8826888277284237,0.006677629055937809,0.002500532893093505,0.7791395665965788,0.9976296290782634,SEKER
36655,697.963,241.02284693233727,193.95364309451023,1.2426827518516423,0.5936672704800158,37023,216.0337832661072,0.7787999830025921,0.9900602328282418,0.9455364743000193,0.8963207679924,0.00657544255715011,0.00261793336361822,0.8033909191344859,0.9983600382026631,SEKER
36661,689.7429999999999,229.36002505238667,203.77633920433686,1.1255478724759882,0.4589613906452539,36979,216.05146365978592,0.7852002570143499,0.9914005246220828,0.9683660782329693,0.9419752357039505,0.006256240284018076,0.003038443219139064,0.8873173446795131,0.9987181495150691,SEKER
36663,698.145,234.7081444232982,199.09311562703402,1.178886289885496,0.5295828281071551,37092,216.05735680282973,0.772259083728278,0.9884341637010676,0.9452498101284204,0.9205362572044726,0.006401771388683365,0.0028355905406371312,0.8473870008280189,0.9989729175033409,SEKER
36677,690.331,239.38147034983848,195.21093800999978,1.226270785797751,0.5787844496213358,36981,216.0986043042656,0.7776646947819265,0.9917795624780292,0.9671390449258332,0.9027373922820898,0.006526746199248534,0.0026737587241865636,0.8149347994242678,0.9993307368639295,SEKER
36677,687.082,236.0777173463885,198.13166690310715,1.1915193620302917,0.5437232388277935,36958,216.0986043042656,0.7776646947819265,0.9923967747172466,0.9763072783799799,0.91537061071796,0.006436669229936704,0.0027875894577945367,0.8379033549661713,0.9983780709523334,SEKER
36701,719.886,234.41587386250418,200.83690704849738,1.1671951998638292,0.5157240975869929,37415,216.16929599581252,0.7602013339409255,0.9809167446211412,0.8899391372699098,0.9221615090904888,0.006387179473652058,0.0028491600473418907,0.8503818488480476,0.9925616120267695,SEKER
36705,698.444,247.00467610885735,189.4631854860808,1.3037080289511123,0.6415958031282457,37077,216.18107569698174,0.7717619848612279,0.9899668257949672,0.9455225930161041,0.875210457966021,0.006729455826423031,0.002435620962286164,0.7659933457330923,0.9986316749553574,SEKER
36707,697.665,244.37883462298188,191.50074838579383,1.2761246975947105,0.6212373211822568,37074,216.18696530686952,0.7862023174623572,0.9901008793224362,0.9476869135908741,0.884638662101791,0.006657553998501154,0.002515116599297629,0.7825855624852468,0.9986767642684721,SEKER
36711,701.5279999999999,244.5579161784373,191.29654932704875,1.2784230402417278,0.6230102308070572,37042,216.19874404531714,0.7551528366314231,0.9910641973975487,0.9373808122620945,0.8840390342857338,0.006661706741261129,0.0025098689110007646,0.781525014140853,0.9991195846029083,SEKER
36730,692.3489999999999,235.96806531963028,198.49626690805619,1.1887783533426908,0.540724566215777,37038,216.25468429174552,0.7666777991149704,0.9916842162103785,0.9628988185531409,0.9164574197733832,0.006424396006524102,0.0027955111765137473,0.8398942022576872,0.9984480467419663,SEKER
36733,696.7139999999999,235.20840050643247,199.11097578655915,1.1812929929014493,0.5323409601691532,37081,216.26351563950107,0.7705361637858701,0.9906151398290229,0.9509489163667424,0.9194548969078453,0.00640319060535302,0.002822915725718329,0.8453973074478168,0.9986619155058581,SEKER
36736,695.8059999999999,248.18559701483937,188.70286184843806,1.3152190411090665,0.6495374213365643,37023,216.272346626634,0.7507868383404864,0.9922480620155039,0.9535103063358563,0.871413769485192,0.006755923263687918,0.002403046325267932,0.7593619576483915,0.9987273057930212,SEKER
36738,690.192,237.93285290263927,197.05842320903392,1.2074229004169335,0.5604175338656808,37032,216.27823375106522,0.74666178891531,0.9920609202851588,0.9691377970034395,0.9089885281187504,0.006476478112652819,0.002727421589187503,0.8262601442514924,0.9976454198710506,SEKER
36740,708.7319999999999,239.51141444529108,195.929858842445,1.2224344766046698,0.5751616806590745,37128,216.2841207152524,0.7535482812371811,0.9895496660202543,0.9191469107452988,0.9030221846260099,0.006519091302267041,0.0026739944741519237,0.8154490659267315,0.996833052103911,SEKER
36741,692.928,238.6154110407801,196.4650043852313,1.2145440954608877,0.5675278293176036,37052,216.2870641372586,0.7526425762045231,0.9916063910180287,0.9615782137400691,0.9064253779496853,0.006494526851222887,0.0027043039640750623,0.8216069657912299,0.9978778890912736,SEKER
36746,701.775,243.97109228862598,191.9849459705951,1.2707824098145342,0.6170591412872137,37125,216.30178064648078,0.75923056261493,0.9897912457912458,0.9376141415975863,0.8865877453652932,0.006639391832815163,0.0025304336773420335,0.786037830231914,0.9988830481074992,SEKER
36768,699.477,244.34699004645495,191.69754674476673,1.274648498093654,0.620090849895512,37178,216.3665213955765,0.781732363821916,0.9889719726720103,0.9443500194405632,0.8854887934344564,0.006645642679679475,0.0025202813530493724,0.7840904032980092,0.999439654933455,SEKER
36775,691.274,244.7388892547574,191.47991200118796,1.2781439405154886,0.6227957159000702,37039,216.38711666278934,0.7551799905538329,0.9928723777639785,0.9670793282738624,0.8841550164818486,0.006655034378103532,0.0025086711037948114,0.7817300931700181,0.999163581703867,SEKER
36778,686.751,231.398456075584,202.78526912892787,1.141100914625432,0.4816809042294005,37050,216.3959426058396,0.7542657916324856,0.9926585695006748,0.9799397429961925,0.9351658877756558,0.006291762903789874,0.0029682927930148118,0.8745352376592302,0.9979329595651173,SEKER
36789,687.353,237.48879469242232,197.36928433557023,1.2032712967061292,0.5561711538321388,37058,216.42830131769253,0.7879417434140072,0.9927411085325706,0.9785165647286819,0.9113200544808618,0.006455429467841538,0.0027465569774311476,0.830504241699001,0.9993219158290976,SEKER
36791,699.6320000000001,245.28193559803375,191.52053206835862,1.2807083029118063,0.6247586474175333,37159,216.43418420007356,0.7913404456680719,0.9900966118571544,0.9445221043879743,0.8823894171919954,0.006666900481042477,0.0024931298489132814,0.7786110835724294,0.9971736794703686,SEKER
36805,699.998,236.57444527078007,198.47385297352466,1.1919678170521426,0.5442103163326566,37153,216.4753599003306,0.7770997846374731,0.9906333270529971,0.9438937007348485,0.9150411814452558,0.00642778006441462,0.0027797345868920357,0.8373003637407296,0.9980350867850024,SEKER
36806,692.8389999999999,243.3129110180663,192.89882746457184,1.2613498703757213,0.6094799985730773,37082,216.47830072208714,0.756624524617124,0.9925570357585891,0.9635268767346927,0.8897115233889638,0.006610686057112055,0.002555189756124119,0.7915865948511106,0.9984676488066069,SEKER
36813,691.769,243.00747297141507,193.3256032231471,1.2569854634873292,0.6058824943069855,37100,216.49888535587326,0.778303981056682,0.9922641509433963,0.9666936868946869,0.8909145167784202,0.0066011320178039025,0.002565324584079037,0.7937286762065259,0.997705407944644,SEKER
36824,689.547,236.36141578127956,198.57726700300114,1.1902742914560678,0.5423657496450831,37125,216.53122868382664,0.7671986332763865,0.9918922558922559,0.9732246028501162,0.9161022663876617,0.00641867846462306,0.0027886962572000974,0.8392433624806104,0.9989297986358164,SEKER
36831,692.4899999999999,240.3522782552022,195.32687303533362,1.2305131112794896,0.5827254164957165,37129,216.55180828647167,0.7822568655353312,0.9919739287349512,0.9651534379461492,0.9009767240755688,0.006525814619619402,0.0026525817744406624,0.8117590573259437,0.9988801632394525,SEKER
36839,693.645,239.66612381187727,195.87266385795417,1.2235812751578337,0.5762506074966366,37173,216.57532543782233,0.7937728937728937,0.9910149839937589,0.9621508691762912,0.903654308724166,0.006505771704223167,0.002676010892091855,0.8165911096757504,0.9991655912596049,SEKER
36841,689.544,238.38848839779695,197.08274019917104,1.2095858224666578,0.5625999641015572,37129,216.58120432666388,0.7971654224818782,0.9922432599854561,0.9736823696314866,0.9085220758028238,0.006470738807247277,0.0027194155124311377,0.8254123622210721,0.9984070910313224,SEKER
36847,691.017,235.62074925588826,199.31102946641366,1.182176169009218,0.5333453174259778,37168,216.5988400358057,0.7650955149501661,0.9913635385277658,0.9696936124480766,0.9192689553863338,0.006394570772542901,0.0028168358300984003,0.8450554123370815,0.9990043699571559,SEKER
36851,699.211,240.53715220722287,195.53654817026094,1.2301390939855308,0.582380673451061,37198,216.61059637754448,0.7689306207616067,0.9906715414807248,0.9472020678790828,0.9005286476117184,0.006527289685686219,0.00264790733554168,0.8109518451693905,0.9975835680825683,SEKER
36856,693.2729999999999,239.92745705157168,195.7341718753037,1.2257821654382464,0.5783261735703028,37126,216.62529090750036,0.7908164360047205,0.9927274686203739,0.9636281758892591,0.902878284834809,0.006509861543617638,0.0026685069987021745,0.8151891972262467,0.9992443794178543,SEKER
36860,704.3219999999999,238.8886589856212,196.71001574901751,1.2144204151273081,0.5674061584730576,37289,216.63704581381756,0.7803700724054706,0.9884952667006356,0.9337329543844118,0.9068536226613296,0.006480972842800358,0.0027037637018909343,0.8223834929339773,0.9987193028827265,SEKER
36863,690.538,236.75422111622532,198.35879874599394,1.1935655116534467,0.5459376340661679,37161,216.64586157499593,0.7684594538253074,0.9919808401280913,0.9714610108394743,0.915066521532649,0.006422543502054237,0.0027777776789076475,0.837346738829862,0.9994281887628091,SEKER
36864,698.9150000000001,248.77811566751183,188.82613826474667,1.3174982973951865,0.6510739955198193,37195,216.64880008233843,0.7466277798031352,0.9911009544293587,0.9483389731010803,0.8708515196404424,0.00674853829393207,0.002394230370190262,0.7583823692600679,0.9991674802746671,SEKER
36870,692.977,245.22846329591852,191.52879904831025,1.2803738368038498,0.6245036428492161,37138,216.6664302894785,0.7551459293394778,0.9927836717109161,0.9648179184269777,0.8835288831379494,0.006651165264331937,0.002500118004007927,0.7806232873389922,0.9994896335086595,SEKER
36872,692.414,237.20610332533673,198.1927711958059,1.196845383886314,0.5494451121748267,37183,216.67230670640612,0.7845106382978724,0.9916359626711131,0.9664399594592556,0.9134347880131576,0.006433231268315707,0.002762607060052781,0.8343631119526421,0.9986036390255397,SEKER
36880,694.7049999999999,239.58275779383055,196.27472370373556,1.220650083071653,0.5734570916656382,37219,216.69581078053355,0.7760942760942761,0.990891748837959,0.9602845181004157,0.9044716438526347,0.006496278682045297,0.0026817867042668157,0.8180689545334873,0.9985759373096414,SEKER
36883,696.855,237.68661578499734,197.7173757558593,1.202153401421289,0.5550146173803497,37217,216.70462415109424,0.7796685409884582,0.9910256065776393,0.9544457789532237,0.911724134888257,0.006444340638912164,0.00274670524708373,0.8312408981377405,0.9992790730967719,SEKER
36888,697.864,249.44492608921607,188.60302028823054,1.3225924256568349,0.6544667007221301,37205,216.71931230555037,0.7775880604565863,0.9914796398333557,0.9518168359760756,0.8688062559670542,0.006762224194567775,0.002376627323619143,0.7548243104074907,0.9983249156465908,SEKER
36892,697.906,243.86068635065536,192.90208529997682,1.264168222813321,0.6117722356953491,37200,216.73106211240145,0.7653306779520371,0.9917204301075269,0.9518054778220358,0.8887494960985908,0.006610123776175197,0.002543939768697205,0.7898756668154993,0.9985357179616365,SEKER
36898,695.299,239.85941764809385,196.36856488374494,1.2214756358284564,0.5742472803856348,37250,216.74868562839782,0.7758037047160489,0.9905503355704698,0.9591123451193353,0.9036488446177978,0.00650060755726852,0.0026738220580818962,0.8165812343790809,0.9974340824687735,SEKER
36906,702.4119999999999,246.36820220583937,190.9485904483975,1.2902331545223875,0.631895354009402,37298,216.7721814209469,0.7792322959334488,0.9894900530859564,0.9399894872951869,0.8798707766671726,0.0066755595893849065,0.002467987832414846,0.7741725836328935,0.9988631347254151,SEKER
36911,690.768,229.5186144910767,204.91462952158741,1.1200694407565337,0.4504497378998984,37249,216.78686499813494,0.7770900440009263,0.9909259308974737,0.9720783131947827,0.9445284665857168,0.006218162999947894,0.0030528261320218247,0.8921340241907656,0.9992520575552266,SEKER
36917,700.833,236.92547695658902,198.7767874989929,1.1919172250320698,0.5441554164750302,37353,216.80448397804875,0.7717086834733894,0.9883275774368859,0.944511345821973,0.9150745912301066,0.006417787928504185,0.0027758187871980474,0.8373615075149469,0.9980656043858862,SEKER
36919,706.713,248.88400723850722,189.0083082873627,1.3167887141771104,0.650596869693234,37346,216.81035665317623,0.7704620393171668,0.9885663792641782,0.9289099879996751,0.8711301262736637,0.006741352887090854,0.0023947432461459057,0.7588676969015692,0.9992684188335625,SEKER
36934,697.6080000000001,244.05359186882936,192.903767686272,1.2651572066012966,0.6125709509663945,37227,216.8543966472631,0.7754030903594222,0.9921293684691219,0.9537033413267385,0.8885523666613974,0.006607829963416617,0.002540801478666887,0.7895253082995702,0.9988736335893117,SEKER
36939,695.361,241.64361040320026,195.29701330420883,1.237313394172591,0.5889044316096853,37283,216.86907465789625,0.7303373008027205,0.9907732746828313,0.9600068674886835,0.8974748982438813,0.006541693343165767,0.0026179369717129293,0.8054611929778651,0.9966079225577464,SEKER
36952,696.83,242.21981633673988,194.41354475737774,1.2458999018768109,0.5964735968093149,37282,216.9072328371134,0.7862964145121821,0.9911485435330722,0.9562999517656134,0.8954974705106856,0.006554985287311644,0.0026002130749256595,0.8019157196910364,0.9991067164765342,SEKER
36955,708.623,241.90023967139,194.6788050264854,1.2425607381269896,0.5935601461995673,37410,216.91603761752597,0.7746567445760403,0.9878374766105319,0.9248101383659447,0.8967169189753433,0.006545805430155325,0.0026107441326486806,0.8041012327766325,0.9991446213277547,SEKER
36955,697.491,235.64459356831577,199.85361319779327,1.179085980972986,0.5298128686510116,37319,216.91603761752597,0.7687747035573123,0.9902462552587153,0.9545657646731134,0.9205220214595748,0.006376528035944142,0.002824234580084272,0.847360791992022,0.9991112306639597,SEKER
36957,696.21,245.41002548429907,191.99584679591317,1.2782048652602567,0.6228425607035846,37260,216.92190727258833,0.7679536198154767,0.9918679549114332,0.9581335772020194,0.8839162411743714,0.006640420637072789,0.0025004594059014444,0.7813079214118295,0.9986715864149788,SEKER
36968,693.68,246.9912937284418,190.77464967680444,1.2946756508103945,0.6351434139902847,37213,216.95418753683805,0.7777824531874605,0.9934162792572488,0.9654226264775251,0.8783879960375102,0.006681218722366419,0.0024534715178595404,0.771565471582793,0.9989270290642814,SEKER
36975,694.805,241.36787303421073,195.18917138786676,1.2365843418361604,0.5882499459839178,37252,216.9747270227172,0.7774226782447804,0.9925641576291205,0.9624810255153572,0.89893789216912,0.006527866748727809,0.00262947951932695,0.8080893339774604,0.9992706172013393,SEKER
36975,692.588,239.6615036217393,196.52641312142276,1.2194874969486456,0.5723397274414532,37239,216.9747270227172,0.7574360865290068,0.9929106581809394,0.9686527629781317,0.9053382530937094,0.006481717474556844,0.0026860453664392936,0.8196373525147695,0.9995375034238511,SEKER
36976,692.7189999999999,242.85084541461887,194.06002160580127,1.25142130463083,0.6012095619604275,37264,216.97766107626694,0.799377378069872,0.9922713610991842,0.9683126216215012,0.8934605959712486,0.006567796554917213,0.002581672026920306,0.7982718365532989,0.9989743831495779,SEKER
36980,697.756,227.46902599799526,207.20022901169023,1.0978222711576322,0.4126398622167692,37374,216.98939689373375,0.7928816466552315,0.9894579119173758,0.9544861071922514,0.9539294237609569,0.006151136452082078,0.003141956028339524,0.9099813455169115,0.9989977874464538,SEKER
36982,708.8960000000001,244.45263981385455,192.91531557200696,1.2671499880091734,0.6141715317969133,37558,216.9952645644503,0.7600238393719558,0.984663720112892,0.9247731388340015,0.8876781397398186,0.006610043800060963,0.0025316647792876217,0.787972479771945,0.9984793182945787,SEKER
36986,693.771,232.713769477169,202.59163672236417,1.1486839893400183,0.4920597126275721,37350,217.00699942991406,0.7717475221700574,0.9902543507362784,0.9656393278227199,0.9325060563345999,0.00629194207205886,0.0029347500769142383,0.8695675451007082,0.9988583167068877,SEKER
36988,697.8729999999999,242.5012245410616,194.49817646836013,1.2468046176284349,0.5972565101585291,37312,217.012866624687,0.7621677313002266,0.9913164665523156,0.9543725082338667,0.894893900166435,0.006556213489268455,0.0025936958135668905,0.8008350925550936,0.9984848913565855,SEKER
36993,697.963,234.35381090186817,201.19272433762075,1.1648224938223906,0.5128137220668767,37364,217.02753391767567,0.7773925104022191,0.9900706562466546,0.9542553756317177,0.9260678675652192,0.006335085310784964,0.0028741107040332983,0.8576016953367924,0.9989537454685126,SEKER
36995,694.774,245.20670807928096,192.3369273133516,1.2748810720044153,0.6202718805480991,37328,217.03340055732744,0.741234221598878,0.9910790827261037,0.9630875752154334,0.885103846698825,0.006628104016198972,0.0025092618909081103,0.7834088194410573,0.9987530755467285,SEKER
37004,696.689,246.47410931330762,191.40563625559213,1.287705598095242,0.6300247923927759,37330,217.0597984735542,0.790768244470563,0.9912670774176265,0.958033353815627,0.8806596322765764,0.0066607423336208955,0.002471352838529746,0.7755613879215149,0.9986947408930503,SEKER
37008,691.802,242.24709164424965,194.61444888006562,1.2447538866630525,0.5954779349644354,37288,217.07152985032124,0.7933459097924884,0.9924908817850246,0.9717215919595518,0.8960748646225243,0.006545803384247991,0.002603274115887,0.8029501630082753,0.9994753362012821,SEKER
37027,698.1129999999999,245.18132652167472,192.43787009621965,1.2740804416463514,0.6196480471132196,37328,217.12724523400757,0.7862694300518135,0.9919363480497214,0.9547220200528164,0.885578230260586,0.0066216902941549334,0.002512212399721508,0.7842488019114715,0.9991960598999896,SEKER
37031,700.842,245.13970423133125,192.4627247755492,1.2736996450466664,0.619350705031127,37423,217.13897296682558,0.764503076097279,0.9895251583250942,0.9474036716267842,0.8857764336776625,0.006619851049967088,0.002513763793998072,0.7845998904587184,0.999344601980923,SEKER
37039,690.6949999999999,236.01624923149978,200.05250014845126,1.1797715552485533,0.5306009917143905,37324,217.16242653241304,0.7728534167970788,0.9923641624691887,0.9756554898947667,0.9201164209647543,0.006372101007897076,0.0028173028850503054,0.8466142281289891,0.998811384615291,SEKER
37043,710.832,246.1208288974447,191.8970266070555,1.2825671832916017,0.6261703829933437,37450,217.1741523653877,0.762892330504984,0.98913217623498,0.9212597022159189,0.8823883510317662,0.006644192665211908,0.0024846261083359103,0.7786092020365595,0.9986186111409516,SEKER
37047,710.5229999999999,249.18603791682898,189.47116047422034,1.315166051092686,0.6495015593907506,37442,217.18587756528638,0.7978077353777242,0.9894503498744726,0.9221607379860883,0.8715812466097185,0.00672621367227654,0.0023943185535798524,0.7596538694417511,0.9990709796709867,SEKER
37049,692.49,235.95261826984944,200.1860404433301,1.1786666929787462,0.5293296059084152,37347,217.1917399278643,0.7838072268765338,0.992020778108014,0.9708661106803201,0.9204887893190102,0.00636866361493831,0.0028203440309844774,0.8472996112619773,0.998683830768332,SEKER
37053,735.0790000000001,243.11933961186793,194.37744248809094,1.2507590206963615,0.6006467596173761,37533,217.20346417834128,0.7548588192152549,0.9872112540963952,0.8617180872310567,0.8934026578268084,0.006561394208616521,0.002578486454351469,0.7981683090120053,0.9983162125307267,SEKER
37068,704.024,245.36498060505798,192.52709939543806,1.2744438646587324,0.6199314417994688,37452,217.2474244824159,0.8095217296352916,0.9897468760012816,0.9397970763029044,0.885405178631011,0.006619320724211125,0.0025093510286000975,0.7839423303466126,0.9990904931565097,SEKER
37074,720.1839999999999,235.53074647003643,200.75248470458286,1.173239508425669,0.5229866318621337,37612,217.26500611352813,0.7548406800366487,0.9856960544507072,0.898239961585105,0.9224485948002036,0.006352989870799925,0.002837439564398169,0.8509114100488704,0.9983228844395295,SEKER
37075,699.1789999999999,233.450953987875,202.3679044286567,1.1535967358409664,0.4985619919344512,37441,217.26793624705914,0.7922008547008547,0.9902246200689084,0.9530468984484871,0.9306791535250852,0.006296721618014161,0.0029140312223974057,0.8661636868061693,0.999203601803574,SEKER
37083,704.9839999999999,237.16033876055505,199.69180268640017,1.1876318184827857,0.5394591143540575,37498,217.2913758928643,0.767541499358364,0.9889327430796309,0.9376185783962165,0.9162213927862908,0.006395392464486558,0.0027800248313649234,0.8394616405992505,0.9969713547714305,SEKER
37090,693.4470000000001,242.4224979417506,194.95272477090646,1.2434937661252337,0.5943780251031171,37376,217.31188350899538,0.7892328971167145,0.9923480308219178,0.969259686818467,0.8964179700896044,0.006536060877372623,0.002603383017758487,0.803565177099567,0.999228288398631,SEKER
37092,706.3879999999999,238.34724023053576,198.40917758344094,1.2012914076532517,0.5541189682619453,37492,217.31774247243746,0.7937853107344632,0.9893310572922224,0.9341217608478783,0.9117694933754718,0.006425839540346591,0.002739364781842727,0.8313236090501647,0.9986619085312537,SEKER
37094,691.978,240.59051343030566,196.49778738260335,1.224392990043439,0.5770182737885169,37364,217.3236012779241,0.7598738118649623,0.9927737929557863,0.9734843123480053,0.9032924789068147,0.006485968443152684,0.0026635948760175693,0.8159373024496183,0.9990279134342659,SEKER
37109,694.497,239.85975573306519,197.20229039876537,1.2163132347400305,0.5692613304634803,37419,217.36753728553202,0.7874755962991257,0.9917154386808841,0.9668261028287644,0.9062276271449043,0.006463654524052526,0.00268910085063673,0.8212485122006838,0.998895434400251,SEKER
37109,694.2189999999999,249.22242521833817,189.71022582687775,1.313700535287797,0.6485072363931181,37369,217.36753728553202,0.7690028183023873,0.9930423613155289,0.96760058889899,0.8721828988507001,0.00671595637765335,0.0023972752278350923,0.7607030090476107,0.999335950180884,SEKER
37114,702.7099999999999,238.44660351915692,198.39143950798763,1.201899659130991,0.5547513183187804,37525,217.38218064804857,0.7625328731097962,0.9890473017988008,0.9444856409440593,0.9116597906607798,0.006424707752307941,0.0027375643807438584,0.831123573907657,0.9989271401753438,SEKER
37117,699.991,249.51442671535642,189.77797742607825,1.3147701861905792,0.6492334507596952,37429,217.39096619210062,0.7500505193388028,0.9916642175852948,0.9519142288476486,0.8712560995124264,0.006722375911721218,0.002389383625905718,0.7590871909376072,0.9980252073639215,SEKER
37135,696.823,242.78900970049636,195.13057042003538,1.2442387124573668,0.5950289090377535,37424,217.44367200206187,0.7506114446263619,0.9922776827704147,0.9610552120200172,0.8956075576497453,0.006538010224868624,0.0025947549980501823,0.8021128973193419,0.998019918606066,SEKER
37138,707.7719999999999,252.25606430537616,187.5939608168799,1.3446918184728571,0.6685526415647783,37506,217.45245506173177,0.7503535782115004,0.9901882365488188,0.9316260434647278,0.8620306340722425,0.006792397660223388,0.002313628711409723,0.7430968140789923,0.999236206225267,SEKER
37152,694.797,246.69068502283292,192.21658536090763,1.283399580528622,0.6267995370173306,37406,217.49343798377174,0.7768484442957511,0.9932096455114153,0.9671107102947684,0.8816443067708098,0.006640037818228707,0.002474707902757138,0.7772966836613819,0.9975822377573067,SEKER
37164,710.014,251.92494869564143,188.17405065773775,1.338786872127537,0.6648859644601987,37548,217.52856005715108,0.7448591012947449,0.9897730904442313,0.9263998819694829,0.8634657312958482,0.0067787361074061305,0.0023243895541075633,0.7455730691222741,0.9981634371527373,SEKER
37165,692.541,236.98426521346033,199.9171911696468,1.1854121390308998,0.5369902339304673,37477,217.53148664062937,0.750307875557709,0.9916748939349468,0.9737624463141705,0.9179153157898093,0.006376544200550527,0.002792386967193775,0.8425685269615055,0.9987909598255527,SEKER
37170,693.7449999999999,232.97539250251378,203.25897970927883,1.1461997538103277,0.48870646039428733,37485,217.546118967464,0.7926556202418271,0.9915966386554622,0.9705159852165042,0.9337729475661971,0.006267834073244923,0.002939425144174155,0.8719319176064639,0.9994081492998957,SEKER
37177,692.0519999999999,235.08573194165908,201.57287701309025,1.1662567674042401,0.5145771004266158,37506,217.56660257176225,0.7804227806117093,0.9912280701754386,0.975453899700437,0.9254777003044807,0.006323418563672676,0.0028615117105114827,0.8565089737608703,0.9989093869910756,SEKER
37179,704.496,240.38358689529824,197.17924513197525,1.2191120152346948,0.5719777005470468,37555,217.57245467592767,0.7716687422166875,0.9899880175742245,0.9413486524017569,0.9051052839588993,0.0064655742998816065,0.0026765987494451957,0.81921557505032,0.9987155506112452,SEKER
37187,706.995,246.09295569091353,192.84468572414787,1.276119975859402,0.6212336638160616,37563,217.59586151870283,0.742611230928988,0.9899901498815323,0.9349068094643478,0.8842019102407697,0.006617714676927785,0.0024951324055219872,0.7818130180734261,0.9976872097504266,SEKER
37189,700.2529999999999,243.34340120391332,194.9100617393086,1.248490709162999,0.5987083451179707,37534,217.60171283598842,0.7848264218634589,0.9908083337773752,0.9530471968503692,0.8942166163513336,0.0065434241631641965,0.002580808490627221,0.7996233569588282,0.9983223319928254,SEKER
37190,738.9639999999999,243.82961332688427,194.38422597852517,1.2543693404104799,0.6036976513551642,37707,217.60463843562871,0.7856599628189961,0.986289017954226,0.8558338889154938,0.8924454887434133,0.0065563219501716665,0.002565469338665185,0.7964589503784698,0.9990536882502644,SEKER
37191,698.872,234.88885106083984,201.76366629402258,1.1641781465179424,0.5120174180103096,37541,217.60756399593612,0.7873610670053985,0.9906768599664367,0.9568688966849033,0.9264278104862985,0.0063157444290511105,0.0028697934838799017,0.858268488042437,0.9991774176240011,SEKER
37196,700.4849999999999,233.09920137961058,203.34569734210675,1.1463198111708597,0.48886954729880533,37561,217.62219120753545,0.7741425241425242,0.9902824738425494,0.9525952757250263,0.9336033324847379,0.006266781411431621,0.0029367966917756647,0.871615182426608,0.9991497513329236,SEKER
37211,701.519,244.69685922660886,194.12859420429356,1.2604884933597118,0.6087746179002077,37559,217.6660669446208,0.7926003237624606,0.9907345775979126,0.9501722210110022,0.8895335544255786,0.006575928064997147,0.0025397218545675114,0.7912699444490036,0.9973866601193473,SEKER
37212,698.087,241.88610371394975,196.05636563977788,1.2337579701868833,0.5856947080025442,37535,217.66899167930393,0.7767387492694331,0.9913946982816039,0.9595636224610663,0.8998821690753903,0.0065002177715239645,0.002629361232191438,0.8097879182198293,0.9990822982647584,SEKER
37220,697.179,246.03018601011996,192.88187882247377,1.2755484730453257,0.6207905292651246,37513,217.69238814217357,0.7624549328089151,0.9921893743502253,0.9622715340133878,0.8848198331777842,0.006610160827783986,0.0024992585350165544,0.7829061371847621,0.9986347278238373,SEKER
37225,713.7979999999999,252.81336847921958,188.52729210439898,1.3409908223750517,0.6662625384041331,37629,217.7070096546421,0.7928985260287978,0.9892635998830689,0.9181083070617477,0.8611372530030463,0.006791494116298712,0.0023037460352069283,0.7415573685096327,0.9944216254360119,SEKER
37227,698.145,241.32395847568054,196.7439616438663,1.2265888948221455,0.5790823144912115,37555,217.71285798467648,0.7827211370660836,0.9912661429902809,0.9597909249556966,0.9021601475454685,0.006482498145853293,0.0026488460486505366,0.8138929318192615,0.9983120317437437,SEKER
37240,695.977,244.75278388436138,194.08449372110394,1.261063051415467,0.609245374024208,37527,217.75086830122507,0.7899537567349709,0.9923521731020332,0.9661170819546744,0.8896767785248403,0.006572308912039779,0.0025399592640743085,0.7915247702463376,0.9981626420377729,SEKER
37248,705.1159999999999,232.27103323702875,204.47899274529482,1.1359163604955378,0.4743311374270322,37661,217.774255967723,0.781371932032725,0.9890337484400308,0.9414379123599748,0.9375868050902757,0.006235798787506141,0.002972472210123559,0.8790690170793907,0.998548878505211,SEKER
37248,703.5569999999999,249.15204425220546,190.70676618718346,1.306466724980573,0.6435271992334797,37633,217.774255967723,0.7359810314167161,0.9897696170913826,0.9456147674918334,0.8740616863945129,0.006689004624468574,0.0024082945015475093,0.7639838316228198,0.998119454438375,SEKER
37256,693.8059999999999,245.9339799235677,193.07607093553082,1.2737672707545744,0.6194035399438554,37502,217.79764112279364,0.7750686527419489,0.9934403498480081,0.972590417599765,0.88559393537437,0.006601191215470466,0.002504612887801258,0.7842766183718641,0.9989858877001563,SEKER
37264,693.036,239.74359582158854,198.16403438839592,1.2098239549952736,0.5628390139474819,37541,217.82102376724592,0.7834990853850844,0.9926214006020084,0.9749621271457791,0.9085582579204456,0.006433651669750659,0.0027042598896293434,0.825478108035435,0.9986831894254455,SEKER
37265,700.1869999999999,232.93729159444945,204.15828162239058,1.1409642055338627,0.4814898177270327,37602,217.82394642131484,0.778950668896321,0.991037710760066,0.9551749035771979,0.9351183957292362,0.0062508329959600015,0.0029483841031573586,0.8744464140312203,0.9977120580670663,SEKER
37268,714.7289999999999,250.0604703845461,189.92289830442914,1.3166420300922426,0.6504980989596854,37667,217.83271414824276,0.7512497984196097,0.9894071733878461,0.9167758048895784,0.8711201487114573,0.00670979044715429,0.00238342206424282,0.7588503134910715,0.9991342172910189,SEKER
37301,711.8879999999999,229.38157438978243,207.10910182152364,1.1075398056984096,0.4298462801433358,37731,217.92913586339554,0.7819916142557652,0.9886035355543187,0.9249260140845419,0.9500725437217288,0.0061494751987824035,0.003090614851373379,0.902637838333876,0.9997073360843335,SEKER
37301,699.0319999999999,251.58746220203588,189.09896256787573,1.330453952711297,0.6595927759343062,37579,217.92913586339554,0.7377425288265659,0.9926022512573511,0.9592597556278064,0.8662162015386474,0.006744791351492879,0.00234235918441862,0.7503305078080424,0.9982801899530849,SEKER
37308,698.8729999999999,240.09766501484077,198.4496452619752,1.2098669397865924,0.5628821384708665,37607,217.94958347053444,0.7995370965667995,0.9920493525141596,0.9598763850489986,0.9077538653158608,0.006435554439124069,0.0026954926912633394,0.8240170799958858,0.9969510229065061,SEKER
37311,694.501,240.87659140281528,197.61534094331248,1.2189164578670673,0.5717889273069446,37590,217.95834614350892,0.7480152365677626,0.9925778132482043,0.9720777491674831,0.904854825760215,0.00645591357516055,0.002669642442804979,0.8187622557015491,0.9980027885549823,SEKER
37315,701.9989999999999,238.05465894339184,199.83585018446388,1.1912510128870724,0.543431306395839,37735,217.9700291594984,0.7753927354334635,0.9888697495693654,0.9515252624072239,0.9156301755527941,0.0063795969166124036,0.002766007731300701,0.8383786183828409,0.9987193783314233,SEKER
37322,695.359,240.96243539939232,197.32881047539843,1.2211214105982453,0.5739085585685059,37630,217.99047293082728,0.772712215320911,0.9918150411905394,0.969966225790723,0.9046657939421583,0.0064563108997211386,0.0026675764622967816,0.8184201987289957,0.9993904275340473,SEKER
37348,702.527,242.76090940229184,196.6162256718177,1.2346941793476223,0.5865442848952397,37715,218.06639015852227,0.815013638843426,0.9902691236908392,0.9509357485629258,0.898276376931646,0.006499970799033197,0.00261054439335853,0.8069004493534445,0.9962752881296789,SEKER
37348,701.625,239.79061492446633,198.5159349536277,1.2079162057216222,0.5609170692324414,37690,218.06639015852227,0.7859427609427609,0.9909259750596975,0.9533823415364192,0.9094033568712139,0.006420440583818848,0.0027087617357438986,0.8270144654886323,0.9989641752299243,SEKER
37350,699.848,238.17299089404383,199.95433073558755,1.191136946210959,0.5433071079115073,37637,218.07222885057675,0.7862826828344069,0.9923745250684167,0.9582813113658007,0.9156043598058131,0.006376786904793677,0.002764477597503093,0.838331343695413,0.998567436642284,SEKER
37352,703.246,241.94129098985962,196.93131081948198,1.2285567489653093,0.580916419301409,37811,218.0780673863096,0.8027509133892112,0.9878606754648118,0.9490939034886337,0.9013677098856591,0.006477331628556961,0.002637447842114587,0.8124637484245177,0.9981578214165944,SEKER
37353,701.883,237.32265120556275,200.89589749744027,1.181321540966692,0.5323734902319212,37752,218.08098659555932,0.7764405088550761,0.9894310235219326,0.9528091179522525,0.9189219212230324,0.0063535097905272064,0.0027945244508033123,0.8444174973042291,0.9975285791346692,SEKER
37362,721.3090000000001,234.39346536920584,203.51149970212884,1.151745555962575,0.496131615282673,37914,218.10725772058834,0.7615728000978413,0.9854407342934008,0.9023962419649266,0.9305176549057619,0.0062735791812324245,0.0029013065368804214,0.8658631060913188,0.9972539845126281,SEKER
37362,714.562,263.88581735851676,180.41298718845908,1.462676393040719,0.7297835876442961,37693,218.10725772058834,0.7398415841584158,0.9912185286392698,0.9195178116795534,0.826521333748932,0.007062946773687617,0.002033208738200481,0.6831375151421135,0.9992091165988661,SEKER
37365,700.139,247.56829391150427,192.31899105759356,1.2872794961646052,0.6297078130358864,37673,218.11601405909965,0.7548484848484849,0.9918243835107371,0.957869424711197,0.8810337164462076,0.006625673595918755,0.0024625208438146438,0.7762204095150167,0.9992126176731742,SEKER
37365,702.379,247.35402214285128,192.7094908526993,1.283559107796722,0.6269199013788553,37705,218.11601405909965,0.7845175107079869,0.9909826282986341,0.9517695665573329,0.8817969167007677,0.006619939037678343,0.0024689259053031895,0.7775658023029804,0.9980516674572558,SEKER
37366,700.27,238.9641176880686,199.22708462378893,1.1994559782838625,0.5522005725732331,37744,218.11893276048755,0.7620737477565671,0.9899851632047477,0.9575367055041601,0.9127685565127762,0.006395228755769111,0.0027382842595252907,0.8331464377584171,0.9993224755552375,SEKER
37388,707.703,232.97050158490632,204.6242163253143,1.1385284975974042,0.4780608479633755,37784,218.18313431280217,0.8069933088711418,0.9895193732796951,0.9380803196262115,0.9365268685455661,0.0062311570981305854,0.0029568509286170136,0.8770825755077641,0.9985835069617164,SEKER
37393,699.759,237.23057614327692,200.9293747121533,1.180666472899385,0.5316259544093281,37751,218.19772294018546,0.7638707305115215,0.990516807501788,0.9596286108976735,0.9197706572545841,0.006344250959892946,0.0028007756290489745,0.8459780619465297,0.9988179345486664,SEKER
37393,696.7230000000001,244.04334752025642,195.23651756165458,1.2499882223272545,0.5999899494930355,37667,218.19772294018546,0.7822803347280335,0.9927257280909019,0.9680100771773852,0.8940941236764273,0.006526444722815939,0.0025727014359405408,0.7994043019927184,0.9992459623686379,SEKER
37394,704.489,240.07197140071835,198.61765107091233,1.208714180770397,0.5617228895201555,37814,218.2006405486168,0.7587452317182047,0.9888930025916327,0.9468111310479531,0.9088967748942469,0.006420066625681081,0.002702573707657767,0.8260933474131634,0.9985107436583767,SEKER
37410,697.3449999999999,241.49487591185886,197.43391246803856,1.223168162414616,0.5758589320610402,37739,218.24731697902365,0.7530193236714976,0.9912822279339675,0.966723307675598,0.9037347734809904,0.006455356212559713,0.002656219419566631,0.8167365407987374,0.9990061337856615,SEKER
37420,704.994,238.97298057509934,199.78974036963695,1.1961223841272746,0.5486763406447863,37757,218.27648467938496,0.7558985132514544,0.9910745027412136,0.9461125546350232,0.9133939918818131,0.006386236787148566,0.002741936432976153,0.8342885844057938,0.997911250629627,SEKER
37424,695.317,238.5826817196002,199.83953088707955,1.1938713059450319,0.5462668264387444,37686,218.28815066825942,0.7813432991627868,0.9930478161651541,0.9727346204995965,0.9149371156989827,0.0063751250993907705,0.002755709649396739,0.8371099256835738,0.9994015201953969,SEKER
37429,710.889,252.612579350258,188.78381200419838,1.338105087869717,0.6644581681293935,37813,218.30273227766162,0.7708419144904852,0.9898447623833073,0.930710256202666,0.8641799740897925,0.006749113771414091,0.0023218988912269926,0.7468070276178347,0.9993062833122847,SEKER
37430,699.619,245.26131498111698,194.85037869749777,1.2587161319397866,0.6073160844376725,37742,218.30564848266556,0.7368980588258456,0.9917333474643633,0.9609626327948976,0.8900940961662593,0.006552533128002057,0.0025370712845235333,0.7922675000300302,0.9972398830994041,SEKER
37438,698.9889999999999,238.7938727775571,199.7549906305612,1.1954338263277575,0.5479418889843398,37738,218.32897672044135,0.7762227612946031,0.992050453124172,0.9629014071639376,0.9142989063367661,0.006378382199304373,0.0027494327589573,0.8359424901286068,0.9993139295643939,SEKER
37438,711.096,248.50914295969105,192.08707653508705,1.293731715024034,0.6344574560983279,37803,218.32897672044135,0.7918358714043994,0.9903446816390233,0.9303921395829767,0.8785551071489349,0.006637885115649635,0.0024394140742902935,0.7718590762974765,0.9985785665352012,SEKER
37445,703.374,241.23797124023307,197.8564001935228,1.219257860773161,0.5721183868705472,37798,218.34938688397585,0.7504609587942921,0.9906608815281231,0.9511107218821965,0.9051203082226886,0.0064424615099541475,0.002667207676627226,0.8192427723571349,0.9988681900780342,SEKER
37446,698.2959999999999,241.43305422393615,197.69453068088706,1.2212429620202827,0.5740248457826762,37754,218.352302465884,0.7497297080847315,0.9918419240345394,0.9650197204565595,0.9044010281349294,0.006447499178121459,0.00266081847731145,0.8179412196915175,0.9989049578945514,SEKER
37453,706.241,236.52257029034766,201.97970947812422,1.1710214402301864,0.5203463221644326,37925,218.37271044928218,0.7541125541125541,0.9875543836519446,0.9436058436675318,0.9232637298893493,0.0063151835711517815,0.0028305370316849864,0.8524159149291937,0.9981973123755165,SEKER
37454,698.8090000000001,245.96774205495223,193.99756626420069,1.2678908647749456,0.6147636142356514,37765,218.37562571979223,0.753162138792254,0.9917648616443797,0.963809251819553,0.8878222156099007,0.006567195548004278,0.002516887147098511,0.7882282865304729,0.9993874438491951,SEKER
37459,699.387,244.59047926298496,195.1576945400707,1.253296621685416,0.6027955152145337,37773,218.3902014886072,0.7540056360708535,0.9916871839673841,0.9623453060518382,0.8928810399598298,0.006529551756933846,0.0025599856758270916,0.7972365515197475,0.9991738767038305,SEKER
37475,713.2379999999999,241.19562614808473,198.30113251489348,1.2163098772518086,0.5692580527607275,37837,218.43683741290118,0.7774896265560166,0.9904326452942886,0.9257262066932437,0.9056417850578661,0.006436174146713402,0.002670750740295848,0.8201870428427981,0.9976016014036476,SEKER
37479,703.2639999999999,229.01636808253681,208.46678804781138,1.0985748388372178,0.4140145657859582,37879,218.44849483832377,0.7814637197664721,0.9894400591356688,0.9522721555014979,0.9538553801516736,0.006110525042891668,0.0031202430581909733,0.9098400862442938,0.9995274261134653,SEKER
37482,705.803,244.4974880171503,195.38038840705588,1.2513921689405374,0.6011848325991695,37878,218.45723749915763,0.7776348547717842,0.989545382543957,0.9455088982543992,0.8934948136720077,0.006523064084551259,0.0025644813898643773,0.7983329820587758,0.9990276419552986,SEKER
37482,693.2939999999999,239.2847356196358,199.59046682678516,1.1988785808457443,0.5515938678349211,37731,218.45723749915763,0.7615197074360016,0.9934006519837799,0.9799360548429799,0.912959353355555,0.0063839905986776534,0.0027357585865594816,0.8334947808793932,0.9992590400430216,SEKER
37483,699.8079999999999,244.46939416346024,195.45264626017533,1.2507857982031956,0.6006695424587325,37793,218.4601516416852,0.7747622984704423,0.9917974228031646,0.9618036063091282,0.8936094122915672,0.006522140548074066,0.0025654340467651483,0.7985377817360804,0.9987997167241726,SEKER
37492,701.925,242.9843492622929,196.9110602263288,1.2339801988928791,0.5858966593469804,37814,218.48637717535325,0.771440329218107,0.9914846353202518,0.9562403182608404,0.8991788065308891,0.0064809652529150994,0.0026133868662881446,0.808522526114314,0.9977007875839143,SEKER
37492,701.454,246.6305158474632,193.8404208243373,1.2723379097023604,0.6182840449798362,37828,218.48637717535325,0.7514029180695847,0.9911176905995559,0.9575249082684772,0.885885416184603,0.0065782171089155865,0.0024991836701359934,0.7847929706085672,0.9985218477732104,SEKER
37493,695.177,242.8672064423218,196.68383180856813,1.234810224150523,0.5866493713060491,37758,218.48929092922486,0.781771930190371,0.9929816197891838,0.97492064215163,0.8996245072762163,0.0064776680031558365,0.0026172400632763263,0.8093242540919751,0.9993618636057665,SEKER
37506,700.778,247.57994074556936,193.21824587465724,1.2813486615864278,0.6252460247795717,37812,218.52716619413022,0.7429726035538123,0.9919073310060298,0.9597313794563326,0.8826529545812606,0.006601075581122203,0.002471464549230421,0.779076238231029,0.9982682951311178,SEKER
37512,712.467,250.53962767725415,190.91804346928737,1.3122888917388156,0.6475448623467073,37891,218.5446448717182,0.7909919028340081,0.9899976247657755,0.9286468217250088,0.8722957198341813,0.006678919483825286,0.00238528862251936,0.7608998228410326,0.9985203852403199,SEKER
37512,704.3059999999999,243.24725574602653,196.67845469050627,1.2367763216809946,0.5884224732347265,37910,218.5446448717182,0.7757305043737205,0.9895014508045371,0.9502925125012621,0.898446497171996,0.006484518440659696,0.002606311808050744,0.8072061082806293,0.9983334014377474,SEKER
37513,706.0939999999999,232.98189290346417,205.40782205353253,1.1342406076568272,0.4719092090467166,37951,218.5475578487441,0.7541514213340839,0.988458802139601,0.9455110720500702,0.938045249461936,0.00621069743564802,0.0029663014818178935,0.8799288900381058,0.9980510789316186,SEKER
37516,708.078,244.59703523616443,195.63311158987617,1.2502844393178998,0.6002425896874766,37869,218.55629654687226,0.7790190622534159,0.990678391296311,0.9402951349597759,0.8935361638208362,0.006519805822480127,0.0025636749582535114,0.7984068760556562,0.998235693376802,SEKER
37533,703.3539999999999,237.38814631723622,201.4126248140678,1.178616020402787,0.5292711368962061,37918,218.60580923787194,0.7740678105923114,0.9898465108919247,0.9534001579336705,0.9208792125017721,0.006324784757872705,0.0028056674337925943,0.8480185240178841,0.9994882180058037,SEKER
37539,701.891,239.57290117932854,199.71878446172673,1.1995511680336672,0.5523004458786717,37844,218.62328162803996,0.7850555241859589,0.9919405982454286,0.9575318218924534,0.9125543020593674,0.006381973445731866,0.0027300438510949993,0.8327553542070592,0.9989326578253681,SEKER
37540,711.0889999999999,235.93087203941084,202.97401749666412,1.162369819296149,0.5097688738392296,38001,218.62619355730916,0.766748366013072,0.987868740296308,0.932945364828961,0.9266536069124051,0.00628478614915852,0.0028585115378144317,0.8586869072037702,0.9981117451584153,SEKER
37548,703.892,246.05992926758498,194.43185322229286,1.265533014213808,0.6128736945279392,37881,218.64948759536549,0.7827392120075047,0.9912093133760989,0.9523237483828771,0.8886025784295369,0.006553210004995871,0.0025203689736571578,0.7896145423916214,0.9992832718999253,SEKER
37553,702.511,241.559960835638,198.04922086739757,1.2196965975310388,0.5725410911559996,37880,218.66404510902007,0.7782037466843501,0.9913674762407603,0.9561989083445276,0.9052164288841031,0.006432507678098634,0.0026642181688326886,0.8194167831216886,0.9994398623333529,SEKER
37557,697.1129999999999,244.9331916570023,195.32849396208758,1.2539552560341902,0.6033498483905044,37810,218.67569042218318,0.7650953389830508,0.9933086485056863,0.9711680689861234,0.8927972927752911,0.006521638886412715,0.0025559241944095087,0.797087005986889,0.9995114406738155,SEKER
37564,736.7059999999999,236.46020557949157,202.52601702429507,1.1675547124946706,0.5161621047851123,38184,218.69606822810428,0.7662994696042431,0.9837628326000419,0.8697476861871212,0.9248747276191661,0.006294862250545511,0.002841172767928982,0.8553932617886268,0.9987184338374986,SEKER
37574,712.4699999999999,253.49931585286637,188.90444472582448,1.3419446864831304,0.6668553372477356,38001,218.7251760860624,0.7481134892981582,0.9887634535933265,0.9301738598890202,0.8628235360327866,0.006746668330570777,0.0023065191051107143,0.7444644543321214,0.9990301187665533,SEKER
37577,704.505,246.68192754503693,194.2830571331473,1.2697037569054686,0.6162056580040325,37883,218.73390768811592,0.7554380603916208,0.9919224982181981,0.9514014508349568,0.8867042262274422,0.006564705206510283,0.0025032838925676125,0.7862443848096069,0.9982974492385867,SEKER
37580,703.0400000000001,243.49361162053046,196.7097491836039,1.237831945956373,0.5893688014699462,37934,218.74263894162794,0.7988945578231292,0.9906680023198187,0.9554469299902669,0.8983506281163739,0.006479340383728857,0.0026031192366225194,0.8070338510370837,0.998972282281899,SEKER
37580,698.245,242.68658013745187,197.39858901305263,1.2294240873292395,0.5817201844619139,37888,218.74263894162794,0.7863240709742216,0.991870777027027,0.9686145105779587,0.901338008956809,0.006457865357569236,0.0026291749781254467,0.8124102063902249,0.9987966765282612,SEKER
37606,700.716,229.64382696109342,209.019181954909,1.0986734557722733,0.4141941607997138,37942,218.8182952115991,0.7857336871356637,0.9911443782615571,0.9624605499126182,0.9528594698461962,0.006106574136071197,0.0031052231460277015,0.907941169275574,0.9975308620859135,SEKER
37606,696.1360000000001,238.35598361032405,201.09867495602242,1.1852687923600158,0.536829925366119,37883,218.8182952115991,0.7806123508043591,0.9926880130929441,0.9751666017373525,0.9180314750114849,0.006338243461424349,0.00277701973026753,0.8427817891117625,0.9989229534035121,SEKER
37631,744.1279999999999,248.89972903920886,192.99272096972095,1.2896845424458225,0.6314907485528634,38388,218.89101696490175,0.7503539311279934,0.9802802959258101,0.8540048369386493,0.8794345329737989,0.006614220431006587,0.002440464462170319,0.7734050977868439,0.9974485996644923,SEKER
37637,703.3539999999999,250.54410289091163,191.52837555478752,1.3081304645600276,0.6446833233760166,37959,218.90846659094143,0.7863321076383085,0.991517163255091,0.9560419296125957,0.8737322653579097,0.006656856361849022,0.002393108799537457,0.7634080715274648,0.9986373552560972,SEKER
37642,699.339,240.4396377004602,199.76703807633112,1.2036001535377825,0.5565103081326623,37928,218.9230068835183,0.7468947180443668,0.9924593967517401,0.9671794447814254,0.9105112991238685,0.006387536201595563,0.002708036387992198,0.8290308258322346,0.9978216292592323,SEKER
37644,695.582,238.9158223067575,200.79433447575678,1.1898534036357653,0.5419051243293479,37973,218.92882273015232,0.7791530405265554,0.9913359492270823,0.9777075273504606,0.9163429220232105,0.0063467172007958105,0.002760330146990524,0.8396843507420358,0.9991012827100992,SEKER
37646,703.337,249.23792619921727,192.55072863768874,1.2944013661365752,0.6349443224060458,37941,218.93463842229244,0.8035775273224044,0.99222477003769,0.9563167720835593,0.8784162256561899,0.0066205686181590945,0.002431512188100992,0.7716150654960665,0.9987795949096714,SEKER
37652,693.787,231.77873232919086,206.94603359298583,1.1199960120281653,0.4503337043787598,37917,218.95208457187235,0.7832743915123778,0.9930110504523038,0.9829820746942269,0.9446599451622634,0.006155814626824361,0.0030238991316632515,0.8923824119939704,0.9994647426373221,SEKER
37657,704.4159999999999,252.0951069483164,190.5731440702591,1.3228259846275918,0.6546208937440811,37993,218.96662196803425,0.7474593092497023,0.9911562656278788,0.9536678864346351,0.8685873542675541,0.006694508509661322,0.0023504578604114745,0.7544439919935096,0.9979981165551852,SEKER
37663,712.3449999999999,233.56979517470614,205.82816005272664,1.13478056216833,0.4726921211548319,38084,218.9840655695305,0.7539989189405617,0.9889454889192312,0.9327043745036242,0.9375530145314133,0.006201571706308742,0.002955730755260147,0.8790056550569406,0.997478531394656,SEKER
37669,698.9899999999999,243.28546189875,197.6686076327393,1.230774399700154,0.5829659466520388,37937,219.00150778163342,0.7549502966169633,0.9929356564831168,0.9688399306543425,0.9001832911527488,0.00645850598366694,0.0026159872255962654,0.8103299576705945,0.9973333672110771,SEKER
37679,707.574,242.4523171951429,198.13085658063684,1.2236979205531662,0.5763610799528582,38045,219.0305750484991,0.7784917355371901,0.9903798133788935,0.9457263717938816,0.9033965011446258,0.006434680251470127,0.0026437497923840598,0.8161252382803519,0.9986907569946238,SEKER
37681,703.8359999999999,248.22105558837183,193.6317497971853,1.2819233201598639,0.6256824535431521,38044,219.03638803898696,0.7544347895727386,0.990458416570287,0.9558490896907075,0.8824246900400659,0.0065874328066763575,0.002463806322313519,0.7786733335923063,0.9981995051185985,SEKER
37682,715.569,246.5710052460358,194.78075851301338,1.2658899530343615,0.6131608498891697,38157,219.03929447638018,0.7744096672763517,0.9875514322404801,0.9247849934477959,0.8883416533822228,0.006543469169524861,0.0025136680669016146,0.7891508931338613,0.9989781870462483,SEKER
37688,710.5,238.5816472002305,201.47174004907734,1.18419410653878,0.5356246867989853,38083,219.05673229092687,0.777649389237372,0.9896279179686475,0.9381770194126773,0.9181625446113327,0.0063304406495497375,0.002775185343226652,0.8430224583271577,0.9983022268308545,SEKER
37690,702.993,247.2788263340442,194.41023461562028,1.2719434592677359,0.6179740833975707,37977,219.06254458731252,0.7793631100082713,0.9924427943228796,0.958371742932506,0.885892851543161,0.0065608603431691215,0.0024926732045149917,0.7848061444152732,0.9982290421821368,SEKER
37693,709.3589999999999,252.2616301354444,190.47367168195078,1.324391071521244,0.6556511105304287,38032,219.07126274274881,0.775002056090139,0.9910864535128313,0.9413224187413816,0.8684287920645125,0.006692532569321741,0.002348048757977238,0.7541685668866285,0.9988141164066229,SEKER
37693,701.429,246.67428558363787,194.8832128370698,1.265754407435121,0.6130518486320085,37995,219.07126274274881,0.7699677248028761,0.9920515857349651,0.962726959355573,0.8880993096804575,0.006544299620185124,0.002511244897084085,0.7887203838549052,0.9983263020982667,SEKER
37706,717.777,250.62713468446347,191.96843725772754,1.3055642805904786,0.6428973723042983,38097,219.1090374078259,0.7673178673178673,0.9897367246764837,0.9196895488757899,0.8742430770063326,0.006646876748646461,0.0023951140374769554,0.7643009576935004,0.9978440299857287,SEKER
37720,706.2259999999999,238.25363235634876,201.96476657022842,1.1796791905953643,0.5304949593652641,38103,219.14971053462594,0.7554273812384843,0.9899482980342755,0.9503731182455947,0.9198168706483784,0.006316374134579765,0.002789029401429234,0.8460630755293757,0.9980830041331183,SEKER
37722,699.287,237.20518644140833,202.8017110895272,1.1696409520760584,0.5186886200774857,38031,219.15552036510465,0.7986027310257224,0.9918750493018853,0.9693791301229518,0.9239069501511001,0.006288245226695518,0.0028263254492421337,0.8536040525375076,0.9984102567059521,SEKER
37733,715.1139999999999,251.95159713609755,190.79696837282592,1.3205220150237016,0.6530946599279228,38142,219.1874716800481,0.7786100449836986,0.989276912589796,0.9272154055183446,0.8699586514692695,0.006677221454326387,0.002359228404861726,0.7568280552662301,0.9994081085666316,SEKER
37735,722.21,251.77119787518328,191.26249188212978,1.3163647268087644,0.6503112436531263,38145,219.19328050964828,0.7912560285175089,0.9892515401756455,0.9091325835350121,0.8706050666618124,0.0066720868656468335,0.002364428664535042,0.7579531820972188,0.997742833485239,SEKER
37761,698.336,236.55891092635025,203.46511268447654,1.1626509714871558,0.5101198100416657,38115,219.2687812907813,0.7814938223059252,0.9907123179850452,0.9730260982843028,0.9269098358296382,0.006264635759814365,0.002852499326726144,0.8591618437577266,0.9989053523096167,SEKER
37765,704.9429999999999,237.20473018664228,202.99530769100684,1.1685232180228913,0.5173382193793982,38130,219.280394488252,0.7839128178515827,0.9904274849200105,0.9549735614379518,0.9244351675268588,0.006281073220882888,0.0028295635571132433,0.8545803789604116,0.998597014482042,SEKER
37771,712.802,242.64829862707646,198.54371693595738,1.2221404050038287,0.5748816220982401,38155,219.29781313134848,0.748592833359759,0.9899357882322107,0.9341799198680203,0.9037681878346278,0.006424195775252878,0.002643788636008158,0.8167969373418869,0.9982405398089005,SEKER
37776,700.6709999999998,246.1757026473636,196.03363130199622,1.2557830052544499,0.6048809423977548,38029,219.3123276104549,0.7355140186915888,0.9933471824134213,0.9669355952567322,0.8908772281422535,0.006516722327598571,0.0025320974227447416,0.7936622356224249,0.9966675474068941,SEKER
37777,716.007,250.17466184141185,192.70403347507929,1.2982326178126662,0.6377082653148232,38174,219.31523039100645,0.7705188871665171,0.9896002514800649,0.9259825313746038,0.876648453431437,0.006622406804177458,0.002412667654545974,0.7685125109037305,0.9977080088523352,SEKER
37784,702.2710000000001,242.2268399612273,198.87150779329843,1.2180067554623824,0.5709087654149299,38106,219.33554877920128,0.8017995076818606,0.9915498871568782,0.9627384720977368,0.9054964710529593,0.006410831038567312,0.002658527408265789,0.8199238590893628,0.9986727993356305,SEKER
37791,713.5439999999999,245.0519161757729,196.52777805706575,1.2469072748821146,0.5973451742307001,38169,219.35586528535435,0.7640101892285298,0.9900966753124263,0.9327316867251471,0.8951403796737216,0.0064843988297682755,0.0025681126827440262,0.8012762993224145,0.9991172468157375,SEKER
37810,713.0139999999999,243.74545392772924,197.75015031084337,1.2325930146934698,0.5846331167360505,38222,219.4110006048842,0.7815212897891691,0.9892208675631835,0.9345884871445421,0.9001644833545892,0.006446586985658007,0.0026109412758675873,0.8102960970930345,0.998765309110256,SEKER
37810,712.6320000000001,241.1020938059275,200.0346227844618,1.2053018145049625,0.5582575444079945,38253,219.4110006048842,0.7976793248945148,0.9884192089509319,0.9355907112625899,0.9100335759899982,0.006376675318855527,0.002697762611992928,0.828161109429144,0.9981840878973901,SEKER
37822,699.7579999999999,235.23178155076494,204.88147038657587,1.1481359495659773,0.49132379646599106,38130,219.4458157745855,0.7859280192835176,0.9919223708366116,0.9706409503789071,0.9328918666002081,0.006219443222218945,0.0029057382948407674,0.8702872347688206,0.9992080606864484,SEKER
37826,704.2249999999999,242.5862149549615,198.86573959874823,1.2198492080356733,0.5726879449371323,38170,219.45741960378618,0.7645322984881558,0.9909876866649201,0.9584675309564753,0.9046574210514419,0.006413213529185256,0.002649671676039487,0.8184050494634457,0.9983307514403802,SEKER
37833,703.9019999999999,242.01600364861875,199.2346794211538,1.2147283010756944,0.5677089248606954,38173,219.47772482866094,0.7609211584875302,0.9910931810441935,0.9595248929021577,0.906872775022428,0.006396955135691559,0.002668938242550174,0.8224182300768793,0.999014699394967,SEKER
37838,702.4699999999999,242.0141713798547,199.3740178863578,1.2138701619475893,0.5668640775943902,38142,219.49222741065134,0.7778874223921713,0.9920297834408264,0.9635682320941099,0.9069395653948962,0.0063960614033472885,0.0026693515961592035,0.8225393752786833,0.9984560046778042,SEKER
37844,703.919,245.7749898630674,196.19051820359618,1.2527363305499557,0.602322860780063,38174,219.5096292442714,0.7676890619928595,0.9913553727668046,0.9597575172273781,0.8931324923116479,0.006494424211580895,0.0025490829799362184,0.7976856488228162,0.9992897926386552,SEKER
37848,697.327,240.96212944101597,200.14627355800806,1.2039301314854525,0.556850131980645,38105,219.52122970031039,0.7957780534471521,0.9932554782836898,0.9780922930434777,0.9110196287257081,0.006366574969377932,0.0027051824267862404,0.8299567639235271,0.9992099559176925,SEKER
37849,713.6179999999999,251.88154244172134,191.670593880715,1.3141376428273512,0.6488043128024796,38243,219.52412971853727,0.775530694205393,0.98969746097325,0.9339694734878828,0.8715371820836347,0.006654906138648877,0.002368456306511137,0.7595770597542827,0.9981888068512231,SEKER
37856,708.7159999999999,248.43033028263315,194.36032380622754,1.2781946717186583,0.6228347236404276,38232,219.5444287735271,0.7446398363428931,0.9901653065494873,0.9471093235611477,0.8837263490482693,0.006562508724710301,0.002468998765055171,0.7809722600021837,0.9982345814948699,SEKER
37861,712.99,253.52017894300644,190.3512936023889,1.3318542477182556,0.6604921966504493,38226,219.5589269495048,0.7478716049382717,0.990451525139957,0.9359121107765443,0.8660412274277527,0.006696077201949406,0.002323563161269327,0.7500274076045687,0.9989271887232561,SEKER
37865,707.053,243.05802121758728,198.494562517539,1.2245072012796856,0.5771260828906637,38220,219.57052480102362,0.779821237334212,0.9907116692830978,0.9517960246823207,0.9033667093194284,0.00641906830100587,0.0026369875990419666,0.8160714115066127,0.9992853201483248,SEKER
37884,699.809,249.37101458147941,193.59150241571692,1.2881299616446078,0.6303400077809109,38145,219.62560623193943,0.7553986959382665,0.99315768777035,0.9720903793040402,0.8807182607029856,0.0065824890344599145,0.0024429687478481053,0.7756646547356921,0.9991568819537652,SEKER
37884,703.2139999999999,246.51487758731605,195.9839048680213,1.2578322579771186,0.6065850947674629,38173,219.62560623193943,0.7994935106046217,0.9924292038875645,0.9626993426618827,0.8909223182854252,0.006507097391704045,0.002528869528928975,0.7937425772190765,0.9983950181560483,SEKER
37889,707.045,240.15443139891042,201.17930078314762,1.1937333038937954,0.546118320946906,38247,219.64009904949182,0.7841428837517332,0.9906397887416006,0.952420854577734,0.9145785808326681,0.006338368164873985,0.00273552903537312,0.8364539805178971,0.9985029737187456,SEKER
37891,713.155,227.01142647574866,212.78427097407058,1.0668618758169948,0.34844706409864723,38377,219.64589590875593,0.7836652809662675,0.9873361648904292,0.9362203314445429,0.9675543619925248,0.005991170105717682,0.003238865504317965,0.9361614434107617,0.9987549535847506,SEKER
37904,710.507,231.73322265956654,208.6706859709841,1.1105212099211161,0.43490141255698217,38307,219.68357176548636,0.8093956865257314,0.9894797295533453,0.9435353707142523,0.9480020570387441,0.006113687807607813,0.003045931550545435,0.8987079001496903,0.9980341846398996,SEKER
37906,699.8159999999999,242.12581159972837,199.70930237495284,1.2123912542898918,0.5654008882906284,38203,219.68936747765258,0.7949083588474605,0.9922257414339188,0.9726354336041838,0.9073355955986769,0.006387532622796612,0.0026704514693018854,0.8232578830404059,0.9981106574233989,SEKER
37916,732.54,259.5328974307792,186.685900601953,1.3902115617405342,0.6946840730411085,38307,219.7183437453014,0.78491284726535,0.9897929882266948,0.887911519394933,0.8465914954149624,0.0068449440191681405,0.0021689286668374404,0.7167171601089423,0.9963884824812932,SEKER
37918,701.9909999999999,234.7831508541705,205.8916004904306,1.1403240845907296,0.48059315514842854,38269,219.72413854027943,0.7794840168568198,0.9908280853954898,0.9669236835021939,0.9358599104786502,0.006191865363525779,0.002929844980357227,0.8758337720411071,0.9987343443564214,SEKER
37919,701.737,243.35352288651782,198.7999406007841,1.2241126539127245,0.5767534384996589,38208,219.72703588045925,0.7534374503258623,0.9924361390284757,0.967649302430118,0.9029129033111379,0.006417719952702282,0.0026311400340718045,0.8152517109657483,0.9979599355171718,SEKER
37927,697.7479999999999,233.25987140053115,207.1627476509381,1.125974018232109,0.4596117238519843,38208,219.75021322667817,0.7918450007307347,0.9926455192629816,0.9789514523953179,0.9420832306356908,0.0061502325889348265,0.002988328908317787,0.88752081344498,0.9993253765792742,SEKER
37928,703.2650000000001,241.15315354476365,200.68436133067178,1.2016539402759472,0.5544960666282529,38236,219.75311022307568,0.7541857228077152,0.9919447640966629,0.9636776754815112,0.911259533590484,0.006358182702614523,0.0027044633829952443,0.8303939375595464,0.9978461470496877,SEKER
37937,700.0649999999999,242.41951051538058,199.49114124358732,1.215189351287413,0.5681615771804468,38213,219.7791814722629,0.7820449391877964,0.9927773270876403,0.9727385279205775,0.9066068197440683,0.006390054841325898,0.002662933214530737,0.8219359256064535,0.9988077842375256,SEKER
37951,699.2219999999999,240.52546465512663,201.14879458545047,1.1957589164321263,0.5482889277501521,38269,219.81973060270127,0.7757292071213948,0.9916904021531788,0.9754452975146257,0.9139145866234416,0.006337789904221934,0.002727344741337042,0.8352398716430962,0.9987455238768571,SEKER
37957,713.931,255.1594977962595,189.96236367474302,1.343210796393059,0.6676394281124359,38297,219.83710651187295,0.7864290894022584,0.9911220200015667,0.9358134087372462,0.8615674055269114,0.0067223304738588275,0.0022848445798995887,0.7422983942663733,0.9970632173238243,SEKER
37968,709.2679999999999,252.1497998937221,191.89992501695767,1.3139650777426846,0.6486870820853767,38292,219.8689587788705,0.7853065276743609,0.9915387026010655,0.9484334277618507,0.8719775263416526,0.00664111356652239,0.0023683279335629834,0.7603448064449075,0.9990665227116292,SEKER
37969,699.361,239.41264005658286,202.30154467157575,1.1834444489549238,0.5347804026561539,38269,219.87185421069563,0.7933181504774242,0.9921607567482819,0.9755200566816036,0.9183803084028105,0.006305476574483997,0.0027668647594996446,0.8434223908620413,0.9981435465899728,SEKER
37970,703.4159999999999,246.49836068999315,196.48919672370286,1.254513554944253,0.6038186539935717,38241,219.8747496043921,0.7500395069532237,0.9929133652362647,0.9643306621228221,0.8919927458702898,0.006491924168817307,0.002535119821679104,0.7956510586852196,0.9981550381263532,SEKER
37987,701.371,244.4664751986659,198.01096591105673,1.234610790740126,0.5864687409470439,38307,219.92396546500933,0.7758782679738562,0.9916464353773462,0.9703965660441327,0.8996078717390101,0.006435529923359726,0.002600022249811615,0.8092943228947914,0.9991635039306334,SEKER
37995,703.8599999999999,252.80312172970758,191.75958939009035,1.3183336621327362,0.6516342636042377,38262,219.9471220593998,0.7834020618556701,0.993021797083268,0.9637485608200984,0.8700332517830345,0.006653589201992567,0.0023516850121297023,0.7569578592081609,0.997923026610051,SEKER
37996,723.8239999999998,247.2044980605834,196.76459283252012,1.2563464518791556,0.6053508129368089,38627,219.95001646228,0.7678131188619003,0.9836642762834287,0.9113428381556078,0.8897492488521627,0.0065060663770024054,0.0025151782722157333,0.7916537258329878,0.9945913495671881,SEKER
37997,706.2259999999999,246.90381736928046,196.21978335479736,1.2583023645624871,0.6069741880472791,38305,219.9529108270722,0.7761776361482208,0.9919592742461819,0.9573522633610249,0.8908445125338047,0.006497981876708173,0.0025244448948213098,0.7936039455115923,0.9985937211633555,SEKER
37998,727.603,247.75758682163735,196.10551059407646,1.2633892136487523,0.6111410402267402,38651,219.9558051537779,0.7534950127902595,0.9831052236682104,0.9019482916921926,0.8877863559113766,0.006520279667920347,0.0024985028633402896,0.7881646137424014,0.9957586715817851,SEKER
38001,725.626,240.24218798567952,201.81667794349664,1.1903980901565578,0.5425010692569832,38491,219.96448790539102,0.749260617532237,0.9872697513704503,0.9069413814331042,0.9155947577304898,0.006321996473400161,0.0027406097708171846,0.8383137603835543,0.9979270993125454,SEKER
38008,715.481,255.36250597933102,189.70019656681944,1.3461372766125883,0.6694398256430558,38388,219.98474632640796,0.7604641856742697,0.990101073252058,0.9330150964320579,0.8614606341003462,0.006718651493878421,0.0022824623508733155,0.7421144241045707,0.9989878897990463,SEKER
38010,713.114,239.84701361488274,202.0040736828368,1.187337508804216,0.5391332077201823,38445,219.99053410404625,0.7526136543640107,0.9886851346078814,0.9392686091852055,0.9172118959849981,0.00631010296276987,0.002754830759786555,0.841277662136395,0.9988805235736622,SEKER
38016,702.523,242.05927301696465,200.26195766351478,1.208713206647459,0.561721907497061,38312,220.00789652340197,0.7489361702127659,0.992273961160994,0.9679550467620095,0.9089009224116061,0.006367299900488338,0.0026804100960732876,0.8261008867606684,0.998519051850797,SEKER
38017,707.111,246.26877679693223,196.80972121950455,1.2513039257967615,0.6011099181385471,38373,220.01079012674964,0.757808918213168,0.9907226435253954,0.9554600221297959,0.8933767121772228,0.006477859294445438,0.0025453633292074804,0.7981219498605844,0.9986931291251151,SEKER
38019,716.827,246.13656898096752,196.98499062826082,1.2495194085394195,0.5995895182415539,38422,220.01657721927717,0.7602735617013618,0.9895112175316225,0.9297835182519085,0.8938800850689111,0.006474041110522831,0.0025496012431009307,0.7990216064828037,0.9983930051426096,SEKER
38025,713.907,245.8047775698805,197.17538977679658,1.246630108595868,0.5971057079054276,38428,220.03393758362495,0.7895884380580589,0.9895128552097429,0.9375529531116309,0.8951572860339173,0.006464293953185549,0.0025603436680830386,0.8013065667396085,0.9989328923131803,SEKER
38042,723.1779999999999,243.92041049199676,198.8758364349051,1.2264959628307353,0.5789953364081261,38508,220.08311784599712,0.7838862559241706,0.9878986184688896,0.9140770255569927,0.9022743008757697,0.006411871365648409,0.0026213132005073387,0.814098914020859,0.9984890313914693,SEKER
38048,710.9559999999999,250.69923706379052,193.8429912774588,1.2933108151687056,0.634150864308118,38384,220.10047296197132,0.7690659551674651,0.9912463526469362,0.9459240108271239,0.8779463214160746,0.006589025364376328,0.0024147534545147465,0.7707897432880175,0.9968707112155033,SEKER
38058,702.407,243.77673697116612,198.99908770733387,1.2250143444360224,0.5776041911493918,38365,220.1293951146253,0.7431461376239944,0.9919979147660628,0.9693445298016126,0.9029959045709197,0.006405400624603661,0.0026270551075222403,0.8154016036718534,0.9988786609741569,SEKER
38061,701.644,240.18728689921673,201.96288401609974,1.1892644931732599,0.5412591323978184,38398,220.13807101945142,0.784277766330105,0.991223501224022,0.971530472707667,0.9165267398678848,0.006310587921999336,0.0027468196471967386,0.8400212648928532,0.9990074638475598,SEKER
38066,704.6949999999999,236.66274004081455,205.13896331414915,1.1536703521231606,0.4986581552008724,38393,220.15253010103856,0.7956939799331104,0.991482822389498,0.9632626634618154,0.9302373920925252,0.006217168602974165,0.002871756270841045,0.8653416056471025,0.998318954893714,SEKER
38067,707.2919999999999,247.87521090554338,195.71019638573247,1.2665421397717926,0.6136845573199287,38350,220.15542180340105,0.7868334022323275,0.9926205997392438,0.9562270485115743,0.8881703862162104,0.006511550973429568,0.002499478249679514,0.7888466349514522,0.9991075049831906,SEKER
38084,715.1659999999999,249.17457163594486,194.81925429973614,1.2790038260416559,0.623455934110593,38468,220.2045749336147,0.7685818651490384,0.9900176770302589,0.9357044650927846,0.8837361432503771,0.0065427626204165755,0.0024616788566348496,0.780989570887051,0.9988886492631694,SEKER
38090,805.2659999999998,234.89407079345244,207.54297144015257,1.1317852354310485,0.4683182468191577,39006,220.22192047787237,0.7923861035989183,0.9765164333692252,0.7381457292275805,0.9375371618959185,0.0061668172957062865,0.002938967674706529,0.8789759299358537,0.994811979800675,SEKER
38091,716.472,247.03809979763997,196.93878916554337,1.2543902643271763,0.6037152115779817,38511,220.22481126909173,0.7812737155163573,0.9890940250837423,0.93246769118148,0.8914609181720867,0.00648547162840671,0.002526565490744604,0.7947025686282201,0.9968671651230389,SEKER
38093,737.757,233.46849226157562,207.99793092510194,1.1224558399364337,0.4541923534999739,38859,220.23059273769516,0.7701156396571244,0.9802877068375409,0.879484850567465,0.9432989891027829,0.006128907995211079,0.002993369579431645,0.8898129828423321,0.9987757790426334,SEKER
38094,725.104,250.17883787737,194.25730491768826,1.2878735138602746,0.6301495755972163,38577,220.2334834150822,0.7743312464428003,0.9874795862819815,0.910470417877259,0.880304206717252,0.006567407935038851,0.0024327913614107513,0.7749354963640904,0.9980189007174771,SEKER
38095,707.2850000000001,249.07289700994497,194.92957061607444,1.277758403831449,0.6224990410158255,38413,220.2363740545281,0.7766089739669337,0.9917215525993804,0.9569493383240766,0.8842245651711135,0.00653820441028862,0.0024654066409788163,0.7818530816520447,0.9990193456424161,SEKER
38104,704.491,250.54430194690121,193.8348636511615,1.292565729546971,0.6336070300609202,38377,220.26238810243714,0.7649101676201947,0.9928863642285745,0.9647827591591587,0.8791354917707056,0.006575275612715232,0.0024227967254319828,0.7728792128909202,0.9989971836620412,SEKER
38115,711.3269999999999,238.47896062097587,203.80507994042915,1.1701325633820396,0.5192802308864781,38531,220.29417887811,0.7877604166666666,0.9892034984817419,0.946601527367861,0.9237468089616188,0.006256826987300955,0.0028102548982987274,0.8533081670667735,0.9984836728846733,SEKER
38116,722.078,250.74830560429112,194.04356440861002,1.2922268582753627,0.6333592236123387,38556,220.29706872113724,0.7565700674870981,0.9885880278037141,0.9186476232317935,0.8785585537267424,0.006578557708161694,0.0024176492672951023,0.7718651323264254,0.9974248549584738,SEKER
38117,699.123,238.59401675666217,203.59578860737574,1.1719005505402607,0.5213961778627797,38406,220.29995852625618,0.7677449242668385,0.9924751340936312,0.979989440825869,0.9233255784068392,0.006259517190667213,0.0028063385768367292,0.8525301237403242,0.9990805213634425,SEKER
38118,716.011,259.92426813684443,186.9186497841084,1.390574286926734,0.6948783033626199,38468,220.30284829346834,0.730117989580141,0.9909015285432048,0.9343306181712329,0.8475655231141547,0.006818937723302493,0.0021706490688739454,0.7183673159717706,0.9989431181589168,SEKER
38118,707.8059999999999,249.0978611579188,195.20533473192867,1.2760812172474671,0.6212036397854906,38477,220.30284829346834,0.7585671641791045,0.9906697507601944,0.9561179907797598,0.8844028096805076,0.006534914244134498,0.0024661535302391265,0.7821683297707761,0.9981103143463101,SEKER
38121,704.92,236.59813097483297,205.36399062357492,1.1520916118566724,0.4965877408552982,38440,220.31151736767902,0.7798895253682487,0.9917013527575442,0.9640387336437668,0.9311633885692598,0.006206503789901445,0.0028782622118300348,0.8670652562117865,0.9989386086139557,SEKER
38122,710.41,246.9057229779711,196.83463061770507,1.254381519162219,0.6037078724401408,38481,220.31440698327896,0.7748373983739837,0.9906707206153686,0.9492211554053703,0.8923017430541105,0.00647672532862838,0.0025326910029734575,0.7962024006574039,0.99874157689724,SEKER
38125,704.9179999999999,238.64973021930214,203.50742005475718,1.1726831884316027,0.522327067826356,38406,220.3230756026887,0.7938738963851407,0.9926834348799667,0.964145360245625,0.9232068915402815,0.006259665054932515,0.002804962174544977,0.852310964587469,0.999490739487648,SEKER
38134,717.612,247.75186889695675,196.2718315198109,1.2622894838169871,0.6102468740636063,38522,220.34907941475655,0.7784037558685446,0.9899278334458231,0.9305567021804707,0.8893942168662413,0.00649687598722811,0.0025076189580454738,0.7910220729951148,0.9984988442088467,SEKER
38145,762.9430000000001,256.113302485211,190.1054339741355,1.3472171580327164,0.6701000021033515,38876,220.38085768487875,0.7402771308802981,0.9811966251671983,0.8234994203328592,0.860481886518192,0.006714203761573234,0.0022706030166308715,0.7404290770259069,0.9975187568756292,SEKER
38148,700.346,240.67796953774703,202.09615218252492,1.1909082233311232,0.5430578758757696,38456,220.3895236905715,0.7742956888852806,0.9919908466819222,0.9773639879076002,0.9157029374722494,0.006309058654129889,0.002736293993631881,0.8385118696953063,0.9985906809808955,SEKER
38151,715.0889999999999,240.29802795401102,202.59085110777244,1.1861247763166731,0.5377856255875526,38724,220.39818935551898,0.7771960560625815,0.9852029748992872,0.937552497580706,0.9171868418233522,0.006298603652696156,0.002749510014739647,0.8412317028138949,0.9978057653306251,SEKER
38153,705.654,236.4775467754901,205.6593189101195,1.1498508700149848,0.49361947264860323,38510,220.4039662762008,0.7849119486504279,0.9907296806024409,0.9628418113352298,0.9320291472976526,0.006198137676604464,0.0028850872963519926,0.8686783314123894,0.9988505351377012,SEKER
38159,707.153,247.71441264112607,196.55993433953282,1.2602487555435904,0.6085778938567976,38483,220.42129612981833,0.750599944923089,0.9915806979705324,0.9589149128157185,0.8898202320151295,0.00649163795280605,0.0025104013398566465,0.791780045303459,0.997839816757932,SEKER
38159,701.909,243.53968314440021,199.75374327287884,1.2191995962333804,0.5720621936164881,38461,220.42129612981833,0.784486657620986,0.992147890070461,0.9732966463059974,0.9050734290358977,0.006382234417683907,0.0026417260270230306,0.8191579119467983,0.9987169954969155,SEKER
38170,723.2099999999999,247.58158392735137,196.64824725157968,1.2590073259621313,0.6075563810685892,38617,220.45306398991409,0.7691067722500957,0.988424787010902,0.9170714614785972,0.8904259375552033,0.006486287239385679,0.002515168867810245,0.7928583502710628,0.9982144714415178,SEKER
38171,707.4559999999999,233.94573544278586,208.0393399919718,1.124526425876057,0.45739579190300905,38570,220.45595175019858,0.7931801180284266,0.9896551724137931,0.9583949866515907,0.9423379799291688,0.0061288867318850925,0.0029811795877792615,0.8880008684169868,0.9985804427357888,SEKER
38172,712.28,255.3327746673524,190.54541437313145,1.340010073227753,0.6656511586178118,38486,220.45883947265673,0.744093567251462,0.9918411890037936,0.9454820303039476,0.8634177095356073,0.0066890069859413285,0.0022931117575674892,0.7454901411397143,0.9989642986191964,SEKER
38179,719.1450000000001,250.86279276237468,194.00468357694055,1.2930759615547358,0.6339795976242526,38618,220.4790524708499,0.7376729268104181,0.9886322440312808,0.9276870250548973,0.8788830341998733,0.0065707009812298565,0.002418331264849663,0.7724353878043758,0.9988176318240485,SEKER
38183,721.729,246.5615484564542,197.51350686908754,1.2483275314425755,0.5985682491712561,38626,220.49060192358021,0.7981730005435009,0.98853104126754,0.9211526358986578,0.8942619127106981,0.006457364493529953,0.00254738156144966,0.7997043685249963,0.9982929802446522,SEKER
38185,713.378,228.1868579137133,213.45532091247614,1.0690146159780087,0.35348311551329004,38677,220.49637642308818,0.7753614359974009,0.9872792615766476,0.9428947880239099,0.9662974390333504,0.005975824483795032,0.003213815272030322,0.9337307406824114,0.9981718091774698,SEKER
38187,732.3499999999999,252.53686390330833,192.80053963986813,1.3098348395446486,0.6458609860826502,38625,220.5021507713738,0.788287265445988,0.9886601941747573,0.8947218295217512,0.8731483687696382,0.0066131632205543335,0.0023710526208748717,0.76238807388508,0.9986024604280176,SEKER
38190,706.1919999999999,250.17822975055836,194.6882699781568,1.28501953291088,0.6280186503834707,38507,220.51081201028637,0.7969865186360032,0.9917677305424988,0.9623076439830862,0.8814148706310215,0.006550883208969844,0.00243893998034501,0.7768921741695005,0.9983216187734096,SEKER
38191,703.597,249.38510180258132,195.2092877288494,1.2775268262285935,0.6223206422099695,38438,220.51369901432565,0.7785660408129982,0.9935740673292055,0.9694444665698518,0.8842296409064929,0.0065299442748967375,0.0024623484716326076,0.7818620578576253,0.9988497533234089,SEKER
38192,706.3810000000001,251.309088206996,193.92900452188542,1.295881907023532,0.6360167466929644,38486,220.5165859805682,0.8143457216571782,0.9923608584939978,0.9618431297284076,0.8774715930644542,0.006580149984473083,0.002406289180100044,0.7699563966350711,0.9977725635964229,SEKER
38194,703.614,243.42454367163828,199.97696845030188,1.2172628956125713,0.5701865810564269,38483,220.5223597996693,0.769326833984611,0.9924901904737157,0.9694737703335069,0.9059167020443825,0.006373371306269002,0.0026479028688016085,0.8206850710429705,0.998989485963775,SEKER
38195,719.4569999999999,243.2856909081822,200.21206195181995,1.215140029708738,0.5681131958089465,38604,220.52524665253077,0.7785364859355891,0.9894052429800021,0.9272710339069139,0.9064456106288578,0.006369569077318555,0.0026525086919969216,0.821643645028323,0.9984120832297122,SEKER
38200,701.769,239.606249185186,203.17874734991292,1.1792879536388612,0.5300453171946988,38503,220.53968035000688,0.7585686484769053,0.9921304833389606,0.9747311997823213,0.9204254108562794,0.006272414900135759,0.0027769556303512536,0.847182936949951,0.9990726320734679,SEKER
38210,705.6299999999999,236.73101096495566,205.91602107262943,1.149648335917764,0.4933494408730236,38529,220.56854491139612,0.7821583558503235,0.991720522204054,0.9643458779385592,0.9317264519435853,0.006195525018711219,0.0028801266078107833,0.8681141812513822,0.9980260238622637,SEKER
38216,710.1460000000001,241.94926550705154,201.20459578822692,1.2025036732347278,0.5553776029238388,38542,220.5858618352477,0.7767479674796748,0.9915416947745317,0.9522693406468437,0.9117029612508528,0.0063310986368811896,0.002698188606851152,0.8312022895535738,0.9995238063892884,SEKER
38217,713.0319999999999,242.9114812612485,200.5515464879146,1.211217193360743,0.5642327726895016,38593,220.58874785705572,0.7582738095238095,0.9902573005467312,0.944601029503205,0.90810342397861,0.0063561106643966955,0.002666321197724477,0.8246518286416753,0.9988324733871743,SEKER
38218,715.6039999999999,248.50889870732354,196.2365436847729,1.266374213696502,0.6135498323597616,38565,220.5916338411057,0.76436,0.9910022040710489,0.9378476643612564,0.8876609046539744,0.0065024045922686576,0.0024902452585472577,0.7879418816511123,0.9978292808144696,SEKER
38220,709.411,253.53066059342498,192.26035943845116,1.3186840039929733,0.6518687733330752,38562,220.59740569593723,0.7559185933822511,0.9911311653959857,0.9543434786703114,0.8701014906031376,0.006633455274553244,0.0023453044018486345,0.7570766039498018,0.9983448074259271,SEKER
38222,709.963,246.2705253476579,197.70361605677863,1.2456551390386876,0.5962613163186917,38555,220.60317739975412,0.7807737876373738,0.9913629879393074,0.9529099032013824,0.8957758021928551,0.006443161669919363,0.0025590342450758554,0.8024142877942533,0.99953148122898,SEKER
38222,715.8429999999998,246.22348946564884,198.21208348915414,1.2422223969969106,0.5932628267104245,38662,220.60317739975412,0.7579369013861073,0.9886193161243598,0.9373196187385078,0.8959469215488107,0.006441931072828445,0.002560501076222308,0.8027208862327909,0.9971578634155821,SEKER
38222,701.048,241.24387592834367,201.87552646026538,1.1950129872519593,0.5474918888083407,38491,220.60317739975412,0.7923300165837479,0.9930113533033696,0.9772996941604098,0.9144405284935795,0.006311649728646948,0.0027223534865456304,0.8362014801516171,0.999271628740494,SEKER
38233,709.54,239.66968992840052,203.32352521852027,1.1787602525129224,0.5294375236517955,38594,220.63491907189004,0.7831100733275982,0.9906462144374774,0.9543209843909505,0.920579148484746,0.0062686603177464625,0.002777148063648259,0.8474659686249001,0.9989591991723956,SEKER
38240,703.058,240.67701135943,202.41271452433352,1.1890409746493293,0.5410134953136294,38518,220.65511594040285,0.7837671654027465,0.9927825951503193,0.9721772163498675,0.9168101045216728,0.006293854899566684,0.0027429257639734832,0.8405407677530407,0.999437413721571,SEKER
38241,709.687,237.38682725946327,206.3266894443388,1.150538633168462,0.49453428139621886,38572,220.6580010564252,0.7215555303973735,0.9914186456496941,0.9541252840959699,0.9295292565465164,0.0062076521863827635,0.002858639513653548,0.8640246387759196,0.9940937269211205,SEKER
38241,705.456,246.3847077292288,197.8848538896466,1.2450912886270158,0.595771529426309,38534,220.6580010564252,0.7811619070964579,0.9923963253230913,0.9656044119854331,0.8955831840786294,0.006442946254784886,0.0025567484017522315,0.8020692396044162,0.9986494231071532,SEKER
38273,710.319,248.51442620110075,196.35973754479133,1.2656078547895415,0.6129339346488083,38635,220.75030485969637,0.7829991816693944,0.9906302575385013,0.9532251806781937,0.8882796392715756,0.0064932047710161405,0.0024936626009136823,0.7890407175444405,0.9986161298730197,SEKER
38273,704.621,242.7123621732252,200.9519059724579,1.2078131879301055,0.5608128377128033,38580,220.75030485969637,0.79060111547201,0.992042509072058,0.968704248762573,0.9095140555805131,0.006341607978816011,0.0026768054903436723,0.8272158172985128,0.9991221733975244,SEKER
38276,706.425,242.76264160132482,200.95574069324198,1.208040341439665,0.5610426063465578,38627,220.75895636255188,0.7528125245850051,0.9909130918787377,0.9638385430269972,0.9093613206149391,0.006342424537603846,0.00267535231589581,0.826938011430546,0.9989744776779944,SEKER
38284,716.131,250.46165520610796,195.17927364369103,1.2832389962847055,0.6266783064596034,38694,220.7820253794248,0.7838175378252769,0.9894040419703313,0.9380850692225257,0.8815003046983003,0.006542201839047852,0.002436652338788958,0.7770427871831961,0.9971316062952348,SEKER
38285,709.2869999999999,247.613776639816,197.32691493268453,1.2548403583174965,0.6040926131014444,38609,220.78490883705277,0.7423314072982511,0.9916081742598876,0.9563007917410633,0.8916503428571786,0.0064676446817243305,0.0025217628298358336,0.7950403339173243,0.9976486974896771,SEKER
38286,725.536,263.2077967056606,185.3746671541528,1.4198692882171637,0.7099122051054886,38646,220.7877922570232,0.7352794315344728,0.9906846762925011,0.9139699696571157,0.8388345444946118,0.00687477920664631,0.0020996347201538003,0.7036433930374831,0.999081643630841,SEKER
38290,708.5329999999999,244.95770893175307,199.23852599031275,1.2294695903525368,0.5817622746769723,38631,220.79932556035894,0.7497992832944955,0.9911728922368046,0.9584623674342232,0.9013773296756101,0.006397432983331237,0.0026050258186192956,0.8124810904531337,0.9989207934485966,SEKER
38300,709.442,244.00483293142025,200.1783034883922,1.2189374606502719,0.5718092088203445,38656,220.82815618339237,0.7784552845528455,0.9907905629139073,0.9562574825722922,0.9050155012522154,0.00637088336635562,0.002636352564671146,0.8190530575067986,0.9983744540551783,SEKER
38303,704.6899999999999,245.04546200579108,199.25020461896992,1.2298379440783829,0.5821027173118078,38608,220.8368046363444,0.7536993309720582,0.9921000828843763,0.9692737187003451,0.9012074854547824,0.006397552724480878,0.0026031116618241974,0.8121749318397318,0.9988435484057765,SEKER
38307,710.914,253.19953983456577,192.82645661527593,1.3130954345115888,0.6480952699345458,38617,220.84833538011978,0.7804694185241026,0.9919724473677396,0.9524756285679842,0.8722303979083712,0.00660974599510705,0.002359877206328019,0.7607858670353957,0.9989844486451187,SEKER
38331,702.785,237.59841873644635,205.92845966949253,1.15379107442353,0.4988157720297565,38639,220.91750720403198,0.7879740980573543,0.9920287792127126,0.975247951051657,0.9297936761485037,0.006198596925111433,0.0028577189289039464,0.8645162802057487,0.9974711677952244,SEKER
38333,718.1899999999999,237.94492730823922,205.49057565930377,1.157935961514574,0.5041679670678891,38776,220.92327054507635,0.785158330260948,0.9885754074685372,0.9339077204237264,0.9284638804629248,0.006207312949892761,0.0028454008526058927,0.8620451773242723,0.9981931112739826,SEKER
38338,718.737,247.10909824465153,197.70500695098596,1.2498879115687425,0.599904330711263,38802,220.93767823994318,0.7641313880251933,0.9880418535127056,0.9326083766437112,0.8940896138967849,0.006445539627644935,0.00254075767083902,0.799396237678102,0.999155694027393,SEKER
38344,719.6049999999999,249.93029870722046,195.64780055419382,1.2774500812136171,0.6222614879998158,38741,220.9549662336764,0.7785583756345178,0.989752458635554,0.9305054806563811,0.8840663472039176,0.0065181071016904985,0.0024560697221226737,0.7815733062584779,0.9984208835542878,SEKER
38347,705.936,245.57167810563126,199.19233968236358,1.2328369579735103,0.5848558241712545,38686,220.9636097233191,0.7780189904236325,0.9912371400506643,0.9669646507268753,0.899792726212804,0.00640393454782985,0.002589384592663856,0.8096269501454701,0.9981380263107122,SEKER
38348,705.689,241.9954290780353,201.84323322918615,1.1989276291628648,0.5516454657454267,38638,220.96649081139887,0.7712791633145616,0.9924944355297893,0.9676669025270559,0.9131019195414004,0.006310509780902141,0.002705959112154777,0.8337551154701902,0.9996120438930856,SEKER
38354,715.5269999999999,253.6098213000785,192.8160003930118,1.3152944816983665,0.6495884662183491,38702,220.98377655106816,0.7963043703934393,0.9910082166296316,0.9413876042448216,0.8713533861513737,0.0066123434661333495,0.0023513239084050116,0.759256723557465,0.9986461786875159,SEKER
38376,720.9549999999999,240.80864196475673,203.7592797406816,1.181829079250902,0.5329510975270958,38872,221.047146031693,0.7256637168141593,0.9872401728750771,0.9277976181280388,0.9179369321141061,0.006274980247153344,0.0027481694022682083,0.8426082113390571,0.9958188865760873,SEKER
38377,706.076,245.3423567649872,199.3552145541347,1.230679404668217,0.5828785277817501,38698,221.05002603098995,0.7943246264022851,0.9917049976742984,0.9673374165731884,0.9009859893158735,0.006392952986554113,0.00259868370818306,0.8117757529435032,0.9990357003566044,SEKER
38380,784.252,257.65208232100736,190.13489745381892,1.3551014872668885,0.6748530842332301,39006,221.05866580375343,0.7758394145828701,0.9839511869968722,0.7841579767148612,0.8579735269841041,0.00671318609486731,0.0022439025917166656,0.7361185730055433,0.9975153730845915,SEKER
38396,709.443,250.38045589497693,195.73888967873629,1.2791553906631592,0.6235720947241158,38723,221.10473889008193,0.7484308603953063,0.9915554063476487,0.9586516656151872,0.8830750710943077,0.0065210036434778865,0.0024461591279305865,0.7798215811882165,0.9975129793323756,SEKER
38407,703.703,245.25106789514223,199.626405768329,1.2285502358829308,0.5809103729558097,38689,221.13640856865564,0.7838163265306123,0.992711106516064,0.9746337459960742,0.901673580737284,0.006385582521288885,0.0026036203905635846,0.8130152461995954,0.9988300724949319,SEKER
38411,704.9689999999999,242.8942883749366,201.47893098540982,1.2055567655981154,0.5585182171885394,38707,221.14792369095926,0.7662736648911764,0.9923528044023044,0.9712374901171652,0.9104698392478904,0.006323560656450928,0.002680425285613031,0.8289553281800794,0.9993527042661008,SEKER
38426,718.102,248.3744090761205,197.25436235885215,1.2591580034324865,0.6076806191115717,38830,221.19110006054348,0.7757813130905273,0.9895956734483646,0.9364029427789873,0.8905551134809303,0.006463707101340772,0.00250786779144538,0.7930884101470327,0.9986236190661827,SEKER
38426,721.068,230.71929188867117,212.3871880650995,1.086314546515643,0.3906396251668817,38886,221.19110006054348,0.777319253954768,0.9881705498122718,0.9287152933804342,0.9587022318327618,0.006004249515657918,0.0031287686259604762,0.9191099693211189,0.9984425295210778,SEKER
38426,709.22,244.38868005352143,200.50691799862057,1.218854104850401,0.5717287051783312,38709,221.19110006054348,0.753052305642111,0.9926890387248444,0.9600041137020414,0.9050791551069483,0.006359982305041415,0.0026325820825068725,0.8191682770091074,0.9984466169957811,SEKER
38426,711.412,246.69660841140393,198.55575547579647,1.2424550868356758,0.5934673465064951,38799,221.19110006054348,0.7520942613324982,0.990386350163664,0.9540973055743271,0.8966118402879453,0.006420043939296412,0.0025593851271319143,0.803912792144536,0.99882553797225,SEKER
38438,706.251,244.91487786383462,200.07051490572886,1.224142787752788,0.5767819206887155,38751,221.22563508899728,0.7559095378564405,0.9919227890893139,0.9683949030377325,0.9032756075030777,0.006371686296473142,0.002616467100583229,0.815906823110054,0.9987864529884622,SEKER
38445,705.779,235.18253248405378,208.47397305605256,1.1281145988464472,0.46285354739176465,38763,221.24577803280974,0.7696696696696697,0.9917963005959292,0.9698671843413464,0.9407406906285057,0.006117376316401451,0.002955457220377271,0.8849930470041982,0.9983735762030362,SEKER
38457,710.385,240.69645727590805,203.77031738363593,1.1812145182202947,0.5322515171281271,38801,221.2803045277192,0.7789863879436072,0.9911342491172908,0.9576299077586709,0.9193334502388114,0.006258846433052709,0.0027578224837723803,0.8451739927279973,0.998331790632524,SEKER
38463,714.9649999999999,228.50837751022235,214.51206491803862,1.0652472046154209,0.3446010316289303,38878,221.29756575513557,0.7914197530864198,0.9893255825916971,0.9455477264326058,0.9684439938979296,0.005940992057567593,0.0032235675467472726,0.9378837693169735,0.9990780635190802,SEKER
38472,734.036,251.05024658880313,195.38913484972812,1.2848731163167462,0.6279087495960778,38999,221.32345507209843,0.7534665099882492,0.9864868329957178,0.8972633075854256,0.8815902715865704,0.006525531466749925,0.002431435801825836,0.7772014069560831,0.9986051937614221,SEKER
38475,708.856,250.09969866821544,196.0365344245386,1.2757810650059602,0.6209709875483823,38772,221.33208417146705,0.7647584973166368,0.9923398328690808,0.9622157316262918,0.8849754132054682,0.00650031705440456,0.0024594563721109133,0.7831814819781895,0.9991681051710808,SEKER
38487,711.559,255.003869963116,192.35262948457347,1.325710340671829,0.6565154357064075,38835,221.36659720522923,0.791327411793733,0.991039011201236,0.9552171070631574,0.8680911283316912,0.00662571439611079,0.0023209925461196595,0.7535822070881889,0.9990317244831117,SEKER
38489,707.9780000000001,244.11939921007513,200.95008382187115,1.214826063105655,0.5678049793957785,38782,221.37234885439437,0.7888706702193072,0.9924449486875354,0.9649547910495921,0.9068199805943896,0.00634257578035478,0.0026456339209717183,0.8223224772052089,0.9989787775864939,SEKER
38493,728.181,243.00251494063758,201.95457021296457,1.2032533588340548,0.556152640323581,38990,221.3838517044335,0.7507606490872211,0.9872531418312388,0.912248037626656,0.9110352284152893,0.006312901435082679,0.0026825600632201236,0.8299851874136985,0.9986824645380453,SEKER
38495,797.0020000000001,250.95401706968738,195.95066759408436,1.2806999851082086,0.6247523094188588,39373,221.38960290533086,0.7654298894456375,0.9777004546262668,0.7615446396263261,0.882191907068988,0.006519132798277371,0.002435689187635364,0.778262560898018,0.996720850152368,SEKER
38495,714.189,249.51450776797319,196.65870666974834,1.2687691889837673,0.6154634608234943,38855,221.38960290533086,0.7708558612679722,0.9907347831681894,0.9483919832895754,0.8872814846950862,0.006481738089829152,0.0024780890978048286,0.7872684330827165,0.9988619313548796,SEKER
38511,711.884,248.38459998192468,197.77667839456603,1.2558841719770186,0.6049653810290556,38826,221.43560713511243,0.7642891164562992,0.9918868799258229,0.954940243358377,0.8915029641581106,0.006449705278541837,0.0025131059511122457,0.7947775351026972,0.998148526578387,SEKER
38511,711.1120000000001,249.65467038397853,196.62740161478294,1.2696840233543973,0.6161900125566425,38797,221.43560713511243,0.8050294744763578,0.9926282960022682,0.9570147802422294,0.886967613281722,0.006482684697462505,0.0024749459050592676,0.7867115470106743,0.998875082227875,SEKER
38512,710.718,246.2116356907625,199.44798017778916,1.2344654253770229,0.586336990725199,38880,221.4384820821363,0.7576627975604958,0.9905349794238684,0.9581010309244898,0.8993826853912751,0.006393114761392878,0.0025803008939813674,0.8088892147816211,0.9985457686082799,SEKER
38518,716.158,244.1767608540092,201.16127316985342,1.2138358293638112,0.5668302132835873,38895,221.45573098050318,0.7508967560823456,0.9903072374341175,0.9437476810743273,0.9069484344290623,0.00633928970491742,0.002645761813892856,0.8225554627133272,0.9984472922803649,SEKER
38533,719.241,251.8181994808516,195.15907887590384,1.290322750708286,0.631961358251771,38942,221.49884734977746,0.7841473341473342,0.9894972009655385,0.9360387201554035,0.8795982490797706,0.006535130913265295,0.002413078662100558,0.7736930797841983,0.9983137829111122,SEKER
38542,723.7639999999999,254.71159572378366,192.90092189866144,1.3204270524823818,0.6530315050200789,38941,221.5247131432126,0.7865714285714286,0.9897537300017976,0.9245920525080733,0.8697080025498335,0.006608676138336974,0.0023323197891253374,0.7563920096992214,0.998760471888368,SEKER
38543,717.5550000000001,254.9755004822309,192.93536893198655,1.3215591412485634,0.6537831192706806,38878,221.527586933834,0.7833943089430895,0.9913833016101651,0.940686668136577,0.8688191081686772,0.006615351697642397,0.0023251456148413777,0.7548466427190158,0.9975744809261037,SEKER
38548,704.398,242.2028844290159,202.96869019755334,1.1933017067473568,0.5456532808338805,38857,221.54195532776865,0.783750813272609,0.9920477648814885,0.9762824580447401,0.9146957760228388,0.006283150472891354,0.0027130882316536336,0.8366683626740234,0.9983977851604287,SEKER
38550,714.5189999999999,238.48526086482735,206.13827108824495,1.156918895292059,0.5028652374284713,38916,221.54770242442262,0.7920364891518737,0.9905951279679309,0.9488699278292526,0.928978594404604,0.00618638808987879,0.0028421026008064033,0.8630012288619539,0.998422428330661,SEKER
38552,714.493,234.99708492309892,209.03263459981977,1.1242124244043832,0.45691257521996426,38959,221.5534493719969,0.8016635475150758,0.9895531199466105,0.9489882183705866,0.9427923305708181,0.0060955873864676005,0.002970704734018001,0.8888573785831548,0.999264508526693,SEKER
38554,702.846,244.61568340397676,200.91278963494327,1.2175217110291547,0.5704381087012347,38816,221.55919617050307,0.7649603174603175,0.9932502061005771,0.9807514343730662,0.9057440352448847,0.006344754977537396,0.0026340047182735987,0.8203722573816867,0.9988210344882016,SEKER
38554,709.931,252.79709641169532,194.46872038557322,1.29993705882609,0.6389262258863523,38842,221.55919617050307,0.7738659173022883,0.9925853457597446,0.9612736236441666,0.8764309373620358,0.0065569615710871845,0.0023864547213538873,0.7681311879652968,0.9985221972761982,SEKER
38559,741.2479999999999,249.16818669789055,197.84753276702094,1.2593949654722418,0.6078758598133465,39182,221.5735625146717,0.77118,0.9840998417640754,0.8818780987343368,0.8892530200226703,0.0064619981508309485,0.0024925735791697335,0.7907709336194397,0.9958929326421067,SEKER
38559,715.7180000000001,232.60194713676717,211.3998534554849,1.1002937955477194,0.4171270886594416,39012,221.5735625146717,0.7684902840059791,0.9883881882497693,0.9459142039763518,0.9525868774623331,0.006032364613625021,0.0030639785771678185,0.9074217591134381,0.9984305314975135,SEKER
38567,707.74,245.28027589158984,200.67788929066091,1.2222585993832487,0.574994224995015,38880,221.59654672805942,0.7795092570135015,0.9919495884773663,0.9675607409254668,0.9034421782288019,0.006359848468680215,0.0026135329500486314,0.8162077694028024,0.9976169650359947,SEKER
38577,728.126,243.87711366908988,201.64386234379052,1.2094447648165667,0.5624582485352788,38948,221.6252736428054,0.7826854406752151,0.9904744787922358,0.9143768807142445,0.9087579818724714,0.006321826831248927,0.002659593799422299,0.8258410696169269,0.9988091582187059,SEKER
38579,716.173,244.75395857013697,201.0759050591349,1.2172217178291784,0.5701465377336564,39039,221.63101857893864,0.7979440721436254,0.9882169112938344,0.9452026756973976,0.9055257772896359,0.006344227651575649,0.002631248055119068,0.8199769333359994,0.9980937313755469,SEKER
38581,709.625,234.03278017434332,210.32897904516446,1.1126986934315355,0.43853134838845353,38948,221.63676336616024,0.7797922224917132,0.9905771798295163,0.9627766074699634,0.947032989143877,0.006066011253579309,0.0030098399662446414,0.8968714825267868,0.9979477267835599,SEKER
38591,715.2729999999999,254.47325758968918,193.22145155897806,1.3170031357103995,0.6507411655675215,38926,221.6654850689991,0.7907343660355709,0.9913939269382932,0.947877540850305,0.8710757553409046,0.006594108926684698,0.0023418527507757616,0.7587729715427276,0.9993063828140699,SEKER
38594,725.607,261.24360145179213,188.3145341256311,1.38727264289387,0.693102712099305,38974,221.67410085417933,0.8085899853341714,0.9902499101965413,0.9211423061989352,0.8485340870447514,0.006769021128978394,0.0021646256772304695,0.7200100968768698,0.9988503100046464,SEKER
38594,708.534,246.14409613590283,199.84169304416477,1.2316954104342244,0.583811778283381,38925,221.67410085417933,0.7659363340477892,0.9914964675658318,0.9660692659578424,0.9005867064623279,0.006377781420321885,0.0025879240226579885,0.8110564158566631,0.9989744650138837,SEKER
38600,716.5169999999999,254.129287559021,193.99164051107155,1.3100012293803829,0.6459755945882685,38940,221.69133142001127,0.715265166956973,0.9912686183872624,0.9448093248929029,0.8723564825975594,0.006583660299456503,0.0023519232635556176,0.7610058327299859,0.9969185764419237,SEKER
38602,712.975,246.95709428027143,199.2321306514464,1.239544512588279,0.5908957081965639,38979,221.6970746443596,0.7515965732087228,0.9903281254008569,0.9542695513860624,0.8977149463572637,0.006397520705669951,0.0025629804102124056,0.8058921249132248,0.9989391611742958,SEKER
38609,710.915,248.68026325132996,197.97531563140407,1.2561175238347884,0.6051600250596996,38911,221.71717475802342,0.7738204994588528,0.9922386985685282,0.9599819377053264,0.8915752776646526,0.006440992080896422,0.0025105252743365686,0.7949064757428024,0.9984959539902873,SEKER
38613,712.049,252.23187008072873,195.6011238160212,1.2895215792214638,0.6313704124796691,38925,221.72865971916852,0.7665872543180464,0.9919845857418111,0.9570258032484541,0.8790667874293704,0.0065323044073428305,0.0024062107658325196,0.7727584167613941,0.9964886539388308,SEKER
38618,706.341,241.86499939115765,203.53446343987247,1.1883245485971896,0.5402244857669051,38913,221.74301508408897,0.7914822101983932,0.992418985943001,0.9726818463220062,0.916804893813816,0.006263012051146037,0.002729422086214626,0.8405312133209626,0.998823874651481,SEKER
38625,724.328,241.4480238712055,203.97641637075552,1.1837055879653269,0.5350748376140743,39111,221.76311103381389,0.7699284390136942,0.9875738283347396,0.9251407454806391,0.9184714270103447,0.006251081524173605,0.002744084790162647,0.8435897622344188,0.9985619155072233,SEKER
38627,715.538,254.5137120241124,193.6254949674505,1.3144638420002364,0.6490257297105103,38930,221.76885239926082,0.7733287953712787,0.9922167993835088,0.948059158839171,0.8713434362163192,0.006589010589072732,0.0023429198093197546,0.7592393838372626,0.9979927174766205,SEKER
38628,720.5989999999999,251.41634811282194,196.67850322130562,1.2783112744656413,0.6229243538236736,39014,221.77172302624575,0.7402552604346326,0.9901061157533193,0.9348130715983092,0.8820895088601267,0.006508655589541833,0.002430645823586156,0.7780819016410997,0.994630867325484,SEKER
38631,710.756,236.00332477960927,208.60357062264546,1.131348442767208,0.4676740887735799,39019,221.78033468426383,0.786541789677288,0.9900561265024731,0.960958749343769,0.9397339418475248,0.006109169443700895,0.002938878194377622,0.883099881460287,0.9990936756980018,SEKER
38641,718.184,247.7468033005642,198.84969136088793,1.2458998633844192,0.5964735634410021,39027,221.80903779627965,0.7532065026704612,0.9901094114331104,0.9414272611165536,0.8953053474001152,0.00641150082297467,0.0025411141746359655,0.8015716650832411,0.9986780280200317,SEKER
38642,723.426,236.4650119009484,208.29485438712425,1.1352417350717114,0.4733588954893168,39103,221.81190790319656,0.7670107185391029,0.9882106232258394,0.9278573954229963,0.9380326760396595,0.006119378186971389,0.002922529646408809,0.8799053013181248,0.998905220967185,SEKER
38650,705.3159999999999,246.2123643191894,200.14660108323108,1.2301601075743567,0.5824000560611305,38932,221.8348674217244,0.7843734145104008,0.9927566012534675,0.9763193358691187,0.9009899565163103,0.006370306968154965,0.002589523892797119,0.8117829017432627,0.9986229417355155,SEKER
38653,713.967,250.19554288585877,196.97251141079585,1.2702053758357361,0.616602981022481,38972,221.84347662856402,0.7723031429199385,0.9918146361490301,0.9528768874012038,0.8866803703604377,0.006472862206966051,0.002467996279737521,0.7862020791825232,0.9986381074708741,SEKER
38669,721.004,248.33156069907315,198.76155260330182,1.2493943493926394,0.5994825791858358,39053,221.88938675692444,0.7407003026472053,0.9901672086651474,0.9347542683418179,0.8935206871502281,0.006421980415813006,0.002525033749370015,0.7983792183654161,0.997490484098263,SEKER
38670,711.5619999999999,245.52146975058332,200.80514175010944,1.222685174347382,0.5754001651268686,39010,221.8922558245527,0.7636255924170616,0.9912842860804921,0.9597509304916729,0.9037590726789201,0.0063491458430458576,0.0026127974672561327,0.8167804614494614,0.99866536091087,SEKER
38677,741.2959999999999,257.0073180746403,191.81327151381294,1.3398828769579303,0.6655717273954513,39266,221.91233825932682,0.7768961915474851,0.9849997453267458,0.884462310493081,0.8634475466370917,0.0066449651750301285,0.0022783283349173834,0.7455416657936126,0.9989385120555534,SEKER
38677,710.617,248.83074949885076,198.07548746551825,1.256242015015453,0.6052637959963958,38972,221.91233825932682,0.7742988128365799,0.9924304628964384,0.9624794348624792,0.8918203988303773,0.006433558691182117,0.00251038676946835,0.7953436237699735,0.9991440765544839,SEKER
38692,706.244,234.59640570345346,210.19869183309487,1.1160697702616114,0.4440513644539858,38959,221.95536592948798,0.7677288781300845,0.9931466413408968,0.9748134228974814,0.9461157994468822,0.0060631759977115025,0.0029967955651657345,0.895135105963013,0.9990332320652432,SEKER
38695,713.2139999999999,244.5323481886982,201.70088555509122,1.2123513861415758,0.565361317218747,39019,221.96397046261163,0.7735905637744902,0.9916963530587662,0.95592758893288,0.9077080071685598,0.006319481798389926,0.002646341552408229,0.8239338262779182,0.9988973163769665,SEKER
38701,718.151,248.23479684393217,199.6790344787432,1.2431690562403934,0.5940937257053138,39125,221.98117852826067,0.7646001264422317,0.9891629392971246,0.9429757228793978,0.8942387664845496,0.006414170094931195,0.002530079735498136,0.7996629714838087,0.9941162615699153,SEKER
38702,705.0360000000001,240.7685271652587,204.9088231174785,1.1750032209556007,0.5250660231084855,38966,221.98404640951176,0.7747993033172509,0.9932248627008161,0.9784095572250593,0.9219811618365982,0.006221087467450227,0.00277290033563128,0.8500492627815635,0.9988106217392708,SEKER
38702,714.602,251.905962680185,195.89630108034254,1.2859148503108864,0.6286894452380077,39018,221.98404640951176,0.7930087697729694,0.9919011738172125,0.9523899807094082,0.8812179118258445,0.0065088616267940935,0.0024211297608280123,0.7765450081227018,0.9985707578797702,SEKER
38702,708.7159999999999,251.2348757255557,196.42995481702246,1.2790049051306094,0.6234567613574294,39004,221.98404640951176,0.7510722117642492,0.9922572043892934,0.9682751754137665,0.8835717802651054,0.006491521774728844,0.002440583260477258,0.7806990908808478,0.9985179666676115,SEKER
38713,711.1629999999999,242.9600789455037,203.04924888984965,1.1965573882881237,0.5491391800444841,39057,222.01559065825165,0.7719287750992004,0.9911923598842717,0.961896589605848,0.9137945279810765,0.006275930022098615,0.002699305673283816,0.8350204393681584,0.9991498760975651,SEKER
38723,716.9939999999999,254.29115153569995,194.5626857715582,1.3069882877453218,0.6438903292021622,39073,222.04426335931245,0.7552317984124198,0.9910424078007831,0.9465592795445836,0.8731891063387617,0.006566927963631433,0.0023549150800045763,0.7624592154286851,0.9965252644487786,SEKER
38727,711.247,245.08288605555435,201.80264171187588,1.21446817532484,0.5674531501873381,39004,222.05573140308414,0.7491440177966922,0.992898164290842,0.962017172285803,0.906043400161158,0.006328475896804667,0.0026307216439133744,0.8209146429755924,0.9969747085520101,SEKER
38729,727.147,240.5189669747756,205.2125206879103,1.1720482072366323,0.5215720745682694,39234,222.061465202876,0.7827835718328078,0.9871285109853698,0.9204532046612109,0.9232596829927541,0.006210306668769542,0.0027834812090719394,0.8524084422398809,0.9990637865606228,SEKER
38746,714.4219999999999,250.53922438827846,197.05471388787947,1.2714195943103939,0.617561740088952,39096,222.11019652485254,0.7679166006025051,0.9910476775117659,0.9539532645208965,0.8865286346565541,0.00646619584959166,0.0024637673083741547,0.785933020066014,0.9992506415274741,SEKER
38747,704.737,245.5420686595716,201.2303264103772,1.2202040966669592,0.573029088182525,39008,222.11306274024798,0.7918863682812181,0.993309064807219,0.9803785486846331,0.9045825179887751,0.006337060124901841,0.002617341260453475,0.8182695318509129,0.9984558349422386,SEKER
38760,709.626,247.17377540938753,199.97856861598365,1.2360013231419424,0.5877251985450035,39056,222.15032017517981,0.7695209354960393,0.9924211388775093,0.9672407695828242,0.8987616902611856,0.006377032389303084,0.0025667087719524347,0.8077725758811434,0.9984079725868684,SEKER
38768,717.447,245.1300901293153,201.57377728474833,1.2160812454441343,0.5690347457165716,39165,222.17324472197996,0.7693895371913948,0.9898633984424869,0.9464629393246728,0.9063483173557977,0.006323000673991831,0.0026319856802281927,0.8214672723736857,0.9989709436797877,SEKER
38771,716.198,249.3478187173627,198.17116322471466,1.2582447146188303,0.6069265097726745,39156,222.18184081721662,0.7821149035745986,0.9901675349882522,0.9498404464025846,0.8910518726817542,0.006431297070422809,0.002500865195535158,0.7939734398096613,0.9990128841882384,SEKER
38776,711.692,242.08401291073227,204.08553161766812,1.1861890012088174,0.5378571804080678,39108,222.19616690359595,0.7752099160335866,0.9915106883502097,0.9620301935263028,0.9178473383351015,0.0062431404196083215,0.0027331576151953243,0.8424437364888302,0.9992974943603097,SEKER
38792,718.64,242.78168222199426,203.60179060236084,1.1924339245923072,0.544715523553953,39186,222.24200417420292,0.7609855618330195,0.989945388659215,0.9439071194528343,0.9153985677180937,0.006258550273819196,0.002710780932728924,0.8379545377803375,0.9992054181153405,SEKER
38794,721.177,254.06075926383423,194.61343953197476,1.3054635891273703,0.642826979179604,39179,222.24773316831806,0.7797788944723618,0.990173307128819,0.9373260569465336,0.8747818191691723,0.006548970440373105,0.0023656570579345336,0.7652432311489266,0.9989971750911035,SEKER
38795,715.6940000000001,249.871763199937,197.90229523860071,1.262601643395188,0.610501054836833,39140,222.25059760999665,0.8008711628579096,0.9911854879918243,0.9517674927544945,0.8894586357569381,0.006440823899985487,0.0024867046820825586,0.7911366647225934,0.9988904530289344,SEKER
38798,716.355,251.71882929219007,196.49118753344231,1.2810693062219298,0.6250335438481496,39139,222.25919071353346,0.7925399354496058,0.9912874626331791,0.9500853242446613,0.8829660909297316,0.006487933122640086,0.002432552538558436,0.779629117731731,0.9987589329630041,SEKER
38800,721.457,248.2674410200433,199.3780454917134,1.2452095234846798,0.5958743222701701,39236,222.26491926465658,0.7745129351644842,0.9888877561423183,0.936743496291363,0.8952640682622275,0.006398645387114518,0.002535551418824418,0.8014977519214345,0.9980326337441315,SEKER
38802,707.0930000000001,245.75149133487085,201.2395485334108,1.2211888424807809,0.5739730772764524,39092,222.27064766813854,0.7919583630982754,0.9925816023738873,0.9752386386930055,0.9044528945106731,0.006333474855287636,0.0026143614154910664,0.8180350383887348,0.9989752616386601,SEKER
38807,711.7159999999999,245.51752404289192,201.72411899859893,1.2170955325604726,0.5700237860722622,39161,222.2849680309882,0.7915272905278616,0.9909603942698092,0.9627343690106029,0.9053731251874103,0.006326629835928877,0.002622180499970961,0.8197004958116183,0.997653811489925,SEKER
38807,722.477,251.35156222402077,197.06495770746244,1.2754756865355297,0.6207340262205483,39200,222.2849680309882,0.7548825085589791,0.9899744897959184,0.9342688796607775,0.8843588082928782,0.006476964522483592,0.0024437979947024603,0.7820905018051997,0.9975374197229041,SEKER
38814,717.913,254.34548821172805,194.54329793472107,1.307397843625914,0.6441750282908072,39196,222.30501498920486,0.7459926965212378,0.9902541075619962,0.9463561968698919,0.8740277508054268,0.006552931628065339,0.002358936699452046,0.7639245091779933,0.9987532559922934,SEKER
38819,730.463,249.17743694319097,198.9668858209573,1.2523563200733625,0.6020017161644969,39314,222.31933313833565,0.7802814070351759,0.9874090654728596,0.9142348291150638,0.8922129381602933,0.006418955587294648,0.002509101329299851,0.7960439270206238,0.9969306430602967,SEKER
38823,724.18,255.1920319175682,193.7837191260151,1.3168909806691245,0.6506657031433072,39221,222.33078699373422,0.7485683435204288,0.989852375003187,0.930263332136241,0.8712293456934864,0.006573217729633676,0.0023360802739008377,0.7590405727975004,0.9995736842789544,SEKER
38825,721.7320000000001,249.28135487942123,198.61565665890714,1.255094180754969,0.6043051590843294,39189,222.3365137001628,0.7602012844611529,0.9907116792977622,0.9366328935215804,0.8919099216534193,0.006420640177190502,0.0025063520601130967,0.7955033083438087,0.99843157307364,SEKER
38830,710.5109999999999,249.02520038814546,198.74985514961557,1.2529578962494512,0.6025098908929397,39153,222.35082982095292,0.7651231527093596,0.9917503128751309,0.9665751880074692,0.8928848545222882,0.0064132165951106225,0.002514418108877814,0.7972433634352878,0.9989123674487148,SEKER
38830,724.3629999999999,253.4957436851408,195.34292451783983,1.2976960609698978,0.6373233754046427,39225,222.35082982095292,0.7611934446796832,0.989929891650733,0.9299610027803829,0.8771383163621397,0.006528347764232316,0.002383720741303985,0.7693716260306092,0.9984105285219267,SEKER
38834,713.685,248.80863054463867,198.81650042160808,1.251448597158776,0.601232724420224,39151,222.362282053961,0.7726006684704759,0.991903144236418,0.9580956145994592,0.8937080742223974,0.00640697920751503,0.002521249375757176,0.7987141219303063,0.9995496674205855,SEKER
38837,715.528,253.2922344855801,195.38221642306416,1.2963934953891734,0.6363860410292246,39154,222.37087084166288,0.787960558350917,0.99190376462175,0.953240032173516,0.8779221806514658,0.006521931006143114,0.002389901761140163,0.7707473552798249,0.9991918579731731,SEKER
38838,711.171,244.23925373698188,202.89699254568853,1.2037598520933417,0.5566748325837517,39190,222.3737336971798,0.7878529698149951,0.9910181168665476,0.9649807368191495,0.9104749965239053,0.0062886671233581,0.0026656950432581233,0.8289647192952055,0.9978744478893952,SEKER
38841,721.7729999999999,257.9059405611503,191.96277683557034,1.3435205762941476,0.6678307947747716,39169,222.38232204259955,0.7871473735408561,0.991626030789655,0.9369124343106285,0.8622613405443137,0.006640043782630476,0.002264156100088172,0.7434946193972768,0.9989003195242272,SEKER
38844,708.1539999999999,246.91183855415244,200.53321723970825,1.2312765034782507,0.5834274526730723,39120,222.39091005635245,0.7804701627486438,0.9929447852760737,0.973370958008385,0.9006895390622508,0.006356498778554022,0.0025804663818271667,0.81124164577617,0.9988627770872243,SEKER
38845,710.0219999999999,242.84796082717017,203.97855496833253,1.1905563350268467,0.5426739300893858,39162,222.39377265390638,0.7690860853726142,0.9919054185179511,0.9682809302715186,0.9157736877691116,0.006251717359432879,0.002712262644266793,0.8386414472102383,0.9984498877922321,SEKER
38848,709.386,245.7824019329071,201.9473772673989,1.2170616190150674,0.5699907843249005,39160,222.40236022549672,0.7742346938775511,0.9920326864147089,0.970092847564842,0.9048750377425614,0.00632677105469798,0.0026164733329273443,0.8187988339296018,0.9965286344700105,SEKER
38848,719.237,260.7438933717162,189.98178580448587,1.3724678514184145,0.684924000394808,39210,222.40236022549672,0.7280769158685834,0.9907676613108901,0.9437011565737214,0.8529532843495597,0.006711900055902908,0.0021914230580743358,0.7275293052827009,0.9985105824652803,SEKER
38852,716.9029999999999,252.0850582475063,197.16165155485496,1.278570433243558,0.6231234300085606,39209,222.41380980517044,0.7442911877394636,0.9908949475885639,0.9499537216975052,0.8822966793485889,0.006488341867793326,0.0024253368540753687,0.778447430389547,0.9952998683304974,SEKER
38854,714.487,241.10480617861262,205.4145847868608,1.1737472605890384,0.5235870724800202,39202,222.41953437398436,0.7869323935674647,0.9911229018927605,0.9564382525954997,0.9225014544472164,0.006205405007942879,0.0027721589791826337,0.8510089334572298,0.9988694043822228,SEKER
38855,727.3619999999999,255.88035937973493,193.43842311825867,1.3228000686466637,0.6546037901227258,39228,222.42239660314056,0.7897999837385153,0.9904914856734985,0.922901944240744,0.8692437244589701,0.0065855194795968325,0.0023191885450379516,0.7555846525113019,0.9994874302103157,SEKER
38865,711.9659999999999,250.40822262619508,197.8104767411699,1.2658996972837189,0.6131686837945862,39179,222.45101686917977,0.7621335425041671,0.9919855024375304,0.9634962470165606,0.8883534835086093,0.006443026440915865,0.0024752149251478137,0.7891719116618809,0.9990124840775887,SEKER
38866,727.944,250.82295741950995,197.6335924860025,1.2691311950789672,0.6157512525947079,39268,222.45387869326268,0.7549141480848419,0.9897626566160742,0.9216876511962608,0.8868960041851391,0.0064535315550741,0.0024630203131308804,0.7865845222395665,0.9982789547405194,SEKER
38867,719.7959999999999,251.85356525290723,196.74031962284843,1.280131930941817,0.6243190187724186,39272,222.4567404805293,0.7818434180881879,0.9896873090242412,0.9426967863522133,0.8832781074873484,0.006479881782821088,0.002432969759611804,0.7801802151664319,0.9987336053236068,SEKER
38871,717.084,260.50727840303904,190.16206270319267,1.3699224477262957,0.6834809717066257,39136,222.46818726146108,0.7743227091633467,0.9932287408013083,0.9499385508149601,0.8539806972965781,0.006701841434566619,0.002198700769262562,0.7292830313551497,0.9990611953992995,SEKER
38886,716.01,243.28019258251146,203.94868833132531,1.1928499985608638,0.5451656050707453,39295,222.51110744538468,0.7424251102583195,0.9895915510879246,0.9531581379913995,0.9146289514298099,0.00625624113003424,0.002700679320922994,0.8365461187935939,0.9978740365990345,SEKER
38887,710.41,246.81801463233484,201.01861741304484,1.2278365944840983,0.5802469068187656,39248,222.5139684966233,0.8082766934796616,0.9908020790868325,0.9682693213957462,0.9015305014428735,0.006347057233325657,0.002586270084405539,0.8127572450318389,0.9979330878821708,SEKER
38888,711.477,244.82227459748566,202.41859826714622,1.2094850803895811,0.5624987608515886,39192,222.5168295110754,0.7937136442494132,0.9922433149622372,0.9653921026537422,0.908891275832304,0.006295573817051164,0.0026501034188103393,0.8260833512840735,0.9991354885363121,SEKER
38890,718.332,243.01289356875785,204.09320730238824,1.1906956472525099,0.5428260070239995,39276,222.52255142962585,0.7581487835308796,0.990172115286689,0.9471033654596436,0.915682078270738,0.006248724442498273,0.0027098795853980604,0.838473668466218,0.9983669473785699,SEKER
38896,726.873,241.08404460456165,205.75805329828063,1.1716870408715916,0.5211416108296465,39321,222.53971630254878,0.7821750321750321,0.9891915261565067,0.9251192785459326,0.9230794043943048,0.006198170624345991,0.002775872630059437,0.8520755868169444,0.9983659229164705,SEKER
38897,708.832,248.95506240375204,199.05946839459187,1.2506567228957584,0.6005597011565904,39175,222.54257698598627,0.7640795961262695,0.9929036375239311,0.9728353430031682,0.8939066144598805,0.006400366671047948,0.002520886085833359,0.7990690353751254,0.999361061149729,SEKER
38898,728.2579999999999,255.20310518266328,194.6186371995843,1.3112983877332811,0.6468668816196045,39279,222.54543763265147,0.7385228782988419,0.9903001603910486,0.921651231672419,0.872032640329212,0.006560828453459388,0.0023402885559238263,0.7604409257995368,0.9971649599673362,SEKER
38899,720.474,254.55055963067494,194.9621464602013,1.305640937240285,0.642950946673005,39215,222.54829824254577,0.7623219080094852,0.9919418589825322,0.9416980584957514,0.8742793516755141,0.006543884409128125,0.0023583934949220862,0.7643643847661572,0.9979854317191793,SEKER
38927,716.92,243.51260028069925,203.7606869287971,1.1950911824604968,0.5475755663215479,39284,222.62838039635847,0.7521544228465432,0.9909123307198859,0.9517423767080493,0.9142376211322645,0.006255622069018914,0.0026957934916822177,0.8358304278935818,0.9988935744078037,SEKER
38928,717.454,252.30580542637966,196.67595712052878,1.2828502737208458,0.6263845606969178,39271,222.63123994051332,0.8017134854600874,0.9912658195615085,0.9503505559713618,0.8823865133197457,0.006481345186662034,0.002423708360923278,0.7786059588885778,0.9988348674808936,SEKER
38929,715.093,247.6372279574623,200.47036343551818,1.2352809847482291,0.587075180427652,39229,222.6340994479398,0.7503083802328271,0.9923525962935583,0.956660975165808,0.8990332402129078,0.006361253254834758,0.002563453512987633,0.8082607670077199,0.9984291562026553,SEKER
38934,708.524,242.49149718418622,204.71107565973293,1.1845548483524713,0.5360299195567112,39207,222.64839643419583,0.7953505474750776,0.9930369576861274,0.9746075176180096,0.9181699111910782,0.006228270847695747,0.0027304830174536923,0.8430359858166323,0.998622364334697,SEKER
38938,781.143,241.33528812092467,205.87681537162536,1.1722315001098775,0.5217902481356034,39426,222.6598333622339,0.7881388523428803,0.9876223811697864,0.8019040635068995,0.9226161457609418,0.006197937442111169,0.002770200179680652,0.8512205524187753,0.9978275450862195,SEKER
38940,715.812,241.5768500655957,205.47426704805815,1.1757036710056425,0.5258869764870374,39325,222.66555160596178,0.7691851851851852,0.9902097902097902,0.9550098738871399,0.92171725703643,0.006203822549193521,0.002762040260053024,0.8495627019187605,0.9988339873953591,SEKER
38944,712.5129999999999,248.5226499962449,199.83027188237608,1.2436686776992931,0.5945310201778672,39279,222.6769876528919,0.7610709400039085,0.991471269635174,0.9639729234975133,0.8960027895093525,0.006381538876238827,0.002537129464902537,0.8028209988085412,0.9984433300174442,SEKER
38945,718.24,241.87808573710933,205.26480117174668,1.1783709839989955,0.5289882017306758,39299,222.67984657285652,0.7839170692431562,0.9909921372045091,0.9486857912741437,0.9206284475679254,0.006210760963849257,0.0027520868777422464,0.8475567384713283,0.9987362679074384,SEKER
38959,718.457,258.54213230749446,192.14264758722584,1.3455739033164182,0.6690945218225982,39336,222.7198675990474,0.7729960317460317,0.990415904006508,0.9484536318162488,0.8614451563900533,0.0066362620269384345,0.0022543109573406723,0.7420877574678834,0.9985339204193872,SEKER
38971,716.5070000000001,249.87992017979596,199.05782461353513,1.255313227023004,0.6044884205179658,39315,222.7541656128433,0.7549154446661371,0.9912501589724024,0.9539168905703804,0.8914448405960956,0.006411945297267095,0.002497741411615886,0.7946739038253984,0.9975646626420294,SEKER
38974,717.63,245.8855940064036,202.11892299315963,1.2165392055583295,0.5694818257261524,39309,222.7627392911755,0.7610325704912911,0.99147777862576,0.9510069116539447,0.9059609213436639,0.006308964797208488,0.002621656125070219,0.8207651910018605,0.9984930334113341,SEKER
38976,716.184,257.74446208466486,192.8115844733229,1.3367685494038661,0.6636168325628224,39281,222.76845489341102,0.7689393939393939,0.9922354318881902,0.9549000188040586,0.8642996753126561,0.006612901839200145,0.002276298636734064,0.7470139287455625,0.998584725913689,SEKER
38986,713.852,244.3061049876192,203.53240241630442,1.2003302770824489,0.5531163195372236,39300,222.7970307051803,0.7763351786212115,0.9920101781170484,0.9613957130471272,0.9119585067940529,0.006266508618160857,0.002673657171341308,0.8316683181140385,0.9982766627225181,SEKER
38988,713.031,239.83127352860384,207.25767119263546,1.157164760891735,0.5031807834786411,39351,222.80274542773148,0.7825772782015255,0.9907753297247847,0.9636603668130482,0.9289978831770602,0.006151412576397964,0.002826269140599016,0.8630370669474587,0.9986760812149605,SEKER
38990,720.442,235.31344485428946,211.14221482312558,1.1144784336538867,0.4414604487721066,39379,222.80846000370812,0.763746057863705,0.9901216384367303,0.9439849118759356,0.9468581794876844,0.006035225566922017,0.002992354276576413,0.8965404120627317,0.9991749541430834,SEKER
38997,719.3659999999999,251.6604811902557,197.4855859301735,1.274323287975241,0.619837458195107,39347,222.82845986551436,0.7846794639623325,0.9911047856253336,0.9469809605347523,0.8854328610182371,0.00645332926097535,0.002446730470250973,0.7839913513709409,0.99905843662317,SEKER
39014,709.353,241.775143654186,205.65395831456962,1.1756406034469085,0.5258131715516763,39295,222.87702348671485,0.7624389290599961,0.9928489629723883,0.9743287643220637,0.9218359675777864,0.006197138044142769,0.0027604858772966143,0.8497815511200736,0.9990376955568532,SEKER
39023,711.172,248.19139717642292,200.43168114509467,1.2382842660325464,0.589773085641013,39313,222.90272935565469,0.7835943775100401,0.9926233052679775,0.9695745762729552,0.8981082015393459,0.006360131132317426,0.0025524690354133813,0.8065983416722385,0.9987980355006769,SEKER
39034,707.5179999999999,241.3054991511711,206.2840327681642,1.1697730353292364,0.5188477101877376,39306,222.93414361463869,0.7703876213783848,0.993079936905307,0.9798913756647191,0.9238668177842757,0.006181931115211639,0.0027780585849429182,0.8535298970028441,0.9984362583612675,SEKER
39037,712.7939999999999,250.78223126575983,198.44419199862824,1.2637418547754393,0.6114269945207661,39368,222.94271037158077,0.7414434947768281,0.9915921560658403,0.9655132276041773,0.8889892607077219,0.006424218850469038,0.0024750623762180234,0.7903019056536619,0.9987375960833229,SEKER
39040,717.134,248.73207979143345,200.08426426796663,1.2431366389628438,0.594065323087631,39366,222.9512767993508,0.7547461624714844,0.9917187420616775,0.9539355777128938,0.8963511139628618,0.006371211060231389,0.002536964587988155,0.8034453195024636,0.9987923140767206,SEKER
39052,711.179,244.5155219447582,203.60225348079516,1.200947031599639,0.5537602014904347,39399,222.9855392194695,0.7910387295414033,0.9911926698647173,0.9702760162816348,0.911948400845682,0.006261280393955705,0.002671308094087008,0.8316498858049967,0.9987674616876894,SEKER
39059,724.031,250.63703320721095,199.00089080732505,1.2594769409845537,0.6079433618489964,39468,223.00552320023536,0.7636765338442889,0.9896371744197832,0.9363035318929667,0.8897548791836696,0.0064168830028216535,0.002480763690103876,0.7916637450311466,0.9970822318802042,SEKER
39064,717.1909999999999,247.84894479684874,200.9042474753546,1.233667022531482,0.5856120073416918,39399,223.01979637586973,0.7622838855715568,0.991497246122998,0.9543702949593874,0.899821447933416,0.0063446893507282595,0.0025657567994692284,0.8096786381609893,0.998873834747413,SEKER
39070,715.4150000000001,251.97337420032724,197.7267640417923,1.274351377879573,0.6198593565531062,39403,223.03692298093338,0.7691550515788644,0.9915488668375504,0.9592618919738697,0.8851606789359084,0.0064492801177457705,0.002442190042273162,0.7835094275342784,0.9984663185599432,SEKER
39073,727.3559999999999,249.15142441797215,200.23722781114654,1.244281231524834,0.5950660026167426,39539,223.04548579031365,0.7620728662817913,0.9882141682895369,0.9280952927728561,0.8952205925025593,0.0063765624451148405,0.0025263099590866317,0.8014199092406334,0.9971917516384561,SEKER
39074,781.0219999999999,253.7038801147303,196.81827274552037,1.289026047102655,0.6310040777085286,39744,223.04833998705692,0.7286119191467144,0.9831421095008052,0.8049542569898491,0.8791680280419428,0.006492907818875219,0.002392800794449975,0.7729364215311586,0.9963351801079808,SEKER
39082,719.4999999999999,247.51614061720886,201.45851138348604,1.2286209151324954,0.5809759787262034,39529,223.07117224630264,0.7493289362681187,0.9886918464924486,0.948691583946626,0.9012388916942952,0.0063332516405815685,0.002577307314593946,0.8122315399023617,0.9979246578543156,SEKER
39085,708.8729999999999,246.3360889688538,202.29761264504643,1.2176915275865254,0.5706029962042496,39341,223.0797337410412,0.7775943020849913,0.993492793777484,0.9774242514061429,0.9055909537040954,0.006302573595211815,0.0026147248266013535,0.820094975430693,0.9986227033982346,SEKER
39087,716.009,253.83417422488967,196.49480325210496,1.2918111320186807,0.6330548163142516,39382,223.0854412216613,0.7825068567195852,0.992509268193591,0.9580876460867893,0.8788629108073294,0.006494081772069733,0.0023899128469257436,0.7724000159927318,0.9977949390308182,SEKER
39088,719.97,254.2456423266466,195.92275540290248,1.2976830680224298,0.637314046329807,39470,223.0882949072139,0.7834208522066781,0.9903217633645807,0.9475988232839473,0.87745179372867,0.006504442343600251,0.0023783890437049466,0.7699216503176605,0.9991142893211139,SEKER
39091,717.8539999999999,248.1300287768824,200.73299779271395,1.2361197785384184,0.5878319126625099,39454,223.09685574485857,0.7455561489166921,0.9907994119734375,0.9532666402278195,0.8991126823487634,0.006347497602437451,0.002558814497683803,0.8084036155603883,0.999283698236164,SEKER
39099,730.036,247.73447291037002,201.3327797951712,1.2304726193241171,0.5826881188526964,39497,223.11968303939506,0.7425082608530518,0.9899232853128086,0.9219066767519388,0.9006404333567232,0.006336082071417939,0.0025716171767713094,0.8111531901969864,0.9981017906147995,SEKER
39101,727.736,245.2697509249926,203.53884989650945,1.2050267113610078,0.5579759449739161,39601,223.1253894981241,0.7533475906980329,0.9873740562107017,0.9277906892001185,0.9097142581041696,0.0062727232276666225,0.0026500611439980695,0.8275800313980198,0.9972560436235955,SEKER
39102,715.945,254.58454929327476,195.92984691965302,1.2993658357609745,0.6385188335475759,39444,223.12824267276056,0.7519326179762317,0.9913294797687862,0.9586266859270351,0.8764406296146536,0.006510780760402914,0.0023697516966195756,0.7681481772393306,0.998105498306852,SEKER
39104,714.9989999999999,249.00669168299902,200.19423595089174,1.2438254802904571,0.5946680870298316,39434,223.13394891258434,0.7955567310235387,0.9916315869554192,0.9612142032162952,0.8960961948630992,0.0063678061498311945,0.002532725537714895,0.8029883904481254,0.9987774204168007,SEKER
39108,717.398,256.0964679836072,194.8200229036198,1.3145284769333065,0.6490695739716911,39413,223.14536095447454,0.7877213124660101,0.9922614365818385,0.9548939623031072,0.87133322341938,0.006548441955190939,0.0023283852531631546,0.7592215862344074,0.9980183954076048,SEKER
39122,725.817,245.3724593977744,203.20580179314882,1.2075071539913447,0.5605029263900956,39532,223.1852985058134,0.7907747660339983,0.9896286552666195,0.933204105641353,0.909577623558831,0.006271981478395134,0.0026481562173725666,0.8273314532789307,0.9990086485563646,SEKER
39122,711.642,241.64250263302782,206.45917793900378,1.1704129845194802,0.5196170578402308,39447,223.1852985058134,0.7916869030273596,0.9917610971683525,0.9707508280318424,0.9236177248369067,0.006176639809647457,0.002772688453446418,0.853069701632904,0.9984438554913097,SEKER
39123,714.1659999999999,246.1458369507998,202.57231225116666,1.2151010876827377,0.5680749890530935,39456,223.18815091458993,0.771748135874068,0.9915602189781022,0.9639259512917494,0.9067313657602151,0.0062915890128773305,0.0026233405037454824,0.822161769653385,0.9990096605569927,SEKER
39124,714.5889999999999,250.90051730678337,198.84739145274267,1.2617742454338983,0.6098266883688556,39451,223.1910032869123,0.7685840012572686,0.9917112367240374,0.9628097088906368,0.8895597573201101,0.006412956684050285,0.002477071713558389,0.7913165618434134,0.9984628577193195,SEKER
39139,714.71,254.91191168663542,195.7036085682054,1.3025406815520988,0.6407730685750371,39431,223.23378449820166,0.7940878104203863,0.9925946590246253,0.9628527429840156,0.8757291215666066,0.0065129898997581806,0.002362867318328382,0.7669014943598205,0.9989203951467636,SEKER
39141,713.3149999999999,254.00045029987086,196.53657628060145,1.292382594155026,0.6334731448592524,39440,223.23948804026364,0.7607580174927113,0.9924188640973631,0.9666718406797112,0.8788940640723625,0.006489370488742517,0.0023885176642524375,0.772454775861634,0.9983071070954976,SEKER
39141,711.099,249.16192991573726,200.20640422825397,1.2445252731859138,0.5952787860387263,39419,223.23948804026364,0.7593411709928996,0.9929475633577717,0.9727061132216714,0.895961466166841,0.006365752789038023,0.002530386482066083,0.8027469488558353,0.9990388658239672,SEKER
39145,716.674,252.79452323568066,197.7307919051813,1.2784782825170917,0.623052664387102,39458,223.2508946872508,0.7652083822034561,0.9920675148258908,0.9577294965100914,0.8831318488617481,0.006457900708536995,0.002423111033182837,0.7799218624739694,0.9971131632332518,SEKER
39152,721.1270000000001,243.77522168949957,204.79960825005907,1.1903109765320035,0.5424058566167412,39565,223.2708549172307,0.7874497184231698,0.989561481107039,0.9461071032399985,0.9158882242823447,0.00622637979386748,0.0027026217767577606,0.8388512393790668,0.9984938379103785,SEKER
39158,727.6779999999999,243.0275664575115,205.66390141978442,1.1816734233853874,0.5327740980251838,39634,223.2879622656347,0.7633138401559454,0.9879901095019428,0.929291310054477,0.9187762751377923,0.006206332459714784,0.002728059810590155,0.8441498437560763,0.9975094357214824,SEKER
39159,725.5189999999999,257.182799147782,194.083059427396,1.3251171941876299,0.6561272933571236,39528,223.29081336294206,0.7539276087793608,0.9906648451730419,0.9348541841771806,0.8682183027125193,0.006567654923460303,0.0023020027402619976,0.753803021165008,0.998877344376334,SEKER
39160,731.7959999999999,261.6340030848246,190.71721458257255,1.371842618703662,0.6845705718042344,39585,223.2936644238456,0.7472569411315714,0.9892636099532651,0.9189089564675955,0.8534581200878976,0.006681154317794295,0.0021865535845862726,0.7283907627439683,0.9992374914022433,SEKER
39175,719.195,259.1594303656174,192.86863451076556,1.3437095721811192,0.6679474551535908,39457,223.33642596988068,0.7563909484090207,0.9928529791925387,0.9517558399413626,0.8617723293140508,0.006615428981891957,0.0022506499596944857,0.7426515475713649,0.9979079932667649,SEKER
39180,709.775,243.84450232845444,204.6504117397398,1.1915172818638593,0.5437209772115364,39457,223.3506779992478,0.7573063244162672,0.9929796994196214,0.9773112520119581,0.9159553562474753,0.0062236983748967445,0.002702250003681776,0.8389742146384395,0.9996522757798594,SEKER
39183,721.1529999999999,254.1591215185244,196.58996860785683,1.2928387105320833,0.6338064408257917,39567,223.35922878036152,0.7537656541561665,0.9902949427553264,0.946787943971618,0.8788164967122063,0.0064864640665218175,0.002386605197166407,0.7723184348935154,0.9984831694878891,SEKER
39188,713.6689999999999,247.42832581600248,201.77531344790646,1.2262566792140435,0.5787712318479037,39536,223.3734793548275,0.7639582033686837,0.9911978955888304,0.9668727010212197,0.9027805471267542,0.0063138799075227745,0.0025870501624798313,0.8150127162704817,0.9994147869710582,SEKER
39192,709.658,242.16032017989482,206.3862512390758,1.1733355236894085,0.5231002870216191,39464,223.38487915984933,0.7829787234042553,0.9931076424082709,0.9779329619096121,0.9224668971113943,0.006178820171971189,0.0027598690739052646,0.8509451762663238,0.998444204025423,SEKER
39195,738.413,249.8854677004221,199.83151774217708,1.250480757609141,0.6004098699450199,39617,223.39342863185277,0.7540400153905348,0.9893480071686397,0.9033204970882903,0.8939832743682014,0.006375442472264884,0.002511930785122035,0.7992060948500909,0.9993918429739845,SEKER
39198,717.0989999999999,238.3108727296184,210.12342186384964,1.134147115137088,0.4717734030236341,39556,223.40197777667257,0.7976800976800977,0.9909495398928102,0.9578897781767837,0.937439300262808,0.006079669185407888,0.0028962252615470723,0.8787924416772231,0.9966799125325003,SEKER
39202,723.947,250.42617131508035,199.54137015988442,1.2550087789535773,0.6042336680138573,39642,223.4133761275449,0.7832723930548063,0.9889006609151909,0.9399495468541363,0.892132699047862,0.0063880968143227475,0.0024961408232326,0.795900752710423,0.9988624318273411,SEKER
39208,713.397,251.59022956480572,198.6111971856126,1.266747460011942,0.613849170194105,39469,223.43047256356118,0.7763960396039604,0.9933872152828802,0.9681039589676766,0.8880729309323555,0.006416808548378028,0.002462030197149985,0.7886735306547843,0.9990501917355982,SEKER
39215,709.517,244.5157546061749,204.72660343946416,1.1943526170914864,0.5467840525321304,39488,223.45041675232875,0.7732426303854876,0.9930865072933549,0.9788958158316111,0.9138487502051772,0.006235260859522502,0.0026824502683539552,0.8351195382515645,0.9974272060949897,SEKER
39215,721.7589999999999,257.1489238412432,194.5365871611904,1.3218537838754878,0.6539782798189658,39711,223.45041675232875,0.7386791742013261,0.9875097580015613,0.9459706614306858,0.8689533419563561,0.006557412312667173,0.0023062059372602065,0.7550799104971201,0.9981052368189827,SEKER
39224,715.9179999999999,247.39955571699093,202.19593027967312,1.2235634781313012,0.5762337476580044,39565,223.47605666534395,0.7784393109470509,0.9913812713256667,0.9616901782456654,0.9033001535418523,0.006307351512262669,0.002590330230916835,0.815951167388734,0.9983680483554548,SEKER
39227,726.769,265.0177468830866,188.7226378574639,1.4042711033068853,0.7020646546248135,39595,223.484602649324,0.7398528857035082,0.9907058972092436,0.9332589653766824,0.8432816491641026,0.006756003438526693,0.0021074642843694697,0.7111239398169287,0.9986107995546575,SEKER
39234,715.421,256.6452698770129,194.96170225216602,1.3163881260385413,0.6503270173954929,39502,223.5045420078513,0.7930867192237719,0.9932155333907144,0.9632723264975226,0.8708695161806685,0.006541399548274784,0.0023209340212020173,0.7584137142127517,0.998366808014454,SEKER
39245,713.9329999999999,242.41374740359115,206.4400701326894,1.1742572420547022,0.5241886745177649,39588,223.53587169206526,0.7791344054000398,0.9913357583105992,0.9675630702897794,0.9221253913454983,0.006176933301148965,0.0027549428730324842,0.8503152373640884,0.9984888255042437,SEKER
39246,715.0079999999999,247.48183905851587,202.10183972995463,1.2245402584617602,0.5771572776596251,39569,223.53871962744216,0.7788759228387712,0.991837044150724,0.9646804149356032,0.9032530244556148,0.006305912425687099,0.0025891987912498486,0.8158660261882156,0.9990607945786867,SEKER
39257,723.5260000000001,255.08066684334847,196.29999240458983,1.299443080556045,0.6385739706204546,39588,223.5700445222219,0.7604556108711233,0.991638880468829,0.942364001592107,0.8764680102530936,0.006497711665266028,0.0023652904426948672,0.768196172997017,0.9982272015106083,SEKER
39261,714.2149999999999,243.4054930902858,205.5627347919926,1.184093475583432,0.5355115240301269,39589,223.5814343049244,0.7794675296313208,0.9917148702922529,0.967193317110423,0.9185554174079049,0.006199676347782426,0.0027225146920182215,0.8437440548494105,0.9990718304094963,SEKER
39263,742.3619999999999,259.61701789354356,193.87532302718506,1.3390926387116335,0.665077521095887,39768,223.58712897869748,0.7815865432467404,0.9873013478173406,0.8952861742043269,0.861219078752302,0.006612256269096696,0.0022437993033106282,0.7416983016069636,0.9932027358268057,SEKER
39273,729.415,253.79618754027786,197.52719996308136,1.2848670339462789,0.6279041829193421,39696,223.61560017222422,0.7535400437468821,0.9893440145102781,0.9275868034963413,0.8810833698466651,0.006462358045992867,0.0024023639142451126,0.7763079046203554,0.9974524348386067,SEKER
39276,720.452,260.4767598030462,192.23673968186776,1.3549790754572135,0.674780175269339,39597,223.62414082343224,0.7456996392633377,0.991893325251913,0.9508828459753346,0.8585185910348422,0.00663195742445886,0.0022223901770940004,0.7370541711524505,0.9986929793900302,SEKER
39276,725.636,258.2334198949508,193.9547648433598,1.3314105487612187,0.6602076449119857,39601,223.62414082343224,0.7739875849837422,0.9917931365369561,0.9373450150285895,0.865976762087581,0.006574840103242459,0.0022808142142749016,0.7499157524756908,0.9984457435283418,SEKER
39277,720.1529999999999,256.9960950994994,194.86670033386417,1.318830229378284,0.6519665725941671,39599,223.62698763468373,0.7727737772006453,0.9918684815273113,0.9516968335176573,0.8701571420690404,0.006543170178463208,0.002313975386514827,0.7571734518937601,0.9985832372401946,SEKER
39282,750.1969999999999,269.8512007517088,185.81983025010547,1.4522196064246788,0.7251403605872303,39865,223.64122114736955,0.7090101797704137,0.9853756427944312,0.8771074687583561,0.8287575542535486,0.006869589143926195,0.0019990355922458766,0.6868390837323237,0.997441183854842,SEKER
39285,727.629,245.8698820336638,203.65683356343894,1.207275384437692,0.5602679493343019,39709,223.6497608201736,0.7557714505579068,0.989322319877106,0.9324308243217679,0.9096265023202481,0.006258619881218373,0.0026430827415900725,0.8274203737233684,0.9989242497784584,SEKER
39285,727.6179999999999,252.35154490132604,198.75639441197987,1.2696524589707276,0.616164984869966,39686,223.6497608201736,0.7845075485262402,0.9898956810966084,0.9324590171828498,0.8862626971735983,0.00642361066313672,0.002444605890893097,0.7854615684014212,0.997263211747869,SEKER
39288,723.891,259.4464114946947,193.03565048363848,1.3440336582629597,0.6681473399551437,39616,223.65830016691774,0.7527590435315757,0.9917205169628432,0.9421573289862957,0.8620597173743959,0.0066037062587735364,0.002249660156273817,0.7431469563196234,0.9988145223292473,SEKER
39295,732.803,244.1990998472925,205.47127870240882,1.1884828935190233,0.5403990951951588,39881,223.67822404151957,0.8053904488624718,0.9853062862014493,0.9195443492269383,0.9159666197844076,0.006214508203264856,0.002698392473888882,0.8389948485592735,0.9971310252632802,SEKER
39301,729.001,250.5915312536407,200.08005008501698,1.2524563600776821,0.602086304346447,39776,223.69530023591605,0.7649680784802242,0.9880581255028158,0.929302738386026,0.8926690344116173,0.0063762125964642305,0.002497493871730335,0.7968580049973691,0.9980298764377685,SEKER
39306,724.304,252.6462868322852,198.35598576287754,1.2737013499270367,0.6193520371864111,39704,223.70952940221457,0.7531039239730227,0.9899758210759622,0.9415143563792459,0.8854653365664551,0.006427677373232718,0.002437362306623688,0.7840488622607457,0.998644094270269,SEKER
39313,714.895,243.99366674818174,205.45733808285658,1.1875636520209576,0.539383668651669,39634,223.72944871467737,0.7699071716736516,0.9919008931725286,0.9666328079050954,0.91694777039267,0.006206437228097111,0.002706453223075144,0.8407932136280885,0.9984954593706099,SEKER
39323,747.4999999999999,249.56852915268655,200.93520168192154,1.2420348802185048,0.5930978762029596,39924,223.7579017992902,0.7686879349440926,0.9849463981564973,0.8843702270327103,0.8965789979969576,0.006346629940561161,0.0025297475549816715,0.8038538996492285,0.9984145819640077,SEKER
39325,719.707,251.6115429822778,199.3970376168022,1.2618619914796354,0.6098983035922335,39710,223.76359198205205,0.7763760562268025,0.9903047091412742,0.9540412260422086,0.8893216476869378,0.006398259198532175,0.0024687496321458475,0.7908929930446098,0.9979978072505608,SEKER
39330,724.501,245.14741367097784,204.44761390388229,1.1990720213845583,0.5517972989040273,39743,223.77781680594248,0.7862854858056777,0.9896082328963591,0.9415769794675494,0.9128296050729854,0.006233089592447949,0.002669574216555437,0.8332578878977024,0.9991362199761257,SEKER
39334,714.2209999999999,241.0411743202979,208.22536580556093,1.1575975548789772,0.5037352671449644,39735,223.78919601404553,0.8012956323337679,0.9899081414370202,0.9689753890073889,0.9284272558209172,0.006128061583370568,0.0028086292211609186,0.8619771693511589,0.9978226636024036,SEKER
39336,722.8,260.64523979747815,192.36767389027767,1.354932637726568,0.6747525095391388,39664,223.7948854011243,0.7758579881656805,0.9917305365066559,0.9461582303647297,0.8586187324004588,0.00662612466436542,0.0022214717870861667,0.7372261276289707,0.9988917417092645,SEKER
39336,729.453,236.72844367976452,211.67498016561947,1.118358171072191,0.4477317615173236,39808,223.7948854011243,0.7809410363311495,0.9881430868167203,0.9289780013873552,0.9453654234463851,0.006018111746994217,0.0029650967341424764,0.8937157838479629,0.9994943494825574,SEKER
39339,721.525,250.34786140984878,200.3269470472531,1.2496963843351376,0.5997407642045551,39685,223.80341921055756,0.7789284017107556,0.9912813405568854,0.9495774943278767,0.8939697665088704,0.006363859310349749,0.002507215468336906,0.7991819434319243,0.9987347851328043,SEKER
39341,732.7719999999999,262.04811885341684,191.55707001113967,1.367989805013085,0.6823778902389384,39772,223.80910823607252,0.7681388628553577,0.9891632304133561,0.9206986932073998,0.8540763780917112,0.006660941990631068,0.002186262249027159,0.7294464596142558,0.9978753200551912,SEKER
39343,716.2339999999999,250.62202060079017,200.33433565640547,1.251018802042169,0.6008676886249764,39669,223.8147971169813,0.7440756501182033,0.991781996017041,0.9637568329632734,0.8930372382301177,0.006370180733568619,0.002499250522530136,0.797515508865676,0.9977068965111888,SEKER
39364,714.687,249.38218842577268,201.17972639994628,1.2395990037783413,0.5909441234987819,39692,223.87452163869597,0.7847687400318979,0.9917363700493802,0.96845026483362,0.8977165652924369,0.006335285754135065,0.002538066097284714,0.8058950316004501,0.998986678321833,SEKER
39366,724.816,254.74890513756026,196.95207529236882,1.2934563129603684,0.6342568983937354,39741,223.8802088574254,0.7844332855093257,0.9905639012606627,0.941619858080413,0.878826971745114,0.0064712926164090905,0.002381136595089521,0.7723368462666874,0.9989839695355484,SEKER
39367,728.934,247.7471723058387,202.50063535464454,1.2234389875960276,0.5761157783937747,39776,223.88305241261375,0.7674477542108546,0.989717417538214,0.9310344883188035,0.9036755105169669,0.006293270310306569,0.0025888459077051396,0.8166294283081008,0.9990962810103856,SEKER
39371,717.5219999999999,251.05332055650402,199.86832853363424,1.256093561187991,0.6051400451588863,39695,223.89442627222343,0.7923005715205667,0.9918377629424361,0.960983357813183,0.891820214828953,0.00637660512957517,0.002488161328567245,0.7953432955775599,0.9990255925090104,SEKER
39383,717.4810000000001,247.28891330132396,203.04364178579485,1.2179101553064469,0.5708151064576045,39745,223.92854438482138,0.774645948072384,0.9908919360925903,0.9613861248789064,0.9055341033908878,0.006279077604583804,0.002604323064649026,0.819992012403939,0.9986765991769273,SEKER
39385,748.882,258.7458212981423,194.2559153520354,1.331984258133075,0.660575497490158,39895,223.93423023154452,0.7671107475361303,0.9872164431633037,0.8824984060757108,0.8654602772251699,0.00656965396212117,0.0022735830120165015,0.7490214914546681,0.9976848356209753,SEKER
39397,718.7959999999999,259.94231112702636,193.08399601650333,1.3462654414134276,0.6695182952897157,39682,223.96834228062502,0.7901841229090617,0.9928179023234716,0.9582122378542035,0.8616078748764302,0.006598022974516495,0.0022430152420258435,0.7423681300490783,0.9994245582917831,SEKER
39404,715.2469999999998,251.81761149922687,199.49282334100664,1.2622890752755447,0.6102465412094445,39719,223.98823857681535,0.7890584324562457,0.9920692867393439,0.9679169264002963,0.8894859944198265,0.0063906611384434795,0.002467641181815428,0.7911853342690277,0.9987046039660237,SEKER
39408,711.6339999999999,247.16999320089067,203.11255493908672,1.2169114473254337,0.5698445940050803,39687,223.99960709546636,0.7955908182423839,0.9929699901731045,0.9778694532182886,0.9062572855007028,0.00627207656315699,0.0026097394920528718,0.8213022675231023,0.999452131063199,SEKER
39417,714.1239999999999,245.98606504194257,204.31385523175203,1.2039617419137922,0.5568826600594703,39724,224.02518415309004,0.7746747376282379,0.9922716745544256,0.9712838633404057,0.9107230692717979,0.006240608494861166,0.002648207745725473,0.8294165089038441,0.9985857448319286,SEKER
39420,720.4869999999999,251.85920887026637,199.7966877897501,1.260577498338224,0.6088476088599798,39812,224.03370919006835,0.7404207362885049,0.99015372249573,0.9542764049690998,0.8895196256471566,0.006389122497977331,0.0024674201976310427,0.7912451644114575,0.9974258499260118,SEKER
39430,755.5319999999999,236.7695238745319,213.26004649387215,1.1102385456965342,0.43442640279969624,40085,224.06212363741326,0.7828072265237245,0.9836597230884371,0.8680223638046214,0.9463300849316549,0.00600480659078194,0.0029706355541985817,0.8955406296467532,0.9942637262711699,SEKER
39436,726.064,256.8395269326223,196.21515008213728,1.3089688886159256,0.6452634881666997,39794,224.07917057632974,0.7793675889328063,0.9910036688948083,0.9400542432906936,0.8724481517796648,0.006512818920088809,0.0023275942409000084,0.761165777543753,0.996342321883923,SEKER
39436,717.9029999999999,242.90956642848676,207.02738193220267,1.1733209595822198,0.5230830505848273,39765,224.07917057632974,0.7624018868654062,0.991726392556268,0.9615484798215216,0.9224798095479672,0.006159589370841027,0.002751433378142011,0.8509689990236537,0.9984597625091545,SEKER
39444,726.844,250.94920759061856,200.45336863897282,1.251908158463485,0.6016223809089511,39776,224.1018978110934,0.7462257368799425,0.9916532582461786,0.9382280107815916,0.893016957346516,0.0063621642731624215,0.002495878638831309,0.7974792861084293,0.9983708244847784,SEKER
39445,725.3069999999999,258.5095736205387,194.66685002316268,1.3279588876574495,0.6579800494636664,39899,224.1047385533793,0.7531840140535793,0.9886212687034763,0.9422325141978222,0.8669107894717215,0.006553671533034318,0.0022832952140170587,0.7515343169024835,0.9980066755102232,SEKER
39446,724.726,253.94898564077397,197.85998956280216,1.2834782120524109,0.6268588735109217,39830,224.10757925965652,0.7726328984996278,0.9903590258599045,0.9437677875704223,0.8824905470450277,0.00643788940933869,0.0024085935723298538,0.7787895656238323,0.99955943925195,SEKER
39450,747.7059999999999,255.74936077997717,196.55718029936156,1.3011448393310507,0.639784989492102,40001,224.118941724706,0.7485200364298725,0.9862253443663909,0.8867376329446934,0.8763225880260047,0.006482873530544415,0.0023583232729199066,0.7679412782845951,0.9992028311492911,SEKER
39452,735.6919999999999,261.3192102984216,192.62652962471472,1.356610695357164,0.6757497094646295,39950,224.12462274121432,0.7364294780855671,0.9875344180225282,0.915981751252476,0.8576660800607359,0.006623725293988177,0.0022108282897755323,0.7355911048867486,0.9979107602989565,SEKER
39454,717.9929999999999,255.60586244853363,196.912327525942,1.298069377677023,0.637591242882844,39779,224.13030361372626,0.7965677367252171,0.9918298599763694,0.9617462109323981,0.8768590104573795,0.0064785791668407165,0.002362536947657349,0.7688817242202948,0.9980618212658744,SEKER
39455,726.2049999999999,248.36342074137164,202.6170370300552,1.2257775771567059,0.5783218659107549,39861,224.13314399598698,0.7815811889621838,0.9898146057549986,0.9401419727334787,0.9024402358726715,0.0062948528891489455,0.0025753671353212675,0.8143983793219233,0.998271272245575,SEKER
39462,720.25,233.52366981392242,215.4661436677742,1.0838067913536849,0.3855817439081112,39808,224.15302566402931,0.7760777218376337,0.9913082797427653,0.955921924278513,0.9598728293480491,0.005917684603261934,0.0030987487985273923,0.921355848520629,0.9985717258800947,SEKER
39488,741.6959999999999,245.0219110389376,205.62157869014294,1.191615746750822,0.5438280077440589,40042,224.22685642558992,0.7465214761040533,0.9861645272463913,0.9020344586186564,0.9151298162471558,0.006204971410021718,0.0026844194052533968,0.8374625805845531,0.9979335983391325,SEKER
39493,720.3489999999999,246.9105922909796,204.10219820700144,1.209739995257482,0.5627547584863088,39854,224.24105186211062,0.7999716415491817,0.99094193807397,0.9564099244012242,0.908187250216656,0.006252009021623569,0.002623620172499174,0.824804081456091,0.9977984855890433,SEKER
39504,725.338,243.698842715544,206.71368074850218,1.1789197591234406,0.5296213991933264,39885,224.27227865970832,0.7678134110787173,0.9904475366679203,0.943561203534053,0.9202845453045043,0.006168966249380924,0.0027294847500288805,0.8469236443263183,0.9984550187651297,SEKER
39506,725.6919999999999,243.18208429612721,206.99657603599968,1.1748121101956506,0.5248415559245698,39972,224.2779557921539,0.7741720556535371,0.9883418392875013,0.9426885942179394,0.9222634818733052,0.006155573439379517,0.002747061169388273,0.8505699299970723,0.9992598543288274,SEKER
39509,737.717,261.8813448429703,192.28282997233512,1.3619590728961537,0.6788938280819032,40027,224.28647122138585,0.7733215893521237,0.9870587353536363,0.9122761447538306,0.8564431015728625,0.0066283971966633,0.00219979570638546,0.7334947862317445,0.9989898790303492,SEKER
39514,721.708,258.22340644896093,195.14281761931292,1.3232534489314713,0.6549027955566796,39854,224.300662885033,0.7633342992369362,0.9914688613439052,0.953318060453863,0.8686302530416316,0.0065349852317902754,0.0022949021750471883,0.7545185164991689,0.9984192292401824,SEKER
39515,714.776,238.95128843383597,210.64370343029321,1.1343860962495391,0.47212039945707035,39852,224.30350111001377,0.796207862338552,0.9915437117334136,0.971923150242403,0.9386996930636845,0.006047103338829203,0.0028962353931882767,0.8811571137578557,0.999572378458285,SEKER
39524,721.5429999999999,248.86823064722049,202.45887453075272,1.2292285592520094,0.5815392334525995,39875,224.3290435189179,0.750693257359924,0.9911974921630095,0.9539954845595757,0.9013968674728605,0.006296635731383981,0.002564203627186556,0.8125163126898859,0.9987682564165435,SEKER
39528,718.837,245.45606428971652,205.12414859369107,1.1966219773368307,0.5492078257783214,39899,224.3403947671741,0.7705864004990642,0.990701521341387,0.9612887479300972,0.9139737305588865,0.006209675781464191,0.002672905113619644,0.8353479801517282,0.9995957517734885,SEKER
39535,723.8249999999999,254.5019092019813,198.2914786007275,1.2834737579139097,0.626855512794544,39943,224.36025806970505,0.7479473305838283,0.9897854442580677,0.9482534885848156,0.8815661099486888,0.006437382299278647,0.002398328173566352,0.7771588062100637,0.9974629335023183,SEKER
39569,726.2909999999999,258.1734880927066,195.81745600860734,1.3184395985685684,0.6517052033188755,39908,224.45671196385652,0.7341187384044527,0.9915054625638969,0.9426351143215961,0.8694026393727042,0.006524640200477813,0.0022994297586000577,0.7558609493482245,0.99655700663233,SEKER
39573,719.251,245.37965612081908,205.81015815595026,1.1922621231109762,0.5445294338960707,39935,224.4680567559772,0.7797328184110971,0.9909352698134468,0.9612755370152415,0.9147785937292799,0.006200683701534356,0.0026784485875396584,0.8368198755453191,0.9977086414791251,SEKER
39579,721.252,242.04614185456936,208.45983545018802,1.1611164392020585,0.5081983341524987,39904,224.48507286916208,0.7690469250947246,0.9918554530874097,0.9560940605797057,0.9274474327462793,0.006115519387922114,0.002791067396690373,0.8601587405076642,0.9987444539267863,SEKER
39581,717.629,237.01363438506195,212.80379600807848,1.1137660080841059,0.4402919603344853,39918,224.49074462026817,0.775322716499187,0.991557693271206,0.965821046756235,0.9471638422942008,0.005988065849399003,0.002972807395960337,0.8971193441495138,0.9991810307084351,SEKER
39598,715.191,245.7534218519054,205.33124617700835,1.1968632462301942,0.5494640741148311,39879,224.53894872031216,0.7839946147145007,0.9929536848968129,0.9728346574745315,0.9136757772415581,0.006206207936054987,0.002667930613429968,0.8348034259179652,0.9991455383082635,SEKER
39614,720.7239999999999,249.8716832219577,202.01262132338988,1.2369112463619445,0.5885436481943473,39972,224.58430783369243,0.7554157131960335,0.991043730611428,0.9583421565943039,0.8987985550735541,0.006307661009288578,0.0025392038630378854,0.807838842602309,0.9992249496628127,SEKER
39621,733.7649999999999,256.3900083342381,197.0049404536719,1.301439485445449,0.6399939534198221,40021,224.60414956530053,0.7838912630579298,0.9900052472451962,0.9247435519476594,0.8760253608342627,0.006471063535353426,0.0023508349736801534,0.7674204328248001,0.9987512532158316,SEKER
39622,723.79,250.3520464968414,201.72655082860996,1.241046582457777,0.592226515827364,39956,224.60698395530048,0.7975442834138486,0.9916408048853739,0.950432110520608,0.8971645612576779,0.006318511092242729,0.0025251254323198124,0.8049042499766816,0.998923668639301,SEKER
39628,723.6089999999999,250.11486236887606,201.87032772086837,1.2389877462066476,0.5904004285060108,39976,224.62398954422707,0.7525542177826731,0.9912947768661197,0.9510516397409812,0.8980833342600234,0.006311569152338651,0.002532699453536138,0.8065536752756008,0.9993101203244051,SEKER
39629,719.7639999999999,245.41390471740624,205.86078520202673,1.192135279560714,0.5443919487029356,40002,224.62682368388187,0.7496405871670703,0.9906754662266887,0.9612641271968742,0.915297867667846,0.006192785705352298,0.0026811160786871973,0.8377701865573061,0.9987353955591255,SEKER
39635,717.433,251.5773743611473,200.8551509868074,1.2525313546859023,0.6021496944728205,39904,224.64382777093647,0.7641218430692115,0.99325882117081,0.9676672171731846,0.8929413002317654,0.006347353963949724,0.002489224815605797,0.797344165659596,0.9986985679645142,SEKER
39645,715.39,251.01469234631085,201.26199346422945,1.247203647473183,0.5976009517750849,39941,224.67216505616696,0.77226507713885,0.9925890688765929,0.9734475490181619,0.8950558350034723,0.006331559902795078,0.002506634399572577,0.801124947773763,0.9991659569452002,SEKER
39668,716.4949999999999,251.66180993956243,200.9251847495406,1.2525150107651593,0.6021358811093344,39938,224.73732725240467,0.8015356637704587,0.9932395212579498,0.9710103083970437,0.8930132359231471,0.00634420212613599,0.002488790597985768,0.7974726395339304,0.9988464516907607,SEKER
39669,715.564,248.0761897079123,203.90095327205196,1.216650465468497,0.5695903131926947,39958,224.74015996278717,0.777411958374978,0.9927674057760648,0.9735632021529723,0.9059320051126178,0.006253653727291142,0.0025983401506467162,0.8207127978873684,0.9985206075656193,SEKER
39670,722.0870000000001,249.93976683455674,202.26360165176035,1.235713023962072,0.5874652662106552,40041,224.74299263746556,0.7963464819833384,0.990734497140431,0.9560773109373406,0.8991886144561793,0.006300473073722126,0.002540715981973956,0.8085401643676234,0.9991236115055065,SEKER
39676,721.502,240.62433666830913,210.23380448218703,1.144555877971076,0.4864627169979653,40044,224.75998793582525,0.7735620978748294,0.9908101088802318,0.9577731699870956,0.9340700572845537,0.0060647327519989195,0.0028477983410940756,0.8724868719155696,0.9986099777035626,SEKER
39686,715.976,239.59910805558445,211.26042405271693,1.13414099744397,0.4717645140081528,40005,224.78831057766254,0.7804523107177974,0.9920259967504061,0.9728598102568774,0.9381850892596564,0.006037371064243926,0.002885238622109036,0.8801912617091492,0.998260995496281,SEKER
39698,742.795,251.14066016610022,201.89318137869148,1.2439283905038632,0.594757999260392,40263,224.82229303807148,0.7450825825825825,0.9859672652311054,0.9041501278063269,0.8952046748996271,0.006326279917529856,0.0025062104285720993,0.8013914099621472,0.9968735267578354,SEKER
39701,718.722,253.70538138508454,199.3061297057437,1.2729431942693188,0.6187588197409486,40020,224.83078785062042,0.7776276099815881,0.9920289855072464,0.9658049624137937,0.8861884861218727,0.006390402795523653,0.002431153656105499,0.7853300329349767,0.9996805206798786,SEKER
39703,720.914,248.61208930475397,203.45315346886386,1.2219623292435287,0.5747118672728078,40053,224.83645088067942,0.7637689244560721,0.9912615784086086,0.9599890265696364,0.9043665234037358,0.006261796068426919,0.002583786315437873,0.8178788086533596,0.9994170940609816,SEKER
39706,720.9459999999999,254.16953076952709,199.07321380660844,1.2767640905041222,0.6217320096112382,40009,224.84494515833433,0.7831249260384205,0.9924267039916019,0.9599763394038775,0.8846258813068221,0.006401287734083693,0.002418163584423858,0.7825629498778716,0.9991482729630438,SEKER
39709,719.045,253.66621731430953,199.5592513593172,1.2711323358172448,0.6173353003600547,40046,224.8534391151013,0.7723382736219707,0.9915846776207361,0.965131905667121,0.8864146022112702,0.006388129071855487,0.0024327700026542166,0.7857308470133645,0.9987678868877602,SEKER
39721,739.568,257.06320431162203,197.12887500169967,1.3040362773307848,0.64182656176617,40255,224.88741173401723,0.7845503565150408,0.9867345671345175,0.9125860260484305,0.8748331459425829,0.006471720357282597,0.0023383010427477143,0.7653330332397966,0.9980220395843021,SEKER
39728,727.9169999999999,249.82759534317657,202.92179975553924,1.2311520775202316,0.5833131738582329,40129,224.90722672524006,0.7675573330242084,0.9900072266939122,0.9421994403499291,0.9002497358880449,0.006288451352778307,0.0025478595199034753,0.8104495869664946,0.9977866927192136,SEKER
39733,727.1569999999999,256.3330273516266,197.83578794923437,1.2956858312076625,0.6358750348445888,40033,224.92137922163428,0.7610519460619062,0.9925061823995204,0.9442888090980722,0.8774576633587557,0.006451388703385764,0.0023590527779188755,0.7699319509870075,0.9975899198879381,SEKER
39746,727.669,233.93854150518803,216.49760090213692,1.0805595098069234,0.3788783494956649,40185,224.95817154538702,0.7827405569341053,0.9890755256936667,0.9432689635234901,0.9616122683247478,0.005885838612821115,0.0031044744813799063,0.9246981545926668,0.9991913846460188,SEKER
39754,721.2919999999999,252.45771871497578,201.19182211542469,1.2548110358588016,0.6040680459118446,40091,224.9808099847666,0.7919123505976096,0.9915941233693347,0.9602149572286833,0.8911623345482633,0.006350498533857619,0.0024706707457332394,0.7941703065175109,0.9965336649695398,SEKER
39755,737.9430000000001,266.0855742051908,190.75527721716435,1.3949054416055138,0.6971816951605504,40208,224.9836396295215,0.7330272522771693,0.9887335853561481,0.9173941932739615,0.8455311427594577,0.00669313480581539,0.002110220160614027,0.7149229133761145,0.9972498621968094,SEKER
39757,719.823,247.9948931514366,204.46809357371717,1.212878199316837,0.5658836669939911,40101,224.98929881226763,0.7757463414634146,0.991421660307723,0.9642108880757475,0.9072335964389366,0.006237766761864241,0.002606666032818125,0.8230727985075273,0.9982870537604795,SEKER
39764,722.344,252.75783021741123,200.55773031966436,1.2602746840749859,0.6085991787716338,40089,225.00910483100236,0.7674225610344495,0.9918930379904712,0.9576609738685506,0.8902161592282201,0.006356448803375194,0.0024624998318652684,0.7924848101510437,0.9987485437473317,SEKER
39765,736.601,253.96810948449928,199.93839095001,1.270231836306006,0.6166239196954902,40214,225.0119341199345,0.7497596017874314,0.9888347341721788,0.9209716095897463,0.8859849946383441,0.006386724744989294,0.0024275234192097503,0.7849694107243069,0.9970931360283796,SEKER
39767,724.3860000000001,251.40683471332162,201.62504026124375,1.246902837006634,0.5973413420058005,40117,225.01759259107547,0.7848543459382648,0.9912755191066132,0.9523412520505666,0.8950337123796268,0.006321996497430573,0.00250260085579206,0.8010853462960564,0.9988755909809944,SEKER
39774,719.525,241.50726230858768,209.9863068600422,1.1501095758094098,0.4939639742508429,40111,225.03739611961467,0.7564473183720045,0.991598314676772,0.9654223686192813,0.9318038470912376,0.006071988291562017,0.002823635834471288,0.8682584094540307,0.998592310990128,SEKER
39779,719.021,252.47965089721893,200.89149786100128,1.256796099314825,0.6057250694830307,40075,225.05154043023128,0.7752981991112498,0.992613849033063,0.9668978082721471,0.8913650649883335,0.006347058772146583,0.002471580261198377,0.794531679081656,0.9985643150518837,SEKER
39790,734.078,248.16165983709323,204.38924510824052,1.2141620255296295,0.5671517627567696,40254,225.0826547848859,0.7812377287363543,0.9884731952104139,0.9278961780027789,0.907000118119142,0.006236784615156904,0.002603573744754484,0.8226492142681376,0.9988294362961604,SEKER
39803,727.1389999999999,252.31730289971085,201.68243041165934,1.2510623874608182,0.6009047340666548,40242,225.1194207506178,0.7911548399920493,0.9890909994533075,0.945999252946708,0.8922076217662193,0.006339152900527871,0.002477848250030131,0.7960344403377329,0.9958887474299603,SEKER
39807,719.3249999999999,241.46018444329144,210.05138292027314,1.1495291346638732,0.49319037804333266,40140,225.13073214750716,0.7870729199620373,0.9917040358744394,0.9667607368859724,0.9323720706441382,0.006065771960793113,0.0028276318490204904,0.8693176781172379,0.9993059982741158,SEKER
39826,732.9759999999999,247.0394731059577,205.71307829005525,1.2008933761500193,0.5537042551628498,40266,225.18445352337847,0.7917536430687263,0.989072666766006,0.931530424999172,0.9115322773814151,0.006202969746044235,0.00264160350567288,0.8308910927081489,0.9978116095352677,SEKER
39833,720.171,247.16591226922316,205.34781776591723,1.2036451858036095,0.5565567127721917,40184,225.20424237885868,0.7628504672897196,0.9912651801712125,0.9651206812193895,0.9111460407758699,0.006205053906791433,0.0026380151842782637,0.8301871076215434,0.9992507154048935,SEKER
39834,723.3960000000001,258.4963083579339,196.30301680534546,1.3168229024939513,0.6506198837335276,40145,225.20706921626697,0.7749805447470817,0.9922530825756632,0.9565585921077893,0.8712196729108715,0.006489338463572173,0.002306167690540362,0.7590237184669262,0.9994998160133693,SEKER
39835,731.546,249.6095936119513,203.44624167626876,1.2269068799468874,0.5793796789555296,40279,225.20989601819278,0.7937788936712896,0.9889768862186251,0.9353871631637567,0.9022485584761183,0.006266087451034299,0.002561421212785358,0.8140524612722335,0.9987665653726004,SEKER
39859,724.609,255.68460998223364,198.7528499993822,1.2864449993196496,0.6290856501131754,40202,225.27772862313498,0.7854764016159228,0.9914680861648674,0.9539570347999365,0.8810766069916703,0.0064147271628047274,0.0023845840498169734,0.7762959873879542,0.9986620909671436,SEKER
39868,732.632,255.11644208010037,199.12013283251048,1.2812187218390974,0.6251472173724815,40297,225.30316058480287,0.7538764087436653,0.9893540462069137,0.9333887149394151,0.8831385337134137,0.0063990278438873375,0.002401093660537316,0.7799336697294783,0.9992656194500789,SEKER
39872,721.45,249.1060397290368,204.06493577784056,1.2207194674553552,0.5735236074991641,40228,225.3144627574546,0.7798314068336951,0.9911504424778761,0.962643336980128,0.9044921712959617,0.006247643452273194,0.002579379526999321,0.8181060879356834,0.9986780279868317,SEKER
39883,729.422,245.9412377343797,206.7585614656914,1.1895093290982783,0.5415279097262766,40302,225.34554080938122,0.7575118708452042,0.9896034936231453,0.9419762797076432,0.9162576511579479,0.006166568155213492,0.0026809811189973222,0.8395280833054797,0.9986264871318646,SEKER
39890,721.856,247.16399175452617,205.87367843569524,1.2005614007218897,0.5533578130085686,40261,225.36531552012534,0.7576448243114909,0.9907851270460247,0.9619948765462035,0.9118048058713567,0.0061961391765988005,0.0026418516984816716,0.8313880040101024,0.9981323466377445,SEKER
39898,714.231,239.75978971297744,212.04988224542532,1.1306763633826535,0.4666797435947356,40185,225.3879130651054,0.7804773082942097,0.9928580316038322,0.9828417529422042,0.9400571852975139,0.006009318505012217,0.002894823429087947,0.8837075116294847,0.9991871955431598,SEKER
39898,743.9609999999999,257.4361065313364,197.91907113702075,1.3007139991734884,0.639479057569353,40460,225.3879130651054,0.7615284776301725,0.9861097380128522,0.9058590989730069,0.8755101065734541,0.006452356171520788,0.002338528948679978,0.766517946712261,0.9970206239063558,SEKER
39901,730.8290000000001,258.1497116155328,197.14903280385627,1.309414040455203,0.6455708558371213,40316,225.39638656038326,0.7693242070760629,0.9897063200714357,0.9387762624442131,0.8731227517157576,0.006469755435090168,0.0023193636553943695,0.7623433395636965,0.9982230724722126,SEKER
39901,716.1329999999999,239.501900560176,212.50008146450972,1.1270673352667677,0.4612726629295139,40196,225.39638656038326,0.7962364303959132,0.9926609612896805,0.9777014752130491,0.9411047930442261,0.006002403462574271,0.002904403074660409,0.8856782314908157,0.9982190042701371,SEKER
39926,723.237,248.27504610520577,205.00503832324668,1.2110680212343468,0.5640839391497244,40308,225.46698663683804,0.7810250391236306,0.9905229731070755,0.9591894521416722,0.9081339029992451,0.006218380155918594,0.002608894930081625,0.8247071857766424,0.998776499576265,SEKER
39928,737.776,252.96989836902526,201.198247950122,1.2573166066124875,0.6061575156671968,40395,225.4726336879613,0.74826183917093,0.98843916326278,0.9218035450918598,0.8913022266350767,0.006335651632163526,0.0024664426294545762,0.7944196592046459,0.9988370301374341,SEKER
39930,721.5589999999999,251.54361469257384,202.24418444027967,1.2437619177467707,0.5946125347527471,40234,225.47828059765544,0.7693196925033235,0.9924442014216831,0.9637524124874554,0.8963784704820499,0.006299614693027144,0.0025087617400117103,0.8034943623437393,0.9993556890073679,SEKER
39935,737.0559999999999,253.32723872893882,200.97742815761924,1.2604760696323745,0.6087644275578747,40360,225.49239725320837,0.7822109922826811,0.9894697720515362,0.9237672918376454,0.8901229823709804,0.006343489138072839,0.0024564505209020223,0.7923189237450087,0.9986990428974616,SEKER
39940,730.9209999999999,252.6156700354854,201.60120044421643,1.253046457455916,0.6025846040248448,40331,225.50651302506185,0.7559812235009086,0.9903052242691726,0.9394572993042297,0.8926861623167894,0.006324879069491372,0.0024775772244289324,0.7968885843918775,0.9985384176593017,SEKER
39948,731.068,244.9691349991189,207.9641485254794,1.1779392589348434,0.5284889048106709,40386,225.52909642234695,0.7720315398886828,0.9891546575545981,0.9392676312987165,0.9206429063937306,0.006132200235283841,0.0027174460779769167,0.8475833610930955,0.9984017162515046,SEKER
39951,725.1809999999999,247.91933539228216,205.56349103824223,1.2060475045452512,0.5590191625440486,40307,225.53756461333552,0.76188569140111,0.9911677872329868,0.9546511162016477,0.9097215602666406,0.006205585226709774,0.0026217812755563283,0.8275933172139711,0.9981168550042363,SEKER
39951,739.057,250.38350480081985,203.47977489753887,1.2305080685630752,0.5827207719178477,40414,225.53756461333552,0.7553601815087918,0.9885435740090068,0.919139962687172,0.9007684623344127,0.006267265019669592,0.0025451331735867836,0.8113838227363019,0.9984143405785715,SEKER
39951,718.307,247.29653458982676,205.9721726021817,1.2006308010716558,0.5534302793593323,40267,225.53756461333552,0.8086428499139763,0.9921523828445129,0.9730100388873778,0.9120126369235974,0.006189996109980395,0.0026416395783954217,0.8317670499083333,0.9986451394364502,SEKER
39965,739.1809999999999,248.24547390745238,205.41973835604654,1.2084791651188727,0.5614858492500522,40461,225.57707863464492,0.7836274509803921,0.9877412817280838,0.9191535966545941,0.9086855646711272,0.006211571973162827,0.002612376691490359,0.8257094554416852,0.9978526733429267,SEKER
39984,729.801,254.431815127163,200.58116211135737,1.2684731330148997,0.6152278154850537,40353,225.6306937379991,0.8208918452820891,0.990855698461081,0.9433811507698344,0.8868022013097328,0.006363340714464861,0.0024275712762020147,0.7864181442477878,0.9975502872937547,SEKER
39989,718.723,247.16122382169394,206.1444571223256,1.1989709899162075,0.5516910711538143,40283,225.64480085837215,0.7560643587755951,0.9927016359258248,0.9728084221876852,0.9129457985737921,0.006180730296373851,0.0026484972908668663,0.8334700311335391,0.9993063882936717,SEKER
39998,720.425,251.30194619809328,202.8546515666173,1.2388276248896661,0.5902577895613152,40296,225.6701914527416,0.7886818495514147,0.992604725034743,0.9684352518044301,0.8980041534372082,0.0062828627980922366,0.002520291183124238,0.8064114595904769,0.9990047931682795,SEKER
40000,738.009,264.58904851010703,192.7659958846062,1.3725919205610082,0.6849940545273504,40470,225.6758334191025,0.7275637527738368,0.9883864591055103,0.9228827728293327,0.8529296079708375,0.006614726212752676,0.002159456190103673,0.7274889161532868,0.998545408609686,SEKER
40000,727.8770000000001,246.69916253897648,206.88846214128074,1.1924259090413156,0.5447068445777322,40425,225.6758334191025,0.7558578987150416,0.9894867037724181,0.9487545298950711,0.9147815140371526,0.006167479063474412,0.002664139524718176,0.8368252184241054,0.9978520717880612,SEKER
40009,742.191,265.1094338644585,192.62968906351767,1.3762646617627117,0.687056040216955,40475,225.7012205224179,0.7776287657920311,0.9884867201976528,0.9127171126767779,0.851351146703483,0.006626244941499625,0.002147247717346518,0.7247987749933356,0.9975149409122307,SEKER
40021,719.2689999999999,252.30996446311775,202.1951505923875,1.2478536884979923,0.598160934347345,40316,225.73506555217764,0.7823324732191728,0.9926828058339121,0.9721093365586158,0.8946736052716429,0.006304439280955442,0.0024916367558698634,0.8004408599697596,0.9988330795377695,SEKER
40024,724.462,240.42984498469698,212.08528288261405,1.1336470014176854,0.4710457077676692,40386,225.74352601676122,0.7666551737348197,0.991036497796266,0.9582948030864556,0.9389164062852907,0.006007141839513716,0.0028797538038258666,0.8815640179916852,0.9993824055540004,SEKER
40025,725.2139999999999,248.43026568910622,206.03616027253588,1.205760510002192,0.5587263278658355,40354,225.74634610116038,0.7710163353367236,0.9918471526986172,0.9563323474266319,0.9086909981558638,0.006206877343887726,0.0026104647256508513,0.8257193301295,0.9956197606156143,SEKER
40044,723.751,262.68947349273805,194.29030072415455,1.3520462550814303,0.6730250732538018,40340,225.79992101277372,0.7818039828192113,0.9926623698562221,0.9606583525570636,0.85956973460155,0.006560020814422586,0.0022090698204541505,0.7388601286429791,0.9989730699607235,SEKER
40055,723.4780000000001,244.89881068324246,208.46790949752193,1.174755439691084,0.5247749546404776,40387,225.83093225766692,0.7912723968313545,0.9917795330180503,0.9616475764153593,0.9221397671455482,0.006114063429864997,0.002727072650805076,0.8503417501512461,0.9989435965866129,SEKER
40064,726.711,253.53133100865014,201.60196697909532,1.2575836178966424,0.6063790252369902,40403,225.8563019272864,0.7664524028160392,0.9916095339454991,0.9533243876849354,0.8908417789183638,0.006328158222060956,0.002458438779741293,0.793599075066435,0.9980171959814762,SEKER
40064,721.433,241.51278549403645,211.38669803348225,1.1425164768682958,0.4836510690961964,40450,225.8563019272864,0.7944635031430328,0.9904573547589617,0.9673244455318935,0.9351732723602054,0.006028174558058018,0.0028440283844398877,0.8745490493368949,0.9991866986969065,SEKER
40067,724.4279999999999,245.5094589178593,208.05808139166805,1.1800044356637571,0.5308681282312957,40443,225.8647578505858,0.7645644499570652,0.9907029646663205,0.9594144034372372,0.919983934004571,0.006127472955745609,0.0027075852439178306,0.846370438826527,0.9987208720299824,SEKER
40091,727.0829999999999,261.31328624820935,195.56011601629407,1.3362299612587503,0.6632767811734317,40500,225.93239384377222,0.7868231507467667,0.9899012345679012,0.9529909406719728,0.8646035457575989,0.0065180036977927555,0.002246789648213797,0.7475392913366126,0.9988843983021154,SEKER
40098,718.837,248.47752727068826,205.79086777994198,1.207427374942567,0.5604220696551502,40356,225.95211719475114,0.7960848934860728,0.9936068986024383,0.975150683426964,0.9093462884818625,0.006196756129250543,0.0026137338475287837,0.8269106723757387,0.9984345824586313,SEKER
40111,740.571,250.5138387209686,204.0125497649851,1.2279334727670002,0.5803370860929684,40644,225.98874170823666,0.7603116233224657,0.986886133254601,0.9190517162885664,0.9021008294873127,0.006245514664829314,0.002551339916690945,0.8137859065616977,0.9992749543331472,SEKER
40113,726.0740000000001,251.5681979454164,203.29819146686236,1.2374345100183641,0.589012977457502,40420,225.994375721967,0.7835794655414908,0.9924047501237011,0.9561658681245719,0.8983423881384315,0.006271487995049395,0.002519520678638917,0.8070190463262601,0.9986332181662232,SEKER
40115,735.3959999999998,252.9439950981031,202.91715259368652,1.2465382638430198,0.5970262993733929,40613,226.00000959524547,0.7636588616028935,0.9877379164306995,0.9321249524653297,0.8934784536299921,0.006305471646468979,0.0024787554120954164,0.7983037471010421,0.99511616693071,SEKER
40116,724.6930000000001,254.82244660596123,200.6987206790945,1.2696764869438675,0.6161840371302508,40460,226.00282647921858,0.7788002329644729,0.9914977755808205,0.9598853289923444,0.8869031338855827,0.006352139959267156,0.002424401696212863,0.7865971688960679,0.9987239300439514,SEKER
40119,734.219,264.79468214919814,193.12246464979555,1.3711231504287789,0.6841630493041279,40472,226.01127692048905,0.7534084507042254,0.9912779205376556,0.9352091031541562,0.853534047912425,0.0066002313654178356,0.0021608385662973493,0.72852037094577,0.9988911461627068,SEKER
40123,724.676,257.40208911500906,198.7044522013415,1.29540171980742,0.6356695258635084,40429,226.0225436840514,0.7949871210620171,0.9924311756412476,0.9600978670166443,0.8780913335286217,0.006415325103182939,0.002352649311822502,0.7710443900180731,0.998812228877275,SEKER
40126,730.299,265.73840780827953,192.42685905596898,1.380983970283417,0.6896725645105994,40483,226.0309933881704,0.784584400602233,0.9911814835857027,0.9454407581907419,0.8505770590423776,0.0066225990083307465,0.00213827167539305,0.7234813333691804,0.9991161241821112,SEKER
40126,721.437,250.2511911988398,204.36943360726676,1.2245040111024783,0.5771230722223989,40413,226.0309933881704,0.7609565530712484,0.9928983247964763,0.9688106600792965,0.9032164534576582,0.006236634381668738,0.0025603386286608505,0.8157999617966301,0.9989503254772224,SEKER
40142,735.881,265.01612370867235,193.26070672227755,1.371288184770585,0.6842566065054057,40542,226.07605314309365,0.7818550114915663,0.9901336885205466,0.9315232327208152,0.8530652776116187,0.006601966113015604,0.0021566621396124142,0.727720367866588,0.9979143422723558,SEKER
40143,721.4459999999999,251.92673455516646,203.18907449455835,1.2398635860803302,0.5911790572263478,40480,226.07886907958388,0.7478204172876304,0.9916749011857707,0.9691969298757486,0.8973992755424595,0.006275732619763507,0.0025106550844517157,0.8053254597441314,0.9984937124801491,SEKER
40146,732.715,254.08294400960378,201.53715226928514,1.2607250878989757,0.6089685903617733,40549,226.0873166786183,0.7672578549040593,0.9900614071863671,0.9396843186131938,0.8898169751609644,0.006328972849340003,0.002447460783475572,0.7917742492846084,0.9982096600254834,SEKER
40150,722.163,251.26718369294682,203.66525074547553,1.2337263365902333,0.5856659462910387,40443,226.09857965302828,0.765855984740105,0.9927552357639147,0.9674420195124674,0.8998333022641148,0.006258211299948862,0.0025309189264512877,0.809699971863542,0.9989481800244226,SEKER
40154,729.6379999999999,241.28459847044962,211.9747376280786,1.1382705371891852,0.47769495672575374,40559,226.10984206640745,0.7666342096721843,0.9900145467097315,0.9478154642007656,0.9371084748042854,0.00600898038727025,0.0028585119434598972,0.878172293550014,0.9995976483238334,SEKER
40161,724.9499999999999,246.4546274170118,207.7667023459445,1.1862084955588768,0.5378788954483045,40535,226.1295499400927,0.7773197073510626,0.9907734056987788,0.9602808622213321,0.9175301446357985,0.006136665606359697,0.0026828326777578945,0.8418615663153894,0.9986233420478177,SEKER
40166,731.962,252.62705819337276,202.94005335412234,1.24483587156917,0.5955493104087702,40541,226.14362594119814,0.7538663663663664,0.9907501048321452,0.9420877955526776,0.8951678714007628,0.006289574719747368,0.0024912596244131458,0.8013255179881728,0.9975187495954236,SEKER
40168,737.0699999999999,256.0777990394042,199.9792022524529,1.2805221550795702,0.6246167615815695,40630,226.1492560963268,0.7961784701988067,0.9886290918040856,0.9291216978658525,0.8831271470805162,0.006375169265071804,0.0023920178878821,0.7799135579105718,0.9986965899514206,SEKER
40172,721.9449999999999,244.90371224769498,209.37680522900772,1.1696792869670039,0.5187348038207978,40501,226.16051598610434,0.8197363588132065,0.9918767437841041,0.9685567947045908,0.9234670798185622,0.006096378379161978,0.0027348741694732223,0.8527914475086229,0.9974924922534449,SEKER
40196,729.067,251.1953254217923,204.32064995490313,1.2294172198318436,0.5817138313686986,40594,226.2280635557282,0.7729702703742164,0.9901955954081884,0.9502936329057959,0.9006061843541852,0.0062492617529553264,0.0025359937444117938,0.8110914992970045,0.9971698560949651,SEKER
40197,742.209,256.7947878935759,199.5419875228182,1.286921069001634,0.6294408096458354,40643,226.23087760011748,0.7623030096148375,0.9890264006101912,0.9169614403395664,0.8809792420470578,0.006388406793879541,0.002373750273120698,0.7761244249178084,0.9988108745935045,SEKER
40202,726.182,251.79476930952174,203.4919059102368,1.237369949351165,0.5889551236703637,40556,226.24494729704574,0.7567577742639862,0.991271328533386,0.9580023263795354,0.8985291788128109,0.006263239871387536,0.002518300474183706,0.8073546851780246,0.998996425907158,SEKER
40242,734.477,247.41127367027187,207.43936025665184,1.1926920395635874,0.5449948346241399,40680,226.35747338939888,0.7726958525345622,0.9892330383480826,0.9374174200358928,0.9149036340642599,0.006148085921929125,0.002657180775113442,0.8370486596239892,0.9983412730609028,SEKER
40243,727.2379999999999,252.26306474121714,203.25973863285253,1.2410872238543964,0.5922624148009321,40600,226.3602858250032,0.7954419671094244,0.9912068965517241,0.9561963578324919,0.8973183849059069,0.0062684955083174,0.002506855757183033,0.8051802838901455,0.9992989632355155,SEKER
40248,726.411,258.6539099528777,198.8173809586009,1.300962263489108,0.6396554006116768,40574,226.37434747890677,0.8084525148642134,0.9919652979740721,0.9584938799475962,0.8752017223329362,0.006426503427571003,0.002325879231952353,0.7659780547745382,0.9965085439224671,SEKER
40248,725.1399999999999,256.4383641057623,200.01440125667045,1.2820995013088343,0.6258160772211288,40570,226.37434747890677,0.7578947368421053,0.9920631008134089,0.9618568536371853,0.8827631866562046,0.006371456074979186,0.0023866861402642827,0.7792708437154172,0.9991027601120509,SEKER
40265,729.52,257.45105388743985,199.6496894417481,1.289513921145149,0.6313647558801051,40629,226.42215057003878,0.7984334721395995,0.9910408821285289,0.9507430558632408,0.8794764952449283,0.006393916649383828,0.0023596287635313435,0.7734789056883025,0.997411816597182,SEKER
40272,723.7259999999999,249.72291251445014,205.5231240971077,1.2150599287137074,0.5680346004255373,40551,226.44183126263238,0.7684762904303024,0.9931197750980247,0.9661948364235866,0.9067723461279484,0.006200906647657185,0.0025859970423145993,0.822236087702384,0.9990661221094964,SEKER
40273,722.9229999999999,252.37370351356108,203.38746803876478,1.2408517886926038,0.5920543732357328,40573,226.44464265051448,0.7785833043343773,0.9926059201932319,0.9683665108970391,0.8972592607626677,0.006266573225574481,0.002505426573261298,0.8050741810243689,0.9989777375543215,SEKER
40285,737.587,261.99894881729097,195.95360410852953,1.3370458278082091,0.6637916713076567,40752,226.4783765829666,0.7455628967482835,0.9885404397330192,0.9305221697652892,0.8644247528676339,0.0065036353187859245,0.0022399829951282313,0.74723015337027,0.9990809589762075,SEKER
40286,764.3639999999999,256.264164764074,200.7891122080458,1.2762851628057812,0.6213615775551807,41170,226.48118751719923,0.7588818144143465,0.97852805440855,0.8664900169747459,0.8837801716276091,0.0063611220961146304,0.0023938145840421052,0.7810673917621264,0.9968647232574125,SEKER
40289,734.2529999999999,247.60132045387726,207.37165693103952,1.193997888227396,0.5464029622467816,40728,226.48962011058026,0.7725302960576775,0.9892211746218817,0.9390849766042063,0.9147351059978307,0.006145630828610223,0.0026541631715263666,0.8367403141448627,0.999066168083694,SEKER
40310,729.425,255.4046088807292,201.2386559800611,1.2691627641661198,0.6157763317043666,40674,226.54863947566406,0.7516595808159916,0.9910507941190932,0.9520535440840192,0.8870186034170569,0.006336011135716428,0.002419505468874961,0.7868020028079461,0.9985798047351718,SEKER
40326,730.6629999999999,254.91260391625863,201.71514535833717,1.2637256536360657,0.611413865302894,40661,226.5935962929892,0.7929915639195327,0.99176114704508,0.9492066637014345,0.8889069932667099,0.00632129653117737,0.002434508066779091,0.7901556426784627,0.9985399560180658,SEKER
40329,724.982,251.3028695993292,205.05857395488536,1.2255174936241289,0.5780775576198669,40651,226.60202470327658,0.7908267315083536,0.9920789156478316,0.9642127489119293,0.9017088625552306,0.006231319140056267,0.0025411196235876764,0.813078872810648,0.9964423823256372,SEKER
40334,737.7579999999999,249.85377237791604,206.00594659086644,1.2128473789843193,0.5658531398019134,40836,226.61607135714814,0.8103101896496303,0.9877069252620237,0.931222161503257,0.9069947961977547,0.006194619238803888,0.0025859109257068058,0.8226395603298065,0.9977362345948184,SEKER
40338,730.78,262.06970103844077,196.2671315072155,1.335270450155869,0.6626695159258019,40674,226.6273080533919,0.7793427230046949,0.9917391945714708,0.9491851160586005,0.8647596694901785,0.006496844192534106,0.002241113861886523,0.7478092859767627,0.9985276419169308,SEKER
40339,732.1759999999999,254.6785590677097,202.39671072617654,1.2583137253266212,0.6069835825336319,40755,226.63011714040067,0.8035657370517928,0.989792663476874,0.9455924889122151,0.8898672819966287,0.006313457425015734,0.002442013023830459,0.7918637795680674,0.9964130624195132,SEKER
40348,744.73,255.92546897445786,201.3583308919144,1.2709951847576355,0.6172271036367885,40885,226.655397356812,0.7621170337350308,0.9868655986303045,0.9141851837367349,0.8856304855670026,0.006342953032974568,0.0024070299204920504,0.7843413569656452,0.9968940879096048,SEKER
40363,736.091,268.6974504608167,191.71052607346417,1.401579015843141,0.7006745752501569,40681,226.6975247861021,0.7403881429305158,0.9921830830117254,0.9361173325379245,0.8436906431278576,0.006657023770800404,0.002080620154021501,0.7118139013014979,0.9976634272496201,SEKER
40367,732.896,262.79376266502095,195.96371965407167,1.341032733655608,0.6662886227084032,40675,226.708757445151,0.7688952380952381,0.9924277811923786,0.9443905569203517,0.8626869798813798,0.0065101137727604464,0.0022242383022204695,0.7442288252568561,0.9980352159995036,SEKER
40381,724.736,254.37550145314535,202.37718665395548,1.256937630465739,0.6058427396798953,40687,226.74806736982478,0.7472980975645865,0.9924791702509401,0.9661115280613947,0.8913911366248082,0.006299385885766706,0.002453303178804236,0.7945781584532676,0.9987351877060807,SEKER
40388,729.945,261.22799581368815,197.1404287843859,1.3250858660726326,0.6561067720279905,40719,226.76771977678777,0.7845376845376846,0.991871116677718,0.9525371781323273,0.8680835263097988,0.006467960676777462,0.002265651939577798,0.7535690086504553,0.9985436424730837,SEKER
40392,736.057,267.27635258565516,192.6563400803605,1.3873218627228632,0.6931293086668109,40754,226.7789489589867,0.7688442211055276,0.9911174363252687,0.9368764604662857,0.8484811572932173,0.006617061610855,0.002115503506926156,0.7199202742816374,0.9987611359283558,SEKER
40393,730.7139999999999,250.96494378039398,205.32808351508285,1.2222631190241386,0.5749985297368131,40765,226.78175616765876,0.7668343616516374,0.990874524714829,0.9506510169667807,0.9036391806423106,0.006213080082697348,0.0025554472853676867,0.8165637687919064,0.998055778925701,SEKER
40398,724.683,252.23414179539537,204.02312204652085,1.2363017449457594,0.5879957451365554,40714,226.79579168981752,0.7921176470588235,0.9922385420248563,0.9666596300388484,0.899147871400325,0.006243728446838838,0.002517376948660246,0.8084668946437354,0.9995090325789298,SEKER
40409,734.88,246.3011391128978,209.09049005686748,1.177964330400249,0.5285179282827064,40864,226.8266667814946,0.7727863836297572,0.9888655050900548,0.9402754800506342,0.9209322685167256,0.006095205006629657,0.0027044492857495675,0.8481162431953625,0.9990506825172001,SEKER
40415,730.648,258.67165583804604,199.16113759934825,1.2988058762669596,0.6381186995279982,40770,226.84350596936116,0.770837306885371,0.9912926171204317,0.9513406353149353,0.876955402146525,0.006400387376915651,0.002335049296902329,0.7690507773539734,0.998847668775014,SEKER
40422,739.7009999999999,249.04286445615642,206.84299764322702,1.2040188321275338,0.5569413962967441,40891,226.863150108793,0.7687713959680487,0.9885304834804725,0.9283574995219618,0.9109401733079242,0.0061610722986531205,0.0026169503859302993,0.8298119993462709,0.999109274338311,SEKER
40422,726.959,259.1305336726017,198.97894286436212,1.3023012884797718,0.6406039425281029,40712,226.863150108793,0.7825076949880946,0.9928767930831205,0.9611868630700046,0.8754782653109614,0.006410631182836121,0.0023230685716157076,0.7664621930318901,0.9981647015564621,SEKER
40429,723.823,243.9451796951706,211.2326665199241,1.1548648403402177,0.5002133434470578,40816,226.88279254738092,0.7908646322378716,0.9905184241473932,0.9697015846308885,0.9300564693710672,0.006033915746003379,0.002784942779459134,0.865005036218975,0.9989639030465108,SEKER
40445,730.904,258.3133108858574,199.9540393168337,1.2918634290580724,0.6330931339939523,40795,226.92768316539446,0.7679819231353486,0.9914205172202476,0.9513800199086249,0.8784978303563632,0.006386779846355727,0.00234652119810061,0.7717584379408376,0.9970065020427519,SEKER
40446,742.366,264.1369026232824,195.4214614490208,1.351626892280648,0.6727728021506834,41006,226.93048853417292,0.7328767123287672,0.9863434619324002,0.9222513405256648,0.859139659322143,0.0065306063052782085,0.002194766562537076,0.738120954220168,0.997664131479832,SEKER
40453,728.4469999999999,258.311205793017,199.55618651789513,1.2944284529603047,0.6349639919907583,40801,226.95012514464833,0.7807048016056817,0.9914707972843803,0.957998171982074,0.8785918692451226,0.006385464756458532,0.00234704271912326,0.7719236727036385,0.9991999654612073,SEKER
40459,733.681,247.97811560955267,208.01007949656878,1.1921447086108306,0.5444021715155188,40874,226.966955172862,0.782648225166844,0.9898468464060283,0.9445184889327098,0.9152701020207232,0.006129121224191222,0.002653231092173954,0.8377193596530254,0.9986827019112074,SEKER
40459,726.1329999999999,250.05170735917474,206.26427717467675,1.2122879966627291,0.5652983863415918,40829,226.966955172862,0.7585683215839208,0.9909378138088124,0.9642566882859517,0.9076800857306134,0.0061803729048956904,0.0025877699868489426,0.8238831380319338,0.9987836388889357,SEKER
40462,733.598,248.22165805233675,207.7497854960301,1.1948106586953853,0.5472752392231803,40843,226.9753697189943,0.7920059505167554,0.9906715961119409,0.9448022796079338,0.9144059849569504,0.006134685829972239,0.0026456252629257575,0.8361383053250904,0.9990269593459147,SEKER
40462,741.338,249.64285458386806,206.62167393922715,1.2082123323485152,0.561216428579726,40933,226.9753697189943,0.7929061336468743,0.988493391639997,0.9251766975940932,0.9092003458193971,0.006169810058421928,0.0026006980132032057,0.8266452688381113,0.9987630082877598,SEKER
40464,763.3629999999999,239.66002812513662,216.0699803126193,1.1091778125697342,0.43263596339045657,41122,226.98097924311548,0.74855705194613,0.9839988327415982,0.8726025223971324,0.9470956880827833,0.0059227962664377375,0.002939557732951468,0.8969902423850009,0.9949216749449912,SEKER
40480,732.301,261.3224502908538,197.56275635322456,1.3227313442804605,0.6545584274645645,40810,227.02585044632997,0.7847394540942928,0.9919137466307277,0.9485737746232086,0.8687575452994893,0.006455594127738483,0.002268351425514924,0.7547396725147945,0.9983178216072884,SEKER
40484,733.5009999999999,254.44678381547442,202.74844515768203,1.2549875961691614,0.6042159320333073,40856,227.0370668614672,0.7586814340061093,0.9908948502056002,0.9455660259504346,0.8922772119851794,0.0062851196476502915,0.0024574942977182153,0.796158623028045,0.9991691964833155,SEKER
40485,733.929,255.68231186386066,202.1582879266335,1.2647629463336763,0.6122528910497638,40835,227.03987087866983,0.7921770437913357,0.9914289212685197,0.944486839191486,0.8879764471136289,0.006315482570430052,0.002422100113739203,0.7885021706285433,0.9972683285146554,SEKER
40486,727.273,244.5372380047458,211.06406449429932,1.1585924803952146,0.5050052816079523,40839,227.04267486124232,0.7896163672888264,0.9913563015744754,0.9618775874017742,0.9284584904685806,0.006040044410530697,0.002768661508023527,0.8620351685231955,0.9987474640871961,SEKER
40504,740.4789999999999,245.54173559034223,210.4261871575346,1.1668782241751998,0.5153372695918247,40946,227.0931406272612,0.7631896291829967,0.9892052947784887,0.9282870363971064,0.924865746677541,0.006062160171596441,0.00273603690150222,0.8553766493774054,0.9981203856264395,SEKER
40504,727.151,258.43411306301545,199.88478772006155,1.2929153639493174,0.6338624016413094,40814,227.0931406272612,0.7562077592322916,0.9924045670603224,0.9626281709228448,0.8787274169640592,0.006380459042638145,0.002346650409137685,0.7721618733243276,0.9983399494769097,SEKER
40512,737.636,248.202030035321,208.52515154042675,1.1902738264511086,0.5423652412227417,40973,227.11556625716105,0.7442680776014109,0.9887486881604959,0.9356412054420912,0.915043145395873,0.006126629888312624,0.002649523014274877,0.8373039579359727,0.9966209859151082,SEKER
40516,733.0459999999998,255.95520025882797,201.8966981963243,1.2677532745480424,0.6146537785893944,40896,227.1267782417781,0.7723364913551536,0.99070813771518,0.9474885489349397,0.8873692662313644,0.0063173857305466475,0.0024162100687033054,0.7874242146519902,0.9982596265834811,SEKER
40527,730.217,254.29478676981665,203.13438860285672,1.2518549346510819,0.6015772879682068,40849,227.15760834601585,0.772531452535265,0.9921173100932703,0.9551035110131465,0.8932845664336606,0.0062747004902859,0.0024645185177033483,0.7979573166285733,0.9989268044624151,SEKER
40527,754.329,234.83609109739115,220.44692390669044,1.065272705718458,0.34466224369211523,41159,227.15760834601585,0.7694513005505981,0.9846449136276392,0.8950199413503555,0.9673027995164897,0.005794558963095989,0.003129319655076887,0.9356747059524383,0.9967487256822766,SEKER
40533,755.94,252.9526239594365,204.3172471798031,1.2380385280780204,0.5895535341641714,41130,227.17442300300962,0.7672054815263477,0.9854850474106491,0.8913411567648124,0.8980907944225924,0.006240658820206658,0.002504327843953619,0.8065670750266033,0.9985611143621302,SEKER
40547,725.149,259.02436398597246,199.5921150375465,1.2977685212526846,0.6373753950180646,40819,227.2136523635335,0.7619897767420882,0.9933364364634116,0.9689783781394253,0.8771902722472791,0.006388249783855093,0.002333118939032507,0.7694627737252555,0.9985845660164141,SEKER
40566,737.031,268.88771307486223,192.41783011644466,1.397415784764544,0.6985035086203548,40945,227.26688137897833,0.7883628731343284,0.9907436805470754,0.9384270990288526,0.8452111060787071,0.006628400953381212,0.002086648579577578,0.7143818138387914,0.9982884230070532,SEKER
40570,737.047,248.71934823551635,208.31522972949318,1.1939566231354748,0.5463585912439644,40979,227.2780858989831,0.7506846273406854,0.990019278166866,0.9384788855976968,0.913793347849118,0.00613062233757743,0.0026367945645923473,0.8350182825732994,0.9969756089176001,SEKER
40572,743.7459999999999,241.137839804808,214.70572288191764,1.123108581215729,0.4552065687655272,41068,227.28368795185241,0.7589225589225589,0.9879224700496737,0.9216944975222313,0.9425467530762903,0.005943454594419994,0.002893545518827772,0.8883943817346572,0.9977633536300357,SEKER
40572,725.331,250.7140143164673,206.47193488631467,1.2142764800190047,0.5672644822553737,40900,227.28368795185241,0.767478813559322,0.9919804400977995,0.9690893088753234,0.9065456056435695,0.006179483740423625,0.0025744862983853346,0.8218249351116663,0.997922689399241,SEKER
40580,925.7309999999999,259.09151352725735,200.5185354813928,1.2921075495851098,0.63327190722165,41753,227.30609478268042,0.7512588862559242,0.9719062103321917,0.595048400707483,0.8773197226267583,0.006384709549710629,0.0023332027446453817,0.7696898957098923,0.9945221250861277,SEKER
40587,746.02,262.9695840231793,196.74187074734897,1.3366223622061535,0.6635245914105574,41053,227.3256989479325,0.7775287356321839,0.9886488198182837,0.9164227761695725,0.8644562442168026,0.006479157957552401,0.0022318777021854666,0.7472845981654205,0.9988373048401404,SEKER
40591,727.9259999999999,252.66835148221926,204.96448045897287,1.2327421361809816,0.5847692826259216,40944,227.3369005690563,0.7954340583970214,0.9913784681516217,0.962642765287489,0.8997442664878209,0.0062247382789835,0.0025163857097710665,0.809539745077707,0.9979537546704996,SEKER
40596,735.327,255.36081965316666,202.7558310204563,1.2594499421691254,0.6079211321883888,41023,227.35090181934328,0.7803921568627451,0.9895912049338176,0.943478661331075,0.8903123906327263,0.006290295094422274,0.0024379256283325774,0.7926561529141601,0.9983107459477405,SEKER
40596,730.855,255.7932183683709,202.35951534799025,1.2640533257281856,0.6116792541295007,40920,227.35090181934328,0.7683979406420351,0.9920821114369501,0.9550600147707624,0.8888073861752367,0.006300946358468098,0.002425583139923776,0.7899785697196563,0.9985750383081268,SEKER
40609,725.346,250.93677731327952,206.381121995734,1.2158901690556103,0.5688479555026696,40899,227.3873010353705,0.7784870792117169,0.9929093620870926,0.9699329613228471,0.906153747051159,0.0061793389966086215,0.002569977649850283,0.8211146132948561,0.9983851859731148,SEKER
40622,727.4299999999998,250.45141431187258,206.72847474482728,1.2114993574107977,0.5645140387431065,40942,227.42369442569475,0.7650094161958568,0.992184065263055,0.9646921623811632,0.9080551413556692,0.006165413182804209,0.002585775619341067,0.8245641397424646,0.998958925441983,SEKER
40636,783.891,250.07581033363533,207.9177861167204,1.2027629526280563,0.5556459365244325,41391,227.46288079565437,0.7565253006664929,0.981759319658863,0.8310161408047003,0.909575702232806,0.006154045928084342,0.0025983395113112193,0.8273279580923023,0.9950794176668385,SEKER
40641,727.677,253.51567307609122,204.56588462792953,1.239286176857852,0.5906660365122989,40960,227.4768742918316,0.7905578898225957,0.9922119140625,0.9644882765832392,0.897289195305711,0.006237929014445787,0.0024943072209187046,0.8051279000123702,0.9977838770879213,SEKER
40644,726.397,249.8944003767066,207.62175627140613,1.2036041157943056,0.5565143915045518,40996,227.48526997635682,0.7705023696682465,0.9914137964679481,0.9679618098964424,0.910325600067193,0.006148371232573236,0.002604515035779448,0.8286926981376951,0.997417942207218,SEKER
40646,741.995,253.38516108288232,204.82998550955904,1.2370511107176605,0.588669191275324,41085,227.49086692723606,0.7368611881583003,0.9893148350979676,0.9277387983775426,0.8978065880220341,0.0062339507228972675,0.002498470806698739,0.8060566694957663,0.9971332983011159,SEKER
40647,737.8149999999999,247.63317741336763,209.15885730646883,1.1839478404231503,0.5353476590941822,41105,227.4936653510382,0.7793948458352508,0.9888578031869603,0.9383036395153924,0.9186719959227795,0.006092286697994135,0.0026767142251901232,0.8439582360927433,0.9992025310293349,SEKER
40648,728.896,260.19742234915606,199.14321712552498,1.306584407467652,0.6436091897324878,40970,227.49646374041703,0.7545012436425734,0.9921405906761045,0.9614305369153162,0.8743225112935286,0.0064012355429333805,0.002307438912138946,0.7644398537546226,0.9988051933626423,SEKER
40649,727.5880000000001,253.48059001203367,204.30459326566583,1.240699418257436,0.5919196294318666,40977,227.4992620953739,0.7585750009330795,0.9919955096761598,0.9649141489083303,0.8975017064800648,0.006235838274300319,0.0024958342376646798,0.8055093131346285,0.9993949362070804,SEKER
40660,734.722,241.62048039017213,214.8962433451516,1.1243587911497266,0.4571379328502181,41027,227.53004172840937,0.7847148509118981,0.9910546713140127,0.9465229526560165,0.9416835913950286,0.005942461396708611,0.002882478946640134,0.8867679863026393,0.9970453811095128,SEKER
40662,727.207,248.59513220447906,208.50242687373282,1.1922889144835997,0.5445584629009926,41024,227.53563757798727,0.793559718969555,0.9911758970358814,0.9662344076093481,0.915285973463191,0.0061136966259524635,0.002646737525776264,0.8377484132184613,0.9988381462065976,SEKER
40676,734.559,258.7261551381089,200.44239301312572,1.2907756251002578,0.6322946688077702,41045,227.5748046723263,0.7534825133372851,0.991009867218906,0.9473156985008775,0.8795972117733754,0.006360658745651216,0.00234864422716554,0.7736912549594962,0.9986618132549465,SEKER
40688,732.9449999999999,258.7484843311317,200.43281032466268,1.2909487419350596,0.6324219418559965,41046,227.60837110305127,0.7985398308244853,0.9912780782536667,0.9517731167850799,0.8796510313535632,0.006359331604677833,0.0023487289416331755,0.7737859369613872,0.9989179818473443,SEKER
40692,735.0969999999999,262.0544327205265,198.2531801974218,1.3218170445466297,0.6539539553246011,41069,227.61955881330417,0.7643125469571751,0.9908203267671479,0.9463016539088723,0.8685964837544032,0.006439949688403777,0.002261176716778684,0.7544598515905135,0.9972578912584613,SEKER
40695,730.309,256.9121046341187,201.88614751588318,1.2725593498875716,0.6184578597132914,41014,227.62794923514434,0.759518477043673,0.9922221680401814,0.9588211634874224,0.8860148865282959,0.00631311228981739,0.0023998679847653534,0.7850223791497489,0.9989875684579994,SEKER
40705,738.3549999999999,249.13623866721815,208.62531959806546,1.194180261279889,0.5465989638240657,41147,227.65591507458092,0.7644131455399061,0.9892580261015383,0.9382686004636404,0.9137808144349108,0.006120531597278421,0.0026323100923230204,0.8349953768293288,0.9971349972695474,SEKER
40710,728.852,252.6876380339365,205.4403676092093,1.229980460873208,0.5822342998280585,41069,227.66989670610488,0.7915767368605262,0.9912586135528014,0.9630132591761599,0.9009934101941636,0.0062070164095783965,0.00252318511886571,0.8117891252133084,0.9984847623617235,SEKER
40718,737.0559999999999,249.66410365182045,207.98051104045717,1.200420666353949,0.5532107934689044,41105,227.69226553075174,0.7623665980153529,0.9905850869723878,0.9418794688630335,0.9119944044831112,0.006131541422757023,0.0026164842463848857,0.8317337938085047,0.9984304349927031,SEKER
40719,744.134,255.64399745462106,203.01187378459753,1.2592563808650326,0.6077616964609817,41173,227.69506147931952,0.7566477747839822,0.9889733563257475,0.9240695751907038,0.8906724341131353,0.0062782484209980855,0.00243719514372885,0.7932973848890175,0.9989647938450389,SEKER
40731,739.5219999999999,256.7799444471033,202.17687712157633,1.2700757282579458,0.6165003592326784,41145,227.7286101845965,0.759396673875755,0.9899380240612468,0.9359070960001112,0.8868629155401528,0.0063042877525006326,0.0024057016774851293,0.7865258309603805,0.9989473675506911,SEKER
40736,732.6909999999999,249.29400010703034,208.55991586931108,1.1953111846441493,0.5478108363501517,41104,227.74258735320362,0.7601418175032655,0.9910471000389256,0.9535567223111819,0.9135502148283794,0.006119746664057108,0.0026293167209040236,0.8345739950129784,0.9975756306521635,SEKER
40737,724.96,252.21382920832116,205.87161133708685,1.2251025169048453,0.5776872146507762,41013,227.7453826839884,0.7484016754850088,0.99327042645015,0.9740266001455703,0.9029853097225586,0.006191271551864918,0.0025391149092840954,0.8153824695747453,0.9989271157161089,SEKER
40750,727.315,258.1950890739605,201.07691828832844,1.2840612998839036,0.6272983651419121,41009,227.78171886250635,0.7818945833413282,0.9936843131995415,0.9680379608595107,0.882207789774258,0.006336075805495963,0.0023674656157142964,0.7782905843383813,0.999372819412945,SEKER
40752,728.679,241.61465186288765,215.1826909791693,1.1228349769372346,0.4547819389761269,41112,227.78730852935453,0.7818579486589157,0.9912434325744308,0.9644645834295387,0.9427710893072001,0.005928902921645261,0.0028892101149850585,0.8888173268334847,0.9979951826764902,SEKER
40756,732.781,248.0468990212661,209.8969437898057,1.181755648951537,0.5328676144562151,41203,227.79848745157702,0.775728506442833,0.9891512753925685,0.9537905545931298,0.9183686163802712,0.006086144347366427,0.0026704850280174007,0.8434009155522137,0.9966937962847268,SEKER
40778,725.165,254.14334835016007,204.39796335908125,1.2433751499944614,0.5942742124611624,41037,227.85996172037434,0.8027797464367273,0.9936886224626557,0.9744557352639602,0.8965804661014684,0.006232364224585808,0.0024842178562584525,0.8038565321947263,0.9994952362916453,SEKER
40778,727.9509999999999,241.44059882201424,215.26981748487248,1.1215719957535657,0.4528126001822411,41119,227.85996172037434,0.7713756053268765,0.9917069967654856,0.9670111721025675,0.9437516425659161,0.00592085435337717,0.002897310383218682,0.8906671628458649,0.9989473473852027,SEKER
40790,753.8019999999999,259.9481036502574,200.03590937936002,1.2995071957669175,0.638619724758737,41366,227.89348615032262,0.7935797665369649,0.9860755209592419,0.9020881929360737,0.8766883964536933,0.006372839020599593,0.0023221685804770474,0.7685825444765483,0.9987785470881214,SEKER
40795,757.35,268.804336881451,193.36641919644316,1.3901293616466548,0.6946400282483277,41287,227.9074532073731,0.7403273809523809,0.9880834160873883,0.8937654082577303,0.8478563101007021,0.006589149083991935,0.0021003812053104086,0.718860322577578,0.9993088413378769,SEKER
40803,730.673,260.32120750951754,199.75152945837354,1.3032251027833366,0.6412558377882193,41088,227.9297987184406,0.776076536822885,0.993063668224299,0.960408157878069,0.8755713792934343,0.006379952638519656,0.0023129350906798012,0.7666252402378071,0.9990852575052163,SEKER
40821,729.317,249.1711774937047,208.82720248083695,1.1931931019215274,0.5455361186420712,41172,227.98006811042512,0.7584304107909258,0.9914747886913436,0.9644080566502841,0.914953609015172,0.0061039949411750005,0.002638701269073457,0.8371401066498882,0.9988698005964984,SEKER
40822,732.1030000000001,260.562194715134,199.6645624683083,1.3049997029717864,0.642502367436884,41171,227.98286052942402,0.784148754298008,0.9915231595054772,0.9571054063032105,0.8749652296207892,0.006382886549290432,0.0023075975408562445,0.7655641530453605,0.9990609923300428,SEKER
40824,736.4200000000001,257.15855318289175,202.30975907362517,1.2711129426500174,0.6173200046145156,41179,227.98844526481662,0.7493392070484581,0.9913791009980816,0.9459632612499341,0.8865676153601265,0.006299200303323823,0.0024005603814284283,0.7860021366053414,0.9990974887896164,SEKER
40834,737.9159999999999,264.2154584122525,196.98768548928416,1.341279063998269,0.6664418611723869,41174,228.0163668900012,0.7493577038831388,0.9917423616845582,0.9423623667443544,0.8629940438012895,0.006470477014552885,0.002213845223484542,0.744758719636502,0.9989292783785968,SEKER
40838,731.101,242.8971552220815,214.41520428600506,1.1328355003131438,0.469860469191021,41208,228.02753458276607,0.7904231022335773,0.9910211609396233,0.9601068604481283,0.9387822363513476,0.005947822009453977,0.0028496871200642997,0.8813120872888374,0.9983816193358712,SEKER
40841,727.572,248.91606258072287,209.2592310983511,1.1895105476313883,0.5415292466656969,41171,228.03590999342356,0.7886189850930717,0.9919846493891331,0.9695144287923286,0.9161156882733194,0.006094759251260323,0.0026481196234259922,0.8392679543004977,0.99831808392946,SEKER
40841,737.7019999999999,252.144562150776,206.54449976908893,1.2207759704696406,0.573577760440567,41253,228.03590999342356,0.7653717134236615,0.9900128475504811,0.9430708248484322,0.9043855955024083,0.006173809704727504,0.00254769566459204,0.8179133053522458,0.9984889091014195,SEKER
40842,745.5,245.31510796418164,212.28505184892086,1.1555929436744685,0.501156588267858,41338,228.03870172861778,0.7763015338997548,0.9880013546857613,0.9234674015596505,0.9295746341147224,0.006006442093045924,0.00276652191344133,0.8641090003895203,0.9985582634157283,SEKER
40845,749.4689999999999,262.2616069958718,198.68392088440984,1.3199941184392576,0.6527433316607151,41310,228.04707672914319,0.7714172395557906,0.9887436456063907,0.9137795119548222,0.8695404536765949,0.006420898690069085,0.002264304065858426,0.7561006005800986,0.9980483457141204,SEKER
40846,737.982,257.356313243441,202.32595635213377,1.2719886162086431,0.6180095904996503,41230,228.04986832763674,0.7774415196330345,0.990686393402862,0.9424707026431617,0.8861250204183552,0.006300649102566738,0.0023963213308731825,0.7852175518114304,0.9987877871513599,SEKER
40857,779.1919999999999,244.126024647561,214.1132539872939,1.1401724092337047,0.48038022584766016,41497,228.08057365598793,0.7905154399814256,0.9845771983516881,0.8456436044561992,0.9342739021178201,0.005975133383448638,0.0028081754431891564,0.8728677241784581,0.9952196960188934,SEKER
40861,738.4789999999999,258.2850952908528,202.05248691626937,1.2783069351573297,0.6229210189551722,41373,228.09173820509915,0.7840093633677424,0.9876247794455321,0.9415481953409419,0.8831006603313554,0.0063210664274210805,0.002371433524235835,0.7798667762776761,0.996909108614543,SEKER
40863,737.27,263.797806359819,197.70322856724283,1.3343120811509463,0.6620611074959337,41222,228.09732027473044,0.8090882090882091,0.9912910581728204,0.9446849283358375,0.8646672367078244,0.006455664203798521,0.002225956680517344,0.747649430235945,0.9975976672294428,SEKER
40873,730.159,241.99720301434365,215.18449349766152,1.1246033535263706,0.45751403631085297,41202,228.12522857404505,0.7663304334783261,0.992014950730547,0.9634107629765389,0.9426771290431964,0.005920710567228822,0.0028840678670995186,0.8886401696211235,0.9993677148341583,SEKER
40884,733.1370000000001,249.6225809248786,208.70193906633432,1.1960721689583247,0.5486228546153479,41251,228.15592376038015,0.755809439298985,0.9911032459819156,0.9558570936806252,0.9140035445312592,0.006105630097957113,0.002628462419544582,0.8354024794157054,0.9992016555079052,SEKER
40892,723.3040000000001,244.5276054554284,213.02968441139654,1.147856957733665,0.49094833269588306,41189,228.17824493871075,0.7999217527386542,0.9927893369588968,0.9822148196689318,0.9331389988207375,0.005979839710834109,0.0027967565702585635,0.8707483911201683,0.9994945991826797,SEKER
40895,731.7339999999999,258.51960244070625,201.88607089495707,1.2805222336275792,0.624616821472381,41222,228.18661481766296,0.7444116790447066,0.9920673426810926,0.959784222757639,0.8826665856798985,0.006321545480882902,0.0023669537632909085,0.7791003014758097,0.9976552582657242,SEKER
40900,732.6059999999999,253.42787622577768,205.69135924695365,1.2320783777869415,0.584162567279214,41235,228.2005639337207,0.7917150600077429,0.9918758336364739,0.9576178432226299,0.9004556536251676,0.006196280592317303,0.0025128129155996,0.8108203841455278,0.9989942635746069,SEKER
40901,735.2189999999999,257.6465220262476,202.51138413991907,1.2722569801223353,0.6182204861919903,41292,228.20335365461412,0.7893507796819516,0.9905308534340792,0.9508463564752139,0.8857226243922128,0.006299271949982827,0.002391448724151083,0.7845045673602292,0.9980914117619042,SEKER
40906,732.558,257.9461696451866,202.15258664051413,1.275997373725866,0.621138676783828,41246,228.21730174755936,0.7749109646131697,0.9917567764146826,0.9578838411418621,0.8847477830800113,0.006305827253830406,0.0023834155272990007,0.7827786396649948,0.9988234884212392,SEKER
40923,737.658,258.03332318205577,203.1529697853316,1.2701430033472576,0.6165536164947528,41374,228.26471888839296,0.8169241825368307,0.9890994344274182,0.9450770437983749,0.8846327136101738,0.006305337418616812,0.002381990783120013,0.7825750379893,0.9939822090963236,SEKER
40953,732.474,257.8436223757892,202.8515946842574,1.271094874936172,0.6173057533072673,41258,228.34837217624107,0.8020249892287807,0.992607494304135,0.9592043913693974,0.8856079901151837,0.006296086303220502,0.002389002146034425,0.7843015121558554,0.9969216325059975,SEKER
40956,733.353,262.4366095444635,198.9044827748079,1.3194102308975324,0.6523540279538467,41274,228.3567358195797,0.74703146374829,0.9922953917720599,0.9569764544455455,0.8701405501921415,0.0064077695464513995,0.0022659184680978686,0.757144577088683,0.9989843012793935,SEKER
40958,738.536,245.75143253477225,212.5434503870051,1.1562409102106,0.5019930326288906,41400,228.36231141163114,0.7545689019896831,0.9893236714975845,0.9436376620218272,0.9292410182769508,0.006000083806210563,0.002759628156202835,0.8634888700483843,0.9984011570614664,SEKER
40962,727.564,255.6225129984514,204.27850805329933,1.2513431561373831,0.6011432260428655,41237,228.3734621873604,0.7829128440366973,0.9933312316608871,0.9724082020205228,0.8934012091053337,0.00624047929784804,0.0024523579068210085,0.7981657204308725,0.9987792117246361,SEKER
40964,736.1469999999999,246.42041374603002,212.00157605032052,1.1623518010429312,0.509746366400194,41354,228.37903737105822,0.7662551440329218,0.9905692315132756,0.9499114626617804,0.9267861939653834,0.006015535927790988,0.0027376146115764043,0.8589326493248414,0.9983819119173059,SEKER
40965,745.0600000000001,255.4926019125926,204.464342730429,1.2495704556634628,0.5996331543298922,41428,228.38182491186978,0.7853117092247527,0.9888239837790866,0.9273428483908708,0.8938882112524035,0.00623685101702899,0.002456280563912991,0.7990361342160214,0.9984519463238858,SEKER
40973,783.467,267.9969303952498,194.9791849728747,1.3744899509787842,0.6860625025176886,41510,228.4041240136303,0.7730754716981132,0.9870633582269333,0.8388150437381646,0.8522639556981982,0.006540817865307637,0.0021286698286749747,0.7263538501823406,0.9983660679303764,SEKER
40983,722.675,242.20016438584258,215.59586882780494,1.1233989115964291,0.4556563857264932,41281,228.43199482971113,0.7797374429223745,0.9927811826263898,0.9861149610138671,0.9431537563525442,0.005909771475632398,0.0028845657682393276,0.8895390081219143,0.9993071535467257,SEKER
40988,730.0369999999999,248.29058366955525,210.34278425907644,1.1804093234961603,0.5313318783368677,41396,228.4459289626428,0.7549964081121405,0.9901439752633104,0.9664443424562059,0.9200748799506497,0.0060576408624366945,0.002677786694671879,0.8465377847162027,0.9992610937707911,SEKER
41022,728.9019999999999,253.60103975203208,206.2107683069135,1.2298147271076811,0.582081274459247,41344,228.54065853612536,0.7795302523563393,0.9922116873065016,0.97026063240145,0.9011818672336264,0.00618207400302355,0.002515149131352724,0.8121287578306852,0.9987679066878441,SEKER
41031,750.784,268.47221646880143,194.94061837909857,1.3771999837750946,0.6875775419731012,41508,228.56572743967646,0.7429921773142112,0.9885082393755421,0.914727947322132,0.8513570992409846,0.006543155576729825,0.002120381745834873,0.7248089104280235,0.9982068196815178,SEKER
41033,730.9879999999999,249.93212129194782,209.3633166193215,1.1937722678820153,0.5461602598229793,41380,228.57129793374742,0.7594062887494679,0.9916143064282262,0.9649896138711981,0.9145335011451023,0.0060910028828491175,0.002628252247189636,0.8363715247167189,0.9984371318530165,SEKER
41034,742.9599999999999,272.1691927732156,192.30462390068405,1.4153023845842507,0.7076503552818582,41427,228.57408312987423,0.7804998668543387,0.9905134332681584,0.9341634111611693,0.8398234965569122,0.006632772646420423,0.0020352930914419435,0.705303505369078,0.9982177330044871,SEKER
41038,731.3359999999999,253.31928003651643,206.60180613563756,1.226123259881901,0.5786461813368222,41382,228.5852235750194,0.762802282570308,0.9916872069982118,0.9641889433472475,0.9023601501712323,0.006172797895524061,0.002524535325016563,0.8142538406170489,0.9983755734287337,SEKER
41044,741.688,275.9612984914994,189.76659624233397,1.454214303022508,0.7260361288052178,41325,228.60193322478708,0.7708662008864848,0.993200241984271,0.9375987895439777,0.8283840323784708,0.006723547863061578,0.0019530130245717899,0.6862201050996154,0.9979110918574694,SEKER
41059,736.776,266.674255140511,196.51056072962868,1.357047957882619,0.6760087081314825,41387,228.64370200659596,0.7875364431486881,0.9920748060985334,0.9504894280796979,0.8573894839834588,0.006494903800397257,0.002165035868037152,0.7351167272454217,0.9975886535137537,SEKER
41068,727.6279999999999,233.47078865516704,224.0680637950216,1.0419636993371224,0.28093658763040513,41392,228.66875961351533,0.7936765615337044,0.9921724004638578,0.9747530698190624,0.979431992030728,0.005684980730865079,0.0032270515447652953,0.9592870270132801,0.9995422593928672,SEKER
41084,735.0799999999999,255.46537228907698,204.99170719574224,1.2462229608397695,0.5967534758297902,41440,228.71329969177444,0.7633026159334126,0.9914092664092664,0.9554618943710457,0.8952810224039652,0.006218123169337868,0.0024642036575818842,0.8015281090766891,0.9988827332898532,SEKER
41087,735.6759999999999,254.43686510910507,206.01438696840953,1.2350441580962048,0.5868610671016702,41518,228.72164999084285,0.7660340070102171,0.9896189604508888,0.9539840630131092,0.8989328252129059,0.006192636724733008,0.002494389811507355,0.8080802242452568,0.9980147602271756,SEKER
41088,738.8009999999999,251.2635836618799,208.49050090769052,1.2051560266197798,0.5581083556015762,41488,228.72443335612041,0.7689198293285425,0.9903586579251832,0.9459537797661809,0.9102967888251967,0.006115254664668027,0.0025901585739964866,0.8286402437454646,0.9986407836495301,SEKER
41091,738.571,256.80147229644535,203.97997918882703,1.2589543018764637,0.6075126444806423,41504,228.73278324873453,0.7535346866919733,0.9900491518889746,0.946612145457435,0.8906988780215831,0.006249579525843746,0.002426354104762363,0.793344491308907,0.9987844602033433,SEKER
41117,734.27,248.86715508511705,210.53722253087878,1.1820577477629475,0.5332108879408375,41527,228.80513622048713,0.7757924528301887,0.9901269053868568,0.9583402188717195,0.9193866347780271,0.006052658391544058,0.0026675874791993177,0.8452717842084655,0.9991600614890269,SEKER
41126,746.4590000000001,269.42412427883295,194.60137437419226,1.384492402200442,0.6915940939744523,41581,228.83017614986514,0.7703373480435312,0.9890575022245737,0.9275010669569265,0.849330685447617,0.006551187187638792,0.002102843882674107,0.7213626132429188,0.998721057266277,SEKER
41138,736.411,247.42601543107793,211.92264276949842,1.1675298693787781,0.5161318624856218,41560,228.8635584607456,0.7887491372037733,0.9898460057747834,0.953262488790459,0.9249777476390593,0.00601453681343473,0.0027158581945911507,0.8555838336274274,0.9989196815176243,SEKER
41152,733.3919999999999,258.2434720657483,203.1890170385154,1.270951923630779,0.6171929642820779,41470,228.90249833704615,0.7887907074811678,0.9923318061249096,0.9614539198350128,0.8863825153294409,0.006275356533479498,0.0023894771976681506,0.7856739634817465,0.9985538352337441,SEKER
41158,728.6569999999999,253.2860348764135,207.11472181608028,1.2229262732049235,0.5756292868841268,41456,228.91918482776805,0.770402815214136,0.9928116557313779,0.9741320762731556,0.9037971040901057,0.006153992780903191,0.0025329144813560204,0.8168492053616613,0.9989463544833397,SEKER
41169,742.1259999999999,270.21411191901905,194.1998311173996,1.391423001576487,0.6953319640676293,41553,228.9497735687937,0.7588755760368664,0.9907587899790629,0.9393444804258761,0.8472902171645574,0.00656353353054529,0.002086633805995329,0.7179007121027632,0.9989035636679243,SEKER
41182,732.169,259.37761479780283,202.4749612102818,1.281035508032148,0.6250078222256122,41483,228.9859186310011,0.781382817243473,0.9927440156208568,0.9653718359580553,0.8828283767259811,0.006298324870035521,0.0023599888852894584,0.7793859427526311,0.9984210671272316,SEKER
41189,733.8389999999999,249.49696542064873,210.54439695423642,1.1850088106352172,0.5365389098173465,41569,229.00537899380578,0.7834182897139379,0.9908585724939257,0.9611463804499464,0.9178683941414101,0.006057368846552447,0.0026520728212915045,0.8424823889637308,0.9983490537270272,SEKER
41193,735.826,261.5895515191083,200.7088801086394,1.3033282402727546,0.6413284903209975,41524,229.01649845868215,0.7766402714932127,0.9920287062903381,0.9560553305017149,0.875480297774635,0.0063503399004468785,0.0023012417364084423,0.7664657517915635,0.9989564595118325,SEKER
41197,853.6999999999999,250.9006733724671,210.06394586237357,1.194401411162905,0.5468364253702802,42508,229.02761738370003,0.7375044754744002,0.9691587465888774,0.7103377456825924,0.9128218521905037,0.006090265635178948,0.0026083154318446533,0.8332437338365019,0.9952274915369661,SEKER
41202,738.357,255.753689940965,205.54517538535802,1.2442699735543565,0.595056181773174,41593,229.0415152809162,0.7590361445783133,0.9905993797033155,0.9497195294558044,0.8955550761898501,0.006207312507668681,0.0024629328589058966,0.8020188944894083,0.9979280286364303,SEKER
41221,740.389,250.31529179824764,210.04776362912068,1.191706531283175,0.5439266476333942,41665,229.09431960118116,0.7736674174174174,0.9893435737429497,0.9449492219462734,0.9152230291460961,0.006072518662774985,0.002628187701674692,0.8376331930793559,0.9982129470122493,SEKER
41222,748.827,254.81108911848636,206.39046916301845,1.2346068602480993,0.5864651795922816,41791,229.09709843879054,0.7221161425943768,0.9863846282692446,0.9237956922816004,0.8990860610947002,0.006181434406833399,0.0024915756998301767,0.8083557452547829,0.99800154861252,SEKER
41226,738.928,265.78683578917827,197.63499903881637,1.3448368815331972,0.6686418598125331,41595,229.10821345218469,0.7421154953917051,0.9911287414352686,0.9488046752043674,0.8619998532730679,0.006447068252781698,0.002195688859151267,0.7430437470427907,0.9992726356157687,SEKER
41226,769.813,264.34661132804774,198.94246649156327,1.3287590929675044,0.6584986957511155,41931,229.10821345218469,0.7638405098940191,0.9831866638048222,0.8741995553476744,0.8666962375691926,0.006412133394655017,0.0022317726769663896,0.7511623682165942,0.9981138270628044,SEKER
41229,744.176,270.69027693081154,194.42446890546822,1.392264453413139,0.6957806326141115,41609,229.11654935836918,0.7967880333951762,0.9908673604268308,0.9355378131745331,0.8464158814870598,0.006565530983793241,0.002078666572066751,0.7164198444335166,0.997445883124556,SEKER
41243,740.629,255.22172313578002,205.94204974545633,1.2392890303424346,0.5906685746564352,41604,229.1554462444921,0.7790223263193684,0.9913229497163735,0.9448409023692154,0.8978681102414607,0.006188243414295275,0.0024808319058009978,0.8061671433885719,0.9990740974239538,SEKER
41251,743.0169999999999,250.64831039045086,209.90982427583037,1.1940761289051836,0.5464870693688317,41836,229.17767007252297,0.7937158469945356,0.9860168276125825,0.9389594654596868,0.9143395768976791,0.006076175374910932,0.0026196310953308785,0.8360168618814269,0.9982677781348337,SEKER
41256,736.602,260.1405927032961,202.41492278475047,1.2851848526006726,0.6281426716522484,41620,229.19155887072688,0.7846777107860852,0.9912542047092744,0.955501108028683,0.8810295866901934,0.006305521444233471,0.0023434880440316116,0.7762131326234931,0.9975773604374305,SEKER
41262,737.909,267.52254261119907,196.81063490316052,1.359289058453736,0.6773306861702005,41576,229.20822431767644,0.7571009174311927,0.9924475659034058,0.9522577681171995,0.8567809728498046,0.006483508860724131,0.0021551084235505915,0.7340736354374575,0.9978182607494929,SEKER
41265,732.882,255.71832409541273,205.6748567990347,1.243313490405274,0.5942202291867253,41606,229.21655658677122,0.7749586838942307,0.991804066721146,0.9654362528272512,0.8963634397245883,0.006196978652500005,0.0024677223862121993,0.8034674160748956,0.9989618775069851,SEKER
41267,739.795,243.44339280242497,216.17153509626385,1.1261584125496293,0.45989261106386753,41734,229.22211126456793,0.7740658763505402,0.9888100829060239,0.9475234750646834,0.9415827992941307,0.005899226810827658,0.0028602824532720996,0.8865781679265712,0.998427462193346,SEKER
41271,742.954,263.0712141635643,200.35489449643944,1.31302614206033,0.6480480409724536,41698,229.2332202163659,0.753739384531093,0.9897597007050698,0.9395740326667666,0.8713732551287057,0.006374238912639973,0.0022668615928813345,0.7592913497535965,0.9969693916667454,SEKER
41274,734.4099999999999,258.05024675301985,203.80459894946506,1.266164983926616,0.6133818535282769,41601,229.24155157693184,0.7919336889366437,0.992139612028557,0.96163278283167,0.8883601331966141,0.006252125957092112,0.0024019486785284015,0.789183726253106,0.9992368000664108,SEKER
41276,743.6919999999999,266.99859350909105,197.2979577608448,1.3532760122775018,0.6737629490550341,41632,229.24710564909773,0.7337955555555555,0.9914488854727133,0.9378237963017997,0.8586079148813647,0.006468615987719039,0.002168556206153573,0.7372075514969249,0.9976452955106193,SEKER
41283,737.859,265.04571827162505,198.52900707872755,1.3350478208281171,0.6625283491310112,41610,229.26654384210033,0.7671138694811952,0.992141312184571,0.9528715398350757,0.8650075365757941,0.006420214574319334,0.002217220428698023,0.7482380383329239,0.9989335625370754,SEKER
41285,743.117,261.23429698449036,201.43874689222238,1.2968423454513491,0.6367095112102328,41729,229.27209730883345,0.773040482342808,0.9893599175633253,0.9394804772738117,0.8776492977966269,0.0063275837951917244,0.002315803503644339,0.7702682899229123,0.9989165357304295,SEKER
41288,748.997,263.4231340221053,199.97417382138238,1.3172857723987685,0.6509312106473129,41682,229.28042725672287,0.7928716826055229,0.9905474785279017,0.9248547974331554,0.8703883510758121,0.006380137909855291,0.002258718499880874,0.7575758816884713,0.9979439304606761,SEKER
41301,754.588,278.04008713558454,189.3976815774003,1.4680226538145829,0.7321081656597708,41711,229.31652020102464,0.7845934650455927,0.9901704586320156,0.911487342712669,0.8247606399619629,0.006732042496200686,0.0019214908437225546,0.6802301132304668,0.998593216029184,SEKER
41301,742.837,257.2850816168818,205.18652167452908,1.2539082953264957,0.6033103701389265,41673,229.31652020102464,0.7801178648332137,0.9910733568497588,0.9405532238530725,0.8912934973139849,0.0062295121574993785,0.0024250279725579367,0.7944040983541945,0.9961098887676901,SEKER
41322,738.828,262.9878483362513,200.3109105129791,1.3128982723045988,0.6479608576985367,41624,229.37481219075994,0.7427739430543572,0.9927445704401306,0.9512715439086552,0.872187873477278,0.006364354298829953,0.002271821931478633,0.7607116866408163,0.998737059112645,SEKER
41323,795.35,261.98836585132597,201.00002171459735,1.303424564915355,0.6413963207160249,42072,229.37758763028947,0.7393630345321166,0.9821971857767636,0.8208903237576493,0.8755258535428914,0.0063400132093828125,0.0022979777815193394,0.7665455202220086,0.9991342611831862,SEKER
41323,763.4979999999999,264.0834418239405,199.9943150104732,1.3204547429766247,0.6530499226417598,41984,229.37758763028947,0.7553926586721263,0.9842559070121951,0.8908116739680353,0.8685799686873636,0.006390713206300136,0.002243718292052221,0.7544311620049416,0.9961922061187917,SEKER
41323,736.957,252.4834412316139,208.76962868489073,1.209387796597096,0.5624009904223894,41692,229.37758763028947,0.7891490336872661,0.9911493811762448,0.9561310248300134,0.9084856674615408,0.006109997851840716,0.002567397658851948,0.8253462079830414,0.9981636319023789,SEKER
41324,733.7650000000001,261.7714292697179,201.23940155165013,1.3007961028075885,0.6395373926340367,41613,229.38036303623696,0.7905117168818747,0.993055054910725,0.9644911168492731,0.8762620262881837,0.006334610136233615,0.0023037514423209517,0.7678351387146736,0.9987969560387716,SEKER
41326,742.6709999999999,273.57351677370656,192.81184309609887,1.4188626195402088,0.7094161263400404,41701,229.38591374739065,0.7778865339005383,0.9910074098942472,0.9415433140398617,0.8384799685750766,0.0066198886118595205,0.002018371993933427,0.7030486577016613,0.9975294601308068,SEKER
41330,743.053,270.39006222614086,194.86218196923775,1.3875964001512948,0.6932775878745266,41643,229.39701476676692,0.7366544871223598,0.9924837307590711,0.9406665166237347,0.848392921241723,0.006542222652459251,0.002090707263614444,0.7197705488130643,0.9987510224679301,SEKER
41332,740.092,266.3276466039101,197.92166870397696,1.3456214690784822,0.6691236995740861,41673,229.402565075009,0.7500725900116144,0.9918172437789456,0.9482543971657232,0.8613546809737813,0.006443618663599877,0.0021879513764450744,0.7419318864354447,0.9983594749814328,SEKER
41333,731.6809999999999,246.88623876784078,213.66010104330698,1.1555093232769704,0.5010484403547876,41715,229.4053401787728,0.7911379079337736,0.990842622557833,0.9702043933255916,0.9291945202117721,0.005973102333918195,0.002746668696105258,0.8634024563915853,0.9976695881007148,SEKER
41334,734.848,261.41677479077737,201.68662979842549,1.2961532207268713,0.6362126779104088,41654,229.40811524896674,0.7831375521030693,0.9923176645700292,0.9618830374315518,0.8775569793964887,0.006324497382077161,0.0023137001689906276,0.7701062520874894,0.9981756989450994,SEKER
41341,739.1600000000001,255.29358881490012,206.67081867386622,1.2352667418314258,0.5870623091926181,41732,229.42753980047024,0.7441856278801844,0.9906306910763922,0.9508541975600937,0.8986811649501156,0.006175312373065483,0.002484627296098649,0.8076278362360969,0.9976358058797279,SEKER
41346,741.288,236.42263494006323,222.87502343686447,1.0607856873968495,0.333648694171573,41779,229.4414134732874,0.7821201573849879,0.9896359415017114,0.9455171807716695,0.9704714336317855,0.005718150121899657,0.003128717422142294,0.941814803495333,0.9990636637263257,SEKER
41349,864.737,261.98354478770807,201.6718953853995,1.2990582762513918,0.6382991537855082,42172,229.44973727431952,0.7308059384941675,0.9804846817793796,0.694875166856875,0.8758173627288252,0.006335910053150211,0.0022995505905730657,0.7670560528572743,0.9964505138129671,SEKER
41354,745.8230000000001,268.0788838549455,196.58580163554748,1.3636736815405408,0.6798909141659322,41832,229.46360960504808,0.7729141746411483,0.9885733409829796,0.9342343750553129,0.8559555542211533,0.006482538179014013,0.0021464941216713684,0.732659910802042,0.9991090378805847,SEKER
41355,730.92,255.60664110194756,206.3398396886317,1.2387653372594445,0.5902022783614392,41621,229.46638397055602,0.7924691003161828,0.993608995459023,0.9727431877972231,0.8977324805854101,0.0061807917084257665,0.0024763477107264424,0.8059236066980338,0.9983502284566377,SEKER
41355,734.8399999999999,259.10760200510157,203.50046119069302,1.273253143943989,0.6190015360415456,41643,229.46638397055602,0.7935030796093405,0.9930840717527556,0.9623926824535779,0.8856026692958165,0.006265447999156125,0.002377319540641304,0.7842920878638754,0.9986023666430747,SEKER
41360,755.3979999999999,257.5484988100478,204.9093282203815,1.2568900647268362,0.605803200106485,41893,229.48025529497374,0.7743868189477626,0.9872771107344902,0.9108329493345414,0.8910176388340143,0.0062269946520804595,0.0024210483440299238,0.7939124327133419,0.9978606489405124,SEKER
41365,737.7599999999999,246.9702291084775,213.44649102030164,1.157059213894443,0.5030453724305888,41732,229.49412578096636,0.7647015325458008,0.9912057893223426,0.9550204755896711,0.9292380162961461,0.00597051200552345,0.0027459916657522543,0.8634832909299966,0.9991012978144488,SEKER
41376,733.668,260.74695080246704,202.35723871610514,1.2885476815992687,0.6306498305798076,41678,229.5246378996427,0.7624944714727997,0.9927539709199098,0.965960156109216,0.8802581859280215,0.006301888795496593,0.0023339459150842306,0.7748544738932911,0.9984369359120213,SEKER
41378,740.424,262.1846385883308,201.3165446156644,1.3023501823403056,0.6406384961949466,41663,229.53018512180824,0.7330286281179138,0.9931593980270264,0.9484586121668215,0.8754524534986393,0.006336329416316178,0.002295872504702451,0.7664169983367873,0.9981433175326246,SEKER
41386,736.395,250.56859306288578,210.70871794321712,1.1891705075554126,0.5411558767734217,41768,229.55237266996272,0.7726746574063702,0.990854242482283,0.9590508958107361,0.9161258794008211,0.0060544288663530125,0.0026307134796103174,0.8392866269079278,0.9980549041045707,SEKER
41388,750.3439999999999,263.75202241369465,200.00642183048598,1.3187177691586114,0.6518913605274236,41822,229.55791922192296,0.788042650418888,0.9896226866242648,0.923769196029857,0.8703551052278253,0.006372668947851905,0.0022557296346716,0.7575180091961392,0.998952459184605,SEKER
41389,738.976,257.1531925313023,205.2238430722466,1.253037603631536,0.6025771357782904,41854,229.56069244764802,0.7692407768794721,0.9888899507812874,0.9524323318253377,0.8927001457300767,0.006213080589801694,0.002433936100664314,0.7969135501865002,0.9985626452271922,SEKER
41390,736.073,239.65888786143606,220.0216048279174,1.0892516125808522,0.39643792768477515,41819,229.56346563987134,0.7699032738095238,0.9897415050575098,0.9599829400360581,0.9578758696927543,0.005790260639319547,0.0030068710759604237,0.9175261817396505,0.9994168730450662,SEKER
41393,737.3969999999999,258.0760050578216,204.65184270654174,1.2610490169291406,0.6092338870612151,41782,229.5717850155428,0.7626812595581597,0.9906897707146618,0.9566080576766253,0.8895510644784955,0.0062347741177933855,0.0024081526975001308,0.7913010963148245,0.9978694696027606,SEKER
41398,741.7129999999999,258.93338224461826,203.85527788849427,1.270182380984273,0.6165847831192515,41802,229.58564997173988,0.7729275578790142,0.990335390651165,0.9456217272868376,0.8866591398201676,0.006254731683767773,0.002384598286539538,0.7861644302266395,0.9985722078304173,SEKER
41423,738.127,267.2506913452024,197.78696049831908,1.3512048047650427,0.6725185590671551,41677,229.65496219669333,0.7544073723319006,0.9939055114331645,0.9554087830979549,0.859324108913352,0.006451746405262835,0.0021701264325971015,0.7384379241597263,0.9977808711453464,SEKER
41433,749.9350000000001,261.1735592388759,202.5314316248328,1.2895458109567466,0.6313883101313117,42055,229.6826812300222,0.7478340914013428,0.9852098442515753,0.9257825663173834,0.8794254743832957,0.006303515536863753,0.0023257271201118685,0.7733891649942847,0.997320757957716,SEKER
41435,738.189,260.3770596692922,202.78372324725004,1.2840136057262337,0.6272624505954938,41767,229.68822463526828,0.7905028998778999,0.9920511408528264,0.9555250313761097,0.8821369475751738,0.00628398840760932,0.0023472491368505574,0.778165594277245,0.9991752105600226,SEKER
41439,740.182,254.656343761169,207.76311379611337,1.2257052712979357,0.5782539716944606,41835,229.69931104441827,0.7708147321428571,0.9905342416636788,0.9504780490093383,0.9019972078914443,0.006145330335219697,0.0025092606054066525,0.8135989630439614,0.9972325377255178,SEKER
41447,731.549,243.15601919266334,217.16167815821856,1.119700405959775,0.4498660478650631,41752,229.72148225762055,0.7944604178646731,0.9926949607204445,0.9732314240685019,0.944749313713686,0.005866673563651491,0.002882956083898052,0.8925512657624809,0.9993900146141611,SEKER
41454,740.397,264.37675193197924,199.85038202919608,1.3228733878194765,0.6546521744000122,41778,229.74088031399947,0.7884286203355015,0.992244722102542,0.9502699727015785,0.8689904790611425,0.006377593282481287,0.002243348032364406,0.7551444526989141,0.9989605004348967,SEKER
41456,731.423,256.04897430689107,206.5001163647458,1.2399459080915287,0.5912521046887954,41733,229.7464223149969,0.8052210395462668,0.9933625667936645,0.9737781690911602,0.8972753081198876,0.0061764032783406765,0.0024695525628243412,0.8051029785616395,0.9982841438598066,SEKER
41461,737.9749999999999,259.4408430008522,203.86651756665128,1.2726015340701138,0.6184909554590377,41857,229.76027673265145,0.7714679121001805,0.9905392168573954,0.9566792123055708,0.8855979423867996,0.0062574670895745935,0.0023742406271055707,0.7842837155597333,0.9980806595675255,SEKER
41466,733.677,259.6745351161269,203.5889547347343,1.275484396756539,0.6207407886111892,41747,229.77413031494265,0.7548055919615553,0.9932689774115505,0.9680375373108989,0.8848543050714899,0.006262348312258884,0.0023681219047020363,0.7829671412035494,0.998662371778201,SEKER
41493,737.428,251.15915507697736,210.74959655337696,1.1917420445137876,0.5439652227346192,41887,229.8489252306743,0.7840702947845805,0.9905937403012868,0.9588384755223662,0.9151524863197931,0.006053048829368263,0.002618953550553029,0.837504073217299,0.9980888165046089,SEKER
41496,734.055,251.3099159822021,210.37019748592385,1.1946079767264448,0.5470580147425778,41823,229.85723427451725,0.7904,0.992181335628721,0.96774045527414,0.91463654896449,0.00605624436047335,0.002614432057411388,0.8365600167016719,0.999361268962225,SEKER
41505,735.254,255.07152180672176,207.3937438402508,1.229890145592799,0.5821509225439889,41835,229.88215960407396,0.7684118932128707,0.9921118680530656,0.9647959916272766,0.901245885764798,0.006145561301210017,0.002501004645511236,0.8122441466079754,0.9989710717285818,SEKER
41506,732.16,253.96176269025653,208.24602933325633,1.219527515138554,0.5723782784273798,41795,229.88492891831265,0.8040214633012417,0.9930852972843641,0.9729908336285,0.9051950438645006,0.006118675918909472,0.0025339957577706104,0.8193780674368552,0.9992540985402986,SEKER
41528,732.5980000000001,254.67422707610936,207.86487034369142,1.2251912824664486,0.5777707664581965,41852,229.94584539356615,0.8018226753166512,0.9922584344834178,0.9723428443384367,0.9029019074036371,0.006132590711715213,0.002514120131174912,0.8152318543931263,0.9988149611914154,SEKER
41536,734.376,255.60581215052898,207.07206599931425,1.234380943257578,0.5862603863332877,41861,229.96799283839417,0.793110691031296,0.9922362103150905,0.9678266667303528,0.8996978233928561,0.006153837927352874,0.002487210234400707,0.809456173417843,0.9991772748691866,SEKER
41536,742.9539999999998,260.9058138713388,202.92666492815792,1.2857147874760926,0.6285397366596774,41893,229.96799283839417,0.7394826327689651,0.9914782899291051,0.9456070126928552,0.8814214962331154,0.006281438122865438,0.002338693994707374,0.776903854021824,0.9988767735630268,SEKER
41546,734.5020000000001,251.73080103897698,210.2820434999597,1.19711030409035,0.549726186626645,41893,229.9956741453349,0.7787149497675814,0.9917169932924355,0.9677275731242322,0.913657260836044,0.0060590863389731135,0.002604474702176788,0.834769590278423,0.9993112780635799,SEKER
41567,740.413,241.9091234537342,219.22375400864973,1.1034804350818177,0.4227987785995595,42016,230.05379404827582,0.801832561728395,0.9893135948210205,0.9528191446889323,0.9509926321248245,0.0058197397804444434,0.0029362426184813533,0.904386986355702,0.9979733451861239,SEKER
41569,736.5459999999999,260.0592629907173,203.69236422096014,1.2767256346860985,0.6217022890606864,41847,230.05932851135591,0.7639675071675366,0.9933567519774417,0.9628966826315828,0.8846419307108772,0.006256086578717729,0.002363483609214192,0.7825913455718684,0.9991544323750915,SEKER
41574,749.958,269.3261119421502,196.74221295641456,1.368928954772993,0.6829147285177338,42006,230.07316408660017,0.7524705882352941,0.9897157548921582,0.9288761057377641,0.8542549492416787,0.006478234279649545,0.002128072536596427,0.7297515183039031,0.9989779831957667,SEKER
41586,745.494,262.31193115852153,202.04666433085592,1.2982740003516213,0.6377379209120229,42002,230.106366073076,0.7437626312306619,0.9900957097281082,0.9403049197086408,0.8772241699292629,0.006307698051231702,0.002304055918096267,0.7695222443080845,0.9990507224774144,SEKER
41595,747.919,269.6624750054241,197.1131166793178,1.3680595160196083,0.6824177910690853,42004,230.13126441937237,0.7137096774193549,0.9902628321112275,0.9344194300351704,0.853404851434162,0.006483050246554252,0.0021211900435225577,0.7282998404513643,0.9963575272450513,SEKER
41607,756.2789999999999,288.94123996272504,183.6813274311868,1.573057229080469,0.7719322719481395,41983,230.1644580246827,0.708204255319149,0.9910439939975705,0.9141388877212453,0.7965787717058843,0.00694453433226921,0.0017247962779541285,0.6345377395324553,0.9981641782959085,SEKER
41616,748.956,256.66753853635396,206.91519289728654,1.2404480064630374,0.5916971259430255,42085,230.18935008748457,0.7747845028205462,0.9888558868955685,0.9323040916317764,0.8968385772510962,0.006167520629958525,0.0024612033511233803,0.8043194336457702,0.9977164380253751,SEKER
41619,741.4399999999998,261.1093811969575,203.27293398204228,1.2845260610053706,0.6276480216418325,41975,230.19764684360425,0.7963834672789897,0.9915187611673615,0.9513700620194998,0.8816138500591206,0.006273802378648153,0.0023378907593862032,0.7772429806160657,0.9983888643348283,SEKER
41619,813.4799999999999,274.6116964236781,193.63401243977273,1.4181996900420188,0.709088672609702,42244,230.19764684360425,0.7599422999671329,0.9852049995265599,0.7903286852711776,0.8382659946444864,0.006598229088245227,0.0020097153421783035,0.7026898777773098,0.996554566859445,SEKER
41620,734.652,253.45275842995318,209.459805287818,1.2100305262944584,0.5630461845405114,41952,230.200412362527,0.7516705797363193,0.9920861937452327,0.9690554076495531,0.9082576721142593,0.006089686651368409,0.0025562952280341524,0.8249319989544135,0.9981929008519485,SEKER
41626,740.6809999999999,265.1217787999718,200.07279726958834,1.3251265660205327,0.6561334319230768,41933,230.21700477841745,0.7630937322407377,0.9926787971287531,0.9534812022859008,0.8683443729913671,0.006369138970834859,0.0022337186234000083,0.7540219501057704,0.9991745174477652,SEKER
41629,742.831,262.2108879288141,202.5202821508189,1.2947389029092058,0.6351892991965193,42053,230.22530053792977,0.7611533679514372,0.9899174850783535,0.948038126751728,0.8780157923893386,0.006298755385159722,0.0023091057087277884,0.7709117316850782,0.9981294097217743,SEKER
41636,742.8359999999999,252.83935250440354,210.00617072330226,1.2039615390041893,0.5568824512736323,42000,230.2446561477448,0.7762696696248789,0.9913333333333333,0.9481847767497339,0.9106361563860387,0.006072613903938984,0.002575935542189414,0.829258209317538,0.9983949899218012,SEKER
41638,738.396,256.27775966393455,207.200216291712,1.2368604833072543,0.5884980658129682,41948,230.2501860231229,0.796518412242946,0.9926098979689139,0.9596680895955522,0.8984399829507544,0.006154900803687366,0.0024737573889533114,0.807194402964552,0.9983868593736466,SEKER
41641,742.564,254.82947547904243,208.79403405304473,1.220482551787386,0.5732964080112867,42028,230.25848058718034,0.79422086591646,0.9907918530503473,0.9489934905038997,0.9035786780721807,0.006119677132610707,0.0025163565032051177,0.8164544274666696,0.9964683830526303,SEKER
41645,742.133,258.2243287367617,205.7682959388419,1.2549276726941,0.6041657514553922,41965,230.26953954115567,0.788955195604812,0.992374597879185,0.9501873479738583,0.8917422330716807,0.0062006082059493746,0.0024186409131417425,0.7952042102436676,0.9979237688776357,SEKER
41646,741.375,260.34950207530306,203.85644925236625,1.277121734583931,0.6220082180390017,42046,230.27230419666319,0.755482993197279,0.9904866099034391,0.9521541940361858,0.8844737645400205,0.006251488788246244,0.0023599512977780608,0.7822938401595957,0.9990844660989473,SEKER
41673,740.349,251.31098933290406,211.5472593002276,1.1879661791138774,0.5398288394707597,42010,230.34693735265603,0.7557123168431742,0.9919781004522733,0.955414090131416,0.9165812365153774,0.006030547100830371,0.002625550200994952,0.8401211631320582,0.9980355281586977,SEKER
41723,741.1759999999999,261.35379830268573,203.79745308312343,1.28241935484879,0.6260584549230709,42061,230.4850830856201,0.774483961983962,0.9919640522098856,0.9544269542876873,0.8818891655008007,0.00626402220124837,0.0023371634147564993,0.7777285002276985,0.9973740815095224,SEKER
41728,778.3219999999999,281.8221129558337,188.6754226109267,1.4936874610159885,0.7428263894040349,42280,230.4988931051706,0.7830509110698268,0.9869441816461684,0.8656031356792984,0.817887889234915,0.006753789133335738,0.0018642423500650797,0.6689405993571448,0.9991881854242869,SEKER
41735,735.759,257.9670165646636,206.21869929242743,1.2509390149864863,0.6007998576373323,42050,230.5182257426124,0.7739883535477171,0.9925089179548157,0.968811121004327,0.893595734882755,0.006181071440389687,0.002431128277539438,0.7985133374006511,0.9988914877415423,SEKER
41761,759.2589999999999,250.07733310829258,212.9715203573239,1.1742289893442677,0.5241553846394552,42283,230.59001849101173,0.7840821614314414,0.9876546129650214,0.9103341949263728,0.9220748463082733,0.005988298486824851,0.0026702252715658996,0.8502220221944258,0.9983553458396001,SEKER
41768,734.841,248.21198941258783,214.3446964868135,1.1580038763770293,0.5042547152501293,42091,230.60934348915325,0.7828759934023092,0.9923261504834763,0.97200116447696,0.9290822092635712,0.005942635256957188,0.0027313377921175924,0.8631937515700785,0.9995817103825813,SEKER
41780,744.211,257.19755406462286,207.01247664872614,1.2424253756504466,0.5934412425592698,42194,230.64246829028494,0.7630771478667446,0.9901881784139925,0.9479515255008127,0.8967521838576048,0.00615599698574971,0.00245565828715611,0.8041644792533835,0.9991143552211307,SEKER
41781,737.016,257.864006752692,206.6063767173323,1.2480931656116674,0.5983668812219075,42107,230.64522847563924,0.7723919915700738,0.9922578193649512,0.9665734508464825,0.8944452208750588,0.006171800740831765,0.00243672573847189,0.8000322531462329,0.9985147874207168,SEKER
41786,741.814,253.9086133647588,210.1799174828238,1.208053635217116,0.5610560462416243,42121,230.65902890696367,0.7346084877465631,0.9920467225374516,0.9542246103506681,0.9084332581329356,0.006076403899984655,0.0025526924784666457,0.8252509844820208,0.9969474517700093,SEKER
41798,744.664,259.0496348267612,206.01682424658517,1.2574198043005462,0.6062431536392747,42168,230.69214657382756,0.7788834227787717,0.9912255738948966,0.9472064527573956,0.8905326067265155,0.00619765622342603,0.002404399053838732,0.7930483236431226,0.9971946679162117,SEKER
41827,739.449,254.78884882587855,209.26914844761694,1.2175174922626295,0.5704340109024044,42226,230.77216131422276,0.7435911111111111,0.9905508454506702,0.9612804909712567,0.9057388593640192,0.006091492309414458,0.0025288057279991088,0.8203628813620346,0.9988061580612495,SEKER
41836,757.765,272.0990390924447,196.1680849622104,1.3870708843635882,0.6929936490182423,42304,230.79698783463414,0.7739667739667739,0.9889372163388804,0.9155686937623815,0.8482094924128772,0.0065039449061202,0.0020766778469016338,0.7194593430193109,0.9979411071854417,SEKER
41863,754.738,264.75453448492755,202.14203340975916,1.309745083785951,0.6457991361694626,42324,230.87145137770523,0.7841128322313585,0.9891078347982233,0.9235231329440837,0.8720207637873288,0.0063243086851140036,0.002255797580392845,0.7604202124762366,0.9959566349022192,SEKER
41864,739.8209999999999,253.73660052500387,210.59536140597044,1.2048537006276643,0.5577986770820919,42166,230.87420882548327,0.7745420906567992,0.9928378314281648,0.9611635135882252,0.9098971466780266,0.00606097364143426,0.002562662245013417,0.8279128175328141,0.9975138220014872,SEKER
41869,741.2429999999999,256.3946009994205,208.18346834852431,1.231580024261028,0.5837059817758034,42231,230.88799557039886,0.7691982657260436,0.9914280978428169,0.9575936161496196,0.9005181648537158,0.006123733573751952,0.0024840821883480683,0.8109329652315043,0.9987288409938834,SEKER
41869,754.125,267.65795013311475,199.42338593125186,1.3421592903120485,0.6669884606701525,42316,230.88799557039886,0.7811380597014925,0.9894366197183099,0.9251577168758377,0.8626233424248037,0.0063927476207484,0.002183494717508903,0.7441190308961401,0.9987262704152526,SEKER
41874,757.202,250.88921413989033,212.70295327598313,1.1795285879945463,0.5303219723757123,42388,230.90178149213185,0.7494094065430597,0.9878739265829952,0.9177635557596663,0.9203336312552124,0.005991527299514981,0.002651541783543454,0.8470139928194053,0.9990772189618958,SEKER
41884,748.1489999999999,267.7978082080501,199.37496015794696,1.3431867672645446,0.6676245762811692,42242,230.92935086663962,0.7427031244458631,0.9915250224894655,0.9403332985678319,0.8623272625414183,0.006393797350015522,0.002180856531575323,0.7436083077221762,0.9988048389604084,SEKER
41898,732.244,236.6730020799028,225.57899948758947,1.0491801214541856,0.3025762332386979,42223,230.96794246239855,0.7956625773861522,0.9923027733699642,0.9819548350958224,0.9758947595738944,0.0056487899680152465,0.0031604369709161487,0.9523705817637891,0.9992082826443257,SEKER
41913,745.1890000000001,270.2813754642023,198.07663039692082,1.3645293486798125,0.6803865553162152,42269,231.0092834465422,0.7362975194996838,0.9915777520168445,0.9484746772223221,0.8546992298296131,0.006448628718159099,0.0021227575109126406,0.7305107734713338,0.9968033899284251,SEKER
41915,743.8369999999999,247.73946497407707,215.6885956804466,1.1485978857274188,0.49194423398811665,42296,231.0147950187917,0.7851897643400397,0.9909920559863817,0.9519711344786694,0.9324908933785119,0.005910520457451439,0.0027566643157701807,0.8695392662338554,0.9987509627531775,SEKER
41918,750.4419999999999,280.07446833011556,190.7890143825261,1.4679800576388267,0.7320897739779573,42224,231.02306213062053,0.7147144075021313,0.992752936718454,0.9353543124781779,0.8248629855768231,0.0066814845252663665,0.0019080071273431328,0.6803989449747103,0.9988120824613722,SEKER
41923,731.342,250.7143850228845,213.01866256012497,1.1769597180346574,0.5273522534481704,42167,231.0368399929592,0.7872863849765258,0.9942134844783835,0.984965881080069,0.9215140964961815,0.005980354102113028,0.002660201871512838,0.8491882300411737,0.9994603397876096,SEKER
41924,741.2819999999999,266.5760469883049,200.37492024924558,1.3303862911421849,0.6595492133031851,42225,231.03959546683112,0.7980051774021624,0.9928715216104204,0.9587506405976294,0.8666930059059927,0.006358554693929608,0.0022130913541824684,0.7511567664863651,0.9993286646321513,SEKER
41929,742.531,263.70108304509523,202.87529460504987,1.299818608068857,0.6388418131061397,42257,231.0533723432762,0.8001717557251908,0.9922379724069385,0.9556419133568912,0.8761942487121451,0.006289229007252623,0.0022865397947967425,0.7677163614762404,0.9978920123657343,SEKER
41930,752.9109999999998,273.0777325233724,195.72853554074487,1.3951861018575173,0.6973299549561546,42323,231.05612761999055,0.7575429087624209,0.9907142688372752,0.9294958220073241,0.8461185226818695,0.006512705283171295,0.0020590457588605254,0.7159165544253495,0.9988368268239685,SEKER
41931,747.385,261.5048843236716,204.45165500002636,1.2790548666560704,0.6234950591670052,42345,231.05888286384945,0.7799665178571429,0.9902231668437832,0.943314107060497,0.8835738707574642,0.0062365525344893185,0.00234474600790386,0.7807027850853283,0.9985616966753372,SEKER
41942,748.8829999999999,257.15820051878103,207.97024428692893,1.2365143936840757,0.5881870528568961,42395,231.08918837817185,0.7504383610663804,0.9893147776860479,0.9397905115435737,0.8986265571620172,0.006131281305583449,0.0024663119182513574,0.8075296892368601,0.9985220840686061,SEKER
[truncated: 3,413,258 more chars]
