# Supplementary material for: Identification of Dry Bean Varieties Based on Multiple Attributes Using CatBoost Machine Learning Algorithm
Source: Hindawi journal article supplement (doi:10.1155/2023/2556066), 2023-04-21
Supplement: f1 [file 2556066.f1.zip › DryBeanDataset/Dry_Bean_Dataset.xlsx]

## Sheet: Dry_Beans_Dataset
Area	Perimeter	MajorAxisLength	MinorAxisLength	AspectRation	Eccentricity	ConvexArea	EquivDiameter	Extent	Solidity	roundness	Compactness	ShapeFactor1	ShapeFactor2	ShapeFactor3	ShapeFactor4	Class
28395	610.291	208.178	173.889	1.19719	0.549812	28715	190.141	0.763923	0.988856	0.958027	0.913358	0.00733151	0.00314729	0.834222	0.998724	SEKER
28734	638.018	200.525	182.734	1.09736	0.411785	29172	191.273	0.783968	0.984986	0.887034	0.953861	0.00697866	0.00356362	0.909851	0.99843	SEKER
29380	624.11	212.826	175.931	1.20971	0.562727	29690	193.411	0.778113	0.989559	0.947849	0.908774	0.00724391	0.00304773	0.825871	0.999066	SEKER
30008	645.884	210.558	182.517	1.15364	0.498616	30724	195.467	0.782681	0.976696	0.903936	0.928329	0.00701673	0.00321456	0.861794	0.994199	SEKER
30140	620.134	201.848	190.279	1.0608	0.33368	30417	195.897	0.773098	0.990893	0.984877	0.970516	0.00669701	0.00366497	0.9419	0.999166	SEKER
30279	634.927	212.561	181.51	1.17107	0.520401	30600	196.348	0.775688	0.98951	0.943852	0.923726	0.00702007	0.00315278	0.85327	0.999236	SEKER
30477	670.033	211.05	184.039	1.14677	0.489478	30970	196.989	0.762402	0.984081	0.85308	0.933374	0.0069249	0.00324202	0.871186	0.999049	SEKER
30519	629.727	212.997	182.737	1.16559	0.51376	30847	197.124	0.770682	0.989367	0.967109	0.92548	0.00697915	0.00315829	0.856514	0.998345	SEKER
30685	635.681	213.534	183.157	1.16585	0.514081	31044	197.66	0.771561	0.988436	0.95424	0.925658	0.00695891	0.00315155	0.856844	0.998953	SEKER
30834	631.934	217.228	180.897	1.20083	0.553642	31120	198.139	0.783683	0.99081	0.970278	0.912125	0.00704507	0.00300804	0.831973	0.999061	SEKER
30917	640.765	213.56	184.44	1.15788	0.504102	31280	198.406	0.770805	0.988395	0.946258	0.929038	0.00690753	0.00317422	0.863112	0.999384	SEKER
31091	638.558	210.486	188.327	1.11766	0.446622	31458	198.963	0.786377	0.988334	0.958173	0.945254	0.00677001	0.00333398	0.893506	0.99864	SEKER
31107	640.594	214.649	184.969	1.16046	0.507366	31423	199.014	0.761046	0.989944	0.952582	0.927163	0.00690033	0.00314539	0.859632	0.997564	SEKER
31158	642.626	216.485	183.644	1.17883	0.529514	31492	199.177	0.798759	0.989394	0.948119	0.920052	0.00694797	0.00307105	0.846496	0.997872	SEKER
31158	641.105	212.067	187.193	1.13288	0.469924	31474	199.177	0.781313	0.98996	0.952623	0.939219	0.00680618	0.00326701	0.882132	0.999349	SEKER
31178	636.888	212.976	186.562	1.14158	0.482352	31520	199.241	0.76411	0.98915	0.9659	0.935511	0.00683097	0.00322743	0.87518	0.99909	SEKER
31202	644.454	215.641	184.472	1.16896	0.517871	31573	199.318	0.779193	0.988249	0.944079	0.924306	0.00691112	0.00311165	0.854341	0.998693	SEKER
31203	639.782	215.068	184.875	1.16332	0.510947	31558	199.321	0.762984	0.988751	0.957949	0.926783	0.00689253	0.00313668	0.858926	0.999202	SEKER
31272	638.666	212.45	187.536	1.13285	0.469883	31593	199.541	0.770322	0.98984	0.963425	0.939238	0.00679363	0.00326125	0.882167	0.999364	SEKER
31335	635.011	216.79	184.163	1.17716	0.527587	31599	199.742	0.774277	0.991645	0.976511	0.921362	0.00691846	0.00307547	0.848909	0.999302	SEKER
31374	636.401	219.865	182.009	1.20799	0.560995	31604	199.866	0.769197	0.992722	0.97346	0.90904	0.00700789	0.00295188	0.826354	0.99823	SEKER
31530	638.857	213.786	188.066	1.13676	0.475536	31791	200.363	0.768949	0.99179	0.970793	0.937213	0.00678039	0.00322692	0.878369	0.998491	SEKER
31573	674.103	217.307	185.448	1.17179	0.521268	32197	200.499	0.756965	0.980619	0.873119	0.922655	0.00688269	0.00307677	0.851292	0.997538	SEKER
31637	656.711	229.719	175.51	1.30886	0.645191	32045	200.702	0.761823	0.987268	0.921842	0.873686	0.00726109	0.00260978	0.763327	0.999091	SEKER
31675	657.431	236.753	171.211	1.38282	0.690678	32009	200.823	0.740936	0.989565	0.920929	0.84824	0.00747443	0.00238689	0.71951	0.99495	SEKER
31682	646.721	210.046	192.248	1.09257	0.402842	32026	200.845	0.773184	0.989259	0.951894	0.956197	0.00662981	0.00341878	0.914314	0.998956	SEKER
31703	656.305	215.709	187.272	1.15185	0.496263	32093	200.912	0.777111	0.987848	0.924909	0.931402	0.00680405	0.00315861	0.86751	0.999237	SEKER
31748	641.826	219.777	184.115	1.19369	0.546073	32020	201.054	0.77559	0.991505	0.968482	0.914812	0.00692253	0.0029907	0.836881	0.998978	SEKER
31768	650.954	220.959	183.292	1.2055	0.558465	32173	201.118	0.777674	0.987412	0.942105	0.910201	0.00695541	0.00294477	0.828466	0.99872	SEKER
31811	642.092	223.985	180.917	1.23805	0.589565	32052	201.254	0.773877	0.992481	0.9696	0.898515	0.00704111	0.00283089	0.807329	0.999515	SEKER
31821	649.681	213.736	189.969	1.12511	0.458287	32168	201.285	0.772354	0.989213	0.947378	0.941749	0.00671681	0.00325899	0.886891	0.997847	SEKER
31823	662.532	222.873	181.895	1.22528	0.577858	32274	201.292	0.774848	0.986026	0.91104	0.903168	0.00700351	0.00287455	0.815713	0.999481	SEKER
31837	656.404	224.913	180.439	1.24647	0.596968	32238	201.336	0.785246	0.987561	0.928538	0.895174	0.0070645	0.00279828	0.801336	0.998843	SEKER
31915	640.718	216.32	188.065	1.15024	0.494138	32184	201.582	0.777656	0.991642	0.976947	0.931869	0.00677802	0.00315285	0.868381	0.998847	SEKER
31972	639.974	213.687	190.645	1.12087	0.451705	32246	201.762	0.772271	0.991503	0.980968	0.944193	0.00668358	0.00327667	0.891501	0.999253	SEKER
31992	640.338	212.887	191.487	1.11176	0.436968	32258	201.825	0.774212	0.991754	0.980466	0.948038	0.00665439	0.00331583	0.898777	0.999221	SEKER
31994	654.535	212.171	192.423	1.10263	0.421302	32391	201.832	0.789741	0.987744	0.938453	0.951267	0.0066316	0.00334972	0.904909	0.997783	SEKER
32015	653.676	212.93	191.81	1.11011	0.434207	32375	201.898	0.761881	0.98888	0.941539	0.948189	0.00665094	0.00331622	0.899063	0.998057	SEKER
32026	654.237	230.979	176.932	1.30547	0.642831	32349	201.933	0.779449	0.990015	0.940248	0.874246	0.00721224	0.00259887	0.764307	0.997779	SEKER
32038	645.085	224.482	181.941	1.23382	0.585751	32308	201.97	0.770515	0.991643	0.967479	0.899716	0.00700675	0.00283217	0.80949	0.998765	SEKER
32044	652.651	216.147	188.971	1.14381	0.485444	32395	201.989	0.778069	0.989165	0.945354	0.934499	0.00674532	0.00317321	0.873289	0.99888	SEKER
32057	642.082	215.918	189.303	1.14059	0.480971	32301	202.03	0.779805	0.992446	0.977129	0.935679	0.00673545	0.0031846	0.875496	0.998585	SEKER
32066	669.313	236.437	173.231	1.36486	0.68058	32481	202.059	0.780879	0.987223	0.89949	0.8546	0.00737344	0.00242605	0.73034	0.996815	SEKER
32109	663.582	224.472	182.364	1.2309	0.583081	32567	202.194	0.767625	0.985937	0.916321	0.900753	0.00699095	0.00283882	0.811355	0.998697	SEKER
32114	648.566	222.658	183.829	1.21122	0.564236	32393	202.21	0.760671	0.991387	0.959392	0.908165	0.00693335	0.00290926	0.824764	0.998971	SEKER
32167	654.893	217.961	188.205	1.1581	0.504382	32521	202.377	0.760593	0.989115	0.942496	0.928501	0.0067759	0.00310654	0.862115	0.998418	SEKER
32213	658.216	221.481	185.295	1.19529	0.547784	32585	202.521	0.762907	0.988584	0.934338	0.914395	0.00687552	0.00296498	0.836119	0.999401	SEKER
32218	653.595	222.756	184.405	1.20797	0.560976	32566	202.537	0.754432	0.989314	0.947744	0.909232	0.00691403	0.00291481	0.826703	0.998636	SEKER
32233	665.493	221.234	185.592	1.19204	0.54429	32710	202.584	0.775204	0.985417	0.914584	0.915702	0.00686358	0.00297678	0.83851	0.999538	SEKER
32251	644.051	220.981	186.028	1.18789	0.539747	32514	202.641	0.764061	0.991911	0.97704	0.917005	0.00685191	0.00298867	0.840899	0.998897	SEKER
32258	654.808	220.804	186.278	1.18535	0.536919	32612	202.663	0.775806	0.989145	0.945408	0.91784	0.00684494	0.00299651	0.842429	0.998572	SEKER
32262	652.419	222.699	184.513	1.20695	0.559942	32563	202.675	0.781314	0.990756	0.952463	0.910087	0.00690282	0.00292105	0.828259	0.99967	SEKER
32279	646.556	218.182	188.553	1.15714	0.503144	32623	202.729	0.790184	0.989455	0.970326	0.929174	0.00675924	0.00310789	0.863364	0.999029	SEKER
32323	649.59	217.371	189.591	1.14653	0.48915	32615	202.867	0.784844	0.991047	0.962593	0.933272	0.00672498	0.00314705	0.870997	0.998621	SEKER
32338	653.602	221.411	186.136	1.18951	0.541531	32672	202.914	0.782491	0.989777	0.951254	0.916456	0.00684679	0.0029793	0.839892	0.999062	SEKER
32355	657.166	221.28	186.36	1.18737	0.539174	32720	202.967	0.783794	0.988845	0.941458	0.917243	0.00683912	0.00298619	0.841334	0.998979	SEKER
32368	675.385	221.658	186.176	1.19058	0.542702	32806	203.008	0.759099	0.986649	0.891709	0.915861	0.00684806	0.00297211	0.838801	0.998661	SEKER
32376	643.009	219.13	188.3	1.16373	0.511457	32608	203.033	0.784302	0.992885	0.984009	0.926541	0.00676829	0.00307693	0.858479	0.999034	SEKER
32433	653.76	219.837	188.009	1.16929	0.518261	32775	203.212	0.76932	0.989565	0.953587	0.924376	0.00677818	0.00305272	0.85447	0.99912	SEKER
32465	653.85	225.202	183.692	1.22598	0.57851	32767	203.312	0.765034	0.990783	0.954265	0.902796	0.00693678	0.00284247	0.815041	0.999222	SEKER
32514	649.012	221.445	187.134	1.18335	0.534674	32843	203.465	0.784983	0.989983	0.970007	0.918805	0.00681077	0.00299412	0.844203	0.998987	SEKER
32518	651.651	221.263	187.256	1.18161	0.532696	32811	203.478	0.758915	0.99107	0.962285	0.91962	0.00680432	0.00300192	0.845702	0.999285	SEKER
32518	655.131	220.821	187.666	1.17667	0.52702	32842	203.478	0.794032	0.990135	0.952089	0.921459	0.00679074	0.00301996	0.849087	0.999099	SEKER
32525	663.914	225.078	184.215	1.22182	0.574579	33000	203.5	0.769058	0.985606	0.927264	0.90413	0.00692015	0.00285246	0.817451	0.998781	SEKER
32578	657.571	227.038	182.842	1.24171	0.592814	32901	203.665	0.781922	0.990183	0.94678	0.897056	0.00696905	0.00278376	0.804709	0.999218	SEKER
32581	649.583	224.424	184.923	1.21361	0.566603	32851	203.675	0.772062	0.991781	0.970298	0.907544	0.00688819	0.00288241	0.823636	0.999569	SEKER
32615	664.789	218.147	191.002	1.14212	0.483095	33016	203.781	0.808563	0.987854	0.927384	0.934147	0.00668854	0.00314175	0.87263	0.996644	SEKER
32622	657.009	235.271	177.158	1.32803	0.658024	32902	203.803	0.779312	0.99149	0.949681	0.866248	0.00721203	0.00250499	0.750385	0.996532	SEKER
32698	653.049	225.014	185.144	1.21535	0.568318	32994	204.04	0.767685	0.991029	0.963473	0.906788	0.00688159	0.00287006	0.822264	0.999338	SEKER
32705	654.454	223.876	186.15	1.20266	0.555544	33021	204.062	0.77947	0.99043	0.959546	0.911496	0.00684531	0.00291469	0.830825	0.999204	SEKER
32713	660.043	215.416	193.486	1.11334	0.439592	33020	204.087	0.799516	0.990703	0.943595	0.947407	0.00658504	0.00327254	0.89758	0.999312	SEKER
32729	656.679	214.266	194.794	1.09996	0.416528	33066	204.137	0.769153	0.989808	0.953754	0.952728	0.00654666	0.00332717	0.90769	0.998424	SEKER
32774	660.614	222.87	187.479	1.18877	0.540717	33120	204.277	0.790154	0.989553	0.943721	0.916575	0.00680021	0.00296056	0.84011	0.998699	SEKER
32775	649.807	220.025	189.809	1.15919	0.505764	33062	204.28	0.772631	0.991319	0.975402	0.928441	0.0067132	0.00307699	0.862002	0.999224	SEKER
32795	651.03	225.21	185.6	1.21342	0.566416	33091	204.343	0.775993	0.991055	0.972334	0.907341	0.00686721	0.00287107	0.823268	0.998967	SEKER
32796	654.824	223.145	187.419	1.19062	0.542745	33111	204.346	0.80082	0.990487	0.961129	0.915751	0.00680404	0.0029516	0.838601	0.998456	SEKER
32799	653.729	219.906	190.112	1.15671	0.502602	33087	204.355	0.746178	0.991296	0.964439	0.929286	0.00670464	0.00308427	0.863572	0.998905	SEKER
32829	658.101	221.599	189.003	1.17247	0.522071	33154	204.448	0.789785	0.990197	0.952538	0.922604	0.00675011	0.00301683	0.851197	0.998001	SEKER
32836	669.19	218.406	191.759	1.13896	0.478675	33225	204.47	0.802915	0.988292	0.921428	0.936193	0.00665142	0.00315178	0.876458	0.998253	SEKER
32849	664.105	230.722	181.744	1.26949	0.616038	33245	204.511	0.746568	0.988088	0.935963	0.886393	0.00702372	0.00267457	0.785693	0.997432	SEKER
32870	655.512	220.358	190.021	1.15965	0.506353	33198	204.576	0.781243	0.99012	0.961276	0.92838	0.00670393	0.00307194	0.861889	0.999493	SEKER
32885	659.728	227.067	184.56	1.23032	0.582547	33225	204.623	0.78567	0.989767	0.949463	0.901154	0.00690489	0.00280888	0.812079	0.999117	SEKER
32920	671.612	219.093	191.462	1.14432	0.486133	33376	204.732	0.777975	0.986337	0.917134	0.93445	0.00665532	0.00313021	0.873197	0.999213	SEKER
32925	656.646	225.128	186.462	1.20737	0.560365	33252	204.747	0.768683	0.990166	0.959562	0.909469	0.00683761	0.0028856	0.827135	0.998658	SEKER
32934	668.197	221.409	189.602	1.16776	0.516408	33401	204.775	0.776709	0.986018	0.926927	0.924874	0.0067228	0.00303431	0.855392	0.998889	SEKER
32947	668.231	209.693	200.25	1.04716	0.296721	33336	204.816	0.765319	0.988331	0.927198	0.976739	0.00636456	0.00357324	0.954019	0.99901	SEKER
32951	688.26	226.649	185.522	1.22169	0.574448	33524	204.828	0.770802	0.982908	0.874125	0.903723	0.00687837	0.00283013	0.816716	0.99777	SEKER
32988	676.797	224.752	187.177	1.20074	0.553547	33461	204.943	0.766699	0.985864	0.905001	0.911864	0.00681314	0.00290567	0.831496	0.998412	SEKER
33006	669.769	223.528	188.243	1.18744	0.53925	33458	204.999	0.757018	0.986491	0.924597	0.917107	0.00677234	0.00295528	0.841085	0.998741	SEKER
33010	665.85	224.971	186.89	1.20376	0.556677	33374	205.011	0.791588	0.989093	0.935627	0.911278	0.00681525	0.00289911	0.830427	0.999637	SEKER
33013	652.684	223.782	188.029	1.19014	0.542224	33289	205.021	0.789785	0.991709	0.973843	0.916163	0.0067786	0.00294585	0.839354	0.998953	SEKER
33019	655.703	224.45	187.503	1.19705	0.549663	33340	205.039	0.764329	0.990372	0.965071	0.913518	0.00679761	0.00292014	0.834515	0.998957	SEKER
33051	663.071	218.951	192.474	1.13756	0.47669	33423	205.139	0.777927	0.98887	0.944658	0.936914	0.00662465	0.00314877	0.877808	0.998562	SEKER
33058	655.511	224.446	187.878	1.19464	0.547087	33320	205.16	0.799275	0.992137	0.966777	0.914075	0.00678946	0.00292376	0.835533	0.998157	SEKER
33062	667.966	222.039	189.781	1.16997	0.519089	33439	205.173	0.778662	0.988726	0.931173	0.924039	0.00671584	0.00302023	0.853847	0.998979	SEKER
33078	659.456	235.56	178.931	1.31648	0.650392	33333	205.222	0.787721	0.99235	0.955823	0.87121	0.00712135	0.00253066	0.759007	0.999221	SEKER
33078	652.214	221.387	190.355	1.16302	0.510583	33327	205.222	0.772417	0.992529	0.977167	0.926985	0.00669287	0.00304848	0.859301	0.999387	SEKER
33089	663.915	217.336	194.207	1.11909	0.448903	33466	205.256	0.77441	0.988735	0.943341	0.944421	0.00656822	0.00322322	0.891931	0.998154	SEKER
33090	653.809	228.407	184.689	1.23671	0.588365	33352	205.26	0.769356	0.992144	0.972758	0.898658	0.00690259	0.00277696	0.807587	0.998753	SEKER
33143	648.385	222.526	189.737	1.17281	0.52248	33377	205.424	0.76998	0.992989	0.990685	0.923144	0.00671413	0.00300779	0.852195	0.999465	SEKER
33159	653.801	222.444	189.98	1.17088	0.520175	33415	205.473	0.788111	0.992339	0.97481	0.923709	0.00670841	0.00301258	0.853238	0.999038	SEKER
33168	680.621	234.316	180.583	1.29755	0.63722	33542	205.501	0.76124	0.98885	0.899743	0.877028	0.00706451	0.0025782	0.769179	0.998049	SEKER
33171	654.338	222.254	190.361	1.16753	0.516138	33429	205.511	0.790237	0.992282	0.973563	0.924667	0.00670024	0.00302143	0.855009	0.998253	SEKER
33194	664.658	232.309	182.086	1.27582	0.621002	33520	205.582	0.773699	0.990274	0.94422	0.884952	0.00699851	0.00264767	0.78314	0.999146	SEKER
33236	660.788	210.858	200.927	1.04942	0.303273	33611	205.712	0.768285	0.988843	0.956521	0.975595	0.00634427	0.00354518	0.951785	0.998826	SEKER
33248	660.068	230.97	183.429	1.25918	0.607696	33511	205.749	0.787662	0.992152	0.958955	0.890805	0.00694688	0.00269836	0.793533	0.999199	SEKER
33251	658.962	217.452	194.983	1.11523	0.442694	33565	205.758	0.757944	0.990645	0.962263	0.946223	0.00653972	0.0032338	0.895339	0.998512	SEKER
33276	704.493	234.788	180.705	1.29929	0.638462	33857	205.836	0.759657	0.98284	0.842534	0.876687	0.00705578	0.002571	0.76858	0.998605	SEKER
33316	670.587	229.218	185.279	1.23715	0.588757	33699	205.959	0.782617	0.988635	0.931006	0.89853	0.00688012	0.00276634	0.807356	0.99882	SEKER
33319	668.601	225.017	188.837	1.1916	0.543809	33732	205.969	0.796039	0.987756	0.936629	0.915346	0.00675342	0.00292445	0.837858	0.99839	SEKER
33325	674.433	223.825	189.736	1.17967	0.530484	33701	205.987	0.798969	0.988843	0.920667	0.920303	0.00671644	0.00297195	0.846957	0.999129	SEKER
33330	653.776	224.36	189.431	1.18439	0.535842	33580	206.003	0.790185	0.992555	0.979912	0.918178	0.00673148	0.0029512	0.843051	0.998499	SEKER
33333	679.262	220.531	192.717	1.14433	0.486151	33834	206.012	0.772241	0.985192	0.907841	0.934162	0.006616	0.00310788	0.872658	0.998608	SEKER
33338	659.103	232.264	182.919	1.26977	0.616255	33639	206.027	0.776747	0.991052	0.964368	0.88704	0.00696694	0.00266069	0.78684	0.999104	SEKER
33344	661.508	225.318	188.669	1.19425	0.546678	33692	206.046	0.763352	0.989671	0.957541	0.914467	0.00675738	0.00291494	0.836249	0.998694	SEKER
33382	659.434	222.87	190.92	1.16735	0.515909	33730	206.163	0.781688	0.989683	0.964672	0.925038	0.00667636	0.00301548	0.855695	0.998892	SEKER
33399	664.701	221.56	192.09	1.15342	0.498328	33752	206.216	0.761491	0.989541	0.949928	0.930745	0.00663373	0.00307086	0.866286	0.999189	SEKER
33421	654.804	219.544	194.025	1.13152	0.467931	33691	206.284	0.763385	0.991986	0.979505	0.9396	0.00656905	0.00315831	0.882848	0.998963	SEKER
33423	659.036	224.168	189.981	1.17995	0.530805	33707	206.29	0.772983	0.991574	0.967023	0.920246	0.006707	0.00296705	0.846853	0.999244	SEKER
33427	665.61	228.223	186.626	1.22289	0.575596	33789	206.302	0.754492	0.989286	0.948129	0.903949	0.00682751	0.00281202	0.817124	0.999254	SEKER
33429	658.605	229.446	185.698	1.23559	0.587351	33713	206.308	0.791744	0.991576	0.968463	0.899158	0.00686368	0.00276746	0.808485	0.998954	SEKER
33431	666.841	219.907	193.68	1.13541	0.473607	33788	206.314	0.788709	0.989434	0.944745	0.938188	0.00657795	0.00314362	0.880197	0.999387	SEKER
33433	657.349	225.003	189.566	1.18693	0.538687	33708	206.321	0.776807	0.991842	0.972284	0.916971	0.00672995	0.00293503	0.840835	0.998016	SEKER
33446	656.077	224.234	190.257	1.17859	0.529238	33713	206.361	0.767815	0.99208	0.976437	0.920292	0.00670436	0.00296647	0.846938	0.99819	SEKER
33447	664.412	226.119	188.741	1.19804	0.550709	33791	206.364	0.770225	0.98982	0.952121	0.912635	0.00676051	0.002893	0.832903	0.997851	SEKER
33459	655.414	219.13	194.543	1.12638	0.460234	33765	206.401	0.786309	0.990937	0.978794	0.941911	0.00654921	0.00317986	0.887196	0.999322	SEKER
33468	659.987	224.46	189.954	1.18165	0.53275	33748	206.429	0.79233	0.991703	0.965537	0.919668	0.0067067	0.00295947	0.845789	0.999429	SEKER
33498	657.523	227.938	187.316	1.21686	0.569798	33745	206.521	0.781495	0.99268	0.973659	0.906041	0.00680453	0.00282858	0.820909	0.998935	SEKER
33534	657.067	218.845	195.193	1.12117	0.452186	33793	206.632	0.783505	0.992336	0.976059	0.944195	0.00652606	0.00319946	0.891504	0.999529	SEKER
33538	658.284	227.519	187.944	1.21057	0.563582	33800	206.644	0.760516	0.992249	0.972569	0.908252	0.00678391	0.00284765	0.824923	0.998623	SEKER
33539	662.418	223.684	191.201	1.16989	0.518988	33915	206.647	0.764265	0.988913	0.960496	0.923839	0.00666936	0.00299673	0.853478	0.998474	SEKER
33547	653.512	213.754	199.926	1.06917	0.353837	33832	206.672	0.78357	0.991576	0.987089	0.966869	0.00637178	0.00343487	0.934835	0.999495	SEKER
33560	669.259	227.936	187.857	1.21335	0.566352	33897	206.712	0.739859	0.990058	0.94155	0.906886	0.0067919	0.00283388	0.822443	0.997912	SEKER
33576	666.339	224.589	190.463	1.17917	0.529912	33927	206.761	0.761792	0.989654	0.950273	0.920623	0.00668897	0.00296391	0.847546	0.999403	SEKER
33583	657.754	221.711	192.95	1.14906	0.49256	33868	206.783	0.775302	0.991585	0.975444	0.932669	0.00660188	0.00308147	0.869871	0.999532	SEKER
33584	658.848	223.735	191.354	1.16922	0.518179	33884	206.786	0.748057	0.991146	0.972236	0.924245	0.00666196	0.00299868	0.854228	0.998779	SEKER
33607	690.171	214.765	199.524	1.07639	0.369996	34162	206.857	0.770803	0.983754	0.886597	0.963176	0.00639049	0.00339264	0.927709	0.998574	SEKER
33620	670.224	222.776	192.226	1.15893	0.505432	34012	206.897	0.783245	0.988475	0.940519	0.928721	0.0066263	0.00304083	0.862523	0.999602	SEKER
33623	659.408	217.372	197.084	1.10294	0.421848	33918	206.906	0.793238	0.991303	0.971713	0.951853	0.00646498	0.00327361	0.906024	0.999292	SEKER
33631	669.076	224.889	190.753	1.17895	0.529661	34009	206.931	0.762884	0.988885	0.944058	0.920144	0.00668697	0.00295687	0.846666	0.99818	SEKER
33639	663.03	224.663	190.853	1.17715	0.527575	33919	206.955	0.786252	0.991745	0.961583	0.921182	0.00667864	0.00296653	0.848575	0.998901	SEKER
33717	664.363	231.623	185.653	1.24761	0.59795	33985	207.195	0.766226	0.992114	0.959948	0.894538	0.00686961	0.00271335	0.800198	0.998334	SEKER
33731	671.696	231.172	186.126	1.24202	0.593081	34073	207.238	0.803215	0.989963	0.939493	0.896467	0.0068534	0.00273038	0.803653	0.99815	SEKER
33736	655.729	221.39	194.136	1.14039	0.480683	33988	207.253	0.786864	0.992586	0.985949	0.936145	0.00656243	0.00310898	0.876368	0.9994	SEKER
33794	665.826	219	196.578	1.11406	0.440779	34127	207.432	0.777732	0.990242	0.957917	0.947177	0.00648044	0.00321742	0.897143	0.999474	SEKER
33809	669.341	230.247	187.164	1.23019	0.582427	34143	207.478	0.784068	0.990218	0.948303	0.901107	0.00681024	0.00276979	0.811994	0.998906	SEKER
33824	656.339	220.754	195.282	1.13044	0.466328	34079	207.524	0.788438	0.992517	0.986685	0.940068	0.00652655	0.00314413	0.883728	0.999	SEKER
33838	661.029	222.974	193.484	1.15242	0.497014	34146	207.567	0.782128	0.99098	0.973136	0.930902	0.00658944	0.00305242	0.866579	0.998659	SEKER
33845	670.945	226.382	190.521	1.18822	0.540111	34159	207.588	0.763927	0.990808	0.94478	0.916983	0.00668878	0.00291723	0.840857	0.999125	SEKER
33849	669.571	221.61	194.671	1.13838	0.477854	34239	207.6	0.786272	0.988609	0.948773	0.93678	0.00654703	0.0031101	0.877557	0.998996	SEKER
33858	664.46	234.335	184.139	1.2726	0.618487	34142	207.628	0.781254	0.991682	0.963681	0.88603	0.00692111	0.00263118	0.78505	0.999051	SEKER
33860	683.315	225.535	191.521	1.1776	0.528094	34319	207.634	0.775183	0.986625	0.911286	0.920629	0.00666081	0.00295152	0.847557	0.998082	SEKER
33864	662.898	221.216	195.064	1.13407	0.471667	34167	207.646	0.7716	0.991132	0.9684	0.938657	0.0065325	0.00312814	0.881077	0.999206	SEKER
33866	668.421	230.931	186.861	1.23585	0.587585	34171	207.652	0.799934	0.991074	0.952519	0.899196	0.00681897	0.0027499	0.808554	0.999248	SEKER
33876	666.966	228.149	189.165	1.20609	0.559059	34211	207.683	0.788272	0.990208	0.956962	0.910295	0.00673483	0.00285256	0.828637	0.999409	SEKER
33930	666.214	224.151	192.861	1.16224	0.509611	34251	207.849	0.762729	0.990628	0.960652	0.92727	0.00660628	0.00301274	0.85983	0.999332	SEKER
33946	667.313	231.543	187.029	1.238	0.589522	34246	207.898	0.791227	0.99124	0.957942	0.897881	0.00682091	0.00273462	0.80619	0.998065	SEKER
33946	668.564	234.755	184.294	1.27381	0.619435	34280	207.898	0.761531	0.990257	0.954361	0.885594	0.00691554	0.00262389	0.784277	0.999019	SEKER
33961	690.353	238.192	181.654	1.31124	0.646827	34379	207.943	0.770405	0.987841	0.895464	0.873006	0.00701371	0.00251302	0.762139	0.999348	SEKER
33961	667.497	233.114	185.733	1.2551	0.60431	34279	207.943	0.771192	0.990723	0.957837	0.892025	0.00686416	0.00268087	0.795709	0.998695	SEKER
33969	666.389	222.362	194.769	1.14167	0.482474	34260	207.968	0.764706	0.991506	0.961251	0.935268	0.00654602	0.0030896	0.874727	0.998649	SEKER
33972	672.812	232.988	185.916	1.25319	0.602709	34349	207.977	0.785661	0.989024	0.943069	0.892651	0.00685824	0.00268608	0.796825	0.998576	SEKER
33993	669.092	219.751	197.092	1.11496	0.442252	34299	208.041	0.778228	0.991078	0.954174	0.946716	0.00646458	0.00320331	0.896271	0.999309	SEKER
33996	663.743	223.096	194.381	1.14773	0.490774	34285	208.051	0.764694	0.991571	0.969701	0.932559	0.00656243	0.00306161	0.869667	0.998141	SEKER
34004	659.963	229.06	189.165	1.2109	0.563915	34277	208.075	0.781971	0.992035	0.981072	0.908388	0.00673626	0.00282933	0.825168	0.999195	SEKER
34027	670.16	231.658	187.412	1.23609	0.587801	34334	208.145	0.778507	0.991058	0.952087	0.898504	0.00680806	0.00273705	0.80731	0.997904	SEKER
34036	666.067	226.928	191.11	1.18742	0.539222	34369	208.173	0.753843	0.990311	0.964079	0.917352	0.00666729	0.00291256	0.841535	0.999254	SEKER
34051	677.272	227.621	190.664	1.19383	0.546225	34502	208.219	0.757902	0.986928	0.932854	0.914761	0.00668471	0.00288731	0.836788	0.998985	SEKER
34053	671.582	232.436	186.791	1.24436	0.595136	34362	208.225	0.743986	0.991008	0.948784	0.895837	0.00682572	0.00271172	0.802524	0.998631	SEKER
34060	662.146	220.438	196.882	1.11965	0.44978	34367	208.246	0.789083	0.991067	0.976218	0.944692	0.00647206	0.00317968	0.892443	0.99922	SEKER
34082	668.346	230.627	188.391	1.22419	0.576828	34364	208.314	0.801741	0.991794	0.958809	0.903249	0.00676683	0.0027784	0.815859	0.998767	SEKER
34097	680.595	227.819	190.81	1.19396	0.546359	34502	208.359	0.762251	0.988262	0.925014	0.914583	0.0066815	0.00288367	0.836461	0.998699	SEKER
34104	667.289	229.479	189.544	1.21069	0.563705	34421	208.381	0.798427	0.990791	0.96247	0.908062	0.00672879	0.00282214	0.824576	0.998304	SEKER
34113	673.914	221.242	196.51	1.12586	0.459432	34492	208.408	0.774662	0.989012	0.943889	0.941991	0.00648557	0.00315003	0.887347	0.999025	SEKER
34130	666.585	235.541	184.778	1.27473	0.620151	34392	208.46	0.795515	0.992382	0.965239	0.885026	0.0069013	0.00261177	0.783271	0.998456	SEKER
34131	668.091	224.338	193.804	1.15755	0.503674	34473	208.463	0.770625	0.990079	0.960921	0.929237	0.00657285	0.00302302	0.863482	0.999524	SEKER
34151	674.271	231.514	188.036	1.23122	0.583377	34580	208.524	0.750456	0.987594	0.94394	0.9007	0.00677912	0.00275216	0.811261	0.998842	SEKER
34151	662.129	226.525	192.236	1.17837	0.528983	34389	208.524	0.778211	0.993079	0.978877	0.920536	0.00663304	0.00293803	0.847387	0.998533	SEKER
34179	677.064	225.061	193.593	1.16255	0.509988	34576	208.61	0.778016	0.988518	0.936936	0.926905	0.00658476	0.00299821	0.859154	0.998805	SEKER
34191	661.403	223.981	194.475	1.15172	0.496102	34445	208.646	0.77198	0.992626	0.982176	0.931537	0.00655087	0.00304284	0.867761	0.99942	SEKER
34207	668.737	228.032	191.415	1.1913	0.54348	34515	208.695	0.757731	0.991076	0.961201	0.9152	0.00666625	0.00288486	0.83759	0.997818	SEKER
34207	661.138	226.874	192.195	1.18044	0.531362	34421	208.695	0.774299	0.993783	0.983424	0.919875	0.00663237	0.0029293	0.84617	0.998849	SEKER
34220	677.527	233.183	186.959	1.24724	0.597633	34577	208.735	0.773753	0.989675	0.936778	0.895155	0.00681423	0.00269892	0.801302	0.999417	SEKER
34222	671.994	223.298	195.238	1.14372	0.485316	34576	208.741	0.784333	0.989762	0.952323	0.934808	0.00652499	0.00307361	0.873866	0.999459	SEKER
34239	666.439	232.686	187.724	1.23951	0.590865	34510	208.793	0.769554	0.992147	0.968746	0.897315	0.00679594	0.00271774	0.805174	0.998021	SEKER
34246	684.324	229.909	189.991	1.2101	0.563117	34732	208.814	0.779558	0.986007	0.918959	0.908249	0.00671344	0.00281802	0.824916	0.998232	SEKER
34253	672.539	228.004	191.369	1.19144	0.543638	34556	208.836	0.792894	0.991232	0.951642	0.915928	0.00665648	0.00288981	0.838924	0.999529	SEKER
34254	668.704	223.969	194.929	1.14898	0.49245	34575	208.839	0.775363	0.990716	0.962617	0.932445	0.00653847	0.00304894	0.869453	0.99898	SEKER
34259	676.402	227.545	191.868	1.18594	0.537585	34623	208.854	0.770125	0.989487	0.940968	0.917857	0.0066419	0.00290786	0.842462	0.999114	SEKER
34276	689.626	229.559	190.412	1.20559	0.558556	34738	208.906	0.763113	0.9867	0.905676	0.91003	0.00669737	0.0028334	0.828155	0.998419	SEKER
34291	671.507	230.658	189.624	1.2164	0.569344	34619	208.951	0.782043	0.990525	0.955628	0.905892	0.00672649	0.00279431	0.820641	0.998225	SEKER
34313	671.844	220.934	198.104	1.11524	0.442709	34600	209.018	0.796976	0.991705	0.955282	0.946067	0.00643878	0.00318179	0.895043	0.99819	SEKER
34321	669.531	227.996	191.827	1.18855	0.54047	34652	209.043	0.787468	0.990448	0.962118	0.916871	0.00664304	0.00289587	0.840652	0.999154	SEKER
34327	677.311	231.158	189.304	1.22109	0.573881	34714	209.061	0.793596	0.988852	0.940307	0.904407	0.006734	0.00277913	0.817952	0.998795	SEKER
34333	665.686	229.215	190.872	1.20088	0.553694	34592	209.079	0.779056	0.992513	0.973605	0.912154	0.00667623	0.00285091	0.832025	0.999165	SEKER
34337	667.785	229.807	190.63	1.20551	0.558475	34583	209.091	0.809797	0.992887	0.967607	0.909858	0.00669269	0.00282927	0.827841	0.997974	SEKER
34349	674.863	238.231	183.725	1.29667	0.636588	34645	209.128	0.783365	0.991456	0.947748	0.877836	0.00693561	0.00254049	0.770596	0.999211	SEKER
34390	680.24	245.015	178.975	1.36899	0.682951	34759	209.253	0.793933	0.989384	0.933937	0.854042	0.00712459	0.00233806	0.729387	0.998525	SEKER
34394	669.762	230.921	189.905	1.21598	0.568936	34730	209.265	0.781682	0.990325	0.9635	0.906218	0.00671399	0.00279313	0.821231	0.998601	SEKER
34395	665.156	231.717	189.19	1.22479	0.57739	34638	209.268	0.791235	0.992985	0.976918	0.903118	0.00673694	0.00276453	0.815622	0.998963	SEKER
34397	678.85	229.775	190.932	1.20344	0.556345	34776	209.274	0.772203	0.989102	0.937957	0.910779	0.00668008	0.0028354	0.829519	0.998276	SEKER
34410	684.481	232.458	188.94	1.23033	0.582556	34802	209.314	0.800698	0.988736	0.922936	0.900436	0.00675553	0.00273938	0.810786	0.997533	SEKER
34412	667.199	233.959	187.398	1.24846	0.598681	34677	209.32	0.78746	0.992358	0.971424	0.894685	0.00679876	0.00268714	0.800462	0.999343	SEKER
34419	687.797	224.143	195.615	1.14584	0.488214	34885	209.341	0.775203	0.986642	0.914298	0.933961	0.0065122	0.00305648	0.872282	0.999494	SEKER
34421	678.034	232.404	189.15	1.22868	0.581028	34762	209.347	0.755708	0.99019	0.940872	0.90079	0.00675181	0.00274216	0.811422	0.996975	SEKER
34425	680.503	232.646	188.554	1.23384	0.585768	34791	209.359	0.758929	0.98948	0.934165	0.899906	0.00675804	0.00273394	0.809831	0.9992	SEKER
34428	688.178	229.732	191.379	1.20041	0.553195	34908	209.368	0.77777	0.98625	0.913524	0.911357	0.00667284	0.00283952	0.830572	0.997023	SEKER
34441	675.683	228.698	191.915	1.19166	0.543877	34826	209.408	0.790874	0.988945	0.947981	0.915653	0.00664028	0.00287932	0.83842	0.999113	SEKER
34443	684.507	234.607	187.573	1.25075	0.600643	34874	209.414	0.78465	0.987641	0.923751	0.892615	0.00681147	0.00266733	0.796761	0.996552	SEKER
34447	682.912	225.087	195.329	1.15235	0.496927	34853	209.426	0.745784	0.988351	0.928179	0.930421	0.00653431	0.00302063	0.865683	0.99757	SEKER
34461	675.775	246.725	178.158	1.38487	0.6918	34691	209.469	0.770181	0.99337	0.948273	0.848995	0.00715956	0.00229449	0.720792	0.998204	SEKER
34469	666.834	230.158	190.994	1.20506	0.558005	34747	209.493	0.789668	0.991999	0.974099	0.910214	0.00667725	0.00282716	0.828489	0.998375	SEKER
34474	672.3	225.649	194.65	1.15926	0.505848	34774	209.508	0.793308	0.991373	0.958463	0.928467	0.0065455	0.00300047	0.862052	0.999338	SEKER
34475	677.676	241.043	182.369	1.32173	0.653898	34878	209.511	0.776464	0.988445	0.943344	0.869185	0.00699183	0.00246161	0.755483	0.998546	SEKER
34483	687.567	233.741	188.588	1.23943	0.59079	35051	209.535	0.740678	0.983795	0.916611	0.896444	0.00677843	0.00270024	0.803612	0.996018	SEKER
34491	674.657	233.183	188.576	1.23654	0.588213	34829	209.56	0.785851	0.990295	0.952247	0.898693	0.00676069	0.0027203	0.807649	0.998693	SEKER
34503	678.24	236.545	185.893	1.27248	0.618395	34885	209.596	0.747725	0.98905	0.94254	0.886075	0.00685577	0.00260686	0.785129	0.99906	SEKER
34509	668.332	230.329	190.92	1.20642	0.559399	34776	209.614	0.783654	0.992322	0.970863	0.910064	0.00667448	0.00282412	0.828216	0.999176	SEKER
34521	667.908	224.755	195.683	1.14857	0.491905	34830	209.651	0.7858	0.991128	0.972434	0.932796	0.00651068	0.00304056	0.870109	0.99938	SEKER
34523	673.987	231.917	189.734	1.22233	0.575059	34878	209.657	0.785864	0.989822	0.955026	0.904017	0.00671775	0.00276765	0.817247	0.998942	SEKER
34532	689.551	217.022	202.715	1.07058	0.357077	35057	209.684	0.768334	0.985024	0.912639	0.966189	0.00628467	0.00337839	0.933521	0.999407	SEKER
34543	670.896	235.018	187.291	1.25483	0.604082	34826	209.718	0.769195	0.991874	0.964405	0.892347	0.00680364	0.00266107	0.796284	0.999199	SEKER
34543	669.456	226.975	193.973	1.17014	0.519292	34827	209.718	0.786785	0.991845	0.968558	0.923966	0.00657081	0.00295409	0.853714	0.998967	SEKER
34594	670.069	233.441	188.866	1.23601	0.587736	34848	209.872	0.781432	0.992711	0.968215	0.899039	0.00674802	0.00271938	0.808271	0.999034	SEKER
34600	673.252	231.435	190.458	1.21515	0.568123	34919	209.891	0.77779	0.990865	0.959247	0.90691	0.00668887	0.00279119	0.822486	0.999444	SEKER
34601	685.556	226.52	194.719	1.16332	0.510949	35048	209.894	0.78062	0.987246	0.925151	0.926603	0.00654662	0.00297695	0.858593	0.998816	SEKER
34622	683.382	235.929	187.053	1.26129	0.609434	35010	209.957	0.763726	0.988917	0.931612	0.889918	0.00681442	0.00263639	0.791955	0.998887	SEKER
34623	675.213	228.194	193.503	1.17928	0.530035	34965	209.96	0.759576	0.990219	0.954318	0.920095	0.00659083	0.00291373	0.846574	0.998347	SEKER
34626	667.845	231.888	190.468	1.21746	0.570383	34913	209.97	0.761848	0.99178	0.975575	0.905476	0.00669695	0.00277693	0.819888	0.998184	SEKER
34629	670.997	233.131	189.683	1.22906	0.581381	34915	209.979	0.745816	0.991809	0.966515	0.900688	0.00673225	0.00273299	0.81124	0.99706	SEKER
34631	670.02	229.337	192.401	1.19197	0.544213	34953	209.985	0.760686	0.990788	0.969392	0.915617	0.0066223	0.00287107	0.838355	0.999294	SEKER
34635	667.638	227.063	194.415	1.16793	0.516618	34929	209.997	0.764013	0.991583	0.976434	0.924838	0.00655589	0.00295852	0.855326	0.99896	SEKER
34638	677.314	234.69	188.34	1.2461	0.596648	34989	210.006	0.757877	0.989968	0.948817	0.894821	0.00677552	0.00267958	0.800704	0.997758	SEKER
34666	681.015	225.793	195.828	1.15302	0.497803	35034	210.091	0.7978	0.989496	0.939291	0.930459	0.00651338	0.00301144	0.865753	0.998228	SEKER
34671	674.874	235.59	187.65	1.25547	0.604624	35015	210.106	0.76577	0.990176	0.956601	0.89183	0.006795	0.00265154	0.795361	0.998556	SEKER
34676	668.424	226.448	195.194	1.16012	0.506938	34982	210.121	0.777907	0.991253	0.975292	0.927902	0.00653038	0.00298625	0.861002	0.998862	SEKER
34680	669.575	231.262	191.241	1.20927	0.562284	34941	210.133	0.775943	0.99253	0.972054	0.908635	0.00666847	0.00280391	0.825618	0.998396	SEKER
34700	690.412	233.63	189.502	1.23286	0.584881	35154	210.194	0.747877	0.987085	0.914793	0.899686	0.00673286	0.00272109	0.809435	0.997924	SEKER
34703	676.387	230.769	191.763	1.20341	0.556315	35025	210.203	0.77324	0.990807	0.953205	0.910879	0.00664984	0.00282379	0.8297	0.99847	SEKER
34722	670.391	227.259	194.732	1.16704	0.515532	34999	210.26	0.790376	0.992085	0.970864	0.9252	0.00654511	0.00295828	0.855995	0.998978	SEKER
34729	671.193	228.81	193.658	1.18152	0.532599	35043	210.282	0.777144	0.99104	0.96874	0.919022	0.00658845	0.00289912	0.844601	0.997912	SEKER
34733	670.564	228.327	193.86	1.17779	0.528321	35019	210.294	0.777808	0.991833	0.97067	0.921019	0.00657378	0.00291789	0.848276	0.999094	SEKER
34747	672.202	234.54	188.726	1.24276	0.593732	35043	210.336	0.784144	0.991553	0.966335	0.896801	0.00674995	0.00269317	0.804252	0.999489	SEKER
34748	669.267	221.09	200.269	1.10397	0.423654	35046	210.339	0.770466	0.991497	0.974857	0.951371	0.00636268	0.00321529	0.905107	0.999208	SEKER
34750	675.599	223.199	198.528	1.12427	0.456998	35091	210.345	0.805069	0.990282	0.956724	0.942411	0.00642299	0.00312521	0.888139	0.998506	SEKER
34757	686.779	231.23	191.672	1.20638	0.559361	35150	210.366	0.786411	0.988819	0.926015	0.909771	0.00665276	0.00281132	0.827684	0.998504	SEKER
34761	687.872	229.737	192.888	1.19104	0.543203	35171	210.378	0.776817	0.988343	0.923181	0.915736	0.00660905	0.00286681	0.838572	0.998774	SEKER
34766	669.475	232.175	190.994	1.21562	0.568579	35054	210.394	0.752104	0.991784	0.974756	0.906184	0.00667823	0.00277784	0.821169	0.998226	SEKER
34771	683.109	230.587	192.186	1.19981	0.552574	35163	210.409	0.783978	0.988852	0.936369	0.912493	0.00663158	0.00283606	0.832644	0.999016	SEKER
34772	671.947	228.048	194.337	1.17347	0.523256	35103	210.412	0.76318	0.990571	0.967764	0.922665	0.00655837	0.00293192	0.851311	0.998986	SEKER
34774	677.726	228.522	193.96	1.17819	0.52878	35139	210.418	0.780561	0.989613	0.951385	0.920776	0.00657164	0.00291386	0.847828	0.998903	SEKER
34787	677.348	230.857	192.646	1.19835	0.551034	35126	210.457	0.726834	0.990349	0.952803	0.911635	0.00663629	0.00282742	0.831079	0.995921	SEKER
34792	692.19	228.033	194.339	1.17338	0.523151	35231	210.472	0.784929	0.987539	0.912512	0.922992	0.00655417	0.00293419	0.851913	0.999617	SEKER
34794	693.537	237.491	186.993	1.27005	0.616479	35187	210.478	0.747198	0.988831	0.909023	0.88626	0.00682562	0.00259756	0.785456	0.997567	SEKER
34794	671.293	236.611	187.423	1.26244	0.610371	35052	210.478	0.784975	0.99264	0.970264	0.889554	0.00680034	0.00262664	0.791307	0.998979	SEKER
34800	671.796	226.636	195.614	1.15859	0.505002	35120	210.496	0.784632	0.990888	0.968979	0.928785	0.00651253	0.00298945	0.862642	0.999449	SEKER
34841	675.857	231.957	191.611	1.21056	0.563576	35137	210.62	0.789079	0.991576	0.958497	0.908015	0.00665759	0.0027917	0.824491	0.998096	SEKER
34841	670.201	223.722	198.531	1.12689	0.461005	35122	210.62	0.787581	0.991999	0.974743	0.941436	0.00642124	0.00311144	0.886301	0.998765	SEKER
34847	686.633	236.426	188.063	1.25717	0.606034	35229	210.639	0.761018	0.989157	0.928808	0.890927	0.00678469	0.00263681	0.793751	0.997878	SEKER
34850	674.295	230.434	192.752	1.19549	0.548003	35119	210.648	0.772505	0.99234	0.963192	0.914136	0.00661215	0.00284817	0.835644	0.999005	SEKER
34865	680	224.825	197.678	1.13733	0.476359	35256	210.693	0.79318	0.98891	0.947505	0.937141	0.00644845	0.003068	0.878234	0.998844	SEKER
34878	671.541	225.414	197.148	1.14337	0.484835	35188	210.732	0.765204	0.99119	0.971888	0.934869	0.00646291	0.00304517	0.873981	0.999285	SEKER
34878	679.271	229.297	193.95	1.18225	0.533428	35217	210.732	0.78448	0.990374	0.949894	0.919036	0.00657426	0.00289305	0.844627	0.998559	SEKER
34879	689.973	236.193	188.398	1.25369	0.603128	35298	210.735	0.769786	0.98813	0.920682	0.892216	0.00677179	0.00264705	0.796049	0.997999	SEKER
34879	675.467	223.8	198.869	1.12537	0.458682	35258	210.735	0.792362	0.989251	0.960651	0.941623	0.00641647	0.0031116	0.886653	0.997809	SEKER
34882	680.065	234.523	189.531	1.23739	0.58897	35219	210.744	0.792917	0.990431	0.947786	0.898607	0.00672333	0.00270423	0.807495	0.999183	SEKER
34883	672.664	232.322	191.468	1.21337	0.566372	35182	210.747	0.799739	0.991501	0.968785	0.907133	0.00666005	0.00278189	0.82289	0.998471	SEKER
34895	677.7	225.37	197.233	1.14266	0.483848	35227	210.784	0.763032	0.990575	0.954769	0.935278	0.00645851	0.00304843	0.874746	0.999535	SEKER
34911	677.462	235.256	189.28	1.2429	0.593856	35252	210.832	0.762515	0.990327	0.955878	0.896182	0.00673872	0.00268128	0.803142	0.998223	SEKER
34911	670.061	232.395	191.377	1.21433	0.567317	35204	210.832	0.771071	0.991677	0.97711	0.907215	0.00665677	0.00278153	0.823038	0.99944	SEKER
34912	676.03	230.311	193.114	1.19261	0.544911	35245	210.835	0.774377	0.990552	0.959959	0.915437	0.00659689	0.00285781	0.838025	0.999441	SEKER
34924	816.638	258.32	181.64	1.42215	0.711032	37992	210.871	0.712095	0.919246	0.658074	0.816318	0.00739663	0.00202605	0.666375	0.947687	SEKER
34934	687.791	230.159	193.717	1.18812	0.539998	35445	210.901	0.757065	0.985583	0.927994	0.916328	0.0065884	0.00286526	0.839657	0.997613	SEKER
34936	682.571	232.024	192.052	1.20813	0.56113	35353	210.907	0.786847	0.988205	0.942296	0.908991	0.00664139	0.0027969	0.826265	0.998233	SEKER
34945	675.172	234.99	189.554	1.2397	0.591032	35231	210.934	0.760004	0.991882	0.96331	0.897632	0.00672456	0.00269301	0.805743	0.998878	SEKER
34958	672.491	231.262	192.608	1.20069	0.553488	35254	210.974	0.797927	0.991604	0.971367	0.912272	0.00661542	0.0028264	0.83224	0.999259	SEKER
34960	681.462	237.561	187.951	1.26395	0.611597	35342	210.98	0.803493	0.989191	0.946015	0.888107	0.00679523	0.00260763	0.788734	0.996923	SEKER
34968	673.319	238.109	187.138	1.27237	0.618311	35218	211.004	0.755509	0.992901	0.969257	0.886166	0.00680933	0.00259027	0.785291	0.999182	SEKER
34968	750.395	242.822	184.33	1.31733	0.65096	35858	211.004	0.743367	0.97518	0.78037	0.868964	0.00694413	0.00244233	0.755098	0.994711	SEKER
34971	673.194	235.002	189.689	1.23888	0.5903	35269	211.013	0.782454	0.991551	0.9697	0.897921	0.0067199	0.00269461	0.806263	0.998859	SEKER
34980	675.203	233.009	191.343	1.21776	0.570665	35276	211.04	0.785291	0.991609	0.964186	0.905718	0.0066612	0.00276505	0.820325	0.998955	SEKER
34995	679.687	236.991	188.132	1.25971	0.608132	35298	211.085	0.757993	0.991416	0.951914	0.89069	0.00677213	0.00262913	0.793329	0.999362	SEKER
35022	670.696	231.836	192.604	1.2037	0.556609	35293	211.167	0.79178	0.992321	0.978362	0.910845	0.00661973	0.00281059	0.829638	0.998632	SEKER
35031	675.649	232.068	192.537	1.20532	0.558274	35369	211.194	0.798992	0.990444	0.964318	0.910052	0.00662465	0.00280289	0.828194	0.998237	SEKER
35042	676.65	225.615	197.896	1.14007	0.480231	35380	211.227	0.800046	0.990447	0.961769	0.93623	0.0064384	0.00305132	0.876526	0.999298	SEKER
35049	679.396	228.963	195.075	1.17372	0.523552	35349	211.248	0.777484	0.991513	0.9542	0.922629	0.00653266	0.00291997	0.851245	0.999121	SEKER
35059	671.731	230.032	194.322	1.18377	0.535143	35314	211.278	0.777706	0.992779	0.976379	0.918475	0.00656127	0.00288029	0.843596	0.998621	SEKER
35062	701.948	223.264	200.252	1.11491	0.442172	35579	211.287	0.77874	0.985469	0.894204	0.946356	0.00636769	0.0031505	0.89559	0.998505	SEKER
35066	674.509	229.039	195.118	1.17385	0.523708	35356	211.299	0.788709	0.991798	0.968547	0.922547	0.00653166	0.00291848	0.851093	0.999055	SEKER
35069	692.225	234.237	191.214	1.225	0.577589	35563	211.308	0.752683	0.986109	0.919684	0.902115	0.00667931	0.00272872	0.813811	0.996918	SEKER
35081	677.561	234.795	190.579	1.23201	0.584099	35395	211.345	0.768444	0.991129	0.960252	0.900123	0.00669295	0.00271022	0.810221	0.998199	SEKER
35083	687.873	229.65	194.934	1.17809	0.528664	35513	211.351	0.767613	0.987892	0.93173	0.920316	0.0065459	0.00289666	0.846982	0.997822	SEKER
35083	685.515	227.985	196.194	1.16204	0.509352	35477	211.351	0.782701	0.988894	0.938151	0.927038	0.00649844	0.0029606	0.8594	0.998654	SEKER
35085	693.747	245.935	181.856	1.35236	0.673214	35658	211.357	0.735457	0.983931	0.916071	0.8594	0.00700969	0.00235864	0.738569	0.998812	SEKER
35087	678.15	237.294	188.492	1.2589	0.607472	35477	211.363	0.768946	0.989007	0.958748	0.890721	0.00676301	0.00262595	0.793384	0.998795	SEKER
35091	688.22	225.852	197.989	1.14073	0.481167	35466	211.375	0.780251	0.989426	0.931003	0.935898	0.00643619	0.00304595	0.875906	0.999175	SEKER
35091	685.847	232.504	192.627	1.20702	0.560004	35452	211.375	0.762367	0.989817	0.937456	0.909124	0.00662574	0.00279194	0.826506	0.997606	SEKER
35105	687.922	232.376	192.495	1.20718	0.56017	35508	211.417	0.78272	0.98865	0.932181	0.909807	0.00661944	0.00279768	0.827748	0.99924	SEKER
35106	688.658	231.113	193.551	1.19406	0.546473	35503	211.42	0.78743	0.988818	0.930216	0.914791	0.00658328	0.00284387	0.836843	0.999243	SEKER
35106	680.346	234.364	191.011	1.22697	0.579439	35445	211.42	0.810388	0.990436	0.953085	0.9021	0.0066759	0.00272714	0.813784	0.998488	SEKER
35122	679.818	231.796	193.143	1.20013	0.552902	35481	211.468	0.784393	0.989882	0.955001	0.912301	0.00659974	0.00282007	0.832294	0.998857	SEKER
35123	685.227	233.225	192.004	1.21469	0.567668	35457	211.471	0.791915	0.99058	0.94001	0.906726	0.00664023	0.00276864	0.822152	0.998656	SEKER
35128	669.663	228.402	195.967	1.16552	0.513668	35376	211.486	0.785527	0.99299	0.984353	0.925936	0.00650201	0.00294816	0.857358	0.999264	SEKER
35130	678.016	239.183	187.16	1.27796	0.622654	35473	211.492	0.780147	0.990331	0.960303	0.884227	0.00680852	0.00256736	0.781857	0.999182	SEKER
35131	684.17	234.523	190.925	1.22835	0.580729	35466	211.495	0.749989	0.990554	0.943132	0.90181	0.00667567	0.00272354	0.81326	0.998972	SEKER
35134	668.885	226.266	197.956	1.14302	0.484341	35360	211.504	0.797576	0.993609	0.986812	0.934757	0.0064401	0.00303296	0.873771	0.998733	SEKER
35145	681.083	243.765	183.707	1.32692	0.657307	35444	211.537	0.782809	0.991564	0.95208	0.867793	0.00693597	0.00242634	0.753065	0.99926	SEKER
35149	682.373	238.929	187.422	1.27482	0.620222	35509	211.549	0.78255	0.989862	0.948591	0.885406	0.00679761	0.00257695	0.783943	0.999384	SEKER
35162	673.468	230.23	194.642	1.18284	0.534094	35450	211.588	0.786288	0.991876	0.974203	0.91903	0.0065477	0.00288129	0.844616	0.999042	SEKER
35165	676.072	232.883	192.385	1.21051	0.563523	35463	211.597	0.785845	0.991597	0.966795	0.908598	0.00662259	0.00278416	0.82555	0.999334	SEKER
35175	706.545	226.797	197.679	1.1473	0.490197	35707	211.628	0.773553	0.985101	0.885451	0.933113	0.00644768	0.00301523	0.8707	0.998954	SEKER
35176	680.437	235.791	190.024	1.24085	0.592053	35499	211.631	0.795369	0.990901	0.95473	0.897533	0.00670319	0.00268326	0.805566	0.999586	SEKER
35208	678.529	232.286	193.463	1.20067	0.55347	35535	211.727	0.767661	0.990798	0.96098	0.911493	0.00659752	0.00280915	0.83082	0.99754	SEKER
35221	674.683	237.281	189.13	1.25459	0.603884	35484	211.766	0.762756	0.992588	0.972326	0.892469	0.00673692	0.00263641	0.7965	0.999283	SEKER
35223	674.287	231.269	194.316	1.19017	0.542251	35537	211.772	0.766784	0.991164	0.973524	0.915695	0.00656585	0.00284757	0.838497	0.997954	SEKER
35237	676.073	233.928	192.023	1.21823	0.571122	35502	211.814	0.778271	0.992536	0.968772	0.905468	0.00663869	0.00275267	0.819872	0.99879	SEKER
35246	683.282	240.09	186.986	1.28401	0.627256	35599	211.841	0.781283	0.990084	0.94868	0.882339	0.00681185	0.00254675	0.778521	0.999625	SEKER
35247	682.573	234.991	191.235	1.2288	0.581145	35605	211.844	0.759012	0.989945	0.950679	0.9015	0.00666697	0.00271626	0.812702	0.998651	SEKER
35254	687.045	225.064	199.692	1.12705	0.461252	35676	211.865	0.769805	0.988171	0.938529	0.941356	0.00638406	0.00309238	0.886151	0.99874	SEKER
35259	677.828	234.89	191.297	1.22788	0.580286	35577	211.88	0.75224	0.991062	0.964364	0.902041	0.00666183	0.00272069	0.813678	0.999097	SEKER
35272	682.696	232.13	193.598	1.19903	0.551758	35619	211.919	0.779923	0.990258	0.95101	0.912932	0.00658115	0.00281991	0.833445	0.999329	SEKER
35272	682.862	230.081	195.421	1.17736	0.52782	35637	211.919	0.77509	0.989758	0.950548	0.921062	0.00652305	0.00289592	0.848356	0.998822	SEKER
35277	676.858	238.553	188.774	1.26369	0.611387	35527	211.934	0.787556	0.992963	0.967623	0.888417	0.00676227	0.0025986	0.789285	0.997413	SEKER
35283	681.373	223.975	200.837	1.11521	0.442656	35589	211.952	0.779081	0.991402	0.955005	0.94632	0.00634796	0.00314027	0.895522	0.998696	SEKER
35287	677.949	223.621	201.097	1.112	0.437378	35627	211.964	0.789383	0.990457	0.964785	0.947873	0.0063372	0.00315557	0.898463	0.999094	SEKER
35288	676.973	232.621	193.388	1.20288	0.555762	35608	211.967	0.794954	0.991013	0.967596	0.911211	0.00659208	0.00280336	0.830306	0.998755	SEKER
35300	685.599	238.217	188.808	1.26169	0.609759	35640	212.003	0.767225	0.99046	0.943722	0.889958	0.00674836	0.0026113	0.792026	0.999292	SEKER
35302	679.016	235.934	190.741	1.23694	0.588567	35644	212.009	0.781675	0.990405	0.962164	0.898595	0.00668331	0.00268799	0.807473	0.998793	SEKER
35304	686.408	234.616	192.045	1.22167	0.574431	35737	212.015	0.789905	0.987884	0.941606	0.90367	0.00664559	0.00273371	0.816619	0.997638	SEKER
35313	691.229	233.157	193.117	1.20733	0.560326	35743	212.042	0.773899	0.98797	0.928754	0.909441	0.00660257	0.00278606	0.827083	0.998564	SEKER
35316	682.911	237.777	189.242	1.25647	0.605455	35637	212.051	0.760563	0.990993	0.951597	0.891809	0.00673283	0.00262702	0.795323	0.9993	SEKER
35321	682.903	232.944	193.411	1.2044	0.557334	35670	212.066	0.761491	0.990216	0.951754	0.910373	0.00659507	0.00279432	0.828778	0.998181	SEKER
35330	682.682	234.64	192.016	1.22198	0.574726	35655	212.093	0.746871	0.990885	0.952613	0.903911	0.00664137	0.00273489	0.817055	0.998423	SEKER
35337	677.215	228.983	196.633	1.16452	0.51244	35671	212.114	0.765268	0.990637	0.968248	0.926332	0.00647998	0.0029432	0.858091	0.999264	SEKER
35338	680.836	227.467	198.045	1.14857	0.4919	35669	212.117	0.787687	0.99072	0.958003	0.932517	0.00643691	0.00300251	0.869588	0.998778	SEKER
35339	677.909	228.871	196.958	1.16203	0.509344	35667	212.12	0.764649	0.990804	0.966321	0.926811	0.00647645	0.00294769	0.858978	0.998159	SEKER
35344	694.82	234.367	192.352	1.21842	0.571313	35807	212.135	0.762546	0.98707	0.919985	0.905143	0.00663102	0.00274554	0.819284	0.998235	SEKER
35352	684.112	231.523	194.654	1.18941	0.541413	35760	212.159	0.755385	0.988591	0.949226	0.916364	0.00654908	0.0028486	0.839723	0.998771	SEKER
35354	687.741	235.015	191.828	1.22513	0.577717	35726	212.165	0.754364	0.989587	0.939288	0.902772	0.00664749	0.00272364	0.814998	0.998481	SEKER
35354	681.226	237.29	189.89	1.24962	0.599673	35666	212.165	0.768565	0.991252	0.95734	0.894119	0.00671182	0.00264607	0.799449	0.999006	SEKER
35364	683.341	222.295	202.881	1.09569	0.408708	35761	212.195	0.792169	0.988899	0.951692	0.954567	0.00628591	0.00321938	0.911197	0.998392	SEKER
35376	681.424	236.606	190.513	1.24194	0.593019	35693	212.231	0.770702	0.991119	0.957379	0.89698	0.00668833	0.00267073	0.804574	0.999236	SEKER
35377	687.757	237.874	189.492	1.25533	0.604501	35712	212.234	0.781985	0.990619	0.939855	0.892211	0.00672399	0.00262832	0.796041	0.999293	SEKER
35384	679.656	235.758	191.327	1.23223	0.584299	35698	212.255	0.747981	0.991204	0.962584	0.900311	0.00666283	0.00270028	0.81056	0.998794	SEKER
35402	681.514	231.008	195.346	1.18256	0.533782	35696	212.309	0.7759	0.991764	0.957829	0.919054	0.00652529	0.00287173	0.84466	0.998862	SEKER
35403	678.413	233.987	192.879	1.21312	0.566127	35713	212.312	0.770669	0.99132	0.966633	0.90737	0.00660923	0.00276355	0.823319	0.998789	SEKER
35408	684.211	241.923	186.691	1.29585	0.635992	35765	212.327	0.735094	0.990018	0.950454	0.877666	0.00683243	0.00250076	0.770297	0.998188	SEKER
35410	704.701	228.551	197.434	1.15761	0.503746	35997	212.333	0.765953	0.983693	0.896037	0.929043	0.00645441	0.00296605	0.863121	0.999153	SEKER
35412	675.129	228.003	197.943	1.15186	0.496289	35693	212.339	0.795918	0.992127	0.976308	0.931299	0.00643859	0.00298763	0.867317	0.999033	SEKER
35414	680.978	237.138	190.368	1.24568	0.596285	35729	212.345	0.764749	0.991184	0.959663	0.89545	0.00669616	0.00265565	0.801831	0.998827	SEKER
35432	681.365	233.742	193.219	1.20973	0.562743	35757	212.399	0.790646	0.990911	0.95906	0.90869	0.00659692	0.0027745	0.825717	0.998894	SEKER
35437	685.657	228.037	198.233	1.15035	0.494281	35804	212.414	0.781549	0.98975	0.947225	0.931489	0.006435	0.00298841	0.867673	0.998126	SEKER
35438	678.412	233.18	193.711	1.20375	0.55667	35726	212.417	0.793595	0.991939	0.967591	0.910958	0.00657994	0.00279509	0.829844	0.998929	SEKER
35438	677.413	234.43	192.614	1.2171	0.570024	35725	212.417	0.767455	0.991966	0.970447	0.906102	0.00661521	0.00275062	0.821021	0.999261	SEKER
35442	698.883	236.867	191.003	1.24012	0.591409	36046	212.429	0.72959	0.983244	0.911841	0.896827	0.00668324	0.00266687	0.804299	0.997429	SEKER
35442	681.165	228.755	197.587	1.15775	0.503926	35791	212.429	0.791558	0.990249	0.959894	0.928631	0.00645435	0.00296078	0.862356	0.99839	SEKER
35450	680.993	235.796	191.586	1.23076	0.582953	35744	212.453	0.775457	0.991775	0.960596	0.901003	0.00665151	0.002704	0.811807	0.99914	SEKER
35454	677.189	235.532	191.853	1.22767	0.580092	35744	212.465	0.7817	0.991887	0.971528	0.902063	0.00664333	0.00271339	0.813718	0.998977	SEKER
35467	683.515	226.947	199.261	1.13895	0.478651	35845	212.504	0.766721	0.989455	0.953978	0.936358	0.00639883	0.00303423	0.876766	0.998589	SEKER
35473	687.235	241.05	187.645	1.28461	0.627711	35874	212.522	0.791349	0.988822	0.943838	0.881651	0.00679531	0.00253265	0.777308	0.998538	SEKER
35481	679.09	237.902	190.084	1.25156	0.601326	35754	212.546	0.78901	0.992364	0.966832	0.893419	0.00670505	0.00263513	0.798197	0.998991	SEKER
35499	688.485	228.52	197.998	1.15415	0.499284	35887	212.6	0.77165	0.989188	0.941103	0.930335	0.00643736	0.00297471	0.865523	0.998944	SEKER
35507	682.142	239.232	189.116	1.265	0.612446	35835	212.624	0.78192	0.990847	0.958902	0.888775	0.00673761	0.00259331	0.789922	0.999253	SEKER
35510	676.975	227.152	199.323	1.13962	0.479597	35799	212.633	0.771957	0.991927	0.973678	0.936083	0.00639684	0.00302972	0.876252	0.998591	SEKER
35511	702	224.142	204.151	1.09792	0.412821	36641	212.636	0.759074	0.96916	0.905521	0.948665	0.00631191	0.0031535	0.899966	0.988092	SEKER
35517	678.829	232.996	194.233	1.19957	0.552325	35881	212.654	0.771622	0.989855	0.968557	0.912691	0.00656014	0.00280795	0.833006	0.999252	SEKER
35532	676.181	231.107	195.88	1.17984	0.530678	35820	212.699	0.791641	0.99196	0.97657	0.920347	0.00650419	0.00287859	0.847039	0.99937	SEKER
35534	684.316	231.105	196.037	1.17889	0.529583	35921	212.705	0.777617	0.989226	0.953544	0.920379	0.00650378	0.00287881	0.847098	0.998633	SEKER
35539	690.791	247.062	184.042	1.34242	0.667152	35853	212.72	0.826104	0.991242	0.935883	0.860995	0.00695187	0.00235659	0.741313	0.995156	SEKER
35544	683.35	232.235	195.029	1.19077	0.542905	35949	212.735	0.784463	0.988734	0.956511	0.916033	0.00653372	0.00283782	0.839116	0.999193	SEKER
35555	697.407	238.239	190.255	1.25221	0.601877	36021	212.768	0.756087	0.987063	0.918624	0.893086	0.00670057	0.00262945	0.797602	0.998765	SEKER
35565	682.802	227.296	199.384	1.13999	0.480124	35922	212.797	0.801429	0.990062	0.958613	0.936214	0.00639099	0.00302865	0.876497	0.999198	SEKER
35589	687.923	235.064	192.994	1.21798	0.570885	35977	212.869	0.779999	0.989215	0.945031	0.90558	0.00660496	0.00274005	0.820076	0.998838	SEKER
35598	694.499	245.398	185.349	1.32398	0.65538	36045	212.896	0.753636	0.987599	0.927454	0.867556	0.00689358	0.00240888	0.752653	0.996497	SEKER
35602	688.378	240.656	188.59	1.27608	0.6212	35941	212.908	0.780917	0.990568	0.944127	0.8847	0.00675961	0.00255438	0.782695	0.998778	SEKER
35605	694.737	245.554	184.744	1.32916	0.658756	35968	212.917	0.742622	0.989908	0.927001	0.867087	0.00689663	0.00240474	0.75184	0.999314	SEKER
35608	689.304	240.389	188.88	1.27271	0.618577	35997	212.926	0.784144	0.989194	0.94175	0.885755	0.006751	0.00256331	0.784561	0.99852	SEKER
35609	686.971	230.169	197.141	1.16754	0.516141	36002	212.929	0.789329	0.989084	0.948184	0.925097	0.0064638	0.00292023	0.855805	0.999184	SEKER
35610	678.391	234.429	193.826	1.20948	0.562493	35888	212.932	0.756806	0.992254	0.972348	0.908302	0.00658322	0.00276401	0.825013	0.997837	SEKER
35615	692.536	233.004	195.225	1.19352	0.545883	36004	212.947	0.743342	0.989196	0.933164	0.913922	0.00654229	0.00281543	0.835253	0.996887	SEKER
35634	685.864	235.123	193.218	1.21688	0.569814	36006	213.004	0.784285	0.989668	0.951916	0.905925	0.00659828	0.00274144	0.8207	0.998694	SEKER
35647	683.548	233.604	194.407	1.20162	0.554465	35993	213.043	0.771313	0.990387	0.958727	0.911982	0.00655326	0.00279628	0.83171	0.999403	SEKER
35647	679.754	236.157	192.342	1.2278	0.580212	35927	213.043	0.765088	0.992206	0.969459	0.902123	0.00662488	0.00270657	0.813825	0.999214	SEKER
35652	680.437	227.477	199.81	1.13847	0.477975	36002	213.058	0.798978	0.990278	0.967649	0.936612	0.00638048	0.00302881	0.877242	0.998712	SEKER
35672	690.775	241.456	188.251	1.28263	0.626219	36078	213.117	0.779375	0.988747	0.939429	0.882633	0.0067688	0.00253402	0.77904	0.999221	SEKER
35677	689.725	235.974	192.727	1.22439	0.577018	36120	213.132	0.768437	0.987735	0.942424	0.903203	0.00661418	0.00271516	0.815775	0.998829	SEKER
35680	686.068	230.91	197.036	1.17192	0.521414	35991	213.141	0.80402	0.991359	0.952578	0.92305	0.00647169	0.002898	0.852021	0.998496	SEKER
35683	699.955	237.164	192.141	1.23432	0.586208	36188	213.15	0.787496	0.986045	0.915232	0.898746	0.00664642	0.00267494	0.807744	0.997017	SEKER
35684	678.241	237.693	191.412	1.24178	0.592875	35953	213.153	0.768588	0.992518	0.9748	0.89676	0.00666104	0.00265722	0.804179	0.998615	SEKER
35690	699.055	235.795	192.902	1.22236	0.575087	36122	213.171	0.754769	0.988041	0.91777	0.904052	0.00660676	0.00272233	0.81731	0.999044	SEKER
35690	691.225	238.389	190.762	1.24967	0.599717	36059	213.171	0.752573	0.989767	0.93868	0.894214	0.00667944	0.00263443	0.799619	0.999259	SEKER
35693	680.082	229.623	198.089	1.15919	0.505761	35997	213.18	0.779544	0.991555	0.969774	0.928393	0.00643327	0.00294808	0.861913	0.999119	SEKER
35699	694.117	236.665	192.48	1.22956	0.581843	36104	213.198	0.758488	0.988782	0.931109	0.900843	0.00662946	0.00269311	0.811518	0.997808	SEKER
35702	689.386	233.527	194.804	1.19878	0.551492	36067	213.207	0.78397	0.98988	0.944012	0.912985	0.00654101	0.00280337	0.833542	0.999235	SEKER
35703	684.558	235.508	193.075	1.21977	0.572616	36029	213.21	0.765305	0.990952	0.957401	0.90532	0.0065963	0.00273331	0.819604	0.999733	SEKER
35703	677.734	230.114	197.716	1.16386	0.511622	35987	213.21	0.785545	0.992108	0.976778	0.926541	0.00644523	0.00293006	0.858478	0.999148	SEKER
35704	683.565	241.104	188.655	1.27802	0.6227	35994	213.213	0.766312	0.991943	0.960212	0.884318	0.00675287	0.00254743	0.782018	0.999434	SEKER
35720	685.105	236.703	192.342	1.23064	0.582841	36074	213.261	0.775578	0.990187	0.956328	0.900963	0.00662662	0.0026934	0.811734	0.998952	SEKER
35720	685.93	240.812	189.089	1.27354	0.619224	36024	213.261	0.793637	0.991561	0.954029	0.88559	0.00674166	0.00255786	0.784269	0.998796	SEKER
35725	684.673	235.155	193.905	1.21273	0.565741	36053	213.276	0.765727	0.990902	0.95767	0.906956	0.00658238	0.00274731	0.822569	0.997558	SEKER
35730	698.169	242.216	187.991	1.28845	0.630575	36142	213.291	0.786294	0.988601	0.921132	0.880579	0.00677907	0.00251433	0.775419	0.999086	SEKER
35734	700.162	249.47	182.915	1.36386	0.679997	36085	213.302	0.766495	0.990273	0.915998	0.855023	0.0069813	0.00230159	0.731065	0.997067	SEKER
35735	684.121	235.489	193.432	1.21742	0.570343	36043	213.305	0.750231	0.991455	0.959484	0.905797	0.00658987	0.00273641	0.820469	0.998859	SEKER
35736	684.029	235.662	193.378	1.21866	0.571541	36088	213.308	0.752971	0.990246	0.959769	0.905147	0.00659451	0.00273048	0.819292	0.998438	SEKER
35738	684.449	237.85	191.889	1.23952	0.590871	36051	213.314	0.799168	0.991318	0.958645	0.896844	0.00665538	0.00265595	0.804329	0.99698	SEKER
35758	682.303	239.435	190.5	1.25688	0.605795	36049	213.374	0.745891	0.991928	0.965225	0.891155	0.00669599	0.00260501	0.794158	0.998161	SEKER
35762	690.56	236.821	192.708	1.22892	0.58125	36157	213.386	0.79116	0.989075	0.942386	0.901042	0.00662215	0.00269252	0.811876	0.997728	SEKER
35764	674.477	222.123	205.098	1.08301	0.383947	36032	213.392	0.774515	0.992562	0.98792	0.960693	0.0062108	0.00326337	0.922931	0.999541	SEKER
35772	693.316	245.51	185.678	1.32224	0.654231	36140	213.416	0.746416	0.989817	0.93517	0.869275	0.00686319	0.00241732	0.755639	0.999133	SEKER
35777	685.863	221.32	206.193	1.07336	0.363352	36174	213.431	0.79717	0.989025	0.955738	0.964354	0.0061861	0.00330022	0.929979	0.998204	SEKER
35781	688.213	240.178	189.851	1.26509	0.612516	36108	213.443	0.775706	0.990944	0.949329	0.888684	0.00671246	0.00258256	0.789759	0.999116	SEKER
35789	685.127	233.619	195.224	1.19667	0.549256	36146	213.467	0.777076	0.990123	0.958114	0.913739	0.00652767	0.0028069	0.834919	0.99912	SEKER
35795	695.242	249.736	182.704	1.36689	0.681746	36189	213.484	0.791907	0.989113	0.930594	0.85484	0.00697684	0.00229815	0.730751	0.998856	SEKER
35795	684.955	227.565	200.514	1.13491	0.47288	36124	213.484	0.768018	0.990892	0.958756	0.938125	0.00635745	0.00303743	0.880079	0.998811	SEKER
35804	683.756	236.585	192.933	1.22625	0.578769	36096	213.511	0.785348	0.99191	0.962363	0.902473	0.00660777	0.00270378	0.814457	0.998732	SEKER
35809	681.549	232.787	196.048	1.1874	0.539202	36094	213.526	0.76515	0.992104	0.968741	0.917259	0.0065008	0.00283867	0.841365	0.999036	SEKER
35822	691.654	235.405	194.238	1.21194	0.564956	36203	213.565	0.74954	0.989476	0.940983	0.907222	0.00657153	0.002746	0.823052	0.997493	SEKER
35835	687.914	237.704	192.177	1.2369	0.588537	36190	213.604	0.790885	0.990191	0.951588	0.898611	0.0066333	0.00266807	0.807503	0.998803	SEKER
35838	689.511	235.503	193.966	1.21415	0.567139	36193	213.613	0.788931	0.990191	0.947264	0.907048	0.00657133	0.0027438	0.822735	0.998923	SEKER
35838	684.103	241.757	189.108	1.2784	0.622995	36131	213.613	0.78355	0.991891	0.9623	0.883585	0.00674582	0.00253634	0.780722	0.998077	SEKER
35842	679.664	232.111	196.733	1.17982	0.530661	36127	213.625	0.771459	0.992111	0.97502	0.920356	0.00647594	0.0028662	0.847055	0.999376	SEKER
35845	683.888	229.295	199.458	1.14959	0.493275	36169	213.633	0.761364	0.991042	0.963094	0.931696	0.00639686	0.00297333	0.868057	0.997912	SEKER
35853	678.636	230.972	197.895	1.16715	0.515664	36172	213.657	0.791282	0.991181	0.978276	0.925035	0.0064422	0.00290969	0.85569	0.998715	SEKER
35864	681.39	231.339	197.814	1.16948	0.518495	36158	213.69	0.787009	0.991869	0.970682	0.923709	0.00645046	0.00289675	0.853237	0.997845	SEKER
35872	684.086	232.552	196.592	1.18292	0.534186	36214	213.714	0.769785	0.990556	0.963261	0.918994	0.00648283	0.0028523	0.84455	0.999034	SEKER
35901	686.097	236.851	193.255	1.22559	0.578145	36225	213.8	0.765594	0.991056	0.958397	0.902678	0.00659734	0.00270197	0.814827	0.998644	SEKER
35901	684.781	238.026	192.274	1.23795	0.589478	36216	213.8	0.778341	0.991302	0.962084	0.898221	0.00663008	0.00266214	0.806801	0.998782	SEKER
35915	685.086	238.637	191.837	1.24395	0.594781	36222	213.842	0.79939	0.991524	0.961602	0.896097	0.0066445	0.00264279	0.80299	0.998883	SEKER
35923	684.665	229.982	199.115	1.15502	0.500412	36239	213.866	0.771012	0.99128	0.963	0.929925	0.00640208	0.00295319	0.86476	0.998814	SEKER
35932	688.727	242.496	188.791	1.28447	0.627604	36273	213.893	0.74278	0.990599	0.951913	0.882045	0.00674875	0.0025198	0.778003	0.999321	SEKER
35954	710.093	251.661	182.015	1.38264	0.690581	36380	213.958	0.794564	0.98829	0.896038	0.850184	0.00699952	0.0022558	0.722814	0.99939	SEKER
35955	683.377	242.604	188.874	1.28448	0.627613	36232	213.961	0.743625	0.992355	0.967494	0.881934	0.00674744	0.00251805	0.777808	0.999078	SEKER
35955	693.613	253.664	180.884	1.40236	0.701079	36295	213.961	0.776583	0.990632	0.939149	0.843482	0.00705504	0.00220284	0.711462	0.997725	SEKER
35967	684.169	231.493	197.953	1.16944	0.518445	36223	213.997	0.786215	0.992933	0.965578	0.924419	0.00643627	0.00289927	0.85455	0.999344	SEKER
35969	704.8	222.254	206.815	1.07465	0.366211	36555	214.003	0.811795	0.983969	0.909927	0.962874	0.00617905	0.00327626	0.927126	0.99634	SEKER
35972	685.989	233.493	196.292	1.18952	0.541537	36336	214.012	0.76157	0.989982	0.960595	0.916566	0.00649096	0.00282581	0.840092	0.999304	SEKER
35975	685.086	235.364	194.903	1.2076	0.560594	36307	214.021	0.767614	0.990856	0.963209	0.909318	0.00654243	0.00275919	0.826859	0.998512	SEKER
35977	702.354	247.184	185.501	1.33252	0.660917	36371	214.026	0.757092	0.989167	0.916479	0.865859	0.00687061	0.00238212	0.749712	0.999005	SEKER
35978	687.586	243.53	188.415	1.29252	0.633574	36297	214.029	0.746927	0.991211	0.956297	0.878862	0.00676887	0.00249103	0.772398	0.998341	SEKER
35996	686.723	235.343	194.807	1.20809	0.561091	36312	214.083	0.779134	0.991298	0.959182	0.909662	0.00653805	0.00276152	0.827485	0.999674	SEKER
36000	691.429	221.698	207.235	1.06979	0.355277	36450	214.095	0.779406	0.987654	0.946275	0.965705	0.00615828	0.00330383	0.932587	0.997674	SEKER
36006	693.059	229.383	199.927	1.14734	0.490247	36489	214.113	0.772329	0.986763	0.941986	0.933427	0.0063707	0.00298325	0.871287	0.99966	SEKER
36013	692.489	251.219	182.693	1.37509	0.6864	36327	214.134	0.776678	0.991356	0.943721	0.852377	0.0069758	0.00227143	0.726546	0.999068	SEKER
36022	683.433	240.355	191.074	1.25791	0.606653	36323	214.16	0.792424	0.991713	0.969138	0.891016	0.00667246	0.00259422	0.793909	0.99867	SEKER
36029	688.635	238.661	192.575	1.23931	0.590688	36371	214.181	0.774951	0.990597	0.954737	0.89743	0.00662412	0.00265039	0.805381	0.998117	SEKER
36032	741.973	238.768	192.477	1.2405	0.591747	36713	214.19	0.771745	0.981451	0.822474	0.897063	0.00662656	0.00264703	0.804721	0.99826	SEKER
36036	681.481	236.172	194.55	1.21394	0.566932	36286	214.202	0.780659	0.99311	0.975077	0.906975	0.00655378	0.0027356	0.822603	0.99859	SEKER
36044	691.115	233.58	196.668	1.18769	0.539521	36384	214.226	0.789538	0.990655	0.948292	0.91714	0.00648042	0.0028283	0.841145	0.999018	SEKER
36059	692.057	237.053	193.859	1.22281	0.575521	36417	214.27	0.79167	0.990169	0.946106	0.903891	0.00657404	0.00270692	0.817019	0.99906	SEKER
36075	702.685	238.166	193.081	1.2335	0.585463	36522	214.318	0.755814	0.987761	0.91811	0.899867	0.00660197	0.00267034	0.809761	0.998843	SEKER
36076	693.745	243.526	189.197	1.28716	0.629615	36427	214.321	0.759127	0.990364	0.941951	0.880073	0.00675037	0.00249794	0.774528	0.996938	SEKER
36082	683.764	234.153	196.332	1.19264	0.544941	36409	214.339	0.786083	0.991019	0.969813	0.915376	0.00648948	0.00281053	0.837914	0.999332	SEKER
36085	689.809	237.31	193.835	1.22429	0.576921	36414	214.347	0.755928	0.990965	0.952969	0.903237	0.00657643	0.00270008	0.815837	0.998821	SEKER
36092	690.636	236.301	194.681	1.21378	0.56678	36433	214.368	0.769667	0.99064	0.950873	0.907183	0.00654718	0.00273536	0.822981	0.998923	SEKER
36100	681.59	236.752	194.344	1.21821	0.571105	36350	214.392	0.769953	0.993122	0.976496	0.905556	0.00655822	0.00272036	0.820032	0.99897	SEKER
36104	698.492	247.968	185.622	1.33588	0.663054	36456	214.404	0.755946	0.990345	0.929913	0.864643	0.00686817	0.00236792	0.747607	0.998712	SEKER
36105	712.899	247.771	185.705	1.33422	0.662004	36668	214.407	0.742779	0.984646	0.892732	0.865342	0.00686252	0.00237364	0.748817	0.999088	SEKER
36109	690.918	236.918	194.404	1.21869	0.571572	36461	214.419	0.77156	0.990346	0.950544	0.905032	0.0065612	0.00271531	0.819083	0.99821	SEKER
36109	708.201	234.773	196.363	1.19561	0.548131	36550	214.419	0.768866	0.987934	0.904716	0.913301	0.0065018	0.00279041	0.834119	0.997281	SEKER
36112	723.077	225.329	204.666	1.10096	0.418317	36709	214.428	0.792243	0.983737	0.867945	0.951621	0.00623972	0.00315647	0.905583	0.997008	SEKER
36115	688.089	228.014	201.846	1.12964	0.465143	36464	214.437	0.784154	0.990429	0.958536	0.940453	0.00631356	0.00304651	0.884452	0.999115	SEKER
36120	683.177	229.66	200.47	1.14561	0.487902	36437	214.451	0.76354	0.9913	0.972503	0.933779	0.00635824	0.00298191	0.871944	0.998906	SEKER
36120	682.617	225.738	203.98	1.10667	0.428351	36472	214.451	0.760821	0.990349	0.9741	0.950002	0.00624967	0.00314003	0.902503	0.998772	SEKER
36128	690.354	241.897	190.49	1.26987	0.616335	36465	214.475	0.776729	0.990758	0.952599	0.886638	0.00669556	0.00255241	0.786126	0.998276	SEKER
36136	711.044	234.639	196.278	1.19544	0.547954	36663	214.499	0.775584	0.985626	0.898167	0.914164	0.00649323	0.00279729	0.835697	0.999029	SEKER
36137	703.387	240.494	191.503	1.25582	0.604916	36540	214.502	0.781239	0.988971	0.917853	0.891923	0.00665505	0.00259801	0.795527	0.999043	SEKER
36140	693.003	236.506	194.838	1.21386	0.566856	36473	214.511	0.764382	0.99087	0.945644	0.906999	0.00654416	0.00273188	0.822647	0.99858	SEKER
36144	690.759	222.62	206.92	1.07588	0.368884	36563	214.523	0.783287	0.98854	0.951904	0.963626	0.00615926	0.00327599	0.928575	0.999031	SEKER
36147	710.044	241.696	190.868	1.2663	0.613488	36675	214.532	0.786146	0.985603	0.900973	0.887609	0.00668648	0.00256014	0.78785	0.997652	SEKER
36152	694.2	248.935	185.049	1.34524	0.66889	36582	214.546	0.761576	0.988246	0.942699	0.861855	0.0068858	0.00234354	0.742795	0.999238	SEKER
36154	679.696	234.968	196.136	1.19799	0.550653	36386	214.552	0.784286	0.993624	0.983415	0.913113	0.00649909	0.00278695	0.833775	0.99885	SEKER
36154	691.479	232.057	198.68	1.16799	0.516697	36497	214.552	0.779181	0.990602	0.950185	0.924566	0.00641858	0.00289315	0.854823	0.998428	SEKER
36156	687.239	238.868	193.076	1.23717	0.588775	36461	214.558	0.762737	0.991635	0.961999	0.89823	0.00660659	0.00265282	0.806818	0.99817	SEKER
36156	683.782	238.98	192.875	1.23904	0.590447	36404	214.558	0.780401	0.993188	0.971751	0.897809	0.00660969	0.00264909	0.806061	0.998742	SEKER
36166	684.301	238.569	193.283	1.2343	0.586187	36460	214.588	0.787347	0.991936	0.970546	0.899479	0.00659651	0.00266353	0.809062	0.998625	SEKER
36166	693.373	226.83	203.392	1.11523	0.442694	36553	214.588	0.775429	0.989413	0.945315	0.94603	0.00627191	0.00309884	0.894973	0.998104	SEKER
36169	685.632	238.457	193.314	1.23352	0.585479	36452	214.597	0.791513	0.992236	0.966861	0.899941	0.00659284	0.00266753	0.809894	0.999021	SEKER
36186	685.681	236.999	194.915	1.21591	0.568867	36484	214.647	0.796434	0.991832	0.967178	0.905687	0.00654947	0.00271831	0.82027	0.997374	SEKER
36210	690.479	236.32	195.218	1.21055	0.563563	36567	214.718	0.761338	0.990237	0.954415	0.908591	0.00652638	0.00274363	0.825538	0.999352	SEKER
36236	714.592	234.894	196.581	1.19489	0.547362	36704	214.796	0.776098	0.987249	0.891731	0.914438	0.00648232	0.00279594	0.836196	0.999164	SEKER
36244	701.396	237.532	194.532	1.22105	0.573836	36667	214.819	0.745485	0.988464	0.925805	0.904379	0.0065537	0.00270438	0.817901	0.998695	SEKER
36246	684.492	238.566	193.571	1.23245	0.5845	36557	214.825	0.78746	0.991493	0.97215	0.900484	0.00658187	0.00266951	0.810871	0.999356	SEKER
36253	698.598	230.525	200.531	1.14957	0.493251	36730	214.846	0.788143	0.987013	0.933467	0.931986	0.00635878	0.00295931	0.868597	0.998517	SEKER
36253	681.763	237.312	194.781	1.21835	0.571243	36493	214.846	0.782157	0.993423	0.980137	0.905331	0.006546	0.00271259	0.819624	0.998591	SEKER
36257	690.403	221.793	208.315	1.0647	0.343278	36639	214.858	0.788744	0.989574	0.955865	0.968733	0.00611723	0.00332316	0.938444	0.999159	SEKER
36261	701.08	232.459	198.93	1.16855	0.517368	36685	214.87	0.766634	0.988442	0.927074	0.924334	0.00641071	0.0028867	0.854393	0.9984	SEKER
36265	684.137	240.947	191.895	1.25562	0.604745	36514	214.881	0.749835	0.993181	0.973669	0.891819	0.00664407	0.00259252	0.795341	0.998647	SEKER
36272	724.509	242.872	190.579	1.27439	0.619886	36736	214.902	0.780647	0.987369	0.868348	0.884839	0.00669584	0.00253187	0.782939	0.997767	SEKER
36278	689.943	246.548	187.749	1.31318	0.648152	36580	214.92	0.746154	0.991744	0.957694	0.871715	0.00679608	0.00242068	0.759887	0.997868	SEKER
36299	693.838	243.741	189.801	1.28419	0.627396	36649	214.982	0.73834	0.99045	0.94752	0.882009	0.00671482	0.00250672	0.77794	0.999024	SEKER
36301	713.642	231.513	200.11	1.15693	0.502876	36793	214.988	0.767983	0.986628	0.89571	0.928623	0.00637759	0.00292546	0.86234	0.997665	SEKER
36311	689.155	240.151	192.62	1.24676	0.597221	36606	215.018	0.783139	0.991941	0.960759	0.895343	0.00661373	0.00262171	0.801639	0.999454	SEKER
36325	690.58	246.17	188.31	1.30726	0.644078	36623	215.059	0.738869	0.991863	0.957167	0.87362	0.00677688	0.002435	0.763211	0.997714	SEKER
36331	692.777	235.048	196.991	1.1932	0.545539	36684	215.077	0.78384	0.990377	0.951262	0.915032	0.00646964	0.00279772	0.837284	0.999043	SEKER
36336	685.99	238.136	194.478	1.22449	0.577107	36612	215.092	0.764003	0.992461	0.970312	0.903232	0.00655371	0.00269069	0.815827	0.998971	SEKER
36340	683.845	235.806	196.762	1.19843	0.551124	36609	215.104	0.803271	0.992652	0.976516	0.912205	0.00648889	0.00277153	0.832118	0.997237	SEKER
36343	697.705	243.41	190.963	1.27464	0.620086	36737	215.112	0.786271	0.989275	0.938182	0.883746	0.00669757	0.00252003	0.781006	0.995504	SEKER
36345	682.374	230.786	200.742	1.14967	0.493377	36613	215.118	0.784142	0.99268	0.980866	0.93211	0.00634988	0.00295674	0.868828	0.998865	SEKER
36349	686.851	226.52	204.817	1.10596	0.427131	36645	215.13	0.740879	0.991922	0.968227	0.949719	0.0062318	0.00312733	0.901966	0.997541	SEKER
36361	685.038	234.791	197.42	1.1893	0.541293	36669	215.166	0.789427	0.991601	0.97368	0.916415	0.00645721	0.00280927	0.839816	0.998789	SEKER
36365	690.321	239.141	193.835	1.23374	0.585675	36680	215.177	0.784303	0.991412	0.95894	0.899794	0.00657613	0.00265902	0.809629	0.998869	SEKER
36369	689.67	236.846	195.647	1.21057	0.563591	36716	215.189	0.768446	0.990549	0.960857	0.908564	0.00651229	0.00273738	0.825488	0.999315	SEKER
36373	689.957	244.479	189.702	1.28876	0.630806	36684	215.201	0.783901	0.991522	0.960163	0.880243	0.00672145	0.00248916	0.774827	0.998565	SEKER
36384	689.513	239.47	193.654	1.23659	0.588254	36749	215.234	0.755199	0.990068	0.961691	0.898793	0.00658173	0.00264947	0.807829	0.998952	SEKER
36393	681.994	233.831	198.332	1.17899	0.529705	36655	215.26	0.782864	0.992852	0.983256	0.920579	0.00642517	0.00284649	0.847466	0.999156	SEKER
36396	689.842	231.767	200.314	1.15702	0.50299	36785	215.269	0.798666	0.989425	0.96109	0.928817	0.00636793	0.00292347	0.862701	0.998159	SEKER
36405	691.958	236.522	196.262	1.20513	0.558085	36738	215.296	0.794869	0.990936	0.955458	0.910258	0.00649696	0.00275137	0.82857	0.998538	SEKER
36411	696.862	237.172	195.641	1.21228	0.565292	36825	215.314	0.770375	0.988758	0.942213	0.907836	0.00651375	0.00272924	0.824167	0.999122	SEKER
36421	687.46	238.699	194.43	1.22769	0.580109	36706	215.343	0.790369	0.992236	0.968427	0.902152	0.00655389	0.00267792	0.813878	0.999189	SEKER
36421	692.256	238.703	194.449	1.22759	0.580018	36776	215.343	0.794785	0.990347	0.955055	0.902137	0.00655401	0.00267779	0.81385	0.999075	SEKER
36426	696.301	242.005	191.826	1.26159	0.609673	36779	215.358	0.742539	0.990402	0.94412	0.88989	0.00664375	0.00257003	0.791904	0.999055	SEKER
36439	689.312	237.311	195.707	1.21258	0.565593	36736	215.396	0.799276	0.991915	0.963706	0.907654	0.00651256	0.00272654	0.823835	0.99897	SEKER
36443	703.908	229.651	202.378	1.13476	0.472668	36837	215.408	0.767625	0.989304	0.924256	0.937979	0.00630166	0.00300889	0.879804	0.99837	SEKER
36453	687.95	239.779	193.705	1.23785	0.589389	36717	215.438	0.758332	0.99281	0.967898	0.898486	0.00657775	0.00264424	0.807276	0.999291	SEKER
36461	694.029	242.561	192.009	1.26328	0.611052	36805	215.461	0.758987	0.990653	0.951225	0.888276	0.00665262	0.00255485	0.789035	0.996772	SEKER
36461	695.283	239.63	194.021	1.23507	0.586887	36845	215.461	0.775848	0.989578	0.947797	0.899142	0.00657222	0.00264975	0.808457	0.998503	SEKER
36463	695.433	239.705	193.909	1.23617	0.587876	36818	215.467	0.785671	0.990358	0.94744	0.898886	0.00657391	0.00264742	0.807997	0.99882	SEKER
36469	692.125	240.759	193.116	1.24671	0.597171	36766	215.485	0.76556	0.991922	0.956675	0.895025	0.00660174	0.00261323	0.801069	0.998697	SEKER
36473	690.992	232.637	199.75	1.16464	0.51259	36858	215.497	0.785531	0.989555	0.959921	0.926323	0.00637833	0.00289692	0.858075	0.999349	SEKER
36474	690.09	233.845	198.809	1.17623	0.526501	36817	215.5	0.771512	0.990684	0.962458	0.921551	0.00641127	0.00285234	0.849256	0.99892	SEKER
36481	689.428	230.618	201.736	1.14317	0.484557	36781	215.52	0.781345	0.991844	0.964492	0.934533	0.0063216	0.00297431	0.873352	0.998391	SEKER
36496	698.972	218.337	213.039	1.02487	0.218951	36927	215.565	0.771488	0.988328	0.938719	0.987303	0.00598249	0.00350642	0.974767	0.999007	SEKER
36518	691.304	232.865	199.746	1.16581	0.514025	36855	215.63	0.800833	0.990856	0.960238	0.925984	0.00637673	0.00289196	0.857446	0.999617	SEKER
36520	692.007	233.332	199.582	1.1691	0.518041	36852	215.636	0.796893	0.990991	0.95834	0.924158	0.00638915	0.00287481	0.854069	0.998495	SEKER
36527	691.877	238.314	195.399	1.21963	0.572478	36865	215.656	0.765284	0.990831	0.958884	0.904923	0.00652433	0.00269875	0.818886	0.998739	SEKER
36532	697.29	243.797	191.494	1.27313	0.618907	36893	215.671	0.812147	0.990215	0.944184	0.884635	0.00667351	0.0025211	0.782579	0.996327	SEKER
36536	687.345	231.542	201.212	1.15074	0.494797	36879	215.683	0.784775	0.990699	0.97181	0.931507	0.00633736	0.00294329	0.867706	0.998501	SEKER
36540	710.343	239.115	195.1	1.2256	0.578156	37058	215.695	0.751635	0.986022	0.910002	0.902054	0.00654392	0.00267269	0.813702	0.997274	SEKER
36549	694.092	239.784	194.256	1.23437	0.586252	36884	215.721	0.775592	0.990917	0.953348	0.899646	0.00656063	0.00265102	0.809363	0.999055	SEKER
36553	691.653	231.251	201.455	1.1479	0.491006	36884	215.733	0.777591	0.991026	0.960188	0.932897	0.00632645	0.0029558	0.870297	0.999014	SEKER
36554	698.178	247.485	188.257	1.31461	0.649123	36868	215.736	0.789981	0.991483	0.94235	0.871715	0.00677038	0.00241152	0.759887	0.998953	SEKER
36565	691.737	242.284	192.328	1.25974	0.608159	36892	215.768	0.752057	0.991136	0.96027	0.890561	0.00662611	0.00257094	0.793099	0.999097	SEKER
36566	694.803	245.209	190.103	1.28988	0.631632	36883	215.771	0.778596	0.991405	0.95184	0.879948	0.00670593	0.00248009	0.774309	0.998762	SEKER
36568	691.529	241.392	193.119	1.24996	0.599969	36883	215.777	0.789669	0.991459	0.960927	0.893887	0.00660119	0.00259975	0.799033	0.998763	SEKER
36576	687.61	230.156	202.503	1.13656	0.475249	36883	215.801	0.781038	0.991676	0.972124	0.937627	0.00629255	0.00300004	0.879145	0.999197	SEKER
36587	705.861	248.487	187.75	1.3235	0.655065	36985	215.833	0.751705	0.989239	0.92278	0.868591	0.00679167	0.00238461	0.75445	0.998514	SEKER
36589	698.326	241.372	193.298	1.2487	0.598892	37011	215.839	0.779352	0.988598	0.942853	0.894216	0.00659686	0.00260188	0.799623	0.998493	SEKER
36592	698.499	239.812	194.399	1.23361	0.58556	36953	215.848	0.779084	0.990231	0.942463	0.900071	0.00655368	0.00265322	0.810128	0.999382	SEKER
36594	688.123	235.726	197.841	1.19149	0.543696	36890	215.854	0.763138	0.991976	0.971153	0.915698	0.00644166	0.00279375	0.838503	0.999072	SEKER
36598	691.778	242.299	192.637	1.2578	0.606557	36971	215.866	0.77479	0.989911	0.961023	0.890907	0.00662055	0.00257278	0.793715	0.998334	SEKER
36600	693.853	240.855	193.635	1.24386	0.594698	36908	215.872	0.770283	0.991655	0.955336	0.896273	0.00658073	0.00261948	0.803306	0.999199	SEKER
36601	692.969	247.362	188.591	1.31164	0.647098	36924	215.875	0.78722	0.991252	0.957801	0.872706	0.00675835	0.0024182	0.761616	0.998964	SEKER
36606	700.229	246.887	188.891	1.30703	0.643921	36991	215.889	0.780013	0.989592	0.938171	0.874445	0.00674445	0.00243252	0.764655	0.999428	SEKER
36609	688.123	224.373	207.982	1.07881	0.375186	36943	215.898	0.764088	0.990959	0.971551	0.962231	0.00612889	0.003241	0.925888	0.998855	SEKER
36613	697.658	233.05	200.354	1.16319	0.510797	36993	215.91	0.75703	0.989728	0.945279	0.926453	0.00636523	0.00289259	0.858315	0.998387	SEKER
36620	688.188	236.196	197.715	1.19463	0.547082	36899	215.931	0.788697	0.992439	0.971659	0.914202	0.00644991	0.00277908	0.835764	0.998429	SEKER
36629	686.542	231.346	201.706	1.14695	0.489718	36913	215.957	0.784078	0.992306	0.976564	0.933479	0.00631594	0.00295826	0.871384	0.99943	SEKER
36648	728.404	244.722	191.125	1.28042	0.624543	37297	216.013	0.760332	0.982599	0.867992	0.882689	0.00667763	0.00250053	0.77914	0.99763	SEKER
36655	697.963	241.023	193.954	1.24268	0.593667	37023	216.034	0.7788	0.99006	0.945536	0.896321	0.00657544	0.00261793	0.803391	0.99836	SEKER
36661	689.743	229.36	203.776	1.12555	0.458961	36979	216.051	0.7852	0.991401	0.968366	0.941975	0.00625624	0.00303844	0.887317	0.998718	SEKER
36663	698.145	234.708	199.093	1.17889	0.529583	37092	216.057	0.772259	0.988434	0.94525	0.920536	0.00640177	0.00283559	0.847387	0.998973	SEKER
36677	690.331	239.381	195.211	1.22627	0.578784	36981	216.099	0.777665	0.99178	0.967139	0.902737	0.00652675	0.00267376	0.814935	0.999331	SEKER
36677	687.082	236.078	198.132	1.19152	0.543723	36958	216.099	0.777665	0.992397	0.976307	0.915371	0.00643667	0.00278759	0.837903	0.998378	SEKER
36701	719.886	234.416	200.837	1.1672	0.515724	37415	216.169	0.760201	0.980917	0.889939	0.922162	0.00638718	0.00284916	0.850382	0.992562	SEKER
36705	698.444	247.005	189.463	1.30371	0.641596	37077	216.181	0.771762	0.989967	0.945523	0.87521	0.00672946	0.00243562	0.765993	0.998632	SEKER
36707	697.665	244.379	191.501	1.27612	0.621237	37074	216.187	0.786202	0.990101	0.947687	0.884639	0.00665755	0.00251512	0.782586	0.998677	SEKER
36711	701.528	244.558	191.297	1.27842	0.62301	37042	216.199	0.755153	0.991064	0.937381	0.884039	0.00666171	0.00250987	0.781525	0.99912	SEKER
36730	692.349	235.968	198.496	1.18878	0.540725	37038	216.255	0.766678	0.991684	0.962899	0.916457	0.0064244	0.00279551	0.839894	0.998448	SEKER
36733	696.714	235.208	199.111	1.18129	0.532341	37081	216.264	0.770536	0.990615	0.950949	0.919455	0.00640319	0.00282292	0.845397	0.998662	SEKER
36736	695.806	248.186	188.703	1.31522	0.649537	37023	216.272	0.750787	0.992248	0.95351	0.871414	0.00675592	0.00240305	0.759362	0.998727	SEKER
36738	690.192	237.933	197.058	1.20742	0.560418	37032	216.278	0.746662	0.992061	0.969138	0.908989	0.00647648	0.00272742	0.82626	0.997645	SEKER
36740	708.732	239.511	195.93	1.22243	0.575162	37128	216.284	0.753548	0.98955	0.919147	0.903022	0.00651909	0.00267399	0.815449	0.996833	SEKER
36741	692.928	238.615	196.465	1.21454	0.567528	37052	216.287	0.752643	0.991606	0.961578	0.906425	0.00649453	0.0027043	0.821607	0.997878	SEKER
36746	701.775	243.971	191.985	1.27078	0.617059	37125	216.302	0.759231	0.989791	0.937614	0.886588	0.00663939	0.00253043	0.786038	0.998883	SEKER
36768	699.477	244.347	191.698	1.27465	0.620091	37178	216.367	0.781732	0.988972	0.94435	0.885489	0.00664564	0.00252028	0.78409	0.99944	SEKER
36775	691.274	244.739	191.48	1.27814	0.622796	37039	216.387	0.75518	0.992872	0.967079	0.884155	0.00665503	0.00250867	0.78173	0.999164	SEKER
36778	686.751	231.398	202.785	1.1411	0.481681	37050	216.396	0.754266	0.992659	0.97994	0.935166	0.00629176	0.00296829	0.874535	0.997933	SEKER
36789	687.353	237.489	197.369	1.20327	0.556171	37058	216.428	0.787942	0.992741	0.978517	0.91132	0.00645543	0.00274656	0.830504	0.999322	SEKER
36791	699.632	245.282	191.521	1.28071	0.624759	37159	216.434	0.79134	0.990097	0.944522	0.882389	0.0066669	0.00249313	0.778611	0.997174	SEKER
36805	699.998	236.574	198.474	1.19197	0.54421	37153	216.475	0.7771	0.990633	0.943894	0.915041	0.00642778	0.00277973	0.8373	0.998035	SEKER
36806	692.839	243.313	192.899	1.26135	0.60948	37082	216.478	0.756625	0.992557	0.963527	0.889712	0.00661069	0.00255519	0.791587	0.998468	SEKER
36813	691.769	243.007	193.326	1.25699	0.605882	37100	216.499	0.778304	0.992264	0.966694	0.890915	0.00660113	0.00256532	0.793729	0.997705	SEKER
36824	689.547	236.361	198.577	1.19027	0.542366	37125	216.531	0.767199	0.991892	0.973225	0.916102	0.00641868	0.0027887	0.839243	0.99893	SEKER
36831	692.49	240.352	195.327	1.23051	0.582725	37129	216.552	0.782257	0.991974	0.965153	0.900977	0.00652581	0.00265258	0.811759	0.99888	SEKER
36839	693.645	239.666	195.873	1.22358	0.576251	37173	216.575	0.793773	0.991015	0.962151	0.903654	0.00650577	0.00267601	0.816591	0.999166	SEKER
36841	689.544	238.388	197.083	1.20959	0.5626	37129	216.581	0.797165	0.992243	0.973682	0.908522	0.00647074	0.00271942	0.825412	0.998407	SEKER
36847	691.017	235.621	199.311	1.18218	0.533345	37168	216.599	0.765096	0.991364	0.969694	0.919269	0.00639457	0.00281684	0.845055	0.999004	SEKER
36851	699.211	240.537	195.537	1.23014	0.582381	37198	216.611	0.768931	0.990672	0.947202	0.900529	0.00652729	0.00264791	0.810952	0.997584	SEKER
36856	693.273	239.927	195.734	1.22578	0.578326	37126	216.625	0.790816	0.992727	0.963628	0.902878	0.00650986	0.00266851	0.815189	0.999244	SEKER
36860	704.322	238.889	196.71	1.21442	0.567406	37289	216.637	0.78037	0.988495	0.933733	0.906854	0.00648097	0.00270376	0.822383	0.998719	SEKER
36863	690.538	236.754	198.359	1.19357	0.545938	37161	216.646	0.768459	0.991981	0.971461	0.915067	0.00642254	0.00277778	0.837347	0.999428	SEKER
36864	698.915	248.778	188.826	1.3175	0.651074	37195	216.649	0.746628	0.991101	0.948339	0.870852	0.00674854	0.00239423	0.758382	0.999167	SEKER
36870	692.977	245.228	191.529	1.28037	0.624504	37138	216.666	0.755146	0.992784	0.964818	0.883529	0.00665117	0.00250012	0.780623	0.99949	SEKER
36872	692.414	237.206	198.193	1.19685	0.549445	37183	216.672	0.784511	0.991636	0.96644	0.913435	0.00643323	0.00276261	0.834363	0.998604	SEKER
36880	694.705	239.583	196.275	1.22065	0.573457	37219	216.696	0.776094	0.990892	0.960285	0.904472	0.00649628	0.00268179	0.818069	0.998576	SEKER
36883	696.855	237.687	197.717	1.20215	0.555015	37217	216.705	0.779669	0.991026	0.954446	0.911724	0.00644434	0.00274671	0.831241	0.999279	SEKER
36888	697.864	249.445	188.603	1.32259	0.654467	37205	216.719	0.777588	0.99148	0.951817	0.868806	0.00676222	0.00237663	0.754824	0.998325	SEKER
36892	697.906	243.861	192.902	1.26417	0.611772	37200	216.731	0.765331	0.99172	0.951805	0.888749	0.00661012	0.00254394	0.789876	0.998536	SEKER
36898	695.299	239.859	196.369	1.22148	0.574247	37250	216.749	0.775804	0.99055	0.959112	0.903649	0.00650061	0.00267382	0.816581	0.997434	SEKER
36906	702.412	246.368	190.949	1.29023	0.631895	37298	216.772	0.779232	0.98949	0.939989	0.879871	0.00667556	0.00246799	0.774173	0.998863	SEKER
36911	690.768	229.519	204.915	1.12007	0.45045	37249	216.787	0.77709	0.990926	0.972078	0.944528	0.00621816	0.00305283	0.892134	0.999252	SEKER
36917	700.833	236.925	198.777	1.19192	0.544155	37353	216.804	0.771709	0.988328	0.944511	0.915075	0.00641779	0.00277582	0.837362	0.998066	SEKER
36919	706.713	248.884	189.008	1.31679	0.650597	37346	216.81	0.770462	0.988566	0.92891	0.87113	0.00674135	0.00239474	0.758868	0.999268	SEKER
36934	697.608	244.054	192.904	1.26516	0.612571	37227	216.854	0.775403	0.992129	0.953703	0.888552	0.00660783	0.0025408	0.789525	0.998874	SEKER
36939	695.361	241.644	195.297	1.23731	0.588904	37283	216.869	0.730337	0.990773	0.960007	0.897475	0.00654169	0.00261794	0.805461	0.996608	SEKER
36952	696.83	242.22	194.414	1.2459	0.596474	37282	216.907	0.786296	0.991149	0.9563	0.895497	0.00655499	0.00260021	0.801916	0.999107	SEKER
36955	708.623	241.9	194.679	1.24256	0.59356	37410	216.916	0.774657	0.987837	0.92481	0.896717	0.00654581	0.00261074	0.804101	0.999145	SEKER
36955	697.491	235.645	199.854	1.17909	0.529813	37319	216.916	0.768775	0.990246	0.954566	0.920522	0.00637653	0.00282423	0.847361	0.999111	SEKER
36957	696.21	245.41	191.996	1.2782	0.622843	37260	216.922	0.767954	0.991868	0.958134	0.883916	0.00664042	0.00250046	0.781308	0.998672	SEKER
36968	693.68	246.991	190.775	1.29468	0.635143	37213	216.954	0.777782	0.993416	0.965423	0.878388	0.00668122	0.00245347	0.771565	0.998927	SEKER
36975	694.805	241.368	195.189	1.23658	0.58825	37252	216.975	0.777423	0.992564	0.962481	0.898938	0.00652787	0.00262948	0.808089	0.999271	SEKER
36975	692.588	239.662	196.526	1.21949	0.57234	37239	216.975	0.757436	0.992911	0.968653	0.905338	0.00648172	0.00268605	0.819637	0.999538	SEKER
36976	692.719	242.851	194.06	1.25142	0.60121	37264	216.978	0.799377	0.992271	0.968313	0.893461	0.0065678	0.00258167	0.798272	0.998974	SEKER
36980	697.756	227.469	207.2	1.09782	0.41264	37374	216.989	0.792882	0.989458	0.954486	0.953929	0.00615114	0.00314196	0.909981	0.998998	SEKER
36982	708.896	244.453	192.915	1.26715	0.614172	37558	216.995	0.760024	0.984664	0.924773	0.887678	0.00661004	0.00253166	0.787972	0.998479	SEKER
36986	693.771	232.714	202.592	1.14868	0.49206	37350	217.007	0.771748	0.990254	0.965639	0.932506	0.00629194	0.00293475	0.869568	0.998858	SEKER
36988	697.873	242.501	194.498	1.2468	0.597257	37312	217.013	0.762168	0.991316	0.954373	0.894894	0.00655621	0.0025937	0.800835	0.998485	SEKER
36993	697.963	234.354	201.193	1.16482	0.512814	37364	217.028	0.777393	0.990071	0.954255	0.926068	0.00633509	0.00287411	0.857602	0.998954	SEKER
36995	694.774	245.207	192.337	1.27488	0.620272	37328	217.033	0.741234	0.991079	0.963088	0.885104	0.0066281	0.00250926	0.783409	0.998753	SEKER
37004	696.689	246.474	191.406	1.28771	0.630025	37330	217.06	0.790768	0.991267	0.958033	0.88066	0.00666074	0.00247135	0.775561	0.998695	SEKER
37008	691.802	242.247	194.614	1.24475	0.595478	37288	217.072	0.793346	0.992491	0.971722	0.896075	0.0065458	0.00260327	0.80295	0.999475	SEKER
37027	698.113	245.181	192.438	1.27408	0.619648	37328	217.127	0.786269	0.991936	0.954722	0.885578	0.00662169	0.00251221	0.784249	0.999196	SEKER
37031	700.842	245.14	192.463	1.2737	0.619351	37423	217.139	0.764503	0.989525	0.947404	0.885776	0.00661985	0.00251376	0.7846	0.999345	SEKER
37039	690.695	236.016	200.053	1.17977	0.530601	37324	217.162	0.772853	0.992364	0.975655	0.920116	0.0063721	0.0028173	0.846614	0.998811	SEKER
37043	710.832	246.121	191.897	1.28257	0.62617	37450	217.174	0.762892	0.989132	0.92126	0.882388	0.00664419	0.00248463	0.778609	0.998619	SEKER
37047	710.523	249.186	189.471	1.31517	0.649502	37442	217.186	0.797808	0.98945	0.922161	0.871581	0.00672621	0.00239432	0.759654	0.999071	SEKER
37049	692.49	235.953	200.186	1.17867	0.52933	37347	217.192	0.783807	0.992021	0.970866	0.920489	0.00636866	0.00282034	0.8473	0.998684	SEKER
37053	735.079	243.119	194.377	1.25076	0.600647	37533	217.203	0.754859	0.987211	0.861718	0.893403	0.00656139	0.00257849	0.798168	0.998316	SEKER
37068	704.024	245.365	192.527	1.27444	0.619931	37452	217.247	0.809522	0.989747	0.939797	0.885405	0.00661932	0.00250935	0.783942	0.99909	SEKER
37074	720.184	235.531	200.752	1.17324	0.522987	37612	217.265	0.754841	0.985696	0.89824	0.922449	0.00635299	0.00283744	0.850911	0.998323	SEKER
37075	699.179	233.451	202.368	1.1536	0.498562	37441	217.268	0.792201	0.990225	0.953047	0.930679	0.00629672	0.00291403	0.866164	0.999204	SEKER
37083	704.984	237.16	199.692	1.18763	0.539459	37498	217.291	0.767541	0.988933	0.937619	0.916221	0.00639539	0.00278002	0.839462	0.996971	SEKER
37090	693.447	242.422	194.953	1.24349	0.594378	37376	217.312	0.789233	0.992348	0.96926	0.896418	0.00653606	0.00260338	0.803565	0.999228	SEKER
37092	706.388	238.347	198.409	1.20129	0.554119	37492	217.318	0.793785	0.989331	0.934122	0.911769	0.00642584	0.00273936	0.831324	0.998662	SEKER
37094	691.978	240.591	196.498	1.22439	0.577018	37364	217.324	0.759874	0.992774	0.973484	0.903292	0.00648597	0.00266359	0.815937	0.999028	SEKER
37109	694.497	239.86	197.202	1.21631	0.569261	37419	217.368	0.787476	0.991715	0.966826	0.906228	0.00646365	0.0026891	0.821249	0.998895	SEKER
37109	694.219	249.222	189.71	1.3137	0.648507	37369	217.368	0.769003	0.993042	0.967601	0.872183	0.00671596	0.00239728	0.760703	0.999336	SEKER
37114	702.71	238.447	198.391	1.2019	0.554751	37525	217.382	0.762533	0.989047	0.944486	0.91166	0.00642471	0.00273756	0.831124	0.998927	SEKER
37117	699.991	249.514	189.778	1.31477	0.649233	37429	217.391	0.750051	0.991664	0.951914	0.871256	0.00672238	0.00238938	0.759087	0.998025	SEKER
37135	696.823	242.789	195.131	1.24424	0.595029	37424	217.444	0.750611	0.992278	0.961055	0.895608	0.00653801	0.00259475	0.802113	0.99802	SEKER
37138	707.772	252.256	187.594	1.34469	0.668553	37506	217.452	0.750354	0.990188	0.931626	0.862031	0.0067924	0.00231363	0.743097	0.999236	SEKER
37152	694.797	246.691	192.217	1.2834	0.6268	37406	217.493	0.776848	0.99321	0.967111	0.881644	0.00664004	0.00247471	0.777297	0.997582	SEKER
37164	710.014	251.925	188.174	1.33879	0.664886	37548	217.529	0.744859	0.989773	0.9264	0.863466	0.00677874	0.00232439	0.745573	0.998163	SEKER
37165	692.541	236.984	199.917	1.18541	0.53699	37477	217.531	0.750308	0.991675	0.973762	0.917915	0.00637654	0.00279239	0.842569	0.998791	SEKER
37170	693.745	232.975	203.259	1.1462	0.488706	37485	217.546	0.792656	0.991597	0.970516	0.933773	0.00626783	0.00293943	0.871932	0.999408	SEKER
37177	692.052	235.086	201.573	1.16626	0.514577	37506	217.567	0.780423	0.991228	0.975454	0.925478	0.00632342	0.00286151	0.856509	0.998909	SEKER
37179	704.496	240.384	197.179	1.21911	0.571978	37555	217.572	0.771669	0.989988	0.941349	0.905105	0.00646557	0.0026766	0.819216	0.998716	SEKER
37187	706.995	246.093	192.845	1.27612	0.621234	37563	217.596	0.742611	0.98999	0.934907	0.884202	0.00661771	0.00249513	0.781813	0.997687	SEKER
37189	700.253	243.343	194.91	1.24849	0.598708	37534	217.602	0.784826	0.990808	0.953047	0.894217	0.00654342	0.00258081	0.799623	0.998322	SEKER
37190	738.964	243.83	194.384	1.25437	0.603698	37707	217.605	0.78566	0.986289	0.855834	0.892445	0.00655632	0.00256547	0.796459	0.999054	SEKER
37191	698.872	234.889	201.764	1.16418	0.512017	37541	217.608	0.787361	0.990677	0.956869	0.926428	0.00631574	0.00286979	0.858268	0.999177	SEKER
37196	700.485	233.099	203.346	1.14632	0.48887	37561	217.622	0.774143	0.990282	0.952595	0.933603	0.00626678	0.0029368	0.871615	0.99915	SEKER
37211	701.519	244.697	194.129	1.26049	0.608775	37559	217.666	0.7926	0.990735	0.950172	0.889534	0.00657593	0.00253972	0.79127	0.997387	SEKER
37212	698.087	241.886	196.056	1.23376	0.585695	37535	217.669	0.776739	0.991395	0.959564	0.899882	0.00650022	0.00262936	0.809788	0.999082	SEKER
37220	697.179	246.03	192.882	1.27555	0.620791	37513	217.692	0.762455	0.992189	0.962272	0.88482	0.00661016	0.00249926	0.782906	0.998635	SEKER
37225	713.798	252.813	188.527	1.34099	0.666263	37629	217.707	0.792899	0.989264	0.918108	0.861137	0.00679149	0.00230375	0.741557	0.994422	SEKER
37227	698.145	241.324	196.744	1.22659	0.579082	37555	217.713	0.782721	0.991266	0.959791	0.90216	0.0064825	0.00264885	0.813893	0.998312	SEKER
37240	695.977	244.753	194.084	1.26106	0.609245	37527	217.751	0.789954	0.992352	0.966117	0.889677	0.00657231	0.00253996	0.791525	0.998163	SEKER
37248	705.116	232.271	204.479	1.13592	0.474331	37661	217.774	0.781372	0.989034	0.941438	0.937587	0.0062358	0.00297247	0.879069	0.998549	SEKER
37248	703.557	249.152	190.707	1.30647	0.643527	37633	217.774	0.735981	0.98977	0.945615	0.874062	0.006689	0.00240829	0.763984	0.998119	SEKER
37256	693.806	245.934	193.076	1.27377	0.619404	37502	217.798	0.775069	0.99344	0.97259	0.885594	0.00660119	0.00250461	0.784277	0.998986	SEKER
37264	693.036	239.744	198.164	1.20982	0.562839	37541	217.821	0.783499	0.992621	0.974962	0.908558	0.00643365	0.00270426	0.825478	0.998683	SEKER
37265	700.187	232.937	204.158	1.14096	0.48149	37602	217.824	0.778951	0.991038	0.955175	0.935118	0.00625083	0.00294838	0.874446	0.997712	SEKER
37268	714.729	250.06	189.923	1.31664	0.650498	37667	217.833	0.75125	0.989407	0.916776	0.87112	0.00670979	0.00238342	0.75885	0.999134	SEKER
37301	711.888	229.382	207.109	1.10754	0.429846	37731	217.929	0.781992	0.988604	0.924926	0.950073	0.00614948	0.00309061	0.902638	0.999707	SEKER
37301	699.032	251.587	189.099	1.33045	0.659593	37579	217.929	0.737743	0.992602	0.95926	0.866216	0.00674479	0.00234236	0.750331	0.99828	SEKER
37308	698.873	240.098	198.45	1.20987	0.562882	37607	217.95	0.799537	0.992049	0.959876	0.907754	0.00643555	0.00269549	0.824017	0.996951	SEKER
37311	694.501	240.877	197.615	1.21892	0.571789	37590	217.958	0.748015	0.992578	0.972078	0.904855	0.00645591	0.00266964	0.818762	0.998003	SEKER
37315	701.999	238.055	199.836	1.19125	0.543431	37735	217.97	0.775393	0.98887	0.951525	0.91563	0.0063796	0.00276601	0.838379	0.998719	SEKER
37322	695.359	240.962	197.329	1.22112	0.573909	37630	217.99	0.772712	0.991815	0.969966	0.904666	0.00645631	0.00266758	0.81842	0.99939	SEKER
37348	702.527	242.761	196.616	1.23469	0.586544	37715	218.066	0.815014	0.990269	0.950936	0.898276	0.00649997	0.00261054	0.8069	0.996275	SEKER
37348	701.625	239.791	198.516	1.20792	0.560917	37690	218.066	0.785943	0.990926	0.953382	0.909403	0.00642044	0.00270876	0.827014	0.998964	SEKER
37350	699.848	238.173	199.954	1.19114	0.543307	37637	218.072	0.786283	0.992375	0.958281	0.915604	0.00637679	0.00276448	0.838331	0.998567	SEKER
37352	703.246	241.941	196.931	1.22856	0.580916	37811	218.078	0.802751	0.987861	0.949094	0.901368	0.00647733	0.00263745	0.812464	0.998158	SEKER
37353	701.883	237.323	200.896	1.18132	0.532373	37752	218.081	0.776441	0.989431	0.952809	0.918922	0.00635351	0.00279452	0.844417	0.997529	SEKER
37362	721.309	234.393	203.511	1.15175	0.496132	37914	218.107	0.761573	0.985441	0.902396	0.930518	0.00627358	0.00290131	0.865863	0.997254	SEKER
37362	714.562	263.886	180.413	1.46268	0.729784	37693	218.107	0.739842	0.991219	0.919518	0.826521	0.00706295	0.00203321	0.683138	0.999209	SEKER
37365	700.139	247.568	192.319	1.28728	0.629708	37673	218.116	0.754848	0.991824	0.957869	0.881034	0.00662567	0.00246252	0.77622	0.999213	SEKER
37365	702.379	247.354	192.709	1.28356	0.62692	37705	218.116	0.784518	0.990983	0.95177	0.881797	0.00661994	0.00246893	0.777566	0.998052	SEKER
37366	700.27	238.964	199.227	1.19946	0.552201	37744	218.119	0.762074	0.989985	0.957537	0.912769	0.00639523	0.00273828	0.833146	0.999322	SEKER
37388	707.703	232.971	204.624	1.13853	0.478061	37784	218.183	0.806993	0.989519	0.93808	0.936527	0.00623116	0.00295685	0.877083	0.998584	SEKER
37393	699.759	237.231	200.929	1.18067	0.531626	37751	218.198	0.763871	0.990517	0.959629	0.919771	0.00634425	0.00280078	0.845978	0.998818	SEKER
37393	696.723	244.043	195.237	1.24999	0.59999	37667	218.198	0.78228	0.992726	0.96801	0.894094	0.00652644	0.0025727	0.799404	0.999246	SEKER
37394	704.489	240.072	198.618	1.20871	0.561723	37814	218.201	0.758745	0.988893	0.946811	0.908897	0.00642007	0.00270257	0.826093	0.998511	SEKER
37410	697.345	241.495	197.434	1.22317	0.575859	37739	218.247	0.753019	0.991282	0.966723	0.903735	0.00645536	0.00265622	0.816737	0.999006	SEKER
37420	704.994	238.973	199.79	1.19612	0.548676	37757	218.276	0.755899	0.991075	0.946113	0.913394	0.00638624	0.00274194	0.834289	0.997911	SEKER
37424	695.317	238.583	199.84	1.19387	0.546267	37686	218.288	0.781343	0.993048	0.972735	0.914937	0.00637513	0.00275571	0.83711	0.999402	SEKER
37429	710.889	252.613	188.784	1.33811	0.664458	37813	218.303	0.770842	0.989845	0.93071	0.86418	0.00674911	0.0023219	0.746807	0.999306	SEKER
37430	699.619	245.261	194.85	1.25872	0.607316	37742	218.306	0.736898	0.991733	0.960963	0.890094	0.00655253	0.00253707	0.792268	0.99724	SEKER
37438	698.989	238.794	199.755	1.19543	0.547942	37738	218.329	0.776223	0.99205	0.962901	0.914299	0.00637838	0.00274943	0.835942	0.999314	SEKER
37438	711.096	248.509	192.087	1.29373	0.634457	37803	218.329	0.791836	0.990345	0.930392	0.878555	0.00663789	0.00243941	0.771859	0.998579	SEKER
37445	703.374	241.238	197.856	1.21926	0.572118	37798	218.349	0.750461	0.990661	0.951111	0.90512	0.00644246	0.00266721	0.819243	0.998868	SEKER
37446	698.296	241.433	197.695	1.22124	0.574025	37754	218.352	0.74973	0.991842	0.96502	0.904401	0.0064475	0.00266082	0.817941	0.998905	SEKER
37453	706.241	236.523	201.98	1.17102	0.520346	37925	218.373	0.754113	0.987554	0.943606	0.923264	0.00631518	0.00283054	0.852416	0.998197	SEKER
37454	698.809	245.968	193.998	1.26789	0.614764	37765	218.376	0.753162	0.991765	0.963809	0.887822	0.0065672	0.00251689	0.788228	0.999387	SEKER
37459	699.387	244.59	195.158	1.2533	0.602796	37773	218.39	0.754006	0.991687	0.962345	0.892881	0.00652955	0.00255999	0.797237	0.999174	SEKER
37475	713.238	241.196	198.301	1.21631	0.569258	37837	218.437	0.77749	0.990433	0.925726	0.905642	0.00643617	0.00267075	0.820187	0.997602	SEKER
37479	703.264	229.016	208.467	1.09857	0.414015	37879	218.448	0.781464	0.98944	0.952272	0.953855	0.00611053	0.00312024	0.90984	0.999527	SEKER
37482	705.803	244.497	195.38	1.25139	0.601185	37878	218.457	0.777635	0.989545	0.945509	0.893495	0.00652306	0.00256448	0.798333	0.999028	SEKER
37482	693.294	239.285	199.59	1.19888	0.551594	37731	218.457	0.76152	0.993401	0.979936	0.912959	0.00638399	0.00273576	0.833495	0.999259	SEKER
37483	699.808	244.469	195.453	1.25079	0.60067	37793	218.46	0.774762	0.991797	0.961804	0.893609	0.00652214	0.00256543	0.798538	0.9988	SEKER
37492	701.925	242.984	196.911	1.23398	0.585897	37814	218.486	0.77144	0.991485	0.95624	0.899179	0.00648097	0.00261339	0.808523	0.997701	SEKER
37492	701.454	246.631	193.84	1.27234	0.618284	37828	218.486	0.751403	0.991118	0.957525	0.885885	0.00657822	0.00249918	0.784793	0.998522	SEKER
37493	695.177	242.867	196.684	1.23481	0.586649	37758	218.489	0.781772	0.992982	0.974921	0.899625	0.00647767	0.00261724	0.809324	0.999362	SEKER
37506	700.778	247.58	193.218	1.28135	0.625246	37812	218.527	0.742973	0.991907	0.959731	0.882653	0.00660108	0.00247146	0.779076	0.998268	SEKER
37512	712.467	250.54	190.918	1.31229	0.647545	37891	218.545	0.790992	0.989998	0.928647	0.872296	0.00667892	0.00238529	0.7609	0.99852	SEKER
37512	704.306	243.247	196.678	1.23678	0.588422	37910	218.545	0.775731	0.989501	0.950293	0.898446	0.00648452	0.00260631	0.807206	0.998333	SEKER
37513	706.094	232.982	205.408	1.13424	0.471909	37951	218.548	0.754151	0.988459	0.945511	0.938045	0.0062107	0.0029663	0.879929	0.998051	SEKER
37516	708.078	244.597	195.633	1.25028	0.600243	37869	218.556	0.779019	0.990678	0.940295	0.893536	0.00651981	0.00256367	0.798407	0.998236	SEKER
37533	703.354	237.388	201.413	1.17862	0.529271	37918	218.606	0.774068	0.989847	0.9534	0.920879	0.00632478	0.00280567	0.848019	0.999488	SEKER
37539	701.891	239.573	199.719	1.19955	0.5523	37844	218.623	0.785056	0.991941	0.957532	0.912554	0.00638197	0.00273004	0.832755	0.998933	SEKER
37540	711.089	235.931	202.974	1.16237	0.509769	38001	218.626	0.766748	0.987869	0.932945	0.926654	0.00628479	0.00285851	0.858687	0.998112	SEKER
37548	703.892	246.06	194.432	1.26553	0.612874	37881	218.649	0.782739	0.991209	0.952324	0.888603	0.00655321	0.00252037	0.789615	0.999283	SEKER
37553	702.511	241.56	198.049	1.2197	0.572541	37880	218.664	0.778204	0.991367	0.956199	0.905216	0.00643251	0.00266422	0.819417	0.99944	SEKER
37557	697.113	244.933	195.328	1.25396	0.60335	37810	218.676	0.765095	0.993309	0.971168	0.892797	0.00652164	0.00255592	0.797087	0.999511	SEKER
37564	736.706	236.46	202.526	1.16755	0.516162	38184	218.696	0.766299	0.983763	0.869748	0.924875	0.00629486	0.00284117	0.855393	0.998718	SEKER
37574	712.47	253.499	188.904	1.34194	0.666855	38001	218.725	0.748113	0.988763	0.930174	0.862824	0.00674667	0.00230652	0.744464	0.99903	SEKER
37577	704.505	246.682	194.283	1.2697	0.616206	37883	218.734	0.755438	0.991922	0.951401	0.886704	0.00656471	0.00250328	0.786244	0.998297	SEKER
37580	703.04	243.494	196.71	1.23783	0.589369	37934	218.743	0.798895	0.990668	0.955447	0.898351	0.00647934	0.00260312	0.807034	0.998972	SEKER
37580	698.245	242.687	197.399	1.22942	0.58172	37888	218.743	0.786324	0.991871	0.968615	0.901338	0.00645787	0.00262917	0.81241	0.998797	SEKER
37606	700.716	229.644	209.019	1.09867	0.414194	37942	218.818	0.785734	0.991144	0.962461	0.952859	0.00610657	0.00310522	0.907941	0.997531	SEKER
37606	696.136	238.356	201.099	1.18527	0.53683	37883	218.818	0.780612	0.992688	0.975167	0.918031	0.00633824	0.00277702	0.842782	0.998923	SEKER
37631	744.128	248.9	192.993	1.28968	0.631491	38388	218.891	0.750354	0.98028	0.854005	0.879435	0.00661422	0.00244046	0.773405	0.997449	SEKER
37637	703.354	250.544	191.528	1.30813	0.644683	37959	218.908	0.786332	0.991517	0.956042	0.873732	0.00665686	0.00239311	0.763408	0.998637	SEKER
37642	699.339	240.44	199.767	1.2036	0.55651	37928	218.923	0.746895	0.992459	0.967179	0.910511	0.00638754	0.00270804	0.829031	0.997822	SEKER
37644	695.582	238.916	200.794	1.18985	0.541905	37973	218.929	0.779153	0.991336	0.977708	0.916343	0.00634672	0.00276033	0.839684	0.999101	SEKER
37646	703.337	249.238	192.551	1.2944	0.634944	37941	218.935	0.803578	0.992225	0.956317	0.878416	0.00662057	0.00243151	0.771615	0.99878	SEKER
37652	693.787	231.779	206.946	1.12	0.450334	37917	218.952	0.783274	0.993011	0.982982	0.94466	0.00615581	0.0030239	0.892382	0.999465	SEKER
37657	704.416	252.095	190.573	1.32283	0.654621	37993	218.967	0.747459	0.991156	0.953668	0.868587	0.00669451	0.00235046	0.754444	0.997998	SEKER
37663	712.345	233.57	205.828	1.13478	0.472692	38084	218.984	0.753999	0.988945	0.932704	0.937553	0.00620157	0.00295573	0.879006	0.997479	SEKER
37669	698.99	243.285	197.669	1.23077	0.582966	37937	219.002	0.75495	0.992936	0.96884	0.900183	0.00645851	0.00261599	0.81033	0.997333	SEKER
37679	707.574	242.452	198.131	1.2237	0.576361	38045	219.031	0.778492	0.99038	0.945726	0.903397	0.00643468	0.00264375	0.816125	0.998691	SEKER
37681	703.836	248.221	193.632	1.28192	0.625682	38044	219.036	0.754435	0.990458	0.955849	0.882425	0.00658743	0.00246381	0.778673	0.9982	SEKER
37682	715.569	246.571	194.781	1.26589	0.613161	38157	219.039	0.77441	0.987551	0.924785	0.888342	0.00654347	0.00251367	0.789151	0.998978	SEKER
37688	710.5	238.582	201.472	1.18419	0.535625	38083	219.057	0.777649	0.989628	0.938177	0.918163	0.00633044	0.00277519	0.843022	0.998302	SEKER
37690	702.993	247.279	194.41	1.27194	0.617974	37977	219.063	0.779363	0.992443	0.958372	0.885893	0.00656086	0.00249267	0.784806	0.998229	SEKER
37693	709.359	252.262	190.474	1.32439	0.655651	38032	219.071	0.775002	0.991086	0.941322	0.868429	0.00669253	0.00234805	0.754169	0.998814	SEKER
37693	701.429	246.674	194.883	1.26575	0.613052	37995	219.071	0.769968	0.992052	0.962727	0.888099	0.0065443	0.00251124	0.78872	0.998326	SEKER
37706	717.777	250.627	191.968	1.30556	0.642897	38097	219.109	0.767318	0.989737	0.91969	0.874243	0.00664688	0.00239511	0.764301	0.997844	SEKER
37720	706.226	238.254	201.965	1.17968	0.530495	38103	219.15	0.755427	0.989948	0.950373	0.919817	0.00631637	0.00278903	0.846063	0.998083	SEKER
37722	699.287	237.205	202.802	1.16964	0.518689	38031	219.156	0.798603	0.991875	0.969379	0.923907	0.00628825	0.00282633	0.853604	0.99841	SEKER
37733	715.114	251.952	190.797	1.32052	0.653095	38142	219.187	0.77861	0.989277	0.927215	0.869959	0.00667722	0.00235923	0.756828	0.999408	SEKER
37735	722.21	251.771	191.262	1.31636	0.650311	38145	219.193	0.791256	0.989252	0.909133	0.870605	0.00667209	0.00236443	0.757953	0.997743	SEKER
37761	698.336	236.559	203.465	1.16265	0.51012	38115	219.269	0.781494	0.990712	0.973026	0.92691	0.00626464	0.0028525	0.859162	0.998905	SEKER
37765	704.943	237.205	202.995	1.16852	0.517338	38130	219.28	0.783913	0.990427	0.954974	0.924435	0.00628107	0.00282956	0.85458	0.998597	SEKER
37771	712.802	242.648	198.544	1.22214	0.574882	38155	219.298	0.748593	0.989936	0.93418	0.903768	0.0064242	0.00264379	0.816797	0.998241	SEKER
37776	700.671	246.176	196.034	1.25578	0.604881	38029	219.312	0.735514	0.993347	0.966936	0.890877	0.00651672	0.0025321	0.793662	0.996668	SEKER
37777	716.007	250.175	192.704	1.29823	0.637708	38174	219.315	0.770519	0.9896	0.925983	0.876648	0.00662241	0.00241267	0.768513	0.997708	SEKER
37784	702.271	242.227	198.872	1.21801	0.570909	38106	219.336	0.8018	0.99155	0.962738	0.905496	0.00641083	0.00265853	0.819924	0.998673	SEKER
37791	713.544	245.052	196.528	1.24691	0.597345	38169	219.356	0.76401	0.990097	0.932732	0.89514	0.0064844	0.00256811	0.801276	0.999117	SEKER
37810	713.014	243.745	197.75	1.23259	0.584633	38222	219.411	0.781521	0.989221	0.934588	0.900164	0.00644659	0.00261094	0.810296	0.998765	SEKER
37810	712.632	241.102	200.035	1.2053	0.558258	38253	219.411	0.797679	0.988419	0.935591	0.910034	0.00637668	0.00269776	0.828161	0.998184	SEKER
37822	699.758	235.232	204.881	1.14814	0.491324	38130	219.446	0.785928	0.991922	0.970641	0.932892	0.00621944	0.00290574	0.870287	0.999208	SEKER
37826	704.225	242.586	198.866	1.21985	0.572688	38170	219.457	0.764532	0.990988	0.958468	0.904657	0.00641321	0.00264967	0.818405	0.998331	SEKER
37833	703.902	242.016	199.235	1.21473	0.567709	38173	219.478	0.760921	0.991093	0.959525	0.906873	0.00639696	0.00266894	0.822418	0.999015	SEKER
37838	702.47	242.014	199.374	1.21387	0.566864	38142	219.492	0.777887	0.99203	0.963568	0.90694	0.00639606	0.00266935	0.822539	0.998456	SEKER
37844	703.919	245.775	196.191	1.25274	0.602323	38174	219.51	0.767689	0.991355	0.959758	0.893132	0.00649442	0.00254908	0.797686	0.99929	SEKER
37848	697.327	240.962	200.146	1.20393	0.55685	38105	219.521	0.795778	0.993255	0.978092	0.91102	0.00636657	0.00270518	0.829957	0.99921	SEKER
37849	713.618	251.882	191.671	1.31414	0.648804	38243	219.524	0.775531	0.989697	0.933969	0.871537	0.00665491	0.00236846	0.759577	0.998189	SEKER
37856	708.716	248.43	194.36	1.27819	0.622835	38232	219.544	0.74464	0.990165	0.947109	0.883726	0.00656251	0.002469	0.780972	0.998235	SEKER
37861	712.99	253.52	190.351	1.33185	0.660492	38226	219.559	0.747872	0.990452	0.935912	0.866041	0.00669608	0.00232356	0.750027	0.998927	SEKER
37865	707.053	243.058	198.495	1.22451	0.577126	38220	219.571	0.779821	0.990712	0.951796	0.903367	0.00641907	0.00263699	0.816071	0.999285	SEKER
37884	699.809	249.371	193.592	1.28813	0.63034	38145	219.626	0.755399	0.993158	0.97209	0.880718	0.00658249	0.00244297	0.775665	0.999157	SEKER
37884	703.214	246.515	195.984	1.25783	0.606585	38173	219.626	0.799494	0.992429	0.962699	0.890922	0.0065071	0.00252887	0.793743	0.998395	SEKER
37889	707.045	240.154	201.179	1.19373	0.546118	38247	219.64	0.784143	0.99064	0.952421	0.914579	0.00633837	0.00273553	0.836454	0.998503	SEKER
37891	713.155	227.011	212.784	1.06686	0.348447	38377	219.646	0.783665	0.987336	0.93622	0.967554	0.00599117	0.00323887	0.936161	0.998755	SEKER
37904	710.507	231.733	208.671	1.11052	0.434901	38307	219.684	0.809396	0.98948	0.943535	0.948002	0.00611369	0.00304593	0.898708	0.998034	SEKER
37906	699.816	242.126	199.709	1.21239	0.565401	38203	219.689	0.794908	0.992226	0.972635	0.907336	0.00638753	0.00267045	0.823258	0.998111	SEKER
37916	732.54	259.533	186.686	1.39021	0.694684	38307	219.718	0.784913	0.989793	0.887912	0.846591	0.00684494	0.00216893	0.716717	0.996388	SEKER
37918	701.991	234.783	205.892	1.14032	0.480593	38269	219.724	0.779484	0.990828	0.966924	0.93586	0.00619187	0.00292984	0.875834	0.998734	SEKER
37919	701.737	243.354	198.8	1.22411	0.576753	38208	219.727	0.753437	0.992436	0.967649	0.902913	0.00641772	0.00263114	0.815252	0.99796	SEKER
37927	697.748	233.26	207.163	1.12597	0.459612	38208	219.75	0.791845	0.992646	0.978951	0.942083	0.00615023	0.00298833	0.887521	0.999325	SEKER
37928	703.265	241.153	200.684	1.20165	0.554496	38236	219.753	0.754186	0.991945	0.963678	0.91126	0.00635818	0.00270446	0.830394	0.997846	SEKER
37937	700.065	242.42	199.491	1.21519	0.568162	38213	219.779	0.782045	0.992777	0.972739	0.906607	0.00639005	0.00266293	0.821936	0.998808	SEKER
37951	699.222	240.525	201.149	1.19576	0.548289	38269	219.82	0.775729	0.99169	0.975445	0.913915	0.00633779	0.00272734	0.83524	0.998746	SEKER
37957	713.931	255.159	189.962	1.34321	0.667639	38297	219.837	0.786429	0.991122	0.935813	0.861567	0.00672233	0.00228484	0.742298	0.997063	SEKER
37968	709.268	252.15	191.9	1.31397	0.648687	38292	219.869	0.785307	0.991539	0.948433	0.871978	0.00664111	0.00236833	0.760345	0.999067	SEKER
37969	699.361	239.413	202.302	1.18344	0.53478	38269	219.872	0.793318	0.992161	0.97552	0.91838	0.00630548	0.00276686	0.843422	0.998144	SEKER
37970	703.416	246.498	196.489	1.25451	0.603819	38241	219.875	0.75004	0.992913	0.964331	0.891993	0.00649192	0.00253512	0.795651	0.998155	SEKER
37987	701.371	244.466	198.011	1.23461	0.586469	38307	219.924	0.775878	0.991646	0.970397	0.899608	0.00643553	0.00260002	0.809294	0.999164	SEKER
37995	703.86	252.803	191.76	1.31833	0.651634	38262	219.947	0.783402	0.993022	0.963749	0.870033	0.00665359	0.00235169	0.756958	0.997923	SEKER
37996	723.824	247.204	196.765	1.25635	0.605351	38627	219.95	0.767813	0.983664	0.911343	0.889749	0.00650607	0.00251518	0.791654	0.994591	SEKER
37997	706.226	246.904	196.22	1.2583	0.606974	38305	219.953	0.776178	0.991959	0.957352	0.890845	0.00649798	0.00252444	0.793604	0.998594	SEKER
37998	727.603	247.758	196.106	1.26339	0.611141	38651	219.956	0.753495	0.983105	0.901948	0.887786	0.00652028	0.0024985	0.788165	0.995759	SEKER
38001	725.626	240.242	201.817	1.1904	0.542501	38491	219.964	0.749261	0.98727	0.906941	0.915595	0.006322	0.00274061	0.838314	0.997927	SEKER
38008	715.481	255.363	189.7	1.34614	0.66944	38388	219.985	0.760464	0.990101	0.933015	0.861461	0.00671865	0.00228246	0.742114	0.998988	SEKER
38010	713.114	239.847	202.004	1.18734	0.539133	38445	219.991	0.752614	0.988685	0.939269	0.917212	0.0063101	0.00275483	0.841278	0.998881	SEKER
38016	702.523	242.059	200.262	1.20871	0.561722	38312	220.008	0.748936	0.992274	0.967955	0.908901	0.0063673	0.00268041	0.826101	0.998519	SEKER
38017	707.111	246.269	196.81	1.2513	0.60111	38373	220.011	0.757809	0.990723	0.95546	0.893377	0.00647786	0.00254536	0.798122	0.998693	SEKER
38019	716.827	246.137	196.985	1.24952	0.59959	38422	220.017	0.760274	0.989511	0.929784	0.89388	0.00647404	0.0025496	0.799022	0.998393	SEKER
38025	713.907	245.805	197.175	1.24663	0.597106	38428	220.034	0.789588	0.989513	0.937553	0.895157	0.00646429	0.00256034	0.801307	0.998933	SEKER
38042	723.178	243.92	198.876	1.2265	0.578995	38508	220.083	0.783886	0.987899	0.914077	0.902274	0.00641187	0.00262131	0.814099	0.998489	SEKER
38048	710.956	250.699	193.843	1.29331	0.634151	38384	220.1	0.769066	0.991246	0.945924	0.877946	0.00658903	0.00241475	0.77079	0.996871	SEKER
38058	702.407	243.777	198.999	1.22501	0.577604	38365	220.129	0.743146	0.991998	0.969345	0.902996	0.0064054	0.00262706	0.815402	0.998879	SEKER
38061	701.644	240.187	201.963	1.18926	0.541259	38398	220.138	0.784278	0.991224	0.97153	0.916527	0.00631059	0.00274682	0.840021	0.999007	SEKER
38066	704.695	236.663	205.139	1.15367	0.498658	38393	220.153	0.795694	0.991483	0.963263	0.930237	0.00621717	0.00287176	0.865342	0.998319	SEKER
38067	707.292	247.875	195.71	1.26654	0.613685	38350	220.155	0.786833	0.992621	0.956227	0.88817	0.00651155	0.00249948	0.788847	0.999108	SEKER
38084	715.166	249.175	194.819	1.279	0.623456	38468	220.205	0.768582	0.990018	0.935704	0.883736	0.00654276	0.00246168	0.78099	0.998889	SEKER
38090	805.266	234.894	207.543	1.13179	0.468318	39006	220.222	0.792386	0.976516	0.738146	0.937537	0.00616682	0.00293897	0.878976	0.994812	SEKER
38091	716.472	247.038	196.939	1.25439	0.603715	38511	220.225	0.781274	0.989094	0.932468	0.891461	0.00648547	0.00252657	0.794703	0.996867	SEKER
38093	737.757	233.468	207.998	1.12246	0.454192	38859	220.231	0.770116	0.980288	0.879485	0.943299	0.00612891	0.00299337	0.889813	0.998776	SEKER
38094	725.104	250.179	194.257	1.28787	0.63015	38577	220.233	0.774331	0.98748	0.91047	0.880304	0.00656741	0.00243279	0.774935	0.998019	SEKER
38095	707.285	249.073	194.93	1.27776	0.622499	38413	220.236	0.776609	0.991722	0.956949	0.884225	0.0065382	0.00246541	0.781853	0.999019	SEKER
38104	704.491	250.544	193.835	1.29257	0.633607	38377	220.262	0.76491	0.992886	0.964783	0.879135	0.00657528	0.0024228	0.772879	0.998997	SEKER
38115	711.327	238.479	203.805	1.17013	0.51928	38531	220.294	0.78776	0.989203	0.946602	0.923747	0.00625683	0.00281025	0.853308	0.998484	SEKER
38116	722.078	250.748	194.044	1.29223	0.633359	38556	220.297	0.75657	0.988588	0.918648	0.878559	0.00657856	0.00241765	0.771865	0.997425	SEKER
38117	699.123	238.594	203.596	1.1719	0.521396	38406	220.3	0.767745	0.992475	0.979989	0.923326	0.00625952	0.00280634	0.85253	0.999081	SEKER
38118	716.011	259.924	186.919	1.39057	0.694878	38468	220.303	0.730118	0.990902	0.934331	0.847566	0.00681894	0.00217065	0.718367	0.998943	SEKER
38118	707.806	249.098	195.205	1.27608	0.621204	38477	220.303	0.758567	0.99067	0.956118	0.884403	0.00653491	0.00246615	0.782168	0.99811	SEKER
38121	704.92	236.598	205.364	1.15209	0.496588	38440	220.312	0.77989	0.991701	0.964039	0.931163	0.0062065	0.00287826	0.867065	0.998939	SEKER
38122	710.41	246.906	196.835	1.25438	0.603708	38481	220.314	0.774837	0.990671	0.949221	0.892302	0.00647673	0.00253269	0.796202	0.998742	SEKER
38125	704.918	238.65	203.507	1.17268	0.522327	38406	220.323	0.793874	0.992683	0.964145	0.923207	0.00625967	0.00280496	0.852311	0.999491	SEKER
38134	717.612	247.752	196.272	1.26229	0.610247	38522	220.349	0.778404	0.989928	0.930557	0.889394	0.00649688	0.00250762	0.791022	0.998499	SEKER
38145	762.943	256.113	190.105	1.34722	0.6701	38876	220.381	0.740277	0.981197	0.823499	0.860482	0.0067142	0.0022706	0.740429	0.997519	SEKER
38148	700.346	240.678	202.096	1.19091	0.543058	38456	220.39	0.774296	0.991991	0.977364	0.915703	0.00630906	0.00273629	0.838512	0.998591	SEKER
38151	715.089	240.298	202.591	1.18612	0.537786	38724	220.398	0.777196	0.985203	0.937552	0.917187	0.0062986	0.00274951	0.841232	0.997806	SEKER
38153	705.654	236.478	205.659	1.14985	0.493619	38510	220.404	0.784912	0.99073	0.962842	0.932029	0.00619814	0.00288509	0.868678	0.998851	SEKER
38159	707.153	247.714	196.56	1.26025	0.608578	38483	220.421	0.7506	0.991581	0.958915	0.88982	0.00649164	0.0025104	0.79178	0.99784	SEKER
38159	701.909	243.54	199.754	1.2192	0.572062	38461	220.421	0.784487	0.992148	0.973297	0.905073	0.00638223	0.00264173	0.819158	0.998717	SEKER
38170	723.21	247.582	196.648	1.25901	0.607556	38617	220.453	0.769107	0.988425	0.917071	0.890426	0.00648629	0.00251517	0.792858	0.998214	SEKER
38171	707.456	233.946	208.039	1.12453	0.457396	38570	220.456	0.79318	0.989655	0.958395	0.942338	0.00612889	0.00298118	0.888001	0.99858	SEKER
38172	712.28	255.333	190.545	1.34001	0.665651	38486	220.459	0.744094	0.991841	0.945482	0.863418	0.00668901	0.00229311	0.74549	0.998964	SEKER
38179	719.145	250.863	194.005	1.29308	0.63398	38618	220.479	0.737673	0.988632	0.927687	0.878883	0.0065707	0.00241833	0.772435	0.998818	SEKER
38183	721.729	246.562	197.514	1.24833	0.598568	38626	220.491	0.798173	0.988531	0.921153	0.894262	0.00645736	0.00254738	0.799704	0.998293	SEKER
38185	713.378	228.187	213.455	1.06901	0.353483	38677	220.496	0.775361	0.987279	0.942895	0.966297	0.00597582	0.00321382	0.933731	0.998172	SEKER
38187	732.35	252.537	192.801	1.30983	0.645861	38625	220.502	0.788287	0.98866	0.894722	0.873148	0.00661316	0.00237105	0.762388	0.998602	SEKER
38190	706.192	250.178	194.688	1.28502	0.628019	38507	220.511	0.796987	0.991768	0.962308	0.881415	0.00655088	0.00243894	0.776892	0.998322	SEKER
38191	703.597	249.385	195.209	1.27753	0.622321	38438	220.514	0.778566	0.993574	0.969444	0.88423	0.00652994	0.00246235	0.781862	0.99885	SEKER
38192	706.381	251.309	193.929	1.29588	0.636017	38486	220.517	0.814346	0.992361	0.961843	0.877472	0.00658015	0.00240629	0.769956	0.997773	SEKER
38194	703.614	243.425	199.977	1.21726	0.570187	38483	220.522	0.769327	0.99249	0.969474	0.905917	0.00637337	0.0026479	0.820685	0.998989	SEKER
38195	719.457	243.286	200.212	1.21514	0.568113	38604	220.525	0.778536	0.989405	0.927271	0.906446	0.00636957	0.00265251	0.821644	0.998412	SEKER
38200	701.769	239.606	203.179	1.17929	0.530045	38503	220.54	0.758569	0.99213	0.974731	0.920425	0.00627241	0.00277696	0.847183	0.999073	SEKER
38210	705.63	236.731	205.916	1.14965	0.493349	38529	220.569	0.782158	0.991721	0.964346	0.931726	0.00619553	0.00288013	0.868114	0.998026	SEKER
38216	710.146	241.949	201.205	1.2025	0.555378	38542	220.586	0.776748	0.991542	0.952269	0.911703	0.0063311	0.00269819	0.831202	0.999524	SEKER
38217	713.032	242.911	200.552	1.21122	0.564233	38593	220.589	0.758274	0.990257	0.944601	0.908103	0.00635611	0.00266632	0.824652	0.998832	SEKER
38218	715.604	248.509	196.237	1.26637	0.61355	38565	220.592	0.76436	0.991002	0.937848	0.887661	0.0065024	0.00249025	0.787942	0.997829	SEKER
38220	709.411	253.531	192.26	1.31868	0.651869	38562	220.597	0.755919	0.991131	0.954343	0.870101	0.00663346	0.0023453	0.757077	0.998345	SEKER
38222	709.963	246.271	197.704	1.24566	0.596261	38555	220.603	0.780774	0.991363	0.95291	0.895776	0.00644316	0.00255903	0.802414	0.999531	SEKER
38222	715.843	246.223	198.212	1.24222	0.593263	38662	220.603	0.757937	0.988619	0.93732	0.895947	0.00644193	0.0025605	0.802721	0.997158	SEKER
38222	701.048	241.244	201.876	1.19501	0.547492	38491	220.603	0.79233	0.993011	0.9773	0.914441	0.00631165	0.00272235	0.836201	0.999272	SEKER
38233	709.54	239.67	203.324	1.17876	0.529438	38594	220.635	0.78311	0.990646	0.954321	0.920579	0.00626866	0.00277715	0.847466	0.998959	SEKER
38240	703.058	240.677	202.413	1.18904	0.541013	38518	220.655	0.783767	0.992783	0.972177	0.91681	0.00629385	0.00274293	0.840541	0.999437	SEKER
38241	709.687	237.387	206.327	1.15054	0.494534	38572	220.658	0.721556	0.991419	0.954125	0.929529	0.00620765	0.00285864	0.864025	0.994094	SEKER
38241	705.456	246.385	197.885	1.24509	0.595772	38534	220.658	0.781162	0.992396	0.965604	0.895583	0.00644295	0.00255675	0.802069	0.998649	SEKER
38273	710.319	248.514	196.36	1.26561	0.612934	38635	220.75	0.782999	0.99063	0.953225	0.88828	0.0064932	0.00249366	0.789041	0.998616	SEKER
38273	704.621	242.712	200.952	1.20781	0.560813	38580	220.75	0.790601	0.992043	0.968704	0.909514	0.00634161	0.00267681	0.827216	0.999122	SEKER
38276	706.425	242.763	200.956	1.20804	0.561043	38627	220.759	0.752813	0.990913	0.963839	0.909361	0.00634242	0.00267535	0.826938	0.998974	SEKER
38284	716.131	250.462	195.179	1.28324	0.626678	38694	220.782	0.783818	0.989404	0.938085	0.8815	0.0065422	0.00243665	0.777043	0.997132	SEKER
38285	709.287	247.614	197.327	1.25484	0.604093	38609	220.785	0.742331	0.991608	0.956301	0.89165	0.00646764	0.00252176	0.79504	0.997649	SEKER
38286	725.536	263.208	185.375	1.41987	0.709912	38646	220.788	0.735279	0.990685	0.91397	0.838835	0.00687478	0.00209963	0.703643	0.999082	SEKER
38290	708.533	244.958	199.239	1.22947	0.581762	38631	220.799	0.749799	0.991173	0.958462	0.901377	0.00639743	0.00260503	0.812481	0.998921	SEKER
38300	709.442	244.005	200.178	1.21894	0.571809	38656	220.828	0.778455	0.990791	0.956257	0.905016	0.00637088	0.00263635	0.819053	0.998374	SEKER
38303	704.69	245.045	199.25	1.22984	0.582103	38608	220.837	0.753699	0.9921	0.969274	0.901207	0.00639755	0.00260311	0.812175	0.998844	SEKER
38307	710.914	253.2	192.826	1.3131	0.648095	38617	220.848	0.780469	0.991972	0.952476	0.87223	0.00660975	0.00235988	0.760786	0.998984	SEKER
38331	702.785	237.598	205.928	1.15379	0.498816	38639	220.918	0.787974	0.992029	0.975248	0.929794	0.0061986	0.00285772	0.864516	0.997471	SEKER
38333	718.19	237.945	205.491	1.15794	0.504168	38776	220.923	0.785158	0.988575	0.933908	0.928464	0.00620731	0.0028454	0.862045	0.998193	SEKER
38338	718.737	247.109	197.705	1.24989	0.599904	38802	220.938	0.764131	0.988042	0.932608	0.89409	0.00644554	0.00254076	0.799396	0.999156	SEKER
38344	719.605	249.93	195.648	1.27745	0.622261	38741	220.955	0.778558	0.989752	0.930505	0.884066	0.00651811	0.00245607	0.781573	0.998421	SEKER
38347	705.936	245.572	199.192	1.23284	0.584856	38686	220.964	0.778019	0.991237	0.966965	0.899793	0.00640393	0.00258938	0.809627	0.998138	SEKER
38348	705.689	241.995	201.843	1.19893	0.551645	38638	220.966	0.771279	0.992494	0.967667	0.913102	0.00631051	0.00270596	0.833755	0.999612	SEKER
38354	715.527	253.61	192.816	1.31529	0.649588	38702	220.984	0.796304	0.991008	0.941388	0.871353	0.00661234	0.00235132	0.759257	0.998646	SEKER
38376	720.955	240.809	203.759	1.18183	0.532951	38872	221.047	0.725664	0.98724	0.927798	0.917937	0.00627498	0.00274817	0.842608	0.995819	SEKER
38377	706.076	245.342	199.355	1.23068	0.582879	38698	221.05	0.794325	0.991705	0.967337	0.900986	0.00639295	0.00259868	0.811776	0.999036	SEKER
38380	784.252	257.652	190.135	1.3551	0.674853	39006	221.059	0.775839	0.983951	0.784158	0.857974	0.00671319	0.0022439	0.736119	0.997515	SEKER
38396	709.443	250.38	195.739	1.27916	0.623572	38723	221.105	0.748431	0.991555	0.958652	0.883075	0.006521	0.00244616	0.779822	0.997513	SEKER
38407	703.703	245.251	199.626	1.22855	0.58091	38689	221.136	0.783816	0.992711	0.974634	0.901674	0.00638558	0.00260362	0.813015	0.99883	SEKER
38411	704.969	242.894	201.479	1.20556	0.558518	38707	221.148	0.766274	0.992353	0.971237	0.91047	0.00632356	0.00268043	0.828955	0.999353	SEKER
38426	718.102	248.374	197.254	1.25916	0.607681	38830	221.191	0.775781	0.989596	0.936403	0.890555	0.00646371	0.00250787	0.793088	0.998624	SEKER
38426	721.068	230.719	212.387	1.08631	0.39064	38886	221.191	0.777319	0.988171	0.928715	0.958702	0.00600425	0.00312877	0.91911	0.998443	SEKER
38426	709.22	244.389	200.507	1.21885	0.571729	38709	221.191	0.753052	0.992689	0.960004	0.905079	0.00635998	0.00263258	0.819168	0.998447	SEKER
38426	711.412	246.697	198.556	1.24246	0.593467	38799	221.191	0.752094	0.990386	0.954097	0.896612	0.00642004	0.00255939	0.803913	0.998826	SEKER
38438	706.251	244.915	200.071	1.22414	0.576782	38751	221.226	0.75591	0.991923	0.968395	0.903276	0.00637169	0.00261647	0.815907	0.998786	SEKER
38445	705.779	235.183	208.474	1.12811	0.462854	38763	221.246	0.76967	0.991796	0.969867	0.940741	0.00611738	0.00295546	0.884993	0.998374	SEKER
38457	710.385	240.696	203.77	1.18121	0.532252	38801	221.28	0.778986	0.991134	0.95763	0.919333	0.00625885	0.00275782	0.845174	0.998332	SEKER
38463	714.965	228.508	214.512	1.06525	0.344601	38878	221.298	0.79142	0.989326	0.945548	0.968444	0.00594099	0.00322357	0.937884	0.999078	SEKER
38472	734.036	251.05	195.389	1.28487	0.627909	38999	221.323	0.753467	0.986487	0.897263	0.88159	0.00652553	0.00243144	0.777201	0.998605	SEKER
38475	708.856	250.1	196.037	1.27578	0.620971	38772	221.332	0.764758	0.99234	0.962216	0.884975	0.00650032	0.00245946	0.783181	0.999168	SEKER
38487	711.559	255.004	192.353	1.32571	0.656515	38835	221.367	0.791327	0.991039	0.955217	0.868091	0.00662571	0.00232099	0.753582	0.999032	SEKER
38489	707.978	244.119	200.95	1.21483	0.567805	38782	221.372	0.788871	0.992445	0.964955	0.90682	0.00634258	0.00264563	0.822322	0.998979	SEKER
38493	728.181	243.003	201.955	1.20325	0.556153	38990	221.384	0.750761	0.987253	0.912248	0.911035	0.0063129	0.00268256	0.829985	0.998682	SEKER
38495	797.002	250.954	195.951	1.2807	0.624752	39373	221.39	0.76543	0.9777	0.761545	0.882192	0.00651913	0.00243569	0.778263	0.996721	SEKER
38495	714.189	249.515	196.659	1.26877	0.615463	38855	221.39	0.770856	0.990735	0.948392	0.887281	0.00648174	0.00247809	0.787268	0.998862	SEKER
38511	711.884	248.385	197.777	1.25588	0.604965	38826	221.436	0.764289	0.991887	0.95494	0.891503	0.00644971	0.00251311	0.794778	0.998149	SEKER
38511	711.112	249.655	196.627	1.26968	0.61619	38797	221.436	0.805029	0.992628	0.957015	0.886968	0.00648268	0.00247495	0.786712	0.998875	SEKER
38512	710.718	246.212	199.448	1.23447	0.586337	38880	221.438	0.757663	0.990535	0.958101	0.899383	0.00639311	0.0025803	0.808889	0.998546	SEKER
38518	716.158	244.177	201.161	1.21384	0.56683	38895	221.456	0.750897	0.990307	0.943748	0.906948	0.00633929	0.00264576	0.822555	0.998447	SEKER
38533	719.241	251.818	195.159	1.29032	0.631961	38942	221.499	0.784147	0.989497	0.936039	0.879598	0.00653513	0.00241308	0.773693	0.998314	SEKER
38542	723.764	254.712	192.901	1.32043	0.653032	38941	221.525	0.786571	0.989754	0.924592	0.869708	0.00660868	0.00233232	0.756392	0.99876	SEKER
38543	717.555	254.976	192.935	1.32156	0.653783	38878	221.528	0.783394	0.991383	0.940687	0.868819	0.00661535	0.00232515	0.754847	0.997574	SEKER
38548	704.398	242.203	202.969	1.1933	0.545653	38857	221.542	0.783751	0.992048	0.976282	0.914696	0.00628315	0.00271309	0.836668	0.998398	SEKER
38550	714.519	238.485	206.138	1.15692	0.502865	38916	221.548	0.792036	0.990595	0.94887	0.928979	0.00618639	0.0028421	0.863001	0.998422	SEKER
38552	714.493	234.997	209.033	1.12421	0.456913	38959	221.553	0.801664	0.989553	0.948988	0.942792	0.00609559	0.0029707	0.888857	0.999265	SEKER
38554	702.846	244.616	200.913	1.21752	0.570438	38816	221.559	0.76496	0.99325	0.980751	0.905744	0.00634475	0.002634	0.820372	0.998821	SEKER
38554	709.931	252.797	194.469	1.29994	0.638926	38842	221.559	0.773866	0.992585	0.961274	0.876431	0.00655696	0.00238645	0.768131	0.998522	SEKER
38559	741.248	249.168	197.848	1.25939	0.607876	39182	221.574	0.77118	0.9841	0.881878	0.889253	0.006462	0.00249257	0.790771	0.995893	SEKER
38559	715.718	232.602	211.4	1.10029	0.417127	39012	221.574	0.76849	0.988388	0.945914	0.952587	0.00603236	0.00306398	0.907422	0.998431	SEKER
38567	707.74	245.28	200.678	1.22226	0.574994	38880	221.597	0.779509	0.99195	0.967561	0.903442	0.00635985	0.00261353	0.816208	0.997617	SEKER
38577	728.126	243.877	201.644	1.20944	0.562458	38948	221.625	0.782685	0.990474	0.914377	0.908758	0.00632183	0.00265959	0.825841	0.998809	SEKER
38579	716.173	244.754	201.076	1.21722	0.570147	39039	221.631	0.797944	0.988217	0.945203	0.905526	0.00634423	0.00263125	0.819977	0.998094	SEKER
38581	709.625	234.033	210.329	1.1127	0.438531	38948	221.637	0.779792	0.990577	0.962777	0.947033	0.00606601	0.00300984	0.896871	0.997948	SEKER
38591	715.273	254.473	193.221	1.317	0.650741	38926	221.665	0.790734	0.991394	0.947878	0.871076	0.00659411	0.00234185	0.758773	0.999306	SEKER
38594	725.607	261.244	188.315	1.38727	0.693103	38974	221.674	0.80859	0.99025	0.921142	0.848534	0.00676902	0.00216463	0.72001	0.99885	SEKER
38594	708.534	246.144	199.842	1.2317	0.583812	38925	221.674	0.765936	0.991496	0.966069	0.900587	0.00637778	0.00258792	0.811056	0.998974	SEKER
38600	716.517	254.129	193.992	1.31	0.645976	38940	221.691	0.715265	0.991269	0.944809	0.872356	0.00658366	0.00235192	0.761006	0.996919	SEKER
38602	712.975	246.957	199.232	1.23954	0.590896	38979	221.697	0.751597	0.990328	0.95427	0.897715	0.00639752	0.00256298	0.805892	0.998939	SEKER
38609	710.915	248.68	197.975	1.25612	0.60516	38911	221.717	0.77382	0.992239	0.959982	0.891575	0.00644099	0.00251053	0.794906	0.998496	SEKER
38613	712.049	252.232	195.601	1.28952	0.63137	38925	221.729	0.766587	0.991985	0.957026	0.879067	0.0065323	0.00240621	0.772758	0.996489	SEKER
38618	706.341	241.865	203.534	1.18832	0.540224	38913	221.743	0.791482	0.992419	0.972682	0.916805	0.00626301	0.00272942	0.840531	0.998824	SEKER
38625	724.328	241.448	203.976	1.18371	0.535075	39111	221.763	0.769928	0.987574	0.925141	0.918471	0.00625108	0.00274408	0.84359	0.998562	SEKER
38627	715.538	254.514	193.625	1.31446	0.649026	38930	221.769	0.773329	0.992217	0.948059	0.871343	0.00658901	0.00234292	0.759239	0.997993	SEKER
38628	720.599	251.416	196.679	1.27831	0.622924	39014	221.772	0.740255	0.990106	0.934813	0.88209	0.00650866	0.00243065	0.778082	0.994631	SEKER
38631	710.756	236.003	208.604	1.13135	0.467674	39019	221.78	0.786542	0.990056	0.960959	0.939734	0.00610917	0.00293888	0.8831	0.999094	SEKER
38641	718.184	247.747	198.85	1.2459	0.596474	39027	221.809	0.753207	0.990109	0.941427	0.895305	0.0064115	0.00254111	0.801572	0.998678	SEKER
38642	723.426	236.465	208.295	1.13524	0.473359	39103	221.812	0.767011	0.988211	0.927857	0.938033	0.00611938	0.00292253	0.879905	0.998905	SEKER
38650	705.316	246.212	200.147	1.23016	0.5824	38932	221.835	0.784373	0.992757	0.976319	0.90099	0.00637031	0.00258952	0.811783	0.998623	SEKER
38653	713.967	250.196	196.973	1.27021	0.616603	38972	221.843	0.772303	0.991815	0.952877	0.88668	0.00647286	0.002468	0.786202	0.998638	SEKER
38669	721.004	248.332	198.762	1.24939	0.599483	39053	221.889	0.7407	0.990167	0.934754	0.893521	0.00642198	0.00252503	0.798379	0.99749	SEKER
38670	711.562	245.521	200.805	1.22269	0.5754	39010	221.892	0.763626	0.991284	0.959751	0.903759	0.00634915	0.0026128	0.81678	0.998665	SEKER
38677	741.296	257.007	191.813	1.33988	0.665572	39266	221.912	0.776896	0.985	0.884462	0.863448	0.00664497	0.00227833	0.745542	0.998939	SEKER
38677	710.617	248.831	198.075	1.25624	0.605264	38972	221.912	0.774299	0.99243	0.962479	0.89182	0.00643356	0.00251039	0.795344	0.999144	SEKER
38692	706.244	234.596	210.199	1.11607	0.444051	38959	221.955	0.767729	0.993147	0.974813	0.946116	0.00606318	0.0029968	0.895135	0.999033	SEKER
38695	713.214	244.532	201.701	1.21235	0.565361	39019	221.964	0.773591	0.991696	0.955928	0.907708	0.00631948	0.00264634	0.823934	0.998897	SEKER
38701	718.151	248.235	199.679	1.24317	0.594094	39125	221.981	0.7646	0.989163	0.942976	0.894239	0.00641417	0.00253008	0.799663	0.994116	SEKER
38702	705.036	240.769	204.909	1.175	0.525066	38966	221.984	0.774799	0.993225	0.97841	0.921981	0.00622109	0.0027729	0.850049	0.998811	SEKER
38702	714.602	251.906	195.896	1.28591	0.628689	39018	221.984	0.793009	0.991901	0.95239	0.881218	0.00650886	0.00242113	0.776545	0.998571	SEKER
38702	708.716	251.235	196.43	1.279	0.623457	39004	221.984	0.751072	0.992257	0.968275	0.883572	0.00649152	0.00244058	0.780699	0.998518	SEKER
38713	711.163	242.96	203.049	1.19656	0.549139	39057	222.016	0.771929	0.991192	0.961897	0.913795	0.00627593	0.00269931	0.83502	0.99915	SEKER
38723	716.994	254.291	194.563	1.30699	0.64389	39073	222.044	0.755232	0.991042	0.946559	0.873189	0.00656693	0.00235492	0.762459	0.996525	SEKER
38727	711.247	245.083	201.803	1.21447	0.567453	39004	222.056	0.749144	0.992898	0.962017	0.906043	0.00632848	0.00263072	0.820915	0.996975	SEKER
38729	727.147	240.519	205.213	1.17205	0.521572	39234	222.061	0.782784	0.987129	0.920453	0.92326	0.00621031	0.00278348	0.852408	0.999064	SEKER
38746	714.422	250.539	197.055	1.27142	0.617562	39096	222.11	0.767917	0.991048	0.953953	0.886529	0.0064662	0.00246377	0.785933	0.999251	SEKER
38747	704.737	245.542	201.23	1.2202	0.573029	39008	222.113	0.791886	0.993309	0.980379	0.904583	0.00633706	0.00261734	0.81827	0.998456	SEKER
38760	709.626	247.174	199.979	1.236	0.587725	39056	222.15	0.769521	0.992421	0.967241	0.898762	0.00637703	0.00256671	0.807773	0.998408	SEKER
38768	717.447	245.13	201.574	1.21608	0.569035	39165	222.173	0.76939	0.989863	0.946463	0.906348	0.006323	0.00263199	0.821467	0.998971	SEKER
38771	716.198	249.348	198.171	1.25824	0.606927	39156	222.182	0.782115	0.990168	0.94984	0.891052	0.0064313	0.00250087	0.793973	0.999013	SEKER
38776	711.692	242.084	204.086	1.18619	0.537857	39108	222.196	0.77521	0.991511	0.96203	0.917847	0.00624314	0.00273316	0.842444	0.999297	SEKER
38792	718.64	242.782	203.602	1.19243	0.544716	39186	222.242	0.760986	0.989945	0.943907	0.915399	0.00625855	0.00271078	0.837955	0.999205	SEKER
38794	721.177	254.061	194.613	1.30546	0.642827	39179	222.248	0.779779	0.990173	0.937326	0.874782	0.00654897	0.00236566	0.765243	0.998997	SEKER
38795	715.694	249.872	197.902	1.2626	0.610501	39140	222.251	0.800871	0.991185	0.951767	0.889459	0.00644082	0.0024867	0.791137	0.99889	SEKER
38798	716.355	251.719	196.491	1.28107	0.625034	39139	222.259	0.79254	0.991287	0.950085	0.882966	0.00648793	0.00243255	0.779629	0.998759	SEKER
38800	721.457	248.267	199.378	1.24521	0.595874	39236	222.265	0.774513	0.988888	0.936743	0.895264	0.00639865	0.00253555	0.801498	0.998033	SEKER
38802	707.093	245.751	201.24	1.22119	0.573973	39092	222.271	0.791958	0.992582	0.975239	0.904453	0.00633347	0.00261436	0.818035	0.998975	SEKER
38807	711.716	245.518	201.724	1.2171	0.570024	39161	222.285	0.791527	0.99096	0.962734	0.905373	0.00632663	0.00262218	0.8197	0.997654	SEKER
38807	722.477	251.352	197.065	1.27548	0.620734	39200	222.285	0.754883	0.989974	0.934269	0.884359	0.00647696	0.0024438	0.782091	0.997537	SEKER
38814	717.913	254.345	194.543	1.3074	0.644175	39196	222.305	0.745993	0.990254	0.946356	0.874028	0.00655293	0.00235894	0.763925	0.998753	SEKER
38819	730.463	249.177	198.967	1.25236	0.602002	39314	222.319	0.780281	0.987409	0.914235	0.892213	0.00641896	0.0025091	0.796044	0.996931	SEKER
38823	724.18	255.192	193.784	1.31689	0.650666	39221	222.331	0.748568	0.989852	0.930263	0.871229	0.00657322	0.00233608	0.759041	0.999574	SEKER
38825	721.732	249.281	198.616	1.25509	0.604305	39189	222.337	0.760201	0.990712	0.936633	0.89191	0.00642064	0.00250635	0.795503	0.998432	SEKER
38830	710.511	249.025	198.75	1.25296	0.60251	39153	222.351	0.765123	0.99175	0.966575	0.892885	0.00641322	0.00251442	0.797243	0.998912	SEKER
38830	724.363	253.496	195.343	1.2977	0.637323	39225	222.351	0.761193	0.98993	0.929961	0.877138	0.00652835	0.00238372	0.769372	0.998411	SEKER
38834	713.685	248.809	198.817	1.25145	0.601233	39151	222.362	0.772601	0.991903	0.958096	0.893708	0.00640698	0.00252125	0.798714	0.99955	SEKER
38837	715.528	253.292	195.382	1.29639	0.636386	39154	222.371	0.787961	0.991904	0.95324	0.877922	0.00652193	0.0023899	0.770747	0.999192	SEKER
38838	711.171	244.239	202.897	1.20376	0.556675	39190	222.374	0.787853	0.991018	0.964981	0.910475	0.00628867	0.0026657	0.828965	0.997874	SEKER
38841	721.773	257.906	191.963	1.34352	0.667831	39169	222.382	0.787147	0.991626	0.936912	0.862261	0.00664004	0.00226416	0.743495	0.9989	SEKER
38844	708.154	246.912	200.533	1.23128	0.583427	39120	222.391	0.78047	0.992945	0.973371	0.90069	0.0063565	0.00258047	0.811242	0.998863	SEKER
38845	710.022	242.848	203.979	1.19056	0.542674	39162	222.394	0.769086	0.991905	0.968281	0.915774	0.00625172	0.00271226	0.838641	0.99845	SEKER
38848	709.386	245.782	201.947	1.21706	0.569991	39160	222.402	0.774235	0.992033	0.970093	0.904875	0.00632677	0.00261647	0.818799	0.996529	SEKER
38848	719.237	260.744	189.982	1.37247	0.684924	39210	222.402	0.728077	0.990768	0.943701	0.852953	0.0067119	0.00219142	0.727529	0.998511	SEKER
38852	716.903	252.085	197.162	1.27857	0.623123	39209	222.414	0.744291	0.990895	0.949954	0.882297	0.00648834	0.00242534	0.778447	0.9953	SEKER
38854	714.487	241.105	205.415	1.17375	0.523587	39202	222.42	0.786932	0.991123	0.956438	0.922501	0.00620541	0.00277216	0.851009	0.998869	SEKER
38855	727.362	255.88	193.438	1.3228	0.654604	39228	222.422	0.7898	0.990491	0.922902	0.869244	0.00658552	0.00231919	0.755585	0.999487	SEKER
38865	711.966	250.408	197.81	1.2659	0.613169	39179	222.451	0.762134	0.991986	0.963496	0.888353	0.00644303	0.00247521	0.789172	0.999012	SEKER
38866	727.944	250.823	197.634	1.26913	0.615751	39268	222.454	0.754914	0.989763	0.921688	0.886896	0.00645353	0.00246302	0.786585	0.998279	SEKER
38867	719.796	251.854	196.74	1.28013	0.624319	39272	222.457	0.781843	0.989687	0.942697	0.883278	0.00647988	0.00243297	0.78018	0.998734	SEKER
38871	717.084	260.507	190.162	1.36992	0.683481	39136	222.468	0.774323	0.993229	0.949939	0.853981	0.00670184	0.0021987	0.729283	0.999061	SEKER
38886	716.01	243.28	203.949	1.19285	0.545166	39295	222.511	0.742425	0.989592	0.953158	0.914629	0.00625624	0.00270068	0.836546	0.997874	SEKER
38887	710.41	246.818	201.019	1.22784	0.580247	39248	222.514	0.808277	0.990802	0.968269	0.901531	0.00634706	0.00258627	0.812757	0.997933	SEKER
38888	711.477	244.822	202.419	1.20949	0.562499	39192	222.517	0.793714	0.992243	0.965392	0.908891	0.00629557	0.0026501	0.826083	0.999135	SEKER
38890	718.332	243.013	204.093	1.1907	0.542826	39276	222.523	0.758149	0.990172	0.947103	0.915682	0.00624872	0.00270988	0.838474	0.998367	SEKER
38896	726.873	241.084	205.758	1.17169	0.521142	39321	222.54	0.782175	0.989192	0.925119	0.923079	0.00619817	0.00277587	0.852076	0.998366	SEKER
38897	708.832	248.955	199.059	1.25066	0.60056	39175	222.543	0.76408	0.992904	0.972835	0.893907	0.00640037	0.00252089	0.799069	0.999361	SEKER
38898	728.258	255.203	194.619	1.3113	0.646867	39279	222.545	0.738523	0.9903	0.921651	0.872033	0.00656083	0.00234029	0.760441	0.997165	SEKER
38899	720.474	254.551	194.962	1.30564	0.642951	39215	222.548	0.762322	0.991942	0.941698	0.874279	0.00654388	0.00235839	0.764364	0.997985	SEKER
38927	716.92	243.513	203.761	1.19509	0.547576	39284	222.628	0.752154	0.990912	0.951742	0.914238	0.00625562	0.00269579	0.83583	0.998894	SEKER
38928	717.454	252.306	196.676	1.28285	0.626385	39271	222.631	0.801713	0.991266	0.950351	0.882387	0.00648135	0.00242371	0.778606	0.998835	SEKER
38929	715.093	247.637	200.47	1.23528	0.587075	39229	222.634	0.750308	0.992353	0.956661	0.899033	0.00636125	0.00256345	0.808261	0.998429	SEKER
38934	708.524	242.491	204.711	1.18455	0.53603	39207	222.648	0.795351	0.993037	0.974608	0.91817	0.00622827	0.00273048	0.843036	0.998622	SEKER
38938	781.143	241.335	205.877	1.17223	0.52179	39426	222.66	0.788139	0.987622	0.801904	0.922616	0.00619794	0.0027702	0.851221	0.997828	SEKER
38940	715.812	241.577	205.474	1.1757	0.525887	39325	222.666	0.769185	0.99021	0.95501	0.921717	0.00620382	0.00276204	0.849563	0.998834	SEKER
38944	712.513	248.523	199.83	1.24367	0.594531	39279	222.677	0.761071	0.991471	0.963973	0.896003	0.00638154	0.00253713	0.802821	0.998443	SEKER
38945	718.24	241.878	205.265	1.17837	0.528988	39299	222.68	0.783917	0.990992	0.948686	0.920628	0.00621076	0.00275209	0.847557	0.998736	SEKER
38959	718.457	258.542	192.143	1.34557	0.669095	39336	222.72	0.772996	0.990416	0.948454	0.861445	0.00663626	0.00225431	0.742088	0.998534	SEKER
38971	716.507	249.88	199.058	1.25531	0.604488	39315	222.754	0.754915	0.99125	0.953917	0.891445	0.00641195	0.00249774	0.794674	0.997565	SEKER
38974	717.63	245.886	202.119	1.21654	0.569482	39309	222.763	0.761033	0.991478	0.951007	0.905961	0.00630896	0.00262166	0.820765	0.998493	SEKER
38976	716.184	257.744	192.812	1.33677	0.663617	39281	222.768	0.768939	0.992235	0.9549	0.8643	0.0066129	0.0022763	0.747014	0.998585	SEKER
38986	713.852	244.306	203.532	1.20033	0.553116	39300	222.797	0.776335	0.99201	0.961396	0.911959	0.00626651	0.00267366	0.831668	0.998277	SEKER
38988	713.031	239.831	207.258	1.15716	0.503181	39351	222.803	0.782577	0.990775	0.96366	0.928998	0.00615141	0.00282627	0.863037	0.998676	SEKER
38990	720.442	235.313	211.142	1.11448	0.44146	39379	222.808	0.763746	0.990122	0.943985	0.946858	0.00603523	0.00299235	0.89654	0.999175	SEKER
38997	719.366	251.66	197.486	1.27432	0.619837	39347	222.828	0.784679	0.991105	0.946981	0.885433	0.00645333	0.00244673	0.783991	0.999058	SEKER
39014	709.353	241.775	205.654	1.17564	0.525813	39295	222.877	0.762439	0.992849	0.974329	0.921836	0.00619714	0.00276049	0.849782	0.999038	SEKER
39023	711.172	248.191	200.432	1.23828	0.589773	39313	222.903	0.783594	0.992623	0.969575	0.898108	0.00636013	0.00255247	0.806598	0.998798	SEKER
39034	707.518	241.305	206.284	1.16977	0.518848	39306	222.934	0.770388	0.99308	0.979891	0.923867	0.00618193	0.00277806	0.85353	0.998436	SEKER
39037	712.794	250.782	198.444	1.26374	0.611427	39368	222.943	0.741443	0.991592	0.965513	0.888989	0.00642422	0.00247506	0.790302	0.998738	SEKER
39040	717.134	248.732	200.084	1.24314	0.594065	39366	222.951	0.754746	0.991719	0.953936	0.896351	0.00637121	0.00253696	0.803445	0.998792	SEKER
39052	711.179	244.516	203.602	1.20095	0.55376	39399	222.986	0.791039	0.991193	0.970276	0.911948	0.00626128	0.00267131	0.83165	0.998767	SEKER
39059	724.031	250.637	199.001	1.25948	0.607943	39468	223.006	0.763677	0.989637	0.936304	0.889755	0.00641688	0.00248076	0.791664	0.997082	SEKER
39064	717.191	247.849	200.904	1.23367	0.585612	39399	223.02	0.762284	0.991497	0.95437	0.899821	0.00634469	0.00256576	0.809679	0.998874	SEKER
39070	715.415	251.973	197.727	1.27435	0.619859	39403	223.037	0.769155	0.991549	0.959262	0.885161	0.00644928	0.00244219	0.783509	0.998466	SEKER
39073	727.356	249.151	200.237	1.24428	0.595066	39539	223.045	0.762073	0.988214	0.928095	0.895221	0.00637656	0.00252631	0.80142	0.997192	SEKER
39074	781.022	253.704	196.818	1.28903	0.631004	39744	223.048	0.728612	0.983142	0.804954	0.879168	0.00649291	0.0023928	0.772936	0.996335	SEKER
39082	719.5	247.516	201.459	1.22862	0.580976	39529	223.071	0.749329	0.988692	0.948692	0.901239	0.00633325	0.00257731	0.812232	0.997925	SEKER
39085	708.873	246.336	202.298	1.21769	0.570603	39341	223.08	0.777594	0.993493	0.977424	0.905591	0.00630257	0.00261472	0.820095	0.998623	SEKER
39087	716.009	253.834	196.495	1.29181	0.633055	39382	223.085	0.782507	0.992509	0.958088	0.878863	0.00649408	0.00238991	0.7724	0.997795	SEKER
39088	719.97	254.246	195.923	1.29768	0.637314	39470	223.088	0.783421	0.990322	0.947599	0.877452	0.00650444	0.00237839	0.769922	0.999114	SEKER
39091	717.854	248.13	200.733	1.23612	0.587832	39454	223.097	0.745556	0.990799	0.953267	0.899113	0.0063475	0.00255881	0.808404	0.999284	SEKER
39099	730.036	247.734	201.333	1.23047	0.582688	39497	223.12	0.742508	0.989923	0.921907	0.90064	0.00633608	0.00257162	0.811153	0.998102	SEKER
39101	727.736	245.27	203.539	1.20503	0.557976	39601	223.125	0.753348	0.987374	0.927791	0.909714	0.00627272	0.00265006	0.82758	0.997256	SEKER
39102	715.945	254.585	195.93	1.29937	0.638519	39444	223.128	0.751933	0.991329	0.958627	0.876441	0.00651078	0.00236975	0.768148	0.998105	SEKER
39104	714.999	249.007	200.194	1.24383	0.594668	39434	223.134	0.795557	0.991632	0.961214	0.896096	0.00636781	0.00253273	0.802988	0.998777	SEKER
39108	717.398	256.096	194.82	1.31453	0.64907	39413	223.145	0.787721	0.992261	0.954894	0.871333	0.00654844	0.00232839	0.759222	0.998018	SEKER
39122	725.817	245.372	203.206	1.20751	0.560503	39532	223.185	0.790775	0.989629	0.933204	0.909578	0.00627198	0.00264816	0.827331	0.999009	SEKER
39122	711.642	241.643	206.459	1.17041	0.519617	39447	223.185	0.791687	0.991761	0.970751	0.923618	0.00617664	0.00277269	0.85307	0.998444	SEKER
39123	714.166	246.146	202.572	1.2151	0.568075	39456	223.188	0.771748	0.99156	0.963926	0.906731	0.00629159	0.00262334	0.822162	0.99901	SEKER
39124	714.589	250.901	198.847	1.26177	0.609827	39451	223.191	0.768584	0.991711	0.96281	0.88956	0.00641296	0.00247707	0.791317	0.998463	SEKER
39139	714.71	254.912	195.704	1.30254	0.640773	39431	223.234	0.794088	0.992595	0.962853	0.875729	0.00651299	0.00236287	0.766901	0.99892	SEKER
39141	713.315	254	196.537	1.29238	0.633473	39440	223.239	0.760758	0.992419	0.966672	0.878894	0.00648937	0.00238852	0.772455	0.998307	SEKER
39141	711.099	249.162	200.206	1.24453	0.595279	39419	223.239	0.759341	0.992948	0.972706	0.895961	0.00636575	0.00253039	0.802747	0.999039	SEKER
39145	716.674	252.795	197.731	1.27848	0.623053	39458	223.251	0.765208	0.992068	0.957729	0.883132	0.0064579	0.00242311	0.779922	0.997113	SEKER
39152	721.127	243.775	204.8	1.19031	0.542406	39565	223.271	0.78745	0.989561	0.946107	0.915888	0.00622638	0.00270262	0.838851	0.998494	SEKER
39158	727.678	243.028	205.664	1.18167	0.532774	39634	223.288	0.763314	0.98799	0.929291	0.918776	0.00620633	0.00272806	0.84415	0.997509	SEKER
39159	725.519	257.183	194.083	1.32512	0.656127	39528	223.291	0.753928	0.990665	0.934854	0.868218	0.00656765	0.002302	0.753803	0.998877	SEKER
39160	731.796	261.634	190.717	1.37184	0.684571	39585	223.294	0.747257	0.989264	0.918909	0.853458	0.00668115	0.00218655	0.728391	0.999237	SEKER
39175	719.195	259.159	192.869	1.34371	0.667947	39457	223.336	0.756391	0.992853	0.951756	0.861772	0.00661543	0.00225065	0.742652	0.997908	SEKER
39180	709.775	243.845	204.65	1.19152	0.543721	39457	223.351	0.757306	0.99298	0.977311	0.915955	0.0062237	0.00270225	0.838974	0.999652	SEKER
39183	721.153	254.159	196.59	1.29284	0.633806	39567	223.359	0.753766	0.990295	0.946788	0.878816	0.00648646	0.00238661	0.772318	0.998483	SEKER
39188	713.669	247.428	201.775	1.22626	0.578771	39536	223.373	0.763958	0.991198	0.966873	0.902781	0.00631388	0.00258705	0.815013	0.999415	SEKER
39192	709.658	242.16	206.386	1.17334	0.5231	39464	223.385	0.782979	0.993108	0.977933	0.922467	0.00617882	0.00275987	0.850945	0.998444	SEKER
39195	738.413	249.885	199.832	1.25048	0.60041	39617	223.393	0.75404	0.989348	0.90332	0.893983	0.00637544	0.00251193	0.799206	0.999392	SEKER
39198	717.099	238.311	210.123	1.13415	0.471773	39556	223.402	0.79768	0.99095	0.95789	0.937439	0.00607967	0.00289623	0.878792	0.99668	SEKER
39202	723.947	250.426	199.541	1.25501	0.604234	39642	223.413	0.783272	0.988901	0.93995	0.892133	0.0063881	0.00249614	0.795901	0.998862	SEKER
39208	713.397	251.59	198.611	1.26675	0.613849	39469	223.43	0.776396	0.993387	0.968104	0.888073	0.00641681	0.00246203	0.788674	0.99905	SEKER
39215	709.517	244.516	204.727	1.19435	0.546784	39488	223.45	0.773243	0.993087	0.978896	0.913849	0.00623526	0.00268245	0.83512	0.997427	SEKER
39215	721.759	257.149	194.537	1.32185	0.653978	39711	223.45	0.738679	0.98751	0.945971	0.868953	0.00655741	0.00230621	0.75508	0.998105	SEKER
39224	715.918	247.4	202.196	1.22356	0.576234	39565	223.476	0.778439	0.991381	0.96169	0.9033	0.00630735	0.00259033	0.815951	0.998368	SEKER
39227	726.769	265.018	188.723	1.40427	0.702065	39595	223.485	0.739853	0.990706	0.933259	0.843282	0.006756	0.00210746	0.711124	0.998611	SEKER
39234	715.421	256.645	194.962	1.31639	0.650327	39502	223.505	0.793087	0.993216	0.963272	0.87087	0.0065414	0.00232093	0.758414	0.998367	SEKER
39245	713.933	242.414	206.44	1.17426	0.524189	39588	223.536	0.779134	0.991336	0.967563	0.922125	0.00617693	0.00275494	0.850315	0.998489	SEKER
39246	715.008	247.482	202.102	1.22454	0.577157	39569	223.539	0.778876	0.991837	0.96468	0.903253	0.00630591	0.0025892	0.815866	0.999061	SEKER
39257	723.526	255.081	196.3	1.29944	0.638574	39588	223.57	0.760456	0.991639	0.942364	0.876468	0.00649771	0.00236529	0.768196	0.998227	SEKER
39261	714.215	243.405	205.563	1.18409	0.535512	39589	223.581	0.779468	0.991715	0.967193	0.918555	0.00619968	0.00272251	0.843744	0.999072	SEKER
39263	742.362	259.617	193.875	1.33909	0.665078	39768	223.587	0.781587	0.987301	0.895286	0.861219	0.00661226	0.0022438	0.741698	0.993203	SEKER
39273	729.415	253.796	197.527	1.28487	0.627904	39696	223.616	0.75354	0.989344	0.927587	0.881083	0.00646236	0.00240236	0.776308	0.997452	SEKER
39276	720.452	260.477	192.237	1.35498	0.67478	39597	223.624	0.7457	0.991893	0.950883	0.858519	0.00663196	0.00222239	0.737054	0.998693	SEKER
39276	725.636	258.233	193.955	1.33141	0.660208	39601	223.624	0.773988	0.991793	0.937345	0.865977	0.00657484	0.00228081	0.749916	0.998446	SEKER
39277	720.153	256.996	194.867	1.31883	0.651967	39599	223.627	0.772774	0.991868	0.951697	0.870157	0.00654317	0.00231398	0.757173	0.998583	SEKER
39282	750.197	269.851	185.82	1.45222	0.72514	39865	223.641	0.70901	0.985376	0.877107	0.828758	0.00686959	0.00199904	0.686839	0.997441	SEKER
39285	727.629	245.87	203.657	1.20728	0.560268	39709	223.65	0.755771	0.989322	0.932431	0.909627	0.00625862	0.00264308	0.82742	0.998924	SEKER
39285	727.618	252.352	198.756	1.26965	0.616165	39686	223.65	0.784508	0.989896	0.932459	0.886263	0.00642361	0.00244461	0.785462	0.997263	SEKER
39288	723.891	259.446	193.036	1.34403	0.668147	39616	223.658	0.752759	0.991721	0.942157	0.86206	0.00660371	0.00224966	0.743147	0.998815	SEKER
39295	732.803	244.199	205.471	1.18848	0.540399	39881	223.678	0.80539	0.985306	0.919544	0.915967	0.00621451	0.00269839	0.838995	0.997131	SEKER
39301	729.001	250.592	200.08	1.25246	0.602086	39776	223.695	0.764968	0.988058	0.929303	0.892669	0.00637621	0.00249749	0.796858	0.99803	SEKER
39306	724.304	252.646	198.356	1.2737	0.619352	39704	223.71	0.753104	0.989976	0.941514	0.885465	0.00642768	0.00243736	0.784049	0.998644	SEKER
39313	714.895	243.994	205.457	1.18756	0.539384	39634	223.729	0.769907	0.991901	0.966633	0.916948	0.00620644	0.00270645	0.840793	0.998495	SEKER
39323	747.5	249.569	200.935	1.24203	0.593098	39924	223.758	0.768688	0.984946	0.88437	0.896579	0.00634663	0.00252975	0.803854	0.998415	SEKER
39325	719.707	251.612	199.397	1.26186	0.609898	39710	223.764	0.776376	0.990305	0.954041	0.889322	0.00639826	0.00246875	0.790893	0.997998	SEKER
39330	724.501	245.147	204.448	1.19907	0.551797	39743	223.778	0.786285	0.989608	0.941577	0.91283	0.00623309	0.00266957	0.833258	0.999136	SEKER
39334	714.221	241.041	208.225	1.1576	0.503735	39735	223.789	0.801296	0.989908	0.968975	0.928427	0.00612806	0.00280863	0.861977	0.997823	SEKER
39336	722.8	260.645	192.368	1.35493	0.674753	39664	223.795	0.775858	0.991731	0.946158	0.858619	0.00662612	0.00222147	0.737226	0.998892	SEKER
39336	729.453	236.728	211.675	1.11836	0.447732	39808	223.795	0.780941	0.988143	0.928978	0.945365	0.00601811	0.0029651	0.893716	0.999494	SEKER
39339	721.525	250.348	200.327	1.2497	0.599741	39685	223.803	0.778928	0.991281	0.949577	0.89397	0.00636386	0.00250722	0.799182	0.998735	SEKER
39341	732.772	262.048	191.557	1.36799	0.682378	39772	223.809	0.768139	0.989163	0.920699	0.854076	0.00666094	0.00218626	0.729446	0.997875	SEKER
39343	716.234	250.622	200.334	1.25102	0.600868	39669	223.815	0.744076	0.991782	0.963757	0.893037	0.00637018	0.00249925	0.797516	0.997707	SEKER
39364	714.687	249.382	201.18	1.2396	0.590944	39692	223.875	0.784769	0.991736	0.96845	0.897717	0.00633529	0.00253807	0.805895	0.998987	SEKER
39366	724.816	254.749	196.952	1.29346	0.634257	39741	223.88	0.784433	0.990564	0.94162	0.878827	0.00647129	0.00238114	0.772337	0.998984	SEKER
39367	728.934	247.747	202.501	1.22344	0.576116	39776	223.883	0.767448	0.989717	0.931034	0.903676	0.00629327	0.00258885	0.816629	0.999096	SEKER
39371	717.522	251.053	199.868	1.25609	0.60514	39695	223.894	0.792301	0.991838	0.960983	0.89182	0.00637661	0.00248816	0.795343	0.999026	SEKER
39383	717.481	247.289	203.044	1.21791	0.570815	39745	223.929	0.774646	0.990892	0.961386	0.905534	0.00627908	0.00260432	0.819992	0.998677	SEKER
39385	748.882	258.746	194.256	1.33198	0.660575	39895	223.934	0.767111	0.987216	0.882498	0.86546	0.00656965	0.00227358	0.749021	0.997685	SEKER
39397	718.796	259.942	193.084	1.34627	0.669518	39682	223.968	0.790184	0.992818	0.958212	0.861608	0.00659802	0.00224302	0.742368	0.999425	SEKER
39404	715.247	251.818	199.493	1.26229	0.610247	39719	223.988	0.789058	0.992069	0.967917	0.889486	0.00639066	0.00246764	0.791185	0.998705	SEKER
39408	711.634	247.17	203.113	1.21691	0.569845	39687	224	0.795591	0.99297	0.977869	0.906257	0.00627208	0.00260974	0.821302	0.999452	SEKER
39417	714.124	245.986	204.314	1.20396	0.556883	39724	224.025	0.774675	0.992272	0.971284	0.910723	0.00624061	0.00264821	0.829417	0.998586	SEKER
39420	720.487	251.859	199.797	1.26058	0.608848	39812	224.034	0.740421	0.990154	0.954276	0.88952	0.00638912	0.00246742	0.791245	0.997426	SEKER
39430	755.532	236.77	213.26	1.11024	0.434426	40085	224.062	0.782807	0.98366	0.868022	0.94633	0.00600481	0.00297064	0.895541	0.994264	SEKER
39436	726.064	256.84	196.215	1.30897	0.645263	39794	224.079	0.779368	0.991004	0.940054	0.872448	0.00651282	0.00232759	0.761166	0.996342	SEKER
39436	717.903	242.91	207.027	1.17332	0.523083	39765	224.079	0.762402	0.991726	0.961548	0.92248	0.00615959	0.00275143	0.850969	0.99846	SEKER
39444	726.844	250.949	200.453	1.25191	0.601622	39776	224.102	0.746226	0.991653	0.938228	0.893017	0.00636216	0.00249588	0.797479	0.998371	SEKER
39445	725.307	258.51	194.667	1.32796	0.65798	39899	224.105	0.753184	0.988621	0.942233	0.866911	0.00655367	0.0022833	0.751534	0.998007	SEKER
39446	724.726	253.949	197.86	1.28348	0.626859	39830	224.108	0.772633	0.990359	0.943768	0.882491	0.00643789	0.00240859	0.77879	0.999559	SEKER
39450	747.706	255.749	196.557	1.30114	0.639785	40001	224.119	0.74852	0.986225	0.886738	0.876323	0.00648287	0.00235832	0.767941	0.999203	SEKER
39452	735.692	261.319	192.627	1.35661	0.67575	39950	224.125	0.736429	0.987534	0.915982	0.857666	0.00662373	0.00221083	0.735591	0.997911	SEKER
39454	717.993	255.606	196.912	1.29807	0.637591	39779	224.13	0.796568	0.99183	0.961746	0.876859	0.00647858	0.00236254	0.768882	0.998062	SEKER
39455	726.205	248.363	202.617	1.22578	0.578322	39861	224.133	0.781581	0.989815	0.940142	0.90244	0.00629485	0.00257537	0.814398	0.998271	SEKER
39462	720.25	233.524	215.466	1.08381	0.385582	39808	224.153	0.776078	0.991308	0.955922	0.959873	0.00591768	0.00309875	0.921356	0.998572	SEKER
39488	741.696	245.022	205.622	1.19162	0.543828	40042	224.227	0.746521	0.986165	0.902034	0.91513	0.00620497	0.00268442	0.837463	0.997934	SEKER
39493	720.349	246.911	204.102	1.20974	0.562755	39854	224.241	0.799972	0.990942	0.95641	0.908187	0.00625201	0.00262362	0.824804	0.997798	SEKER
39504	725.338	243.699	206.714	1.17892	0.529621	39885	224.272	0.767813	0.990448	0.943561	0.920285	0.00616897	0.00272948	0.846924	0.998455	SEKER
39506	725.692	243.182	206.997	1.17481	0.524842	39972	224.278	0.774172	0.988342	0.942689	0.922263	0.00615557	0.00274706	0.85057	0.99926	SEKER
39509	737.717	261.881	192.283	1.36196	0.678894	40027	224.286	0.773322	0.987059	0.912276	0.856443	0.0066284	0.0021998	0.733495	0.99899	SEKER
39514	721.708	258.223	195.143	1.32325	0.654903	39854	224.301	0.763334	0.991469	0.953318	0.86863	0.00653499	0.0022949	0.754519	0.998419	SEKER
39515	714.776	238.951	210.644	1.13439	0.47212	39852	224.304	0.796208	0.991544	0.971923	0.9387	0.0060471	0.00289624	0.881157	0.999572	SEKER
39524	721.543	248.868	202.459	1.22923	0.581539	39875	224.329	0.750693	0.991197	0.953995	0.901397	0.00629664	0.0025642	0.812516	0.998768	SEKER
39528	718.837	245.456	205.124	1.19662	0.549208	39899	224.34	0.770586	0.990702	0.961289	0.913974	0.00620968	0.00267291	0.835348	0.999596	SEKER
39535	723.825	254.502	198.291	1.28347	0.626856	39943	224.36	0.747947	0.989785	0.948253	0.881566	0.00643738	0.00239833	0.777159	0.997463	SEKER
39569	726.291	258.173	195.817	1.31844	0.651705	39908	224.457	0.734119	0.991505	0.942635	0.869403	0.00652464	0.00229943	0.755861	0.996557	SEKER
39573	719.251	245.38	205.81	1.19226	0.544529	39935	224.468	0.779733	0.990935	0.961276	0.914779	0.00620068	0.00267845	0.83682	0.997709	SEKER
39579	721.252	242.046	208.46	1.16112	0.508198	39904	224.485	0.769047	0.991855	0.956094	0.927447	0.00611552	0.00279107	0.860159	0.998744	SEKER
39581	717.629	237.014	212.804	1.11377	0.440292	39918	224.491	0.775323	0.991558	0.965821	0.947164	0.00598807	0.00297281	0.897119	0.999181	SEKER
39598	715.191	245.753	205.331	1.19686	0.549464	39879	224.539	0.783995	0.992954	0.972835	0.913676	0.00620621	0.00266793	0.834803	0.999146	SEKER
39614	720.724	249.872	202.013	1.23691	0.588544	39972	224.584	0.755416	0.991044	0.958342	0.898799	0.00630766	0.0025392	0.807839	0.999225	SEKER
39621	733.765	256.39	197.005	1.30144	0.639994	40021	224.604	0.783891	0.990005	0.924744	0.876025	0.00647106	0.00235083	0.76742	0.998751	SEKER
39622	723.79	250.352	201.727	1.24105	0.592227	39956	224.607	0.797544	0.991641	0.950432	0.897165	0.00631851	0.00252513	0.804904	0.998924	SEKER
39628	723.609	250.115	201.87	1.23899	0.5904	39976	224.624	0.752554	0.991295	0.951052	0.898083	0.00631157	0.0025327	0.806554	0.99931	SEKER
39629	719.764	245.414	205.861	1.19214	0.544392	40002	224.627	0.749641	0.990675	0.961264	0.915298	0.00619279	0.00268112	0.83777	0.998735	SEKER
39635	717.433	251.577	200.855	1.25253	0.60215	39904	224.644	0.764122	0.993259	0.967667	0.892941	0.00634735	0.00248922	0.797344	0.998699	SEKER
39645	715.39	251.015	201.262	1.2472	0.597601	39941	224.672	0.772265	0.992589	0.973448	0.895056	0.00633156	0.00250663	0.801125	0.999166	SEKER
39668	716.495	251.662	200.925	1.25252	0.602136	39938	224.737	0.801536	0.99324	0.97101	0.893013	0.0063442	0.00248879	0.797473	0.998846	SEKER
39669	715.564	248.076	203.901	1.21665	0.56959	39958	224.74	0.777412	0.992767	0.973563	0.905932	0.00625365	0.00259834	0.820713	0.998521	SEKER
39670	722.087	249.94	202.264	1.23571	0.587465	40041	224.743	0.796346	0.990734	0.956077	0.899189	0.00630047	0.00254072	0.80854	0.999124	SEKER
39676	721.502	240.624	210.234	1.14456	0.486463	40044	224.76	0.773562	0.99081	0.957773	0.93407	0.00606473	0.0028478	0.872487	0.99861	SEKER
39686	715.976	239.599	211.26	1.13414	0.471765	40005	224.788	0.780452	0.992026	0.97286	0.938185	0.00603737	0.00288524	0.880191	0.998261	SEKER
39698	742.795	251.141	201.893	1.24393	0.594758	40263	224.822	0.745083	0.985967	0.90415	0.895205	0.00632628	0.00250621	0.801391	0.996874	SEKER
39701	718.722	253.705	199.306	1.27294	0.618759	40020	224.831	0.777628	0.992029	0.965805	0.886188	0.0063904	0.00243115	0.78533	0.999681	SEKER
39703	720.914	248.612	203.453	1.22196	0.574712	40053	224.836	0.763769	0.991262	0.959989	0.904367	0.0062618	0.00258379	0.817879	0.999417	SEKER
39706	720.946	254.17	199.073	1.27676	0.621732	40009	224.845	0.783125	0.992427	0.959976	0.884626	0.00640129	0.00241816	0.782563	0.999148	SEKER
39709	719.045	253.666	199.559	1.27113	0.617335	40046	224.853	0.772338	0.991585	0.965132	0.886415	0.00638813	0.00243277	0.785731	0.998768	SEKER
39721	739.568	257.063	197.129	1.30404	0.641827	40255	224.887	0.78455	0.986735	0.912586	0.874833	0.00647172	0.0023383	0.765333	0.998022	SEKER
39728	727.917	249.828	202.922	1.23115	0.583313	40129	224.907	0.767557	0.990007	0.942199	0.90025	0.00628845	0.00254786	0.81045	0.997787	SEKER
39733	727.157	256.333	197.836	1.29569	0.635875	40033	224.921	0.761052	0.992506	0.944289	0.877458	0.00645139	0.00235905	0.769932	0.99759	SEKER
39746	727.669	233.939	216.498	1.08056	0.378878	40185	224.958	0.782741	0.989076	0.943269	0.961612	0.00588584	0.00310447	0.924698	0.999191	SEKER
39754	721.292	252.458	201.192	1.25481	0.604068	40091	224.981	0.791912	0.991594	0.960215	0.891162	0.0063505	0.00247067	0.79417	0.996534	SEKER
39755	737.943	266.086	190.755	1.39491	0.697182	40208	224.984	0.733027	0.988734	0.917394	0.845531	0.00669313	0.00211022	0.714923	0.99725	SEKER
39757	719.823	247.995	204.468	1.21288	0.565884	40101	224.989	0.775746	0.991422	0.964211	0.907234	0.00623777	0.00260667	0.823073	0.998287	SEKER
39764	722.344	252.758	200.558	1.26027	0.608599	40089	225.009	0.767423	0.991893	0.957661	0.890216	0.00635645	0.0024625	0.792485	0.998749	SEKER
39765	736.601	253.968	199.938	1.27023	0.616624	40214	225.012	0.74976	0.988835	0.920972	0.885985	0.00638672	0.00242752	0.784969	0.997093	SEKER
39767	724.386	251.407	201.625	1.2469	0.597341	40117	225.018	0.784854	0.991276	0.952341	0.895034	0.006322	0.0025026	0.801085	0.998876	SEKER
39774	719.525	241.507	209.986	1.15011	0.493964	40111	225.037	0.756447	0.991598	0.965422	0.931804	0.00607199	0.00282364	0.868258	0.998592	SEKER
39779	719.021	252.48	200.891	1.2568	0.605725	40075	225.052	0.775298	0.992614	0.966898	0.891365	0.00634706	0.00247158	0.794532	0.998564	SEKER
39790	734.078	248.162	204.389	1.21416	0.567152	40254	225.083	0.781238	0.988473	0.927896	0.907	0.00623678	0.00260357	0.822649	0.998829	SEKER
39803	727.139	252.317	201.682	1.25106	0.600905	40242	225.119	0.791155	0.989091	0.945999	0.892208	0.00633915	0.00247785	0.796034	0.995889	SEKER
39807	719.325	241.46	210.051	1.14953	0.49319	40140	225.131	0.787073	0.991704	0.966761	0.932372	0.00606577	0.00282763	0.869318	0.999306	SEKER
39826	732.976	247.039	205.713	1.20089	0.553704	40266	225.184	0.791754	0.989073	0.93153	0.911532	0.00620297	0.0026416	0.830891	0.997812	SEKER
39833	720.171	247.166	205.348	1.20365	0.556557	40184	225.204	0.76285	0.991265	0.965121	0.911146	0.00620505	0.00263802	0.830187	0.999251	SEKER
39834	723.396	258.496	196.303	1.31682	0.65062	40145	225.207	0.774981	0.992253	0.956559	0.87122	0.00648934	0.00230617	0.759024	0.9995	SEKER
39835	731.546	249.61	203.446	1.22691	0.57938	40279	225.21	0.793779	0.988977	0.935387	0.902249	0.00626609	0.00256142	0.814052	0.998767	SEKER
39859	724.609	255.685	198.753	1.28644	0.629086	40202	225.278	0.785476	0.991468	0.953957	0.881077	0.00641473	0.00238458	0.776296	0.998662	SEKER
39868	732.632	255.116	199.12	1.28122	0.625147	40297	225.303	0.753876	0.989354	0.933389	0.883139	0.00639903	0.00240109	0.779934	0.999266	SEKER
39872	721.45	249.106	204.065	1.22072	0.573524	40228	225.314	0.779831	0.99115	0.962643	0.904492	0.00624764	0.00257938	0.818106	0.998678	SEKER
39883	729.422	245.941	206.759	1.18951	0.541528	40302	225.346	0.757512	0.989603	0.941976	0.916258	0.00616657	0.00268098	0.839528	0.998626	SEKER
39890	721.856	247.164	205.874	1.20056	0.553358	40261	225.365	0.757645	0.990785	0.961995	0.911805	0.00619614	0.00264185	0.831388	0.998132	SEKER
39898	714.231	239.76	212.05	1.13068	0.46668	40185	225.388	0.780477	0.992858	0.982842	0.940057	0.00600932	0.00289482	0.883708	0.999187	SEKER
39898	743.961	257.436	197.919	1.30071	0.639479	40460	225.388	0.761528	0.98611	0.905859	0.87551	0.00645236	0.00233853	0.766518	0.997021	SEKER
39901	730.829	258.15	197.149	1.30941	0.645571	40316	225.396	0.769324	0.989706	0.938776	0.873123	0.00646976	0.00231936	0.762343	0.998223	SEKER
39901	716.133	239.502	212.5	1.12707	0.461273	40196	225.396	0.796236	0.992661	0.977701	0.941105	0.0060024	0.0029044	0.885678	0.998219	SEKER
39926	723.237	248.275	205.005	1.21107	0.564084	40308	225.467	0.781025	0.990523	0.959189	0.908134	0.00621838	0.00260889	0.824707	0.998776	SEKER
39928	737.776	252.97	201.198	1.25732	0.606158	40395	225.473	0.748262	0.988439	0.921804	0.891302	0.00633565	0.00246644	0.79442	0.998837	SEKER
39930	721.559	251.544	202.244	1.24376	0.594613	40234	225.478	0.76932	0.992444	0.963752	0.896378	0.00629961	0.00250876	0.803494	0.999356	SEKER
39935	737.056	253.327	200.977	1.26048	0.608764	40360	225.492	0.782211	0.98947	0.923767	0.890123	0.00634349	0.00245645	0.792319	0.998699	SEKER
39940	730.921	252.616	201.601	1.25305	0.602585	40331	225.507	0.755981	0.990305	0.939457	0.892686	0.00632488	0.00247758	0.796889	0.998538	SEKER
39948	731.068	244.969	207.964	1.17794	0.528489	40386	225.529	0.772032	0.989155	0.939268	0.920643	0.0061322	0.00271745	0.847583	0.998402	SEKER
39951	725.181	247.919	205.563	1.20605	0.559019	40307	225.538	0.761886	0.991168	0.954651	0.909722	0.00620559	0.00262178	0.827593	0.998117	SEKER
39951	739.057	250.384	203.48	1.23051	0.582721	40414	225.538	0.75536	0.988544	0.91914	0.900768	0.00626727	0.00254513	0.811384	0.998414	SEKER
39951	718.307	247.297	205.972	1.20063	0.55343	40267	225.538	0.808643	0.992152	0.97301	0.912013	0.00619	0.00264164	0.831767	0.998645	SEKER
39965	739.181	248.245	205.42	1.20848	0.561486	40461	225.577	0.783627	0.987741	0.919154	0.908686	0.00621157	0.00261238	0.825709	0.997853	SEKER
39984	729.801	254.432	200.581	1.26847	0.615228	40353	225.631	0.820892	0.990856	0.943381	0.886802	0.00636334	0.00242757	0.786418	0.99755	SEKER
39989	718.723	247.161	206.144	1.19897	0.551691	40283	225.645	0.756064	0.992702	0.972808	0.912946	0.00618073	0.0026485	0.83347	0.999306	SEKER
39998	720.425	251.302	202.855	1.23883	0.590258	40296	225.67	0.788682	0.992605	0.968435	0.898004	0.00628286	0.00252029	0.806411	0.999005	SEKER
40000	738.009	264.589	192.766	1.37259	0.684994	40470	225.676	0.727564	0.988386	0.922883	0.85293	0.00661473	0.00215946	0.727489	0.998545	SEKER
40000	727.877	246.699	206.888	1.19243	0.544707	40425	225.676	0.755858	0.989487	0.948755	0.914782	0.00616748	0.00266414	0.836825	0.997852	SEKER
40009	742.191	265.109	192.63	1.37626	0.687056	40475	225.701	0.777629	0.988487	0.912717	0.851351	0.00662624	0.00214725	0.724799	0.997515	SEKER
40021	719.269	252.31	202.195	1.24785	0.598161	40316	225.735	0.782332	0.992683	0.972109	0.894674	0.00630444	0.00249164	0.800441	0.998833	SEKER
40024	724.462	240.43	212.085	1.13365	0.471046	40386	225.744	0.766655	0.991036	0.958295	0.938916	0.00600714	0.00287975	0.881564	0.999382	SEKER
40025	725.214	248.43	206.036	1.20576	0.558726	40354	225.746	0.771016	0.991847	0.956332	0.908691	0.00620688	0.00261046	0.825719	0.99562	SEKER
40044	723.751	262.689	194.29	1.35205	0.673025	40340	225.8	0.781804	0.992662	0.960658	0.85957	0.00656002	0.00220907	0.73886	0.998973	SEKER
40055	723.478	244.899	208.468	1.17476	0.524775	40387	225.831	0.791272	0.99178	0.961648	0.92214	0.00611406	0.00272707	0.850342	0.998944	SEKER
40064	726.711	253.531	201.602	1.25758	0.606379	40403	225.856	0.766452	0.99161	0.953324	0.890842	0.00632816	0.00245844	0.793599	0.998017	SEKER
40064	721.433	241.513	211.387	1.14252	0.483651	40450	225.856	0.794464	0.990457	0.967324	0.935173	0.00602817	0.00284403	0.874549	0.999187	SEKER
40067	724.428	245.509	208.058	1.18	0.530868	40443	225.865	0.764564	0.990703	0.959414	0.919984	0.00612747	0.00270759	0.84637	0.998721	SEKER
40091	727.083	261.313	195.56	1.33623	0.663277	40500	225.932	0.786823	0.989901	0.952991	0.864604	0.006518	0.00224679	0.747539	0.998884	SEKER
40098	718.837	248.478	205.791	1.20743	0.560422	40356	225.952	0.796085	0.993607	0.975151	0.909346	0.00619676	0.00261373	0.826911	0.998435	SEKER
40111	740.571	250.514	204.013	1.22793	0.580337	40644	225.989	0.760312	0.986886	0.919052	0.902101	0.00624551	0.00255134	0.813786	0.999275	SEKER
40113	726.074	251.568	203.298	1.23743	0.589013	40420	225.994	0.783579	0.992405	0.956166	0.898342	0.00627149	0.00251952	0.807019	0.998633	SEKER
40115	735.396	252.944	202.917	1.24654	0.597026	40613	226	0.763659	0.987738	0.932125	0.893478	0.00630547	0.00247876	0.798304	0.995116	SEKER
40116	724.693	254.822	200.699	1.26968	0.616184	40460	226.003	0.7788	0.991498	0.959885	0.886903	0.00635214	0.0024244	0.786597	0.998724	SEKER
40119	734.219	264.795	193.122	1.37112	0.684163	40472	226.011	0.753408	0.991278	0.935209	0.853534	0.00660023	0.00216084	0.72852	0.998891	SEKER
40123	724.676	257.402	198.704	1.2954	0.63567	40429	226.023	0.794987	0.992431	0.960098	0.878091	0.00641533	0.00235265	0.771044	0.998812	SEKER
40126	730.299	265.738	192.427	1.38098	0.689673	40483	226.031	0.784584	0.991181	0.945441	0.850577	0.0066226	0.00213827	0.723481	0.999116	SEKER
40126	721.437	250.251	204.369	1.2245	0.577123	40413	226.031	0.760957	0.992898	0.968811	0.903216	0.00623663	0.00256034	0.8158	0.99895	SEKER
40142	735.881	265.016	193.261	1.37129	0.684257	40542	226.076	0.781855	0.990134	0.931523	0.853065	0.00660197	0.00215666	0.72772	0.997914	SEKER
40143	721.446	251.927	203.189	1.23986	0.591179	40480	226.079	0.74782	0.991675	0.969197	0.897399	0.00627573	0.00251066	0.805325	0.998494	SEKER
40146	732.715	254.083	201.537	1.26073	0.608969	40549	226.087	0.767258	0.990061	0.939684	0.889817	0.00632897	0.00244746	0.791774	0.99821	SEKER
40150	722.163	251.267	203.665	1.23373	0.585666	40443	226.099	0.765856	0.992755	0.967442	0.899833	0.00625821	0.00253092	0.8097	0.998948	SEKER
40154	729.638	241.285	211.975	1.13827	0.477695	40559	226.11	0.766634	0.990015	0.947815	0.937108	0.00600898	0.00285851	0.878172	0.999598	SEKER
40161	724.95	246.455	207.767	1.18621	0.537879	40535	226.13	0.77732	0.990773	0.960281	0.91753	0.00613667	0.00268283	0.841862	0.998623	SEKER
40166	731.962	252.627	202.94	1.24484	0.595549	40541	226.144	0.753866	0.99075	0.942088	0.895168	0.00628957	0.00249126	0.801326	0.997519	SEKER
40168	737.07	256.078	199.979	1.28052	0.624617	40630	226.149	0.796178	0.988629	0.929122	0.883127	0.00637517	0.00239202	0.779914	0.998697	SEKER
40172	721.945	244.904	209.377	1.16968	0.518735	40501	226.161	0.819736	0.991877	0.968557	0.923467	0.00609638	0.00273487	0.852791	0.997492	SEKER
40196	729.067	251.195	204.321	1.22942	0.581714	40594	226.228	0.77297	0.990196	0.950294	0.900606	0.00624926	0.00253599	0.811091	0.99717	SEKER
40197	742.209	256.795	199.542	1.28692	0.629441	40643	226.231	0.762303	0.989026	0.916961	0.880979	0.00638841	0.00237375	0.776124	0.998811	SEKER
40202	726.182	251.795	203.492	1.23737	0.588955	40556	226.245	0.756758	0.991271	0.958002	0.898529	0.00626324	0.0025183	0.807355	0.998996	SEKER
40242	734.477	247.411	207.439	1.19269	0.544995	40680	226.357	0.772696	0.989233	0.937417	0.914904	0.00614809	0.00265718	0.837049	0.998341	SEKER
40243	727.238	252.263	203.26	1.24109	0.592262	40600	226.36	0.795442	0.991207	0.956196	0.897318	0.0062685	0.00250686	0.80518	0.999299	SEKER
40248	726.411	258.654	198.817	1.30096	0.639655	40574	226.374	0.808453	0.991965	0.958494	0.875202	0.0064265	0.00232588	0.765978	0.996509	SEKER
40248	725.14	256.438	200.014	1.2821	0.625816	40570	226.374	0.757895	0.992063	0.961857	0.882763	0.00637146	0.00238669	0.779271	0.999103	SEKER
40265	729.52	257.451	199.65	1.28951	0.631365	40629	226.422	0.798433	0.991041	0.950743	0.879476	0.00639392	0.00235963	0.773479	0.997412	SEKER
40272	723.726	249.723	205.523	1.21506	0.568035	40551	226.442	0.768476	0.99312	0.966195	0.906772	0.00620091	0.002586	0.822236	0.999066	SEKER
40273	722.923	252.374	203.387	1.24085	0.592054	40573	226.445	0.778583	0.992606	0.968367	0.897259	0.00626657	0.00250543	0.805074	0.998978	SEKER
40285	737.587	261.999	195.954	1.33705	0.663792	40752	226.478	0.745563	0.98854	0.930522	0.864425	0.00650364	0.00223998	0.74723	0.999081	SEKER
40286	764.364	256.264	200.789	1.27629	0.621362	41170	226.481	0.758882	0.978528	0.86649	0.88378	0.00636112	0.00239381	0.781067	0.996865	SEKER
40289	734.253	247.601	207.372	1.194	0.546403	40728	226.49	0.77253	0.989221	0.939085	0.914735	0.00614563	0.00265416	0.83674	0.999066	SEKER
40310	729.425	255.405	201.239	1.26916	0.615776	40674	226.549	0.75166	0.991051	0.952054	0.887019	0.00633601	0.00241951	0.786802	0.99858	SEKER
40326	730.663	254.913	201.715	1.26373	0.611414	40661	226.594	0.792992	0.991761	0.949207	0.888907	0.0063213	0.00243451	0.790156	0.99854	SEKER
40329	724.982	251.303	205.059	1.22552	0.578078	40651	226.602	0.790827	0.992079	0.964213	0.901709	0.00623132	0.00254112	0.813079	0.996442	SEKER
40334	737.758	249.854	206.006	1.21285	0.565853	40836	226.616	0.81031	0.987707	0.931222	0.906995	0.00619462	0.00258591	0.82264	0.997736	SEKER
40338	730.78	262.07	196.267	1.33527	0.66267	40674	226.627	0.779343	0.991739	0.949185	0.86476	0.00649684	0.00224111	0.747809	0.998528	SEKER
40339	732.176	254.679	202.397	1.25831	0.606984	40755	226.63	0.803566	0.989793	0.945592	0.889867	0.00631346	0.00244201	0.791864	0.996413	SEKER
40348	744.73	255.925	201.358	1.271	0.617227	40885	226.655	0.762117	0.986866	0.914185	0.88563	0.00634295	0.00240703	0.784341	0.996894	SEKER
40363	736.091	268.697	191.711	1.40158	0.700675	40681	226.698	0.740388	0.992183	0.936117	0.843691	0.00665702	0.00208062	0.711814	0.997663	SEKER
40367	732.896	262.794	195.964	1.34103	0.666289	40675	226.709	0.768895	0.992428	0.944391	0.862687	0.00651011	0.00222424	0.744229	0.998035	SEKER
40381	724.736	254.376	202.377	1.25694	0.605843	40687	226.748	0.747298	0.992479	0.966112	0.891391	0.00629939	0.0024533	0.794578	0.998735	SEKER
40388	729.945	261.228	197.14	1.32509	0.656107	40719	226.768	0.784538	0.991871	0.952537	0.868084	0.00646796	0.00226565	0.753569	0.998544	SEKER
40392	736.057	267.276	192.656	1.38732	0.693129	40754	226.779	0.768844	0.991117	0.936876	0.848481	0.00661706	0.0021155	0.71992	0.998761	SEKER
40393	730.714	250.965	205.328	1.22226	0.574999	40765	226.782	0.766834	0.990875	0.950651	0.903639	0.00621308	0.00255545	0.816564	0.998056	SEKER
40398	724.683	252.234	204.023	1.2363	0.587996	40714	226.796	0.792118	0.992239	0.96666	0.899148	0.00624373	0.00251738	0.808467	0.999509	SEKER
40409	734.88	246.301	209.09	1.17796	0.528518	40864	226.827	0.772786	0.988866	0.940275	0.920932	0.00609521	0.00270445	0.848116	0.999051	SEKER
40415	730.648	258.672	199.161	1.29881	0.638119	40770	226.844	0.770837	0.991293	0.951341	0.876955	0.00640039	0.00233505	0.769051	0.998848	SEKER
40422	739.701	249.043	206.843	1.20402	0.556941	40891	226.863	0.768771	0.98853	0.928357	0.91094	0.00616107	0.00261695	0.829812	0.999109	SEKER
40422	726.959	259.131	198.979	1.3023	0.640604	40712	226.863	0.782508	0.992877	0.961187	0.875478	0.00641063	0.00232307	0.766462	0.998165	SEKER
40429	723.823	243.945	211.233	1.15486	0.500213	40816	226.883	0.790865	0.990518	0.969702	0.930056	0.00603392	0.00278494	0.865005	0.998964	SEKER
40445	730.904	258.313	199.954	1.29186	0.633093	40795	226.928	0.767982	0.991421	0.95138	0.878498	0.00638678	0.00234652	0.771758	0.997007	SEKER
40446	742.366	264.137	195.421	1.35163	0.672773	41006	226.93	0.732877	0.986343	0.922251	0.85914	0.00653061	0.00219477	0.738121	0.997664	SEKER
40453	728.447	258.311	199.556	1.29443	0.634964	40801	226.95	0.780705	0.991471	0.957998	0.878592	0.00638546	0.00234704	0.771924	0.9992	SEKER
40459	733.681	247.978	208.01	1.19214	0.544402	40874	226.967	0.782648	0.989847	0.944518	0.91527	0.00612912	0.00265323	0.837719	0.998683	SEKER
40459	726.133	250.052	206.264	1.21229	0.565298	40829	226.967	0.758568	0.990938	0.964257	0.90768	0.00618037	0.00258777	0.823883	0.998784	SEKER
40462	733.598	248.222	207.75	1.19481	0.547275	40843	226.975	0.792006	0.990672	0.944802	0.914406	0.00613469	0.00264563	0.836138	0.999027	SEKER
40462	741.338	249.643	206.622	1.20821	0.561216	40933	226.975	0.792906	0.988493	0.925177	0.9092	0.00616981	0.0026007	0.826645	0.998763	SEKER
40464	763.363	239.66	216.07	1.10918	0.432636	41122	226.981	0.748557	0.983999	0.872603	0.947096	0.0059228	0.00293956	0.89699	0.994922	SEKER
40480	732.301	261.322	197.563	1.32273	0.654558	40810	227.026	0.784739	0.991914	0.948574	0.868758	0.00645559	0.00226835	0.75474	0.998318	SEKER
40484	733.501	254.447	202.748	1.25499	0.604216	40856	227.037	0.758681	0.990895	0.945566	0.892277	0.00628512	0.00245749	0.796159	0.999169	SEKER
40485	733.929	255.682	202.158	1.26476	0.612253	40835	227.04	0.792177	0.991429	0.944487	0.887976	0.00631548	0.0024221	0.788502	0.997268	SEKER
40486	727.273	244.537	211.064	1.15859	0.505005	40839	227.043	0.789616	0.991356	0.961878	0.928458	0.00604004	0.00276866	0.862035	0.998747	SEKER
40504	740.479	245.542	210.426	1.16688	0.515337	40946	227.093	0.76319	0.989205	0.928287	0.924866	0.00606216	0.00273604	0.855377	0.99812	SEKER
40504	727.151	258.434	199.885	1.29292	0.633862	40814	227.093	0.756208	0.992405	0.962628	0.878727	0.00638046	0.00234665	0.772162	0.99834	SEKER
40512	737.636	248.202	208.525	1.19027	0.542365	40973	227.116	0.744268	0.988749	0.935641	0.915043	0.00612663	0.00264952	0.837304	0.996621	SEKER
40516	733.046	255.955	201.897	1.26775	0.614654	40896	227.127	0.772336	0.990708	0.947489	0.887369	0.00631739	0.00241621	0.787424	0.99826	SEKER
40527	730.217	254.295	203.134	1.25185	0.601577	40849	227.158	0.772531	0.992117	0.955104	0.893285	0.0062747	0.00246452	0.797957	0.998927	SEKER
40527	754.329	234.836	220.447	1.06527	0.344662	41159	227.158	0.769451	0.984645	0.89502	0.967303	0.00579456	0.00312932	0.935675	0.996749	SEKER
40533	755.94	252.953	204.317	1.23804	0.589554	41130	227.174	0.767205	0.985485	0.891341	0.898091	0.00624066	0.00250433	0.806567	0.998561	SEKER
40547	725.149	259.024	199.592	1.29777	0.637375	40819	227.214	0.76199	0.993336	0.968978	0.87719	0.00638825	0.00233312	0.769463	0.998585	SEKER
40566	737.031	268.888	192.418	1.39742	0.698504	40945	227.267	0.788363	0.990744	0.938427	0.845211	0.0066284	0.00208665	0.714382	0.998288	SEKER
40570	737.047	248.719	208.315	1.19396	0.546359	40979	227.278	0.750685	0.990019	0.938479	0.913793	0.00613062	0.00263679	0.835018	0.996976	SEKER
40572	743.746	241.138	214.706	1.12311	0.455207	41068	227.284	0.758923	0.987922	0.921694	0.942547	0.00594345	0.00289355	0.888394	0.997763	SEKER
40572	725.331	250.714	206.472	1.21428	0.567264	40900	227.284	0.767479	0.99198	0.969089	0.906546	0.00617948	0.00257449	0.821825	0.997923	SEKER
40580	925.731	259.092	200.519	1.29211	0.633272	41753	227.306	0.751259	0.971906	0.595048	0.87732	0.00638471	0.0023332	0.76969	0.994522	SEKER
40587	746.02	262.97	196.742	1.33662	0.663525	41053	227.326	0.777529	0.988649	0.916423	0.864456	0.00647916	0.00223188	0.747285	0.998837	SEKER
40591	727.926	252.668	204.964	1.23274	0.584769	40944	227.337	0.795434	0.991378	0.962643	0.899744	0.00622474	0.00251639	0.80954	0.997954	SEKER
40596	735.327	255.361	202.756	1.25945	0.607921	41023	227.351	0.780392	0.989591	0.943479	0.890312	0.0062903	0.00243793	0.792656	0.998311	SEKER
40596	730.855	255.793	202.36	1.26405	0.611679	40920	227.351	0.768398	0.992082	0.95506	0.888807	0.00630095	0.00242558	0.789979	0.998575	SEKER
40609	725.346	250.937	206.381	1.21589	0.568848	40899	227.387	0.778487	0.992909	0.969933	0.906154	0.00617934	0.00256998	0.821115	0.998385	SEKER
40622	727.43	250.451	206.728	1.2115	0.564514	40942	227.424	0.765009	0.992184	0.964692	0.908055	0.00616541	0.00258578	0.824564	0.998959	SEKER
40636	783.891	250.076	207.918	1.20276	0.555646	41391	227.463	0.756525	0.981759	0.831016	0.909576	0.00615405	0.00259834	0.827328	0.995079	SEKER
40641	727.677	253.516	204.566	1.23929	0.590666	40960	227.477	0.790558	0.992212	0.964488	0.897289	0.00623793	0.00249431	0.805128	0.997784	SEKER
40644	726.397	249.894	207.622	1.2036	0.556514	40996	227.485	0.770502	0.991414	0.967962	0.910326	0.00614837	0.00260452	0.828693	0.997418	SEKER
40646	741.995	253.385	204.83	1.23705	0.588669	41085	227.491	0.736861	0.989315	0.927739	0.897807	0.00623395	0.00249847	0.806057	0.997133	SEKER
40647	737.815	247.633	209.159	1.18395	0.535348	41105	227.494	0.779395	0.988858	0.938304	0.918672	0.00609229	0.00267671	0.843958	0.999203	SEKER
40648	728.896	260.197	199.143	1.30658	0.643609	40970	227.496	0.754501	0.992141	0.961431	0.874323	0.00640124	0.00230744	0.76444	0.998805	SEKER
40649	727.588	253.481	204.305	1.2407	0.59192	40977	227.499	0.758575	0.991996	0.964914	0.897502	0.00623584	0.00249583	0.805509	0.999395	SEKER
40660	734.722	241.62	214.896	1.12436	0.457138	41027	227.53	0.784715	0.991055	0.946523	0.941684	0.00594246	0.00288248	0.886768	0.997045	SEKER
40662	727.207	248.595	208.502	1.19229	0.544558	41024	227.536	0.79356	0.991176	0.966234	0.915286	0.0061137	0.00264674	0.837748	0.998838	SEKER
40676	734.559	258.726	200.442	1.29078	0.632295	41045	227.575	0.753483	0.99101	0.947316	0.879597	0.00636066	0.00234864	0.773691	0.998662	SEKER
40688	732.945	258.748	200.433	1.29095	0.632422	41046	227.608	0.79854	0.991278	0.951773	0.879651	0.00635933	0.00234873	0.773786	0.998918	SEKER
40692	735.097	262.054	198.253	1.32182	0.653954	41069	227.62	0.764313	0.99082	0.946302	0.868596	0.00643995	0.00226118	0.75446	0.997258	SEKER
40695	730.309	256.912	201.886	1.27256	0.618458	41014	227.628	0.759518	0.992222	0.958821	0.886015	0.00631311	0.00239987	0.785022	0.998988	SEKER
40705	738.355	249.136	208.625	1.19418	0.546599	41147	227.656	0.764413	0.989258	0.938269	0.913781	0.00612053	0.00263231	0.834995	0.997135	SEKER
40710	728.852	252.688	205.44	1.22998	0.582234	41069	227.67	0.791577	0.991259	0.963013	0.900993	0.00620702	0.00252319	0.811789	0.998485	SEKER
40718	737.056	249.664	207.981	1.20042	0.553211	41105	227.692	0.762367	0.990585	0.941879	0.911994	0.00613154	0.00261648	0.831734	0.99843	SEKER
40719	744.134	255.644	203.012	1.25926	0.607762	41173	227.695	0.756648	0.988973	0.92407	0.890672	0.00627825	0.0024372	0.793297	0.998965	SEKER
40731	739.522	256.78	202.177	1.27008	0.6165	41145	227.729	0.759397	0.989938	0.935907	0.886863	0.00630429	0.0024057	0.786526	0.998947	SEKER
40736	732.691	249.294	208.56	1.19531	0.547811	41104	227.743	0.760142	0.991047	0.953557	0.91355	0.00611975	0.00262932	0.834574	0.997576	SEKER
40737	724.96	252.214	205.872	1.2251	0.577687	41013	227.745	0.748402	0.99327	0.974027	0.902985	0.00619127	0.00253911	0.815382	0.998927	SEKER
40750	727.315	258.195	201.077	1.28406	0.627298	41009	227.782	0.781895	0.993684	0.968038	0.882208	0.00633608	0.00236747	0.778291	0.999373	SEKER
40752	728.679	241.615	215.183	1.12283	0.454782	41112	227.787	0.781858	0.991243	0.964465	0.942771	0.0059289	0.00288921	0.888817	0.997995	SEKER
40756	732.781	248.047	209.897	1.18176	0.532868	41203	227.798	0.775729	0.989151	0.953791	0.918369	0.00608614	0.00267049	0.843401	0.996694	SEKER
40778	725.165	254.143	204.398	1.24338	0.594274	41037	227.86	0.80278	0.993689	0.974456	0.89658	0.00623236	0.00248422	0.803857	0.999495	SEKER
40778	727.951	241.441	215.27	1.12157	0.452813	41119	227.86	0.771376	0.991707	0.967011	0.943752	0.00592085	0.00289731	0.890667	0.998947	SEKER
40790	753.802	259.948	200.036	1.29951	0.63862	41366	227.893	0.79358	0.986076	0.902088	0.876688	0.00637284	0.00232217	0.768583	0.998779	SEKER
40795	757.35	268.804	193.366	1.39013	0.69464	41287	227.907	0.740327	0.988083	0.893765	0.847856	0.00658915	0.00210038	0.71886	0.999309	SEKER
40803	730.673	260.321	199.752	1.30323	0.641256	41088	227.93	0.776077	0.993064	0.960408	0.875571	0.00637995	0.00231294	0.766625	0.999085	SEKER
40821	729.317	249.171	208.827	1.19319	0.545536	41172	227.98	0.75843	0.991475	0.964408	0.914954	0.00610399	0.0026387	0.83714	0.99887	SEKER
40822	732.103	260.562	199.665	1.305	0.642502	41171	227.983	0.784149	0.991523	0.957105	0.874965	0.00638289	0.0023076	0.765564	0.999061	SEKER
40824	736.42	257.159	202.31	1.27111	0.61732	41179	227.988	0.749339	0.991379	0.945963	0.886568	0.0062992	0.00240056	0.786002	0.999097	SEKER
40834	737.916	264.215	196.988	1.34128	0.666442	41174	228.016	0.749358	0.991742	0.942362	0.862994	0.00647048	0.00221385	0.744759	0.998929	SEKER
40838	731.101	242.897	214.415	1.13284	0.46986	41208	228.028	0.790423	0.991021	0.960107	0.938782	0.00594782	0.00284969	0.881312	0.998382	SEKER
40841	727.572	248.916	209.259	1.18951	0.541529	41171	228.036	0.788619	0.991985	0.969514	0.916116	0.00609476	0.00264812	0.839268	0.998318	SEKER
40841	737.702	252.145	206.544	1.22078	0.573578	41253	228.036	0.765372	0.990013	0.943071	0.904386	0.00617381	0.0025477	0.817913	0.998489	SEKER
40842	745.5	245.315	212.285	1.15559	0.501157	41338	228.039	0.776302	0.988001	0.923467	0.929575	0.00600644	0.00276652	0.864109	0.998558	SEKER
40845	749.469	262.262	198.684	1.31999	0.652743	41310	228.047	0.771417	0.988744	0.91378	0.86954	0.0064209	0.0022643	0.756101	0.998048	SEKER
40846	737.982	257.356	202.326	1.27199	0.61801	41230	228.05	0.777442	0.990686	0.942471	0.886125	0.00630065	0.00239632	0.785218	0.998788	SEKER
40857	779.192	244.126	214.113	1.14017	0.48038	41497	228.081	0.790515	0.984577	0.845644	0.934274	0.00597513	0.00280818	0.872868	0.99522	SEKER
40861	738.479	258.285	202.052	1.27831	0.622921	41373	228.092	0.784009	0.987625	0.941548	0.883101	0.00632107	0.00237143	0.779867	0.996909	SEKER
40863	737.27	263.798	197.703	1.33431	0.662061	41222	228.097	0.809088	0.991291	0.944685	0.864667	0.00645566	0.00222596	0.747649	0.997598	SEKER
40873	730.159	241.997	215.184	1.1246	0.457514	41202	228.125	0.76633	0.992015	0.963411	0.942677	0.00592071	0.00288407	0.88864	0.999368	SEKER
40884	733.137	249.623	208.702	1.19607	0.548623	41251	228.156	0.755809	0.991103	0.955857	0.914004	0.00610563	0.00262846	0.835402	0.999202	SEKER
40892	723.304	244.528	213.03	1.14786	0.490948	41189	228.178	0.799922	0.992789	0.982215	0.933139	0.00597984	0.00279676	0.870748	0.999495	SEKER
40895	731.734	258.52	201.886	1.28052	0.624617	41222	228.187	0.744412	0.992067	0.959784	0.882667	0.00632155	0.00236695	0.7791	0.997655	SEKER
40900	732.606	253.428	205.691	1.23208	0.584163	41235	228.201	0.791715	0.991876	0.957618	0.900456	0.00619628	0.00251281	0.81082	0.998994	SEKER
40901	735.219	257.647	202.511	1.27226	0.61822	41292	228.203	0.789351	0.990531	0.950846	0.885723	0.00629927	0.00239145	0.784505	0.998091	SEKER
40906	732.558	257.946	202.153	1.276	0.621139	41246	228.217	0.774911	0.991757	0.957884	0.884748	0.00630583	0.00238342	0.782779	0.998823	SEKER
40923	737.658	258.033	203.153	1.27014	0.616554	41374	228.265	0.816924	0.989099	0.945077	0.884633	0.00630534	0.00238199	0.782575	0.993982	SEKER
40953	732.474	257.844	202.852	1.27109	0.617306	41258	228.348	0.802025	0.992607	0.959204	0.885608	0.00629609	0.002389	0.784302	0.996922	SEKER
40956	733.353	262.437	198.904	1.31941	0.652354	41274	228.357	0.747031	0.992295	0.956976	0.870141	0.00640777	0.00226592	0.757145	0.998984	SEKER
40958	738.536	245.751	212.543	1.15624	0.501993	41400	228.362	0.754569	0.989324	0.943638	0.929241	0.00600008	0.00275963	0.863489	0.998401	SEKER
40962	727.564	255.623	204.279	1.25134	0.601143	41237	228.373	0.782913	0.993331	0.972408	0.893401	0.00624048	0.00245236	0.798166	0.998779	SEKER
40964	736.147	246.42	212.002	1.16235	0.509746	41354	228.379	0.766255	0.990569	0.949911	0.926786	0.00601554	0.00273761	0.858933	0.998382	SEKER
40965	745.06	255.493	204.464	1.24957	0.599633	41428	228.382	0.785312	0.988824	0.927343	0.893888	0.00623685	0.00245628	0.799036	0.998452	SEKER
40973	783.467	267.997	194.979	1.37449	0.686063	41510	228.404	0.773075	0.987063	0.838815	0.852264	0.00654082	0.00212867	0.726354	0.998366	SEKER
40983	722.675	242.2	215.596	1.1234	0.455656	41281	228.432	0.779737	0.992781	0.986115	0.943154	0.00590977	0.00288457	0.889539	0.999307	SEKER
40988	730.037	248.291	210.343	1.18041	0.531332	41396	228.446	0.754996	0.990144	0.966444	0.920075	0.00605764	0.00267779	0.846538	0.999261	SEKER
41022	728.902	253.601	206.211	1.22981	0.582081	41344	228.541	0.77953	0.992212	0.970261	0.901182	0.00618207	0.00251515	0.812129	0.998768	SEKER
41031	750.784	268.472	194.941	1.3772	0.687578	41508	228.566	0.742992	0.988508	0.914728	0.851357	0.00654316	0.00212038	0.724809	0.998207	SEKER
41033	730.988	249.932	209.363	1.19377	0.54616	41380	228.571	0.759406	0.991614	0.96499	0.914534	0.006091	0.00262825	0.836372	0.998437	SEKER
41034	742.96	272.169	192.305	1.4153	0.70765	41427	228.574	0.7805	0.990513	0.934163	0.839823	0.00663277	0.00203529	0.705304	0.998218	SEKER
41038	731.336	253.319	206.602	1.22612	0.578646	41382	228.585	0.762802	0.991687	0.964189	0.90236	0.0061728	0.00252454	0.814254	0.998376	SEKER
41044	741.688	275.961	189.767	1.45421	0.726036	41325	228.602	0.770866	0.9932	0.937599	0.828384	0.00672355	0.00195301	0.68622	0.997911	SEKER
41059	736.776	266.674	196.511	1.35705	0.676009	41387	228.644	0.787536	0.992075	0.950489	0.857389	0.0064949	0.00216504	0.735117	0.997589	SEKER
41068	727.628	233.471	224.068	1.04196	0.280937	41392	228.669	0.793677	0.992172	0.974753	0.979432	0.00568498	0.00322705	0.959287	0.999542	SEKER
41084	735.08	255.465	204.992	1.24622	0.596753	41440	228.713	0.763303	0.991409	0.955462	0.895281	0.00621812	0.0024642	0.801528	0.998883	SEKER
41087	735.676	254.437	206.014	1.23504	0.586861	41518	228.722	0.766034	0.989619	0.953984	0.898933	0.00619264	0.00249439	0.80808	0.998015	SEKER
41088	738.801	251.264	208.491	1.20516	0.558108	41488	228.724	0.76892	0.990359	0.945954	0.910297	0.00611525	0.00259016	0.82864	0.998641	SEKER
41091	738.571	256.801	203.98	1.25895	0.607513	41504	228.733	0.753535	0.990049	0.946612	0.890699	0.00624958	0.00242635	0.793344	0.998784	SEKER
41117	734.27	248.867	210.537	1.18206	0.533211	41527	228.805	0.775792	0.990127	0.95834	0.919387	0.00605266	0.00266759	0.845272	0.99916	SEKER
41126	746.459	269.424	194.601	1.38449	0.691594	41581	228.83	0.770337	0.989058	0.927501	0.849331	0.00655119	0.00210284	0.721363	0.998721	SEKER
41138	736.411	247.426	211.923	1.16753	0.516132	41560	228.864	0.788749	0.989846	0.953262	0.924978	0.00601454	0.00271586	0.855584	0.99892	SEKER
41152	733.392	258.243	203.189	1.27095	0.617193	41470	228.902	0.788791	0.992332	0.961454	0.886383	0.00627536	0.00238948	0.785674	0.998554	SEKER
41158	728.657	253.286	207.115	1.22293	0.575629	41456	228.919	0.770403	0.992812	0.974132	0.903797	0.00615399	0.00253291	0.816849	0.998946	SEKER
41169	742.126	270.214	194.2	1.39142	0.695332	41553	228.95	0.758876	0.990759	0.939344	0.84729	0.00656353	0.00208663	0.717901	0.998904	SEKER
41182	732.169	259.378	202.475	1.28104	0.625008	41483	228.986	0.781383	0.992744	0.965372	0.882828	0.00629832	0.00235999	0.779386	0.998421	SEKER
41189	733.839	249.497	210.544	1.18501	0.536539	41569	229.005	0.783418	0.990859	0.961146	0.917868	0.00605737	0.00265207	0.842482	0.998349	SEKER
41193	735.826	261.59	200.709	1.30333	0.641328	41524	229.016	0.77664	0.992029	0.956055	0.87548	0.00635034	0.00230124	0.766466	0.998956	SEKER
41197	853.7	250.901	210.064	1.1944	0.546836	42508	229.028	0.737504	0.969159	0.710338	0.912822	0.00609027	0.00260832	0.833244	0.995227	SEKER
41202	738.357	255.754	205.545	1.24427	0.595056	41593	229.042	0.759036	0.990599	0.94972	0.895555	0.00620731	0.00246293	0.802019	0.997928	SEKER
41221	740.389	250.315	210.048	1.19171	0.543927	41665	229.094	0.773667	0.989344	0.944949	0.915223	0.00607252	0.00262819	0.837633	0.998213	SEKER
41222	748.827	254.811	206.39	1.23461	0.586465	41791	229.097	0.722116	0.986385	0.923796	0.899086	0.00618143	0.00249158	0.808356	0.998002	SEKER
41226	738.928	265.787	197.635	1.34484	0.668642	41595	229.108	0.742115	0.991129	0.948805	0.862	0.00644707	0.00219569	0.743044	0.999273	SEKER
41226	769.813	264.347	198.942	1.32876	0.658499	41931	229.108	0.763841	0.983187	0.8742	0.866696	0.00641213	0.00223177	0.751162	0.998114	SEKER
41229	744.176	270.69	194.424	1.39226	0.695781	41609	229.117	0.796788	0.990867	0.935538	0.846416	0.00656553	0.00207867	0.71642	0.997446	SEKER
41243	740.629	255.222	205.942	1.23929	0.590669	41604	229.155	0.779022	0.991323	0.944841	0.897868	0.00618824	0.00248083	0.806167	0.999074	SEKER
41251	743.017	250.648	209.91	1.19408	0.546487	41836	229.178	0.793716	0.986017	0.938959	0.91434	0.00607618	0.00261963	0.836017	0.998268	SEKER
41256	736.602	260.141	202.415	1.28518	0.628143	41620	229.192	0.784678	0.991254	0.955501	0.88103	0.00630552	0.00234349	0.776213	0.997577	SEKER
41262	737.909	267.523	196.811	1.35929	0.677331	41576	229.208	0.757101	0.992448	0.952258	0.856781	0.00648351	0.00215511	0.734074	0.997818	SEKER
41265	732.882	255.718	205.675	1.24331	0.59422	41606	229.217	0.774959	0.991804	0.965436	0.896363	0.00619698	0.00246772	0.803467	0.998962	SEKER
41267	739.795	243.443	216.172	1.12616	0.459893	41734	229.222	0.774066	0.98881	0.947523	0.941583	0.00589923	0.00286028	0.886578	0.998427	SEKER
41271	742.954	263.071	200.355	1.31303	0.648048	41698	229.233	0.753739	0.98976	0.939574	0.871373	0.00637424	0.00226686	0.759291	0.996969	SEKER
41274	734.41	258.05	203.805	1.26616	0.613382	41601	229.242	0.791934	0.99214	0.961633	0.88836	0.00625213	0.00240195	0.789184	0.999237	SEKER
41276	743.692	266.999	197.298	1.35328	0.673763	41632	229.247	0.733796	0.991449	0.937824	0.858608	0.00646862	0.00216856	0.737208	0.997645	SEKER
41283	737.859	265.046	198.529	1.33505	0.662528	41610	229.267	0.767114	0.992141	0.952872	0.865008	0.00642021	0.00221722	0.748238	0.998934	SEKER
41285	743.117	261.234	201.439	1.29684	0.63671	41729	229.272	0.77304	0.98936	0.93948	0.877649	0.00632758	0.0023158	0.770268	0.998917	SEKER
41288	748.997	263.423	199.974	1.31729	0.650931	41682	229.28	0.792872	0.990547	0.924855	0.870388	0.00638014	0.00225872	0.757576	0.997944	SEKER
41301	754.588	278.04	189.398	1.46802	0.732108	41711	229.317	0.784593	0.99017	0.911487	0.824761	0.00673204	0.00192149	0.68023	0.998593	SEKER
41301	742.837	257.285	205.187	1.25391	0.60331	41673	229.317	0.780118	0.991073	0.940553	0.891293	0.00622951	0.00242503	0.794404	0.99611	SEKER
41322	738.828	262.988	200.311	1.3129	0.647961	41624	229.375	0.742774	0.992745	0.951272	0.872188	0.00636435	0.00227182	0.760712	0.998737	SEKER
41323	795.35	261.988	201	1.30342	0.641396	42072	229.378	0.739363	0.982197	0.82089	0.875526	0.00634001	0.00229798	0.766546	0.999134	SEKER
41323	763.498	264.083	199.994	1.32045	0.65305	41984	229.378	0.755393	0.984256	0.890812	0.86858	0.00639071	0.00224372	0.754431	0.996192	SEKER
41323	736.957	252.483	208.77	1.20939	0.562401	41692	229.378	0.789149	0.991149	0.956131	0.908486	0.00611	0.0025674	0.825346	0.998164	SEKER
41324	733.765	261.771	201.239	1.3008	0.639537	41613	229.38	0.790512	0.993055	0.964491	0.876262	0.00633461	0.00230375	0.767835	0.998797	SEKER
41326	742.671	273.574	192.812	1.41886	0.709416	41701	229.386	0.777887	0.991007	0.941543	0.83848	0.00661989	0.00201837	0.703049	0.997529	SEKER
41330	743.053	270.39	194.862	1.3876	0.693278	41643	229.397	0.736654	0.992484	0.940667	0.848393	0.00654222	0.00209071	0.719771	0.998751	SEKER
41332	740.092	266.328	197.922	1.34562	0.669124	41673	229.403	0.750073	0.991817	0.948254	0.861355	0.00644362	0.00218795	0.741932	0.998359	SEKER
41333	731.681	246.886	213.66	1.15551	0.501048	41715	229.405	0.791138	0.990843	0.970204	0.929195	0.0059731	0.00274667	0.863402	0.99767	SEKER
41334	734.848	261.417	201.687	1.29615	0.636213	41654	229.408	0.783138	0.992318	0.961883	0.877557	0.0063245	0.0023137	0.770106	0.998176	SEKER
41341	739.16	255.294	206.671	1.23527	0.587062	41732	229.428	0.744186	0.990631	0.950854	0.898681	0.00617531	0.00248463	0.807628	0.997636	SEKER
41346	741.288	236.423	222.875	1.06079	0.333649	41779	229.441	0.78212	0.989636	0.945517	0.970471	0.00571815	0.00312872	0.941815	0.999064	SEKER
41349	864.737	261.984	201.672	1.29906	0.638299	42172	229.45	0.730806	0.980485	0.694875	0.875817	0.00633591	0.00229955	0.767056	0.996451	SEKER
41354	745.823	268.079	196.586	1.36367	0.679891	41832	229.464	0.772914	0.988573	0.934234	0.855956	0.00648254	0.00214649	0.73266	0.999109	SEKER
41355	730.92	255.607	206.34	1.23877	0.590202	41621	229.466	0.792469	0.993609	0.972743	0.897732	0.00618079	0.00247635	0.805924	0.99835	SEKER
41355	734.84	259.108	203.5	1.27325	0.619002	41643	229.466	0.793503	0.993084	0.962393	0.885603	0.00626545	0.00237732	0.784292	0.998602	SEKER
41360	755.398	257.548	204.909	1.25689	0.605803	41893	229.48	0.774387	0.987277	0.910833	0.891018	0.00622699	0.00242105	0.793912	0.997861	SEKER
41365	737.76	246.97	213.446	1.15706	0.503045	41732	229.494	0.764702	0.991206	0.95502	0.929238	0.00597051	0.00274599	0.863483	0.999101	SEKER
41376	733.668	260.747	202.357	1.28855	0.63065	41678	229.525	0.762494	0.992754	0.96596	0.880258	0.00630189	0.00233395	0.774854	0.998437	SEKER
41378	740.424	262.185	201.317	1.30235	0.640638	41663	229.53	0.733029	0.993159	0.948459	0.875452	0.00633633	0.00229587	0.766417	0.998143	SEKER
41386	736.395	250.569	210.709	1.18917	0.541156	41768	229.552	0.772675	0.990854	0.959051	0.916126	0.00605443	0.00263071	0.839287	0.998055	SEKER
41388	750.344	263.752	200.006	1.31872	0.651891	41822	229.558	0.788043	0.989623	0.923769	0.870355	0.00637267	0.00225573	0.757518	0.998952	SEKER
41389	738.976	257.153	205.224	1.25304	0.602577	41854	229.561	0.769241	0.98889	0.952432	0.8927	0.00621308	0.00243394	0.796914	0.998563	SEKER
41390	736.073	239.659	220.022	1.08925	0.396438	41819	229.563	0.769903	0.989742	0.959983	0.957876	0.00579026	0.00300687	0.917526	0.999417	SEKER
41393	737.397	258.076	204.652	1.26105	0.609234	41782	229.572	0.762681	0.99069	0.956608	0.889551	0.00623477	0.00240815	0.791301	0.997869	SEKER
41398	741.713	258.933	203.855	1.27018	0.616585	41802	229.586	0.772928	0.990335	0.945622	0.886659	0.00625473	0.0023846	0.786164	0.998572	SEKER
41423	738.127	267.251	197.787	1.3512	0.672519	41677	229.655	0.754407	0.993906	0.955409	0.859324	0.00645175	0.00217013	0.738438	0.997781	SEKER
41433	749.935	261.174	202.531	1.28955	0.631388	42055	229.683	0.747834	0.98521	0.925783	0.879425	0.00630352	0.00232573	0.773389	0.997321	SEKER
41435	738.189	260.377	202.784	1.28401	0.627262	41767	229.688	0.790503	0.992051	0.955525	0.882137	0.00628399	0.00234725	0.778166	0.999175	SEKER
41439	740.182	254.656	207.763	1.22571	0.578254	41835	229.699	0.770815	0.990534	0.950478	0.901997	0.00614533	0.00250926	0.813599	0.997233	SEKER
41447	731.549	243.156	217.162	1.1197	0.449866	41752	229.721	0.79446	0.992695	0.973231	0.944749	0.00586667	0.00288296	0.892551	0.99939	SEKER
41454	740.397	264.377	199.85	1.32287	0.654652	41778	229.741	0.788429	0.992245	0.95027	0.86899	0.00637759	0.00224335	0.755144	0.998961	SEKER
41456	731.423	256.049	206.5	1.23995	0.591252	41733	229.746	0.805221	0.993363	0.973778	0.897275	0.0061764	0.00246955	0.805103	0.998284	SEKER
41461	737.975	259.441	203.867	1.2726	0.618491	41857	229.76	0.771468	0.990539	0.956679	0.885598	0.00625747	0.00237424	0.784284	0.998081	SEKER
41466	733.677	259.675	203.589	1.27548	0.620741	41747	229.774	0.754806	0.993269	0.968038	0.884854	0.00626235	0.00236812	0.782967	0.998662	SEKER
41493	737.428	251.159	210.75	1.19174	0.543965	41887	229.849	0.78407	0.990594	0.958838	0.915152	0.00605305	0.00261895	0.837504	0.998089	SEKER
41496	734.055	251.31	210.37	1.19461	0.547058	41823	229.857	0.7904	0.992181	0.96774	0.914637	0.00605624	0.00261443	0.83656	0.999361	SEKER
41505	735.254	255.072	207.394	1.22989	0.582151	41835	229.882	0.768412	0.992112	0.964796	0.901246	0.00614556	0.002501	0.812244	0.998971	SEKER
41506	732.16	253.962	208.246	1.21953	0.572378	41795	229.885	0.804021	0.993085	0.972991	0.905195	0.00611868	0.002534	0.819378	0.999254	SEKER
41528	732.598	254.674	207.865	1.22519	0.577771	41852	229.946	0.801823	0.992258	0.972343	0.902902	0.00613259	0.00251412	0.815232	0.998815	SEKER
41536	734.376	255.606	207.072	1.23438	0.58626	41861	229.968	0.793111	0.992236	0.967827	0.899698	0.00615384	0.00248721	0.809456	0.999177	SEKER
41536	742.954	260.906	202.927	1.28571	0.62854	41893	229.968	0.739483	0.991478	0.945607	0.881421	0.00628144	0.00233869	0.776904	0.998877	SEKER
41546	734.502	251.731	210.282	1.19711	0.549726	41893	229.996	0.778715	0.991717	0.967728	0.913657	0.00605909	0.00260447	0.83477	0.999311	SEKER
41567	740.413	241.909	219.224	1.10348	0.422799	42016	230.054	0.801833	0.989314	0.952819	0.950993	0.00581974	0.00293624	0.904387	0.997973	SEKER
41569	736.546	260.059	203.692	1.27673	0.621702	41847	230.059	0.763968	0.993357	0.962897	0.884642	0.00625609	0.00236348	0.782591	0.999154	SEKER
41574	749.958	269.326	196.742	1.36893	0.682915	42006	230.073	0.752471	0.989716	0.928876	0.854255	0.00647823	0.00212807	0.729752	0.998978	SEKER
41586	745.494	262.312	202.047	1.29827	0.637738	42002	230.106	0.743763	0.990096	0.940305	0.877224	0.0063077	0.00230406	0.769522	0.999051	SEKER
41595	747.919	269.662	197.113	1.36806	0.682418	42004	230.131	0.71371	0.990263	0.934419	0.853405	0.00648305	0.00212119	0.7283	0.996358	SEKER
41607	756.279	288.941	183.681	1.57306	0.771932	41983	230.164	0.708204	0.991044	0.914139	0.796579	0.00694453	0.0017248	0.634538	0.998164	SEKER
41616	748.956	256.668	206.915	1.24045	0.591697	42085	230.189	0.774785	0.988856	0.932304	0.896839	0.00616752	0.0024612	0.804319	0.997716	SEKER
41619	741.44	261.109	203.273	1.28453	0.627648	41975	230.198	0.796383	0.991519	0.95137	0.881614	0.0062738	0.00233789	0.777243	0.998389	SEKER
41619	813.48	274.612	193.634	1.4182	0.709089	42244	230.198	0.759942	0.985205	0.790329	0.838266	0.00659823	0.00200972	0.70269	0.996555	SEKER
41620	734.652	253.453	209.46	1.21003	0.563046	41952	230.2	0.751671	0.992086	0.969055	0.908258	0.00608969	0.0025563	0.824932	0.998193	SEKER
41626	740.681	265.122	200.073	1.32513	0.656133	41933	230.217	0.763094	0.992679	0.953481	0.868344	0.00636914	0.00223372	0.754022	0.999175	SEKER
41629	742.831	262.211	202.52	1.29474	0.635189	42053	230.225	0.761153	0.989917	0.948038	0.878016	0.00629876	0.00230911	0.770912	0.998129	SEKER
41636	742.836	252.839	210.006	1.20396	0.556882	42000	230.245	0.77627	0.991333	0.948185	0.910636	0.00607261	0.00257594	0.829258	0.998395	SEKER
41638	738.396	256.278	207.2	1.23686	0.588498	41948	230.25	0.796518	0.99261	0.959668	0.89844	0.0061549	0.00247376	0.807194	0.998387	SEKER
41641	742.564	254.829	208.794	1.22048	0.573296	42028	230.258	0.794221	0.990792	0.948993	0.903579	0.00611968	0.00251636	0.816454	0.996468	SEKER
41645	742.133	258.224	205.768	1.25493	0.604166	41965	230.27	0.788955	0.992375	0.950187	0.891742	0.00620061	0.00241864	0.795204	0.997924	SEKER
41646	741.375	260.35	203.856	1.27712	0.622008	42046	230.272	0.755483	0.990487	0.952154	0.884474	0.00625149	0.00235995	0.782294	0.999084	SEKER
41673	740.349	251.311	211.547	1.18797	0.539829	42010	230.347	0.755712	0.991978	0.955414	0.916581	0.00603055	0.00262555	0.840121	0.998036	SEKER
41723	741.176	261.354	203.797	1.28242	0.626058	42061	230.485	0.774484	0.991964	0.954427	0.881889	0.00626402	0.00233716	0.777729	0.997374	SEKER
41728	778.322	281.822	188.675	1.49369	0.742826	42280	230.499	0.783051	0.986944	0.865603	0.817888	0.00675379	0.00186424	0.668941	0.999188	SEKER
41735	735.759	257.967	206.219	1.25094	0.6008	42050	230.518	0.773988	0.992509	0.968811	0.893596	0.00618107	0.00243113	0.798513	0.998891	SEKER
41761	759.259	250.077	212.972	1.17423	0.524155	42283	230.59	0.784082	0.987655	0.910334	0.922075	0.0059883	0.00267023	0.850222	0.998355	SEKER
41768	734.841	248.212	214.345	1.158	0.504255	42091	230.609	0.782876	0.992326	0.972001	0.929082	0.00594264	0.00273134	0.863194	0.999582	SEKER
41780	744.211	257.198	207.012	1.24243	0.593441	42194	230.642	0.763077	0.990188	0.947952	0.896752	0.006156	0.00245566	0.804164	0.999114	SEKER
41781	737.016	257.864	206.606	1.24809	0.598367	42107	230.645	0.772392	0.992258	0.966573	0.894445	0.0061718	0.00243673	0.800032	0.998515	SEKER
41786	741.814	253.909	210.18	1.20805	0.561056	42121	230.659	0.734608	0.992047	0.954225	0.908433	0.0060764	0.00255269	0.825251	0.996947	SEKER
41798	744.664	259.05	206.017	1.25742	0.606243	42168	230.692	0.778883	0.991226	0.947206	0.890533	0.00619766	0.0024044	0.793048	0.997195	SEKER
41827	739.449	254.789	209.269	1.21752	0.570434	42226	230.772	0.743591	0.990551	0.96128	0.905739	0.00609149	0.00252881	0.820363	0.998806	SEKER
41836	757.765	272.099	196.168	1.38707	0.692994	42304	230.797	0.773967	0.988937	0.915569	0.848209	0.00650394	0.00207668	0.719459	0.997941	SEKER
41863	754.738	264.755	202.142	1.30975	0.645799	42324	230.871	0.784113	0.989108	0.923523	0.872021	0.00632431	0.0022558	0.76042	0.995957	SEKER
41864	739.821	253.737	210.595	1.20485	0.557799	42166	230.874	0.774542	0.992838	0.961164	0.909897	0.00606097	0.00256266	0.827913	0.997514	SEKER
41869	741.243	256.395	208.183	1.23158	0.583706	42231	230.888	0.769198	0.991428	0.957594	0.900518	0.00612373	0.00248408	0.810933	0.998729	SEKER
41869	754.125	267.658	199.423	1.34216	0.666988	42316	230.888	0.781138	0.989437	0.925158	0.862623	0.00639275	0.00218349	0.744119	0.998726	SEKER
41874	757.202	250.889	212.703	1.17953	0.530322	42388	230.902	0.749409	0.987874	0.917764	0.920334	0.00599153	0.00265154	0.847014	0.999077	SEKER
41884	748.149	267.798	199.375	1.34319	0.667625	42242	230.929	0.742703	0.991525	0.940333	0.862327	0.0063938	0.00218086	0.743608	0.998805	SEKER
41898	732.244	236.673	225.579	1.04918	0.302576	42223	230.968	0.795663	0.992303	0.981955	0.975895	0.00564879	0.00316044	0.952371	0.999208	SEKER
41913	745.189	270.281	198.077	1.36453	0.680387	42269	231.009	0.736298	0.991578	0.948475	0.854699	0.00644863	0.00212276	0.730511	0.996803	SEKER
41915	743.837	247.739	215.689	1.1486	0.491944	42296	231.015	0.78519	0.990992	0.951971	0.932491	0.00591052	0.00275666	0.869539	0.998751	SEKER
41918	750.442	280.074	190.789	1.46798	0.73209	42224	231.023	0.714714	0.992753	0.935354	0.824863	0.00668148	0.00190801	0.680399	0.998812	SEKER
41923	731.342	250.714	213.019	1.17696	0.527352	42167	231.037	0.787286	0.994213	0.984966	0.921514	0.00598035	0.0026602	0.849188	0.99946	SEKER
41924	741.282	266.576	200.375	1.33039	0.659549	42225	231.04	0.798005	0.992872	0.958751	0.866693	0.00635855	0.00221309	0.751157	0.999329	SEKER
41929	742.531	263.701	202.875	1.29982	0.638842	42257	231.053	0.800172	0.992238	0.955642	0.876194	0.00628923	0.00228654	0.767716	0.997892	SEKER
41930	752.911	273.078	195.729	1.39519	0.69733	42323	231.056	0.757543	0.990714	0.929496	0.846119	0.00651271	0.00205905	0.715917	0.998837	SEKER
41931	747.385	261.505	204.452	1.27905	0.623495	42345	231.059	0.779967	0.990223	0.943314	0.883574	0.00623655	0.00234475	0.780703	0.998562	SEKER
41942	748.883	257.158	207.97	1.23651	0.588187	42395	231.089	0.750438	0.989315	0.939791	0.898627	0.00613128	0.00246631	0.80753	0.998522	SEKER
41949	744.319	267.658	199.815	1.33953	0.665351	42263	231.108	0.738643	0.99257	0.95151	0.863447	0.00638056	0.00218767	0.745541	0.998674	SEKER
41974	754.72	285.481	187.513	1.52245	0.754035	42324	231.177	0.803084	0.99173	0.926016	0.809783	0.00680137	0.00180406	0.655749	0.998347	SEKER
41980	734.386	253.308	211.141	1.19971	0.552467	42277	231.194	0.772942	0.992975	0.978146	0.9127	0.00603401	0.00258284	0.833022	0.999384	SEKER
41986	744.924	261.561	204.782	1.27727	0.622121	42345	231.21	0.756914	0.991522	0.950803	0.883964	0.00622972	0.00234631	0.781392	0.998046	SEKER
41998	743.151	252.085	212.26	1.18762	0.539447	42377	231.243	0.789258	0.991056	0.955618	0.917325	0.0060023	0.00262174	0.841484	0.999365	SEKER
42008	738.016	248.36	215.662	1.15162	0.495961	42361	231.271	0.784683	0.991667	0.969193	0.931191	0.00591221	0.00274211	0.867117	0.998587	SEKER
42013	735.014	248.459	215.592	1.15245	0.49706	42301	231.285	0.788443	0.993192	0.977242	0.930876	0.00591386	0.00273917	0.86653	0.998633	SEKER
42018	742.118	252.885	211.911	1.19335	0.545711	42387	231.298	0.806797	0.991295	0.958737	0.914638	0.0060185	0.00259816	0.836563	0.998317	SEKER
42024	734.883	250.795	213.564	1.17433	0.524275	42312	231.315	0.788739	0.993193	0.977847	0.922328	0.00596789	0.00266405	0.850689	0.99899	SEKER
42027	741.939	262.021	204.676	1.28017	0.62435	42388	231.323	0.762464	0.991483	0.959405	0.882843	0.00623458	0.00233626	0.779411	0.997781	SEKER
42030	745.326	256.848	208.924	1.22938	0.581681	42433	231.331	0.778766	0.990503	0.950773	0.900656	0.00611106	0.00248046	0.811181	0.997251	SEKER
42033	746.014	263	203.811	1.29041	0.632028	42415	231.34	0.758171	0.990994	0.949088	0.879617	0.006257	0.00231058	0.773726	0.998427	SEKER
42041	761.435	274.301	195.308	1.40445	0.702159	42564	231.362	0.777759	0.987713	0.911207	0.84346	0.00652461	0.002037	0.711424	0.999162	SEKER
42050	776.18	265.736	201.805	1.3168	0.650602	42638	231.387	0.77033	0.986209	0.877104	0.870737	0.00631953	0.00224085	0.758183	0.998372	SEKER
42051	755.763	263.28	203.575	1.29328	0.634131	42564	231.389	0.763453	0.987948	0.925156	0.878871	0.00626097	0.00230421	0.772415	0.998951	SEKER
42054	749.694	262.3	204.335	1.28367	0.627006	42405	231.398	0.773677	0.991723	0.940262	0.882188	0.00623721	0.00233031	0.778255	0.999025	SEKER
42057	752.331	257.012	208.656	1.23175	0.583861	42501	231.406	0.760579	0.989553	0.933749	0.900369	0.00611105	0.00247729	0.810664	0.998534	SEKER
42066	762.413	268.616	199.761	1.34469	0.66855	42525	231.431	0.727282	0.989206	0.909412	0.861568	0.00638557	0.00217039	0.742299	0.998161	SEKER
42073	753.785	257.154	208.514	1.23327	0.585251	42548	231.45	0.779621	0.988836	0.930504	0.900043	0.00611209	0.00247413	0.810077	0.999045	SEKER
42078	750.704	277.247	193.747	1.43097	0.715292	42434	231.464	0.749119	0.991611	0.938269	0.834864	0.00658888	0.00197449	0.696998	0.997385	SEKER
42083	747.056	251.009	213.8	1.17404	0.523928	42492	231.477	0.752665	0.990375	0.947568	0.922187	0.00596462	0.00266096	0.850429	0.998435	SEKER
42094	743.573	267.071	201.032	1.3285	0.658331	42455	231.508	0.787569	0.991497	0.956716	0.86684	0.00634463	0.00220974	0.751411	0.99825	SEKER
42101	761.563	272.603	196.961	1.38405	0.691351	42573	231.527	0.716808	0.988913	0.912201	0.84932	0.00647497	0.00207827	0.721344	0.998374	SEKER
42120	742.557	254.865	210.603	1.21016	0.563181	42479	231.579	0.78726	0.991549	0.959928	0.908635	0.00605092	0.00254425	0.825618	0.999134	SEKER
42122	748.798	251.205	214.142	1.17308	0.522795	42516	231.585	0.784746	0.990733	0.944038	0.921895	0.00596374	0.00265721	0.849891	0.996988	SEKER
42142	741.324	260.524	206.118	1.26395	0.611597	42438	231.64	0.791488	0.993025	0.963627	0.889131	0.00618204	0.00238327	0.790553	0.999222	SEKER
42143	746.003	268.701	199.99	1.34357	0.667863	42468	231.642	0.803183	0.992347	0.951599	0.862083	0.00637593	0.0021723	0.743187	0.998525	SEKER
42156	746.626	253.299	213.248	1.18782	0.539663	42571	231.678	0.754456	0.990252	0.950305	0.914643	0.00600861	0.00259394	0.836571	0.993693	SEKER
42158	762.389	273.026	197.093	1.38527	0.692015	42624	231.683	0.735241	0.989067	0.911458	0.848578	0.00647625	0.00207143	0.720084	0.997508	SEKER
42160	751.793	276.447	194.58	1.42074	0.71034	42462	231.689	0.778779	0.992888	0.937376	0.838095	0.00655709	0.00199556	0.702404	0.997932	SEKER
42173	759.369	248.706	216.765	1.14735	0.490267	42736	231.725	0.744159	0.986826	0.919049	0.931721	0.00589728	0.00274142	0.868104	0.996021	SEKER
42173	741.927	259.627	207.038	1.25401	0.603393	42526	231.725	0.7997	0.991699	0.962769	0.89253	0.00615623	0.00240983	0.79661	0.998955	SEKER
42174	754.05	248.553	216.359	1.1488	0.49221	42734	231.727	0.785012	0.986896	0.932083	0.932307	0.00589351	0.00274656	0.869196	0.998529	SEKER
42175	742.742	252.731	213.046	1.18628	0.537954	42638	231.73	0.745879	0.989141	0.960703	0.916904	0.00599244	0.00261264	0.840713	0.997318	SEKER
42177	751.217	272.118	197.532	1.37759	0.687796	42504	231.736	0.730338	0.992307	0.939193	0.851599	0.00645182	0.00209316	0.725221	0.999059	SEKER
42178	746.834	271.337	198.178	1.36916	0.683044	42484	231.738	0.74526	0.992797	0.950271	0.854062	0.00643313	0.00211135	0.729423	0.998693	SEKER
42179	738.57	253.449	212.079	1.19507	0.547552	42529	231.741	0.788938	0.99177	0.971679	0.914351	0.00600889	0.00259075	0.836037	0.999122	SEKER
42192	758.318	245.218	219.32	1.11808	0.447293	42784	231.777	0.774449	0.986163	0.922013	0.945188	0.00581195	0.00286137	0.89338	0.998873	SEKER
42202	749.097	255.078	211.314	1.2071	0.56009	42655	231.804	0.774036	0.98938	0.945076	0.90876	0.00604421	0.00254282	0.825845	0.996877	SEKER
42209	749.314	262.25	205.2	1.27802	0.622702	42613	231.824	0.763522	0.990519	0.944685	0.883979	0.00621313	0.00234023	0.781419	0.998671	SEKER
42210	747.163	268.837	200.046	1.34388	0.66805	42536	231.826	0.770537	0.992336	0.950155	0.862332	0.00636903	0.00217245	0.743616	0.999327	SEKER
42218	741.094	249.392	215.769	1.15583	0.501461	42547	231.848	0.774202	0.992267	0.965964	0.929656	0.00590723	0.00272178	0.86426	0.998936	SEKER
42219	740.738	263.204	204.631	1.28623	0.628929	42512	231.851	0.775628	0.993108	0.966916	0.88088	0.00623425	0.00231542	0.775949	0.998053	SEKER
42223	736.821	250.666	215.079	1.16546	0.513602	42491	231.862	0.751754	0.993693	0.977316	0.924983	0.00593672	0.00268078	0.855593	0.997161	SEKER
42230	759.426	282.103	190.885	1.47787	0.736305	42626	231.881	0.784653	0.99071	0.920153	0.821975	0.00668014	0.00188105	0.675643	0.998512	SEKER
42247	743.56	265.959	202.514	1.31329	0.648225	42535	231.928	0.758678	0.993229	0.960227	0.872043	0.00629534	0.0022457	0.760459	0.998701	SEKER
42248	739.448	257.282	209.374	1.22882	0.581157	42578	231.931	0.77542	0.99225	0.970959	0.901465	0.0060898	0.00248073	0.81264	0.998585	SEKER
42277	743.905	269.408	200.033	1.34681	0.669854	42559	232.01	0.79468	0.993374	0.960017	0.861187	0.00637244	0.0021621	0.741643	0.998855	SEKER
42280	746.427	261.194	206.31	1.26603	0.613271	42627	232.018	0.781487	0.99186	0.953609	0.888299	0.00617772	0.00237271	0.789075	0.998991	SEKER
42297	740.845	250.152	215.623	1.16014	0.506962	42628	232.065	0.766028	0.992235	0.968422	0.927695	0.00591419	0.00270207	0.860618	0.998434	SEKER
42297	756.137	266.42	202.482	1.31577	0.649913	42716	232.065	0.754657	0.990191	0.929648	0.871049	0.0062988	0.0022367	0.758727	0.998314	SEKER
42301	744.344	255.12	211.318	1.20728	0.560276	42647	232.076	0.76273	0.991887	0.95943	0.909672	0.00603107	0.0025475	0.827504	0.999032	SEKER
42302	748.595	263.117	205.079	1.283	0.626501	42695	232.079	0.760923	0.990795	0.948586	0.882037	0.00621996	0.00232228	0.777989	0.998163	SEKER
42307	741.757	262.228	205.77	1.27438	0.619879	42592	232.093	0.75333	0.993309	0.966271	0.885079	0.00619822	0.00234625	0.783365	0.998302	SEKER
42312	751.298	256.844	210.184	1.222	0.574745	42692	232.106	0.774945	0.991099	0.941996	0.903686	0.00607024	0.00249722	0.816649	0.997943	SEKER
42315	759.195	255.143	211.473	1.2065	0.559483	42847	232.114	0.760856	0.987584	0.922566	0.909744	0.0060296	0.00254768	0.827634	0.998543	SEKER
42315	744.441	256.924	210.099	1.22287	0.575576	42644	232.114	0.798396	0.992285	0.959497	0.903435	0.00607171	0.00249505	0.816195	0.998101	SEKER
42320	750.314	257.711	209.811	1.22831	0.580683	42728	232.128	0.760331	0.990451	0.944647	0.900729	0.00608959	0.00247255	0.811313	0.99654	SEKER
42324	745.45	253.755	212.866	1.19209	0.544342	42666	232.139	0.784286	0.991984	0.957105	0.914817	0.00599553	0.00259026	0.83689	0.997647	SEKER
42338	744.146	258.735	208.628	1.24018	0.591456	42717	232.178	0.750594	0.991128	0.96078	0.897355	0.00611119	0.00244435	0.805247	0.998647	SEKER
42339	741.226	260.199	207.306	1.25514	0.604347	42676	232.18	0.771202	0.992103	0.968387	0.892317	0.00614562	0.00240338	0.79623	0.999383	SEKER
42365	746.022	264.529	204.538	1.2933	0.634146	42728	232.252	0.769405	0.991504	0.956563	0.877981	0.00624405	0.00228868	0.77085	0.996943	SEKER
42370	753.514	260.382	207.541	1.2546	0.603895	42766	232.265	0.751908	0.99074	0.937747	0.892018	0.00614543	0.00240009	0.795697	0.998285	SEKER
42379	759.965	251.038	215.218	1.16643	0.514795	42840	232.29	0.763586	0.989239	0.92209	0.925319	0.00592363	0.00267876	0.856216	0.99872	SEKER
42412	752.034	246.965	218.819	1.12862	0.463619	42848	232.38	0.771436	0.989824	0.942375	0.940945	0.005823	0.00281568	0.885378	0.999259	SEKER
42435	757.59	266.859	202.652	1.31684	0.65063	42788	232.443	0.757768	0.99175	0.929107	0.871034	0.00628866	0.00223294	0.758699	0.999084	SEKER
42453	742.904	258.356	209.511	1.23314	0.585133	42776	232.493	0.782876	0.992449	0.966613	0.899892	0.0060857	0.00246179	0.809806	0.998605	SEKER
42455	739.126	251.474	215.283	1.16811	0.516833	42756	232.498	0.778548	0.99296	0.976566	0.924542	0.00592331	0.00266962	0.854777	0.998471	SEKER
42461	747.718	265.852	203.446	1.30674	0.64372	42808	232.515	0.759915	0.991894	0.954387	0.874601	0.00626109	0.0022598	0.764926	0.999562	SEKER
42468	754.241	261.393	207.322	1.26081	0.609039	42937	232.534	0.774059	0.989077	0.938105	0.889593	0.00615507	0.00237782	0.791376	0.997775	SEKER
42492	747.511	268.394	201.768	1.33021	0.659437	42859	232.599	0.764905	0.991437	0.955613	0.866636	0.00631633	0.00219781	0.751058	0.999066	SEKER
42502	758.807	264.67	204.636	1.29337	0.634195	42908	232.627	0.756721	0.990538	0.927591	0.878932	0.00622723	0.00229243	0.772522	0.999158	SEKER
42506	748.99	259.418	209.126	1.24048	0.59173	42916	232.638	0.799947	0.990446	0.952156	0.896767	0.0061031	0.00243472	0.804192	0.997587	SEKER
42515	763.56	237.021	228.691	1.03642	0.262774	43038	232.662	0.769865	0.987848	0.916359	0.981611	0.005575	0.00319288	0.96356	0.998656	SEKER
42516	758.388	279.193	194.216	1.43754	0.718398	42878	232.665	0.726521	0.991557	0.928922	0.833348	0.00656678	0.00195361	0.694468	0.998327	SEKER
42528	746.807	258.974	209.397	1.23676	0.588405	42883	232.698	0.788066	0.991722	0.958226	0.89854	0.00608948	0.00244855	0.807373	0.998525	SEKER
42535	743.443	261.67	207.221	1.26276	0.610628	42835	232.717	0.76064	0.992996	0.967077	0.889354	0.00615187	0.00237403	0.790951	0.998779	SEKER
42567	751.032	262.572	207.161	1.26748	0.614433	42989	232.805	0.788044	0.990184	0.948344	0.886631	0.00616844	0.00235141	0.786115	0.996383	SEKER
42586	746.12	247.448	219.312	1.12829	0.463124	42974	232.857	0.78095	0.990971	0.961301	0.941031	0.00581056	0.00281069	0.885539	0.999149	SEKER
42590	755.861	277.157	196.378	1.41134	0.705665	42922	232.867	0.69252	0.992265	0.936771	0.840201	0.00650756	0.00200046	0.705937	0.996319	SEKER
42615	748.901	271.553	200.118	1.35696	0.675959	42914	232.936	0.768253	0.993033	0.954824	0.857792	0.00637224	0.00212814	0.735807	0.998464	SEKER
42616	748.262	258.002	210.625	1.22493	0.577527	42976	232.939	0.774273	0.991623	0.956478	0.902855	0.00605411	0.00248144	0.815148	0.998501	SEKER
42627	747.405	253.59	214.362	1.183	0.534281	42968	232.969	0.768054	0.992064	0.958921	0.918681	0.00594905	0.00261389	0.843975	0.998424	SEKER
42633	755.012	259.674	209.646	1.23863	0.59008	43078	232.985	0.749525	0.98967	0.939827	0.897222	0.00609091	0.00243479	0.805008	0.997106	SEKER
42642	753.58	258.864	209.903	1.23325	0.585237	43052	233.01	0.780846	0.990477	0.943602	0.900123	0.00607064	0.00245823	0.810221	0.999209	SEKER
42642	765.967	269.816	201.553	1.33868	0.66482	43139	233.01	0.7701	0.988479	0.913329	0.863589	0.00632746	0.00217088	0.745785	0.998369	SEKER
42651	755.515	270.998	200.552	1.35126	0.672549	43001	233.034	0.784256	0.991861	0.938973	0.859913	0.00635384	0.00214305	0.73945	0.999185	SEKER
42659	750.109	250.894	217.154	1.15538	0.500876	43069	233.056	0.741896	0.99048	0.952734	0.928901	0.00588139	0.00270108	0.862857	0.996925	SEKER
42659	761.493	268.343	203.35	1.31961	0.652486	43075	233.056	0.791124	0.990342	0.924461	0.868502	0.00629041	0.00220771	0.754296	0.995374	SEKER
42670	744.706	261.424	208.103	1.25622	0.605249	42964	233.086	0.785241	0.993157	0.966858	0.891603	0.00612664	0.0023883	0.794956	0.998643	SEKER
42687	753.464	265.304	205.037	1.29393	0.634604	43021	233.133	0.7672	0.992236	0.944888	0.878737	0.00621511	0.00228593	0.772178	0.999146	SEKER
42697	759.155	271.543	200.433	1.35478	0.674663	43083	233.16	0.736663	0.991041	0.930993	0.858648	0.00635977	0.00213246	0.737276	0.998849	SEKER
42703	746.486	257.22	211.606	1.21556	0.568526	43082	233.176	0.780106	0.991203	0.962997	0.906524	0.00602347	0.00250925	0.821785	0.998931	SEKER
42708	751.454	268.986	202.328	1.32945	0.658949	43057	233.19	0.787476	0.991894	0.950417	0.866921	0.00629827	0.00219441	0.751551	0.999153	SEKER
42713	830.978	271.757	200.602	1.3547	0.674616	43271	233.204	0.769937	0.987105	0.777304	0.858133	0.00636239	0.00212823	0.736393	0.997594	SEKER
42714	751.259	266.471	204.46	1.30329	0.641303	43016	233.206	0.757663	0.992979	0.951044	0.875164	0.0062385	0.00225745	0.765912	0.998208	SEKER
42715	756.895	257.085	211.978	1.21279	0.5658	43190	233.209	0.778037	0.989002	0.936956	0.907126	0.00601862	0.0025139	0.822878	0.997982	SEKER
42719	744.219	258.698	210.68	1.22792	0.580327	43060	233.22	0.790156	0.992081	0.969236	0.901513	0.00605581	0.0024674	0.812726	0.997964	SEKER
42730	748.355	260.912	208.768	1.24977	0.599804	43110	233.25	0.75448	0.991185	0.958799	0.893981	0.00610605	0.00240576	0.799202	0.998819	SEKER
42741	761.007	275.248	198.119	1.38931	0.694201	43261	233.28	0.773243	0.98798	0.927422	0.847525	0.00643991	0.00204961	0.718299	0.99794	SEKER
42743	771.732	268.963	202.878	1.32574	0.656535	43327	233.285	0.742105	0.986521	0.901866	0.86735	0.00629257	0.00219677	0.752296	0.99735	SEKER
42743	748.893	265.375	205.247	1.29295	0.633889	43104	233.285	0.745431	0.991625	0.957713	0.879078	0.00620862	0.0022871	0.772779	0.999166	SEKER
42745	756.589	252.422	215.933	1.16898	0.517896	43206	233.291	0.79845	0.98933	0.938372	0.924208	0.00590531	0.00265768	0.854161	0.998501	SEKER
42749	744.594	257.723	211.778	1.21695	0.569882	43052	233.302	0.745301	0.992962	0.96894	0.905243	0.00602875	0.00249728	0.819464	0.997247	SEKER
42764	752.754	264.641	205.928	1.28511	0.628088	43159	233.343	0.772304	0.990848	0.948379	0.881733	0.00618841	0.00230731	0.777452	0.999114	SEKER
42767	763.098	250.374	217.59	1.15067	0.494712	43298	233.351	0.777582	0.987736	0.922907	0.932008	0.00585438	0.00272483	0.868638	0.999518	SEKER
42772	753.505	269.375	202.618	1.32947	0.65896	43098	233.365	0.782338	0.992436	0.946667	0.866317	0.00629794	0.00218819	0.750505	0.997776	SEKER
42779	746.717	264.34	206.186	1.28205	0.625777	43102	233.384	0.763911	0.992506	0.964114	0.882891	0.0061792	0.00231601	0.779497	0.999352	SEKER
42794	745.798	259.522	210.259	1.23429	0.586181	43098	233.425	0.786481	0.992946	0.96683	0.899442	0.00606444	0.00244829	0.808996	0.998538	SEKER
42805	759.767	280.214	194.727	1.43901	0.719086	43198	233.455	0.768699	0.990902	0.931845	0.833128	0.0065463	0.00194546	0.694103	0.998822	SEKER
42811	752.58	266.854	204.811	1.30293	0.641047	43170	233.471	0.778354	0.991684	0.949861	0.874903	0.00623329	0.00225287	0.765455	0.997333	SEKER
42820	750.13	265.142	206.306	1.28519	0.628147	43166	233.495	0.802775	0.991984	0.956276	0.880642	0.00619202	0.00229726	0.77553	0.996705	SEKER
42824	747.535	266.989	204.371	1.30639	0.643477	43142	233.506	0.787437	0.992629	0.963017	0.874592	0.00623456	0.00225013	0.764912	0.999277	SEKER
42836	755.253	272.493	200.813	1.35695	0.675948	43192	233.539	0.72297	0.991758	0.9437	0.857046	0.00636131	0.00211711	0.734528	0.996715	SEKER
42846	748.792	269.057	203.137	1.32451	0.655728	43131	233.566	0.786396	0.993392	0.96028	0.868092	0.00627963	0.00219977	0.753584	0.998128	SEKER
42863	742.672	258.754	211.139	1.22552	0.578076	43143	233.613	0.794274	0.99351	0.976559	0.902836	0.00603677	0.00247412	0.815113	0.998934	SEKER
42883	752.306	258.7	211.229	1.22474	0.577344	43202	233.667	0.78644	0.992616	0.952151	0.903235	0.0060327	0.00247682	0.815833	0.999181	SEKER
42888	750.734	253.172	215.832	1.173	0.522707	43254	233.681	0.792857	0.991538	0.956254	0.923012	0.00590309	0.00264295	0.851952	0.999342	SEKER
42911	764.207	285.994	191.352	1.4946	0.743195	43321	233.743	0.751888	0.990536	0.923329	0.817301	0.00666483	0.00183441	0.66798	0.998364	SEKER
42927	751.413	260.517	210.118	1.23986	0.591177	43276	233.787	0.778792	0.991935	0.955395	0.897395	0.00606884	0.00242784	0.805318	0.998483	SEKER
42932	750.704	270.424	202.351	1.33641	0.663392	43263	233.801	0.760195	0.992349	0.957312	0.864569	0.0062989	0.00217092	0.74748	0.998941	SEKER
42946	751.381	258.6	211.657	1.22179	0.574546	43341	233.839	0.761535	0.990886	0.955899	0.904248	0.00602152	0.00248334	0.817664	0.999012	SEKER
42974	755.268	253.468	216.271	1.17199	0.521505	43417	233.915	0.764336	0.989797	0.946702	0.922859	0.00589816	0.00263899	0.851668	0.998149	SEKER
42998	748.297	258.413	212.142	1.21811	0.571011	43376	233.98	0.779415	0.991286	0.964962	0.905452	0.00600987	0.00249177	0.819844	0.998661	SEKER
43027	775.195	244.134	224.703	1.08647	0.390958	43738	234.059	0.783477	0.983744	0.899765	0.958734	0.00567396	0.00295705	0.919171	0.998655	SEKER
43033	746.785	259.643	211.835	1.22569	0.578237	43303	234.075	0.744722	0.993765	0.969662	0.901528	0.00603358	0.00245851	0.812753	0.996181	SEKER
43059	765.563	272.927	201.056	1.35747	0.676257	43472	234.146	0.774526	0.9905	0.923234	0.857907	0.00633845	0.00211799	0.736004	0.999101	SEKER
43061	773.258	290.42	189.098	1.53581	0.758974	43491	234.152	0.704163	0.990113	0.904993	0.806252	0.00674438	0.00175795	0.650043	0.998344	SEKER
43066	762.089	276.479	198.446	1.39322	0.69629	43430	234.165	0.776062	0.991619	0.931822	0.846955	0.00641989	0.00203774	0.717333	0.999404	SEKER
43113	753.398	260.922	210.878	1.23731	0.588901	43517	234.293	0.798907	0.990716	0.954485	0.897942	0.00605205	0.00242703	0.8063	0.997643	SEKER
43113	745.717	251.365	218.703	1.14934	0.492944	43461	234.293	0.771073	0.991993	0.974249	0.932081	0.00583039	0.00271451	0.868775	0.998522	SEKER
43125	755.011	265.47	206.948	1.28279	0.626337	43467	234.326	0.748698	0.992132	0.950676	0.882682	0.00615583	0.00230506	0.779127	0.999454	SEKER
43132	745.585	258.004	213.004	1.21126	0.564277	43433	234.345	0.783805	0.99307	0.975024	0.908298	0.00598173	0.00251142	0.825005	0.999297	SEKER
43144	765.795	258.034	213.19	1.21035	0.563361	43652	234.377	0.75224	0.988363	0.924496	0.90832	0.00598075	0.00251126	0.825045	0.99859	SEKER
43157	749.909	261.273	210.54	1.24097	0.592157	43478	234.412	0.771763	0.992617	0.964371	0.897194	0.00605401	0.00241974	0.804957	0.998926	SEKER
43165	755.211	271.809	202.579	1.34175	0.666732	43482	234.434	0.755729	0.99271	0.951054	0.862496	0.00629698	0.00214951	0.743899	0.998123	SEKER
43181	755.838	261.113	210.748	1.23899	0.590399	43561	234.478	0.78184	0.991277	0.949828	0.897992	0.00604695	0.00242552	0.806389	0.999105	SEKER
43196	750.694	256.755	214.506	1.19696	0.54957	43547	234.518	0.789098	0.99194	0.963224	0.913393	0.00594396	0.00255203	0.834286	0.99861	SEKER
43204	781.451	263.351	209.882	1.25476	0.604026	44006	234.54	0.729181	0.981775	0.889058	0.890598	0.00609553	0.00236547	0.793164	0.995232	SEKER
43209	756.121	268.348	205.58	1.30532	0.642728	43543	234.554	0.750625	0.992329	0.949733	0.874067	0.00621045	0.00223605	0.763993	0.997256	SEKER
43220	747.775	252.025	218.859	1.15154	0.49586	43537	234.583	0.779582	0.992719	0.971299	0.930794	0.00583122	0.00269993	0.866377	0.997668	SEKER
43231	750.007	263.981	208.741	1.26463	0.612148	43567	234.613	0.78649	0.992288	0.965772	0.88875	0.0061063	0.00235004	0.789876	0.998904	SEKER
43236	751.588	252.648	218.222	1.15776	0.503939	43630	234.627	0.772071	0.99097	0.961824	0.928672	0.00584346	0.00268101	0.862431	0.998485	SEKER
43238	754.895	267.659	205.931	1.29975	0.638792	43630	234.632	0.77557	0.991015	0.95346	0.87661	0.00619036	0.00225487	0.768446	0.998786	SEKER
43242	753.985	256.333	215.027	1.1921	0.544352	43702	234.643	0.791282	0.989474	0.955851	0.915385	0.00592787	0.0025674	0.837929	0.998894	SEKER
43250	748.18	258.7	213.131	1.21381	0.566804	43565	234.665	0.796912	0.992769	0.970921	0.907093	0.0059815	0.00249802	0.822817	0.998743	SEKER
43287	754.888	260.056	212.244	1.22527	0.577843	43653	234.765	0.753394	0.991616	0.954558	0.90275	0.00600771	0.00246127	0.814958	0.998542	SEKER
43289	752.142	263.477	209.491	1.2577	0.606479	43618	234.771	0.782308	0.992457	0.961585	0.891046	0.00608648	0.00236672	0.793964	0.998572	SEKER
43290	750.678	252.756	218.462	1.15698	0.502938	43615	234.773	0.784395	0.992548	0.965362	0.928855	0.00583866	0.00268092	0.862771	0.998205	SEKER
43303	762.695	265.164	208.437	1.27215	0.618139	43727	234.809	0.749576	0.990303	0.935462	0.885521	0.00612346	0.00232259	0.784148	0.997556	SEKER
43305	778.579	255.215	216.416	1.17928	0.530036	43833	234.814	0.791914	0.987954	0.897723	0.920062	0.00589344	0.00260506	0.846514	0.998278	SEKER
43329	754.79	265.287	208.174	1.27435	0.619861	43707	234.879	0.765855	0.991351	0.955732	0.885379	0.00612261	0.00232077	0.783896	0.99896	SEKER
43334	751.813	263.488	209.769	1.25609	0.605136	43677	234.893	0.781638	0.992147	0.963427	0.891473	0.00608041	0.00236889	0.794724	0.998243	SEKER
43357	761.958	264.004	209.362	1.261	0.60919	43842	234.955	0.787736	0.988938	0.938441	0.889966	0.00608908	0.00235627	0.79204	0.998759	SEKER
43362	751.489	263.161	210.247	1.25167	0.601422	43682	234.969	0.76514	0.992674	0.964881	0.892871	0.00606893	0.00237928	0.797218	0.997855	SEKER
43373	768.891	280.036	197.482	1.41803	0.709006	43813	234.998	0.721488	0.989957	0.921934	0.839172	0.00645646	0.00197505	0.704209	0.998591	SEKER
43373	762.115	282.226	195.885	1.44078	0.719907	43690	234.998	0.767053	0.992744	0.938401	0.83266	0.00650695	0.00192943	0.693323	0.998923	SEKER
43379	757.02	274.985	201.051	1.36774	0.682233	43734	235.015	0.793441	0.991883	0.951206	0.854646	0.00633912	0.00208619	0.730419	0.999022	SEKER
43402	767.442	267.518	206.738	1.29399	0.634648	43872	235.077	0.756462	0.989287	0.926037	0.878733	0.00616372	0.002267	0.772172	0.999185	SEKER
43407	766.597	267.184	207.4	1.28825	0.630432	43864	235.09	0.780421	0.989581	0.928187	0.879884	0.00615531	0.00227578	0.774195	0.997361	SEKER
43413	755.879	256.982	215.542	1.19226	0.54453	43828	235.107	0.768889	0.990531	0.954828	0.914875	0.00591948	0.00255806	0.836996	0.99792	SEKER
43434	767.911	269.438	205.468	1.31134	0.646896	43900	235.164	0.757958	0.989385	0.925588	0.872793	0.00620339	0.00222052	0.761768	0.998937	SEKER
43435	756.574	261.266	212.142	1.23156	0.583689	43926	235.166	0.773415	0.988822	0.953557	0.900102	0.00601511	0.00243551	0.810183	0.99779	SEKER
43460	753.432	262.521	210.996	1.2442	0.594993	43812	235.234	0.778769	0.991966	0.962081	0.896059	0.00604051	0.00240215	0.802922	0.998993	SEKER
43479	750.885	256.212	216.233	1.18489	0.536403	43875	235.285	0.792487	0.990974	0.969042	0.918324	0.00589277	0.00258513	0.843318	0.999237	SEKER
43483	751.215	250.16	221.56	1.12908	0.464309	43837	235.296	0.770975	0.991925	0.96828	0.940582	0.00575305	0.00277757	0.884695	0.998895	SEKER
43485	758.113	265.533	208.899	1.27111	0.617318	43876	235.302	0.758265	0.991089	0.950783	0.886148	0.00610632	0.00232265	0.785258	0.998149	SEKER
43504	759.998	246.001	225.338	1.0917	0.401169	43929	235.353	0.773404	0.990325	0.946486	0.956714	0.00565468	0.00292225	0.915302	0.999234	SEKER
43520	760.012	271.067	204.751	1.32388	0.655317	43900	235.396	0.792541	0.991344	0.946799	0.868406	0.00622856	0.00218504	0.754129	0.998379	SEKER
43524	764.419	283.777	195.555	1.45114	0.724654	43869	235.407	0.715385	0.992136	0.936	0.829549	0.00652002	0.00190457	0.688151	0.998604	SEKER
43525	762.479	282.82	196.118	1.44209	0.720517	43861	235.41	0.78565	0.992339	0.94079	0.832365	0.00649789	0.00192401	0.692831	0.999125	SEKER
43567	753.988	262.887	211.487	1.24304	0.59398	43956	235.523	0.771152	0.99115	0.963027	0.895911	0.00603408	0.00239801	0.802657	0.997734	SEKER
43616	752.431	262.557	211.706	1.2402	0.591474	43970	235.656	0.78826	0.991949	0.968105	0.89754	0.00601975	0.00240976	0.805578	0.999076	SEKER
43625	782.4	282.358	197.096	1.43259	0.716061	44149	235.68	0.766925	0.988131	0.895545	0.834686	0.00647238	0.00193792	0.696701	0.998084	SEKER
43626	760.859	264.489	210.324	1.25753	0.606336	44036	235.683	0.764416	0.990689	0.946993	0.891086	0.00606265	0.00235788	0.794035	0.998523	SEKER
43634	772.146	257.397	216.479	1.18902	0.540986	44106	235.704	0.778817	0.989299	0.919679	0.915721	0.00589901	0.00255866	0.838546	0.997044	SEKER
43638	767.847	268.272	207.676	1.29178	0.633034	44135	235.715	0.741475	0.988739	0.930091	0.878643	0.00614767	0.00226016	0.772013	0.997273	SEKER
43650	770.305	269.586	206.422	1.306	0.643199	44071	235.748	0.750129	0.990447	0.924419	0.874479	0.00617609	0.00222787	0.764713	0.998712	SEKER
43655	762.04	259.588	214.298	1.21134	0.564356	44077	235.761	0.782236	0.990426	0.944688	0.908213	0.00594635	0.00249564	0.824852	0.999176	SEKER
43657	760.603	261.441	212.903	1.22798	0.580377	44058	235.766	0.778644	0.990898	0.948304	0.901798	0.00598851	0.00244307	0.813239	0.998639	SEKER
43658	776.121	266.485	209.35	1.27291	0.618735	44291	235.769	0.810402	0.985708	0.910783	0.884737	0.00610392	0.00230699	0.78276	0.996385	SEKER
43661	755.49	259.72	214.312	1.21188	0.564889	44011	235.777	0.795804	0.992047	0.961272	0.907813	0.00594856	0.00249217	0.824125	0.998738	SEKER
43662	767.382	264.361	210.683	1.25478	0.604042	44131	235.78	0.786802	0.989373	0.93173	0.891886	0.00605471	0.00236326	0.795461	0.998129	SEKER
43665	764.364	274.055	203.119	1.34924	0.671328	44090	235.788	0.781183	0.990361	0.939167	0.860367	0.00627631	0.00212138	0.740231	0.998746	SEKER
43670	764.703	269.244	206.67	1.30277	0.640936	44057	235.802	0.768703	0.991216	0.938442	0.875792	0.00616542	0.00223741	0.767012	0.999241	SEKER
43672	756.109	262.805	211.753	1.24109	0.592266	44007	235.807	0.799707	0.992388	0.95994	0.89727	0.0060177	0.00240604	0.805094	0.999195	SEKER
43672	754.739	255.228	218.142	1.17001	0.519136	44066	235.807	0.771454	0.991059	0.963428	0.923905	0.00584421	0.00262673	0.853601	0.998724	SEKER
43678	766.754	266.203	209.796	1.26887	0.615541	44143	235.823	0.784405	0.989466	0.933599	0.885879	0.00609466	0.0023154	0.784781	0.995782	SEKER
43683	755.258	256.927	216.574	1.18633	0.538009	44054	235.837	0.788901	0.991579	0.962347	0.917914	0.00588162	0.00257563	0.842566	0.999557	SEKER
43685	764.629	260.279	213.967	1.21645	0.569392	44142	235.842	0.77073	0.989647	0.938946	0.906111	0.0059581	0.00247749	0.821037	0.998748	SEKER
43688	763.553	263.244	211.488	1.24472	0.595447	44089	235.85	0.781818	0.990905	0.941659	0.895939	0.00602553	0.00239491	0.802707	0.999144	SEKER
43690	755.343	264.955	210.215	1.2604	0.608705	44039	235.856	0.758836	0.992075	0.962285	0.890171	0.00606444	0.0023489	0.792405	0.99875	SEKER
43691	758.261	253.769	219.366	1.15683	0.502755	44127	235.858	0.770945	0.990119	0.954914	0.92942	0.00580827	0.00267347	0.863821	0.999297	SEKER
43701	770.263	276.476	201.484	1.3722	0.684771	44144	235.885	0.74329	0.989965	0.9256	0.853186	0.00632653	0.00206786	0.727926	0.998858	SEKER
43712	759.328	261.08	213.679	1.22183	0.574585	44059	235.915	0.786286	0.992124	0.95269	0.903613	0.00597272	0.0024563	0.816517	0.997644	SEKER
43713	759.502	274.732	202.847	1.35438	0.674422	44048	235.918	0.773025	0.992395	0.952276	0.858721	0.00628489	0.00210807	0.737401	0.99872	SEKER
43741	755.847	260.693	213.923	1.21863	0.571515	44085	235.993	0.756634	0.992197	0.962123	0.905252	0.00595993	0.00246888	0.819481	0.998647	SEKER
43752	771.484	283.655	196.593	1.44285	0.720869	44112	236.023	0.772212	0.991839	0.923749	0.832078	0.00648324	0.00191702	0.692353	0.998963	SEKER
43753	782.625	269.718	206.839	1.304	0.641799	44377	236.026	0.782491	0.985939	0.897657	0.875084	0.00616455	0.00222987	0.765772	0.998565	SEKER
43780	771.185	273.27	204.197	1.33827	0.664562	44206	236.098	0.788999	0.990363	0.925057	0.863973	0.0062419	0.00214535	0.74645	0.998951	SEKER
43791	759.364	274.311	203.723	1.34649	0.669658	44075	236.128	0.734946	0.993556	0.954322	0.860803	0.0062641	0.00212155	0.740982	0.997727	SEKER
43796	766.59	276.29	202.008	1.36772	0.682221	44236	236.141	0.765129	0.990053	0.936522	0.854688	0.00630856	0.00207654	0.730492	0.999105	SEKER
43805	773.977	293.606	190.295	1.5429	0.761531	44195	236.166	0.745211	0.991175	0.918919	0.804363	0.00670257	0.00173073	0.646999	0.998257	SEKER
43824	756.08	264.11	211.638	1.24793	0.59823	44183	236.217	0.75144	0.991875	0.963355	0.89439	0.0060266	0.00237881	0.799933	0.998263	SEKER
43828	761.709	268.66	208.146	1.29073	0.63226	44224	236.228	0.802711	0.991046	0.949256	0.879281	0.00612987	0.00226018	0.773135	0.997908	SEKER
43832	754.068	255.898	218.669	1.17025	0.51942	44167	236.239	0.804744	0.992415	0.96868	0.923176	0.00583815	0.00261573	0.852253	0.997348	SEKER
43833	764.879	273.552	204.436	1.33808	0.66444	44246	236.241	0.742316	0.990666	0.941511	0.863608	0.00624077	0.00214133	0.745818	0.997962	SEKER
43865	762.654	275.572	202.806	1.35879	0.677039	44217	236.327	0.763507	0.992039	0.947704	0.857589	0.00628227	0.00209611	0.735459	0.999337	SEKER
43879	765.193	268.781	208.311	1.29029	0.631934	44259	236.365	0.755597	0.991414	0.941726	0.879396	0.00612551	0.00225975	0.773338	0.997826	SEKER
43880	758.336	275.648	202.969	1.35808	0.676619	44179	236.368	0.796746	0.993232	0.958855	0.8575	0.00628185	0.00209509	0.735306	0.998605	SEKER
43880	756.327	256.245	218.663	1.17188	0.521366	44263	236.368	0.769582	0.991347	0.963956	0.922427	0.00583969	0.00260794	0.850872	0.997116	SEKER
43912	760.634	264.376	211.948	1.24737	0.59774	44312	236.454	0.780908	0.990973	0.953766	0.894384	0.00602059	0.00237638	0.799923	0.997796	SEKER
43917	758.75	253.671	220.766	1.14905	0.492549	44382	236.467	0.763522	0.989523	0.958617	0.93218	0.00577616	0.00269041	0.86896	0.998478	SEKER
43917	762.456	267.022	210.097	1.27094	0.617186	44291	236.467	0.77023	0.991556	0.949321	0.885574	0.00608015	0.00230671	0.784241	0.996726	SEKER
43919	813.374	276.466	202.595	1.36462	0.680441	44428	236.473	0.770644	0.988543	0.834222	0.855342	0.0062949	0.0020784	0.73161	0.998373	SEKER
43928	762.262	262.151	213.843	1.22591	0.578442	44320	236.497	0.79636	0.991155	0.950042	0.90214	0.00596775	0.0024383	0.813857	0.997712	SEKER
43935	765.713	256.313	218.449	1.17333	0.523092	44370	236.516	0.786731	0.990196	0.941648	0.922762	0.00583391	0.00260915	0.85149	0.999078	SEKER
43946	769.228	272.828	205.648	1.32668	0.657146	44592	236.546	0.757768	0.985513	0.933295	0.867014	0.00620825	0.00216398	0.751713	0.997279	SEKER
43947	765.591	266.06	210.666	1.26294	0.61078	44397	236.548	0.749322	0.989864	0.942205	0.88908	0.0060541	0.00233342	0.790463	0.998311	SEKER
43949	764.043	277.995	201.44	1.38004	0.689152	44246	236.554	0.750649	0.993288	0.94607	0.850926	0.00632541	0.00204567	0.724076	0.999253	SEKER
43951	760.195	262.576	213.567	1.22948	0.581768	44326	236.559	0.796387	0.99154	0.955715	0.900918	0.00597428	0.00242776	0.811653	0.997907	SEKER
43964	795.449	266.71	210.169	1.26903	0.615671	44557	236.594	0.778841	0.986691	0.873137	0.887082	0.00606656	0.00231728	0.786915	0.998619	SEKER
43968	763.577	261.84	214.33	1.22166	0.574428	44429	236.605	0.803201	0.989624	0.947635	0.903625	0.00595523	0.00244924	0.816538	0.997535	SEKER
43983	774.627	282.801	198.326	1.42593	0.712872	44363	236.645	0.796188	0.991434	0.921106	0.836791	0.00642977	0.00194466	0.700219	0.998467	SEKER
44019	761.71	277.329	202.344	1.37058	0.683855	44351	236.742	0.769039	0.992514	0.95339	0.853649	0.00630022	0.00206373	0.728717	0.998765	SEKER
44028	768.937	274.515	204.568	1.34192	0.666841	44445	236.766	0.779105	0.990618	0.935745	0.862489	0.00623501	0.00212829	0.743888	0.998239	SEKER
44042	774.452	266.978	210.135	1.2705	0.61684	44538	236.804	0.773481	0.988863	0.922758	0.886978	0.0060619	0.00231441	0.786731	0.999545	SEKER
44048	763.489	271.082	207.222	1.30817	0.644713	44378	236.82	0.761615	0.992564	0.949578	0.873608	0.00615425	0.00221117	0.763192	0.998387	SEKER
44058	778.306	271.34	206.952	1.31112	0.646746	44518	236.847	0.780312	0.989667	0.913974	0.872879	0.0061587	0.00220538	0.761917	0.998966	SEKER
44113	754.12	258.951	217.155	1.19247	0.544756	44436	236.995	0.766703	0.992731	0.974755	0.915211	0.00587017	0.00254048	0.837611	0.998827	SEKER
44141	765.323	271.778	207.141	1.31204	0.647377	44515	237.07	0.797489	0.991598	0.947027	0.872292	0.00615704	0.00219887	0.760893	0.998325	SEKER
44146	770.979	277.524	202.695	1.36917	0.683053	44560	237.083	0.785936	0.990709	0.933289	0.85428	0.0062865	0.00206533	0.729795	0.999214	SEKER
44163	774.123	270.988	207.849	1.30377	0.641643	44646	237.129	0.752402	0.989182	0.92608	0.875053	0.00613609	0.00221926	0.765717	0.998323	SEKER
44165	771.361	263.842	213.423	1.23624	0.587941	44603	237.134	0.749474	0.99018	0.932766	0.898772	0.00597402	0.00240461	0.807791	0.998625	SEKER
44192	769.732	275.946	204.296	1.35072	0.672224	44586	237.207	0.798439	0.991163	0.937291	0.859613	0.00624425	0.00210316	0.738934	0.998091	SEKER
44197	778.339	268.02	210.299	1.27447	0.619949	44681	237.22	0.793697	0.989168	0.91678	0.885085	0.0060642	0.00229559	0.783376	0.998386	SEKER
44212	768.598	268.317	210.296	1.2759	0.621065	44579	237.26	0.752365	0.991767	0.940484	0.884254	0.00606887	0.00228873	0.781904	0.997634	SEKER
44213	847.793	279.624	203.749	1.37239	0.684882	45752	237.263	0.760105	0.966362	0.773001	0.848506	0.00632448	0.0020222	0.719963	0.988072	SEKER
44220	781.713	264.476	213.203	1.24049	0.591733	44842	237.282	0.779757	0.986129	0.909356	0.897176	0.00598092	0.00239033	0.804924	0.998499	SEKER
44258	771.799	276.903	203.842	1.35842	0.676817	44680	237.384	0.766107	0.990555	0.93367	0.857281	0.00625656	0.00208453	0.734931	0.998343	SEKER
44290	764.47	266.333	212.346	1.25424	0.60359	44661	237.47	0.77904	0.991693	0.952346	0.891626	0.00601339	0.00234439	0.794997	0.997117	SEKER
44290	776.883	275.755	204.726	1.34695	0.669936	44739	237.47	0.790441	0.989964	0.922156	0.861161	0.00622613	0.0021122	0.741597	0.998893	SEKER
44305	760.743	271.011	208.262	1.30129	0.639891	44628	237.51	0.788626	0.992762	0.962026	0.876385	0.00611694	0.00222583	0.76805	0.999459	SEKER
44344	772.196	263.99	214.356	1.23155	0.583675	44806	237.614	0.750982	0.989689	0.934522	0.90009	0.00595322	0.00241032	0.810161	0.997751	SEKER
44351	769.972	268.144	210.782	1.27214	0.61813	44773	237.633	0.741904	0.990575	0.940077	0.886214	0.00604595	0.00230038	0.785375	0.999108	SEKER
44353	758.998	256.469	220.324	1.16405	0.511863	44767	237.638	0.774454	0.990752	0.967501	0.926579	0.00578244	0.00262918	0.858549	0.999397	SEKER
44358	758.485	260.431	217.207	1.199	0.55172	44677	237.652	0.779825	0.99286	0.96892	0.912531	0.00587113	0.00251126	0.832713	0.998422	SEKER
44369	780.415	272.24	208.01	1.30878	0.645136	44967	237.681	0.789035	0.986701	0.915458	0.873056	0.00613582	0.00219898	0.762228	0.997592	SEKER
44370	761.446	258.436	218.844	1.18091	0.531906	44732	237.684	0.786437	0.991907	0.961659	0.919702	0.00582456	0.00257058	0.845851	0.998876	SEKER
44385	768.664	255.637	221.486	1.15419	0.499338	44875	237.724	0.783191	0.989081	0.944002	0.929927	0.00575954	0.00265683	0.864765	0.998104	SEKER
44409	758.724	268.854	210.626	1.27645	0.621487	44698	237.788	0.777959	0.993534	0.969423	0.884453	0.00605403	0.0022852	0.782257	0.99851	SEKER
44417	769.784	277.714	203.825	1.36251	0.679216	44833	237.81	0.746554	0.990721	0.941936	0.856313	0.00625242	0.00207376	0.733272	0.999093	SEKER
44417	765.401	275.026	206.054	1.33472	0.662322	44758	237.81	0.757504	0.992381	0.952755	0.864682	0.0061919	0.00213515	0.747675	0.997939	SEKER
44421	788.512	259.806	218.346	1.18988	0.541933	45157	237.82	0.758491	0.983701	0.897804	0.915379	0.00584871	0.00253305	0.837918	0.997021	SEKER
44429	759.18	264.186	214.272	1.23295	0.584957	44767	237.842	0.77198	0.99245	0.968695	0.900282	0.00594625	0.00240956	0.810507	0.999313	SEKER
44429	752.449	248.391	228.103	1.08894	0.395834	44704	237.842	0.779169	0.993848	0.986103	0.95753	0.00559074	0.00289907	0.916864	0.998412	SEKER
44436	772.915	270.332	209.535	1.29015	0.631834	44893	237.861	0.783704	0.98982	0.93472	0.879884	0.00608362	0.00224928	0.774195	0.998828	SEKER
44442	766.629	263.35	215.204	1.22372	0.576386	44827	237.877	0.792645	0.991411	0.950239	0.903273	0.00592569	0.0024333	0.815902	0.998439	SEKER
44459	758.56	257.03	220.511	1.16561	0.513785	44768	237.922	0.766534	0.993098	0.970934	0.925658	0.00578129	0.00261822	0.856842	0.998745	SEKER
44460	774.803	264.338	214.783	1.23072	0.582914	44927	237.925	0.745998	0.989605	0.930672	0.90008	0.00594551	0.00240709	0.810143	0.997058	SEKER
44466	760.049	269.484	210.268	1.28162	0.625451	44807	237.941	0.770534	0.99239	0.967286	0.882951	0.00606044	0.00227212	0.779603	0.999154	SEKER
44478	772.434	259.758	218.718	1.18764	0.539467	44910	237.973	0.786609	0.990381	0.936769	0.916135	0.00584014	0.0025377	0.839303	0.996788	SEKER
44484	769.816	269.317	210.951	1.27668	0.621665	44848	237.989	0.773917	0.991884	0.943278	0.883677	0.00605424	0.00227726	0.780885	0.996938	SEKER
44487	761.329	264.093	214.979	1.22846	0.580824	44806	237.997	0.783263	0.99288	0.964491	0.901188	0.0059364	0.00241526	0.812139	0.997678	SEKER
44495	764.275	263.05	215.727	1.21936	0.57222	44839	238.018	0.77669	0.992328	0.957242	0.904841	0.0059119	0.00244454	0.818738	0.998339	SEKER
44495	793.424	296.399	191.415	1.54846	0.763505	45063	238.018	0.787021	0.987395	0.888199	0.803035	0.00666139	0.00170877	0.644865	0.99855	SEKER
44515	809.186	274.971	206.535	1.33136	0.660173	45305	238.072	0.771972	0.982563	0.854318	0.865806	0.00617705	0.00214113	0.74962	0.998011	SEKER
44515	757.601	265.59	213.967	1.24127	0.59242	44780	238.072	0.771745	0.994082	0.97462	0.896387	0.00596631	0.00237612	0.80351	0.99737	SEKER
44517	757.197	261.816	216.687	1.20827	0.561273	44812	238.077	0.771258	0.993417	0.975704	0.909331	0.00588125	0.0024805	0.826884	0.999097	SEKER
44524	758.387	258.916	219.13	1.18157	0.532651	44860	238.096	0.782977	0.99251	0.972797	0.919587	0.00581521	0.00256517	0.84564	0.999178	SEKER
44538	761.462	265.181	214.272	1.23759	0.589151	44899	238.133	0.785212	0.99196	0.96526	0.898004	0.00595404	0.00238838	0.806411	0.998004	SEKER
44542	789.281	285.525	199.033	1.43456	0.716998	45086	238.144	0.797729	0.987934	0.898496	0.834056	0.00641025	0.00191353	0.695649	0.997953	SEKER
44543	764.877	269.815	210.597	1.28119	0.625125	44928	238.147	0.785591	0.991431	0.956767	0.882631	0.0060574	0.00226768	0.779037	0.998094	SEKER
44554	771.972	257.7	220.58	1.16828	0.517047	45003	238.176	0.774852	0.990023	0.939493	0.924239	0.00578399	0.00260342	0.854218	0.997969	SEKER
44556	772.808	270.478	210.451	1.28523	0.628179	44972	238.182	0.77517	0.99075	0.937503	0.880594	0.00607052	0.0022517	0.775447	0.99663	SEKER
44564	761.869	267.509	212.517	1.25876	0.607356	44905	238.203	0.759234	0.992406	0.964791	0.890447	0.00600281	0.00232792	0.792896	0.998069	SEKER
44565	833.876	272.297	209.519	1.29963	0.638706	45809	238.206	0.699212	0.972844	0.80538	0.874802	0.0061101	0.00220733	0.765279	0.994579	SEKER
44581	813.758	256.84	221.474	1.15968	0.506387	45046	238.248	0.781876	0.989677	0.845998	0.927615	0.00576119	0.00263126	0.86047	0.99787	SEKER
44593	778.735	294.692	193.12	1.52596	0.755345	44946	238.28	0.6962	0.992146	0.924054	0.808575	0.00660848	0.00174246	0.653793	0.997659	SEKER
44598	783.045	263.647	216.457	1.21801	0.570913	45129	238.294	0.791727	0.988234	0.914012	0.903838	0.00591162	0.0024336	0.816923	0.995022	SEKER
44634	774.05	266.897	213.608	1.24947	0.599549	45116	238.39	0.738778	0.989316	0.936133	0.89319	0.00597968	0.00234765	0.797789	0.996815	SEKER
44652	779.929	292.068	195.068	1.49726	0.744264	45012	238.438	0.789756	0.992002	0.922445	0.816379	0.00654098	0.00179222	0.666475	0.997888	SEKER
44665	762.969	256.442	221.898	1.15567	0.501262	45067	238.473	0.756419	0.99108	0.964192	0.92993	0.00574144	0.00264851	0.86477	0.999392	SEKER
44699	767.062	264.365	215.435	1.22712	0.579581	45085	238.563	0.756943	0.991438	0.954656	0.902402	0.00591434	0.00241928	0.81433	0.999282	SEKER
44704	770.546	283.772	200.785	1.41332	0.706657	45040	238.577	0.731138	0.99254	0.946148	0.840734	0.0063478	0.00195631	0.706833	0.998978	SEKER
44706	773.551	266.784	213.621	1.24887	0.599031	45128	238.582	0.780891	0.990649	0.938853	0.894289	0.00596753	0.00235443	0.799753	0.998785	SEKER
44716	766.11	260.597	218.64	1.1919	0.544133	45132	238.609	0.78835	0.990783	0.957394	0.915625	0.00582782	0.00252672	0.838369	0.99925	SEKER
44722	776.694	264.216	216.073	1.22281	0.575517	45158	238.625	0.763852	0.990345	0.931604	0.903143	0.00590797	0.00242462	0.815667	0.997405	SEKER
44724	765.1	266.517	213.952	1.24568	0.596286	45054	238.63	0.808811	0.992675	0.960095	0.895366	0.00595915	0.00236247	0.80168	0.99864	SEKER
44724	772.269	259.274	219.977	1.17864	0.529303	45134	238.63	0.786951	0.990916	0.942352	0.920378	0.0057972	0.00256604	0.847095	0.998424	SEKER
44737	765.217	264.976	215.264	1.23093	0.583113	45101	238.665	0.785135	0.991929	0.96008	0.900704	0.00592297	0.00240463	0.811268	0.998618	SEKER
44749	769.137	266.754	213.845	1.24742	0.597784	45131	238.697	0.781369	0.991536	0.950574	0.894822	0.00596111	0.0023575	0.800706	0.998813	SEKER
44756	827.325	266.578	214.262	1.24417	0.594968	45565	238.716	0.751949	0.982245	0.821692	0.895481	0.00595625	0.00236254	0.801886	0.997682	SEKER
44782	765.251	272.731	209.399	1.30245	0.640709	45136	238.785	0.749189	0.992157	0.960961	0.875531	0.0060902	0.00220749	0.766555	0.998399	SEKER
44808	771.941	262.194	217.945	1.20303	0.55592	45203	238.854	0.775332	0.991262	0.944925	0.910982	0.00585151	0.00248591	0.829887	0.998378	SEKER
44826	783.558	265.823	214.956	1.23664	0.5883	45376	238.902	0.752493	0.987879	0.917482	0.898725	0.00593011	0.00238644	0.807708	0.998844	SEKER
44829	766.523	270.259	211.481	1.27793	0.622634	45200	238.91	0.78319	0.991792	0.958779	0.884004	0.00602867	0.00227101	0.781463	0.998658	SEKER
44830	827.094	272.407	209.936	1.29757	0.637232	45467	238.913	0.786836	0.98599	0.82351	0.877044	0.00607644	0.00221776	0.769206	0.998097	SEKER
44868	898.66	271.608	210.956	1.28751	0.629881	45687	239.014	0.737803	0.982074	0.698161	0.879997	0.00605349	0.00223929	0.774395	0.997043	SEKER
44901	760.063	256.067	223.63	1.14504	0.48713	45226	239.102	0.799007	0.992814	0.976712	0.933749	0.00570291	0.00267422	0.871887	0.998349	SEKER
44903	772.654	277.139	206.687	1.34086	0.666181	45351	239.107	0.736308	0.990121	0.945181	0.862771	0.00617194	0.00210952	0.744374	0.998101	SEKER
44906	767.466	263.548	217.384	1.21236	0.56537	45287	239.115	0.776652	0.991587	0.958067	0.907292	0.00586889	0.00245315	0.823179	0.99799	SEKER
44911	770.999	261.836	218.81	1.19664	0.549222	45359	239.129	0.766857	0.990123	0.949413	0.913277	0.0058301	0.00250188	0.834075	0.998084	SEKER
44928	766.3	269.942	212.192	1.27216	0.618142	45295	239.174	0.794511	0.991898	0.961456	0.88602	0.00600832	0.00228406	0.785032	0.998684	SEKER
44937	775.198	275.444	208.532	1.32087	0.653327	45290	239.198	0.774175	0.992206	0.939699	0.868408	0.00612956	0.00215033	0.754133	0.996113	SEKER
44945	772.411	272.589	211.348	1.28976	0.631548	45285	239.219	0.786852	0.992492	0.946661	0.877583	0.00606494	0.002219	0.770151	0.993312	SEKER
44957	777.754	277.8	206.307	1.34654	0.669685	45371	239.251	0.769193	0.990875	0.933948	0.861234	0.00617924	0.00209701	0.741725	0.99876	SEKER
44987	765.398	263.812	217.366	1.21368	0.566673	45335	239.331	0.787174	0.992324	0.964989	0.907204	0.00586417	0.00245022	0.823018	0.998878	SEKER
45003	769.437	270.823	211.864	1.27829	0.622904	45353	239.373	0.757626	0.992283	0.955224	0.883875	0.00601788	0.00226561	0.781234	0.99864	SEKER
45009	768.751	277.918	206.485	1.34595	0.669323	45398	239.389	0.743643	0.991431	0.957057	0.861366	0.00617473	0.00209676	0.741951	0.998626	SEKER
45010	797.835	289.797	198.083	1.46301	0.729928	45724	239.392	0.709053	0.984385	0.888572	0.826068	0.0064385	0.00184938	0.682388	0.998337	SEKER
45014	772.981	270.367	212.246	1.27383	0.619456	45454	239.403	0.774608	0.99032	0.946716	0.885474	0.00600628	0.00227766	0.784064	0.998768	SEKER
45037	782.176	255.577	224.643	1.13771	0.476891	45554	239.464	0.791164	0.988651	0.925061	0.936952	0.00567483	0.00269775	0.877879	0.998767	SEKER
45066	768.715	268.417	214.185	1.2532	0.602717	45424	239.541	0.776037	0.992119	0.958359	0.892421	0.00595609	0.00233034	0.796415	0.998069	SEKER
45073	782.275	270.107	212.858	1.26895	0.615606	45552	239.559	0.793315	0.989485	0.925566	0.886907	0.00599265	0.00228724	0.786605	0.998161	SEKER
45084	763.811	261.138	219.978	1.18711	0.538882	45425	239.589	0.773098	0.992493	0.971092	0.917478	0.00579226	0.00253169	0.841767	0.999271	SEKER
45085	773.652	264.852	216.937	1.22087	0.573668	45537	239.591	0.783596	0.990074	0.946565	0.904623	0.0058745	0.00242673	0.818344	0.999091	SEKER
45116	766.705	259.021	222.081	1.16634	0.514675	45484	239.674	0.774191	0.991909	0.964459	0.925307	0.00574122	0.00259613	0.856193	0.998609	SEKER
45125	894.185	273.898	211.27	1.29644	0.636417	46673	239.698	0.675504	0.966833	0.709206	0.875134	0.00606977	0.00219609	0.765859	0.992887	SEKER
45137	774.785	272.942	210.778	1.29493	0.635327	45520	239.729	0.769101	0.991586	0.944888	0.878316	0.00604697	0.00221983	0.771438	0.998958	SEKER
45142	787.312	266.841	216.149	1.23453	0.586392	45731	239.743	0.790356	0.98712	0.91516	0.898447	0.00591115	0.00237586	0.807207	0.996518	SEKER
45154	773.686	273.645	210.451	1.30028	0.639171	45500	239.775	0.757643	0.992396	0.947931	0.876226	0.00606026	0.00220361	0.767771	0.998318	SEKER
45169	766.629	265.716	217.263	1.22301	0.575712	45532	239.814	0.809393	0.992028	0.965784	0.902521	0.00588271	0.00240762	0.814545	0.996199	SEKER
45174	768.607	275.316	209.474	1.31432	0.648927	45529	239.828	0.79357	0.992203	0.960926	0.871101	0.00609456	0.00216469	0.758817	0.997327	SEKER
45195	765.944	270.532	213.183	1.26901	0.615656	45511	239.883	0.785099	0.993057	0.968069	0.88671	0.00598588	0.00228263	0.786255	0.997767	SEKER
45217	773.044	278.309	207.198	1.3432	0.667633	45541	239.942	0.734734	0.992886	0.950831	0.862142	0.00615496	0.00209759	0.743288	0.998386	SEKER
45218	788.51	269.423	213.95	1.25928	0.607782	45684	239.944	0.784055	0.989799	0.913917	0.890586	0.00595831	0.0023121	0.793144	0.998791	SEKER
45244	774.166	278.5	207.11	1.3447	0.668555	45600	240.013	0.75369	0.992193	0.948643	0.861808	0.00615551	0.00209452	0.742713	0.998722	SEKER
45252	786.514	269.906	215.013	1.2553	0.604474	45733	240.035	0.714024	0.989482	0.919252	0.889328	0.0059645	0.00230145	0.790904	0.99282	SEKER
45278	771.915	275.882	209.201	1.31874	0.651907	45666	240.104	0.793557	0.991504	0.954901	0.870312	0.00609307	0.00215633	0.757443	0.998871	SEKER
45328	795.88	295.002	195.936	1.50561	0.747569	45823	240.236	0.778671	0.989198	0.899252	0.814353	0.00650817	0.00176559	0.663171	0.998475	SEKER
45339	765.979	262.83	219.838	1.19557	0.548082	45690	240.265	0.759142	0.992318	0.971064	0.914146	0.005797	0.00249716	0.835663	0.99909	SEKER
45347	834.011	264.891	220.233	1.20278	0.555661	46554	240.286	0.793946	0.974073	0.819247	0.907114	0.00584143	0.00243976	0.822856	0.989713	SEKER
45357	776.822	273.04	211.918	1.28842	0.630556	45741	240.313	0.755686	0.991605	0.94452	0.88014	0.00601979	0.00222827	0.774646	0.99807	SEKER
45363	779.489	287.104	201.87	1.42222	0.711066	45774	240.329	0.818236	0.991021	0.938192	0.83708	0.00632903	0.00191684	0.700703	0.996555	SEKER
45375	786.539	267.82	216.172	1.23892	0.590344	46073	240.361	0.729373	0.98485	0.921692	0.89747	0.00590238	0.00236203	0.805452	0.997894	SEKER
45381	767.7	267.198	216.395	1.23477	0.58661	45728	240.377	0.770318	0.992412	0.967611	0.899621	0.00588787	0.0023789	0.809318	0.999318	SEKER
45422	779.468	265.769	217.928	1.21953	0.572376	45912	240.485	0.772089	0.989327	0.939463	0.904866	0.0058511	0.00241966	0.818782	0.998526	SEKER
45428	769.104	265.474	218.153	1.21692	0.569848	45811	240.501	0.785137	0.99164	0.96508	0.90593	0.00584384	0.00242804	0.820709	0.998733	SEKER
45443	778.406	268.436	215.895	1.24336	0.594263	45872	240.541	0.780727	0.990648	0.942463	0.896083	0.00590708	0.00234934	0.802965	0.998377	SEKER
45454	813.599	263.435	220.467	1.19489	0.547364	46295	240.57	0.746028	0.981834	0.862901	0.913204	0.00579564	0.00248629	0.833941	0.99647	SEKER
45454	777.58	278.065	208.335	1.3347	0.662309	45868	240.57	0.789955	0.990974	0.944695	0.865156	0.00611751	0.00211413	0.748495	0.999017	SEKER
45460	783.344	267.212	217.585	1.22808	0.580473	45965	240.586	0.770339	0.989013	0.930967	0.900355	0.00587796	0.00238266	0.810639	0.995529	SEKER
45475	773.603	270.42	214.459	1.26094	0.609146	45854	240.625	0.771704	0.991735	0.954874	0.889821	0.00594657	0.00229962	0.791781	0.998389	SEKER
45477	772.981	270.523	214.27	1.26253	0.610446	45827	240.631	0.794497	0.992363	0.956454	0.889501	0.00594857	0.00229709	0.791213	0.998933	SEKER
45479	772.273	266.092	218.01	1.22055	0.57336	45886	240.636	0.752528	0.99113	0.958251	0.904332	0.00585089	0.00241387	0.817817	0.998186	SEKER
45510	778.457	285.024	203.534	1.40038	0.70005	45877	240.718	0.782402	0.992	0.943729	0.844552	0.0062629	0.00196544	0.713268	0.998844	SEKER
45512	784.574	265.376	218.624	1.21385	0.566843	46089	240.723	0.796835	0.987481	0.929112	0.907102	0.0058309	0.00243523	0.822835	0.998797	SEKER
45514	770.882	261.782	221.68	1.1809	0.531893	45919	240.729	0.762506	0.99118	0.962452	0.919578	0.00575167	0.00253704	0.845623	0.998596	SEKER
45530	769.815	267.058	217.386	1.2285	0.580864	45833	240.771	0.775745	0.993389	0.965461	0.901567	0.00586554	0.00239045	0.812823	0.998554	SEKER
45545	785.8	274.036	212.198	1.29142	0.632765	46060	240.81	0.762259	0.988819	0.926886	0.878754	0.00601682	0.00221318	0.772209	0.997243	SEKER
45598	774.842	260.727	223.148	1.1684	0.517192	45973	240.951	0.790479	0.991843	0.954398	0.924149	0.00571795	0.00257269	0.854051	0.997875	SEKER
45601	786.993	285.391	204.137	1.39804	0.698829	46050	240.958	0.751847	0.99025	0.925215	0.844309	0.00625845	0.00196179	0.712857	0.996601	SEKER
45604	774.694	275.577	211.152	1.30511	0.64258	46000	240.966	0.779183	0.991391	0.954888	0.874408	0.00604282	0.00217909	0.764589	0.997873	SEKER
45606	791.464	283.614	205.379	1.38093	0.689642	46088	240.972	0.789441	0.989542	0.914891	0.849648	0.00621878	0.00199913	0.721901	0.996894	SEKER
45623	770.991	270.484	215.05	1.25777	0.606537	46014	241.017	0.750218	0.991503	0.964484	0.891057	0.00592868	0.00230547	0.793982	0.99865	SEKER
45626	790.051	265.726	218.948	1.21365	0.566644	46200	241.025	0.772641	0.987576	0.918569	0.907042	0.005824	0.00243171	0.822726	0.998499	SEKER
45628	777.737	265.04	219.314	1.2085	0.561503	46097	241.03	0.776977	0.989826	0.947929	0.909411	0.0058087	0.00245075	0.827028	0.99946	SEKER
45646	771.593	274.636	211.902	1.29605	0.636136	45953	241.077	0.779274	0.993319	0.963465	0.877808	0.00601664	0.0022036	0.770547	0.998666	SEKER
45650	772.065	261.459	222.559	1.17479	0.524812	46028	241.088	0.754957	0.991788	0.962372	0.922086	0.00572747	0.00255405	0.850243	0.998855	SEKER
45653	777.821	266.988	218.421	1.22236	0.575086	46020	241.096	0.748496	0.992025	0.948243	0.903023	0.00584819	0.00239881	0.81545	0.99677	SEKER
45654	779.187	268.036	217.255	1.23374	0.585675	46140	241.098	0.748426	0.989467	0.944942	0.899501	0.00587103	0.00237083	0.809102	0.998218	SEKER
45656	771.851	271.828	213.935	1.27061	0.616924	45988	241.104	0.755244	0.992781	0.963032	0.886971	0.00595383	0.00227308	0.786717	0.999612	SEKER
45670	788.865	294.647	197.814	1.48952	0.741133	46048	241.141	0.704469	0.991791	0.922222	0.818405	0.00645166	0.00178535	0.669787	0.99766	SEKER
45678	773.561	269.258	216.17	1.24558	0.596199	46084	241.162	0.775373	0.99119	0.959241	0.895653	0.0058947	0.00233991	0.802193	0.999199	SEKER
45692	773.948	267.338	218.123	1.22563	0.578183	46025	241.199	0.796333	0.992765	0.958576	0.902224	0.00585087	0.00239143	0.814008	0.997673	SEKER
45719	774.718	261.854	222.728	1.17567	0.525843	46106	241.27	0.774216	0.991606	0.957237	0.92139	0.00572747	0.00254635	0.84896	0.998094	SEKER
45725	778.722	276.233	210.989	1.30923	0.645443	46072	241.286	0.744913	0.992468	0.947542	0.873488	0.00604118	0.00216934	0.762981	0.998916	SEKER
45726	811.461	269.914	216.766	1.24518	0.595852	46322	241.289	0.780907	0.987134	0.872645	0.893946	0.00590286	0.00232534	0.79914	0.995075	SEKER
45735	776.332	267.13	218.33	1.22352	0.576189	46119	241.312	0.753385	0.991674	0.953594	0.903351	0.00584083	0.00239927	0.816042	0.998441	SEKER
45738	786.456	290.063	201.212	1.44158	0.72028	46160	241.32	0.745599	0.990858	0.929262	0.831957	0.00634184	0.00187413	0.692152	0.997793	SEKER
45739	777.912	281.457	207.09	1.3591	0.677222	46085	241.323	0.780782	0.992492	0.949807	0.857406	0.00615354	0.0020514	0.735145	0.999138	SEKER
45753	906.221	275.321	212.132	1.29788	0.637453	46399	241.36	0.779119	0.986077	0.700102	0.876648	0.00601755	0.0021923	0.768512	0.997434	SEKER
45754	771.006	262.541	222.152	1.18181	0.532932	46104	241.362	0.786286	0.992408	0.967216	0.919331	0.00573811	0.00252834	0.845169	0.998831	SEKER
45794	777.051	279.918	208.581	1.34201	0.666898	46143	241.468	0.777342	0.992437	0.953058	0.862637	0.00611256	0.00208792	0.744142	0.998649	SEKER
45813	786.056	272.783	214.142	1.27384	0.619459	46250	241.518	0.754123	0.990551	0.931733	0.885386	0.00595426	0.00225704	0.783909	0.998573	SEKER
45862	778.266	274.233	213.121	1.28674	0.629309	46192	241.647	0.783096	0.992856	0.951495	0.881175	0.00597952	0.0022238	0.77647	0.999118	SEKER
45886	784.353	272.107	215.298	1.26386	0.611525	46375	241.71	0.761075	0.989456	0.937275	0.888292	0.00593006	0.00227752	0.789063	0.997268	SEKER
45906	780.126	272.71	214.819	1.26949	0.616034	46319	241.763	0.788722	0.991084	0.947872	0.886522	0.00594061	0.00226344	0.785921	0.997716	SEKER
45919	776.844	254.553	229.804	1.1077	0.430113	46375	241.797	0.779543	0.990167	0.956169	0.94989	0.00554352	0.00278393	0.902292	0.999464	SEKER
45932	777.532	273.715	214.298	1.27726	0.622117	46306	241.831	0.776088	0.991923	0.954748	0.883515	0.00595914	0.00223985	0.780599	0.99703	SEKER
45951	784.074	269.299	217.603	1.23757	0.589134	46376	241.881	0.748107	0.990836	0.939271	0.898188	0.00586058	0.00235282	0.806742	0.998399	SEKER
45956	779.419	282.842	207.051	1.36605	0.681264	46324	241.895	0.744203	0.992056	0.950627	0.855228	0.00615463	0.002031	0.731414	0.999148	SEKER
45982	803.092	261.315	224.223	1.16542	0.513553	46659	241.963	0.772703	0.98549	0.895916	0.925945	0.00568298	0.00257689	0.857374	0.999204	SEKER
45984	790.582	293.522	199.762	1.46935	0.732682	46363	241.968	0.750269	0.991825	0.924534	0.824362	0.00638313	0.00181838	0.679573	0.998533	SEKER
45988	774.279	268.141	218.606	1.22659	0.579088	46335	241.979	0.799819	0.992511	0.963961	0.902431	0.00583067	0.00238536	0.814382	0.998916	SEKER
45989	769.145	267.979	218.841	1.22453	0.577152	46275	241.981	0.794832	0.99382	0.976894	0.902988	0.00582701	0.00238976	0.815387	0.99847	SEKER
45993	773.877	270.548	216.662	1.24871	0.598893	46334	241.992	0.768471	0.99264	0.965068	0.894452	0.00588236	0.00232253	0.800045	0.999022	SEKER
45993	775.581	260.737	224.975	1.15896	0.505472	46415	241.992	0.773577	0.990908	0.960832	0.928107	0.00566906	0.00259468	0.861383	0.998308	SEKER
46009	798.716	287.506	203.927	1.40984	0.704908	46553	242.034	0.786425	0.988314	0.906291	0.841841	0.0062489	0.00193599	0.708696	0.99915	SEKER
46015	775.166	277.215	211.536	1.31049	0.646309	46401	242.05	0.785373	0.991681	0.962321	0.87315	0.00602444	0.00215999	0.76239	0.999102	SEKER
46021	782.884	281.71	208.41	1.35171	0.672822	46432	242.066	0.740483	0.991148	0.943563	0.859271	0.00612134	0.00205848	0.738347	0.99803	SEKER
46028	779.483	262.799	223.43	1.17621	0.526475	46414	242.084	0.771453	0.991684	0.95196	0.921174	0.00570955	0.002536	0.848562	0.998085	SEKER
46090	779.136	276.965	212.848	1.30124	0.639849	46412	242.247	0.766124	0.993062	0.954092	0.874647	0.00600923	0.00216935	0.765008	0.995456	SEKER
46092	774.513	268.313	219.006	1.22514	0.577718	46436	242.252	0.788261	0.992592	0.965557	0.902873	0.00582124	0.00238617	0.81518	0.998706	SEKER
46119	774.893	258.113	227.883	1.13266	0.4696	46508	242.323	0.790928	0.991636	0.965175	0.938825	0.00559668	0.00268194	0.881393	0.998317	SEKER
46132	785.214	263.075	223.873	1.17511	0.525192	46785	242.357	0.768099	0.986043	0.940234	0.921247	0.00570266	0.00253374	0.848697	0.997313	SEKER
46137	784.568	272.407	215.962	1.26137	0.609492	46611	242.37	0.770182	0.989831	0.941885	0.889736	0.00590431	0.00228241	0.79163	0.998534	SEKER
46151	786.415	274.758	214.411	1.28145	0.625324	46749	242.407	0.730469	0.987208	0.937751	0.882259	0.00595345	0.00222501	0.778381	0.997456	SEKER
46173	792.175	286.659	205.409	1.39555	0.697524	46608	242.465	0.78266	0.990667	0.924604	0.845832	0.00620836	0.00196016	0.715431	0.998423	SEKER
46202	780.633	260.1	226.398	1.14886	0.492297	46732	242.541	0.77687	0.988659	0.952745	0.932493	0.00562962	0.00262568	0.869543	0.998984	SEKER
46217	779.227	270.78	217.728	1.24366	0.594525	46553	242.581	0.754563	0.992782	0.956497	0.895859	0.00585888	0.00232784	0.802563	0.998118	SEKER
46250	782.848	281.719	209.376	1.34552	0.66906	46601	242.667	0.795083	0.992468	0.948346	0.86138	0.00609122	0.00206853	0.741975	0.99834	SEKER
46294	782.096	270.635	218.819	1.2368	0.588442	46720	242.783	0.755894	0.990882	0.951074	0.897085	0.005846	0.00233547	0.804762	0.995328	SEKER
46323	782.327	262.006	225.603	1.16136	0.508502	46742	242.859	0.774917	0.991036	0.951108	0.92692	0.00565607	0.00257551	0.85918	0.997816	SEKER
46343	784.808	280.39	210.823	1.32998	0.65929	46736	242.911	0.776733	0.991591	0.945512	0.866331	0.00605033	0.0021023	0.750529	0.998192	SEKER
46347	779.401	261.436	225.853	1.15755	0.503672	46748	242.921	0.76769	0.991422	0.958759	0.929181	0.00564084	0.00259373	0.863378	0.999401	SEKER
46371	810.787	281.378	210.339	1.33774	0.664227	46994	242.984	0.738627	0.986743	0.886427	0.863551	0.00606798	0.0020815	0.74572	0.997578	SEKER
46374	793.148	294.128	201.04	1.46303	0.729937	46747	242.992	0.712679	0.992021	0.926352	0.826145	0.00634251	0.0018225	0.682516	0.99854	SEKER
46379	795.796	276.51	213.915	1.29261	0.633642	46847	243.005	0.789766	0.99001	0.920296	0.87883	0.00596197	0.00219376	0.772342	0.99834	SEKER
46380	809.834	308.662	191.746	1.60974	0.783637	46786	243.008	0.772228	0.991322	0.888687	0.787295	0.00665506	0.00157719	0.619834	0.997771	SEKER
46382	776.201	268.469	220.31	1.2186	0.57148	46718	243.013	0.773807	0.992808	0.967411	0.905181	0.00578822	0.00239699	0.819353	0.998461	SEKER
46390	779.816	274.56	215.729	1.27271	0.618577	46750	243.034	0.775234	0.992299	0.958628	0.885175	0.00591853	0.00224136	0.783536	0.997214	SEKER
46411	783.759	286.888	206.331	1.39043	0.6948	46760	243.089	0.791591	0.992536	0.949436	0.847332	0.00618146	0.00196555	0.717971	0.998286	SEKER
46414	786.458	286.147	207.167	1.38124	0.689815	46778	243.097	0.732856	0.992219	0.942992	0.849552	0.00616511	0.00198098	0.721739	0.996896	SEKER
46418	780.558	271.729	217.911	1.24697	0.597399	46840	243.107	0.767354	0.990991	0.957383	0.89467	0.00585395	0.00231356	0.800435	0.998118	SEKER
46427	811.657	293.918	202.246	1.45327	0.725612	46974	243.131	0.683796	0.988355	0.885596	0.827207	0.00633076	0.00182849	0.684271	0.99443	SEKER
46448	777.498	278.588	212.483	1.31111	0.646737	46761	243.186	0.787681	0.993306	0.965558	0.872925	0.00599784	0.00214823	0.761997	0.999061	SEKER
46460	831.866	275.3	215.481	1.27761	0.622382	47213	243.217	0.760343	0.984051	0.843689	0.883462	0.00592554	0.00222668	0.780505	0.997177	SEKER
46474	783.172	278.498	212.654	1.30963	0.645719	46851	243.254	0.782918	0.991953	0.952151	0.873451	0.00599255	0.00215152	0.762916	0.999137	SEKER
46480	793.169	269.227	220.069	1.22338	0.576056	47029	243.27	0.75592	0.988326	0.92842	0.903585	0.00579232	0.00238182	0.816467	0.998846	SEKER
46494	799.436	254.092	233.2	1.08959	0.397094	47084	243.306	0.769106	0.987469	0.914196	0.957551	0.00546506	0.00283414	0.916904	0.999047	SEKER
46503	780.526	268.383	221.335	1.21257	0.565576	46896	243.33	0.757255	0.99162	0.959215	0.906651	0.00577131	0.00240555	0.822015	0.99675	SEKER
46568	783.891	275.355	216.021	1.27466	0.620103	46944	243.5	0.769974	0.99199	0.952327	0.884313	0.00591296	0.00223054	0.78201	0.9968	SEKER
46594	804.546	268.33	221.417	1.21187	0.564888	47173	243.568	0.785495	0.987726	0.904562	0.907718	0.00575889	0.0024117	0.823952	0.998527	SEKER
46610	785.646	276.21	215.122	1.28397	0.62723	47018	243.61	0.746859	0.991322	0.948932	0.881973	0.00592598	0.00221187	0.777876	0.998769	SEKER
46625	785.298	281.116	211.673	1.32806	0.658049	46992	243.649	0.735874	0.99219	0.950079	0.866721	0.00602929	0.00209876	0.751205	0.997649	SEKER
46625	785.745	275.831	215.836	1.27796	0.622657	47081	243.649	0.748347	0.990315	0.948998	0.883327	0.00591594	0.00222173	0.780267	0.997153	SEKER
46680	796.926	286.45	207.876	1.37799	0.688014	47243	243.793	0.726424	0.988083	0.923644	0.851083	0.00613646	0.00198602	0.724342	0.998132	SEKER
46699	783.519	275.667	216.002	1.27623	0.621315	47066	243.842	0.785676	0.992202	0.955913	0.884552	0.00590307	0.00222921	0.782433	0.998561	SEKER
46701	781.494	274.348	217.154	1.26338	0.611133	47058	243.847	0.753339	0.992414	0.960915	0.888825	0.00587456	0.00226163	0.79001	0.998082	SEKER
46716	785.04	267.506	222.618	1.20164	0.554477	47132	243.887	0.786995	0.991174	0.952559	0.911705	0.00572622	0.00244042	0.831206	0.998807	SEKER
46828	779.434	268.165	222.591	1.20475	0.557688	47157	244.179	0.797208	0.993023	0.968627	0.910553	0.0057266	0.00242827	0.829106	0.998863	SEKER
46841	833.57	295.677	202.568	1.45964	0.72845	47465	244.213	0.703572	0.986853	0.847134	0.825945	0.00631235	0.00181207	0.682185	0.995746	SEKER
46887	789.514	276.585	216.186	1.27939	0.62375	47344	244.333	0.762452	0.990347	0.945241	0.883389	0.00589898	0.00221597	0.780376	0.998403	SEKER
46918	790.933	281.766	212.61	1.32527	0.65623	47341	244.413	0.718059	0.991065	0.942475	0.867432	0.00600551	0.00209735	0.752439	0.997188	SEKER
46925	776.375	256.512	233.169	1.10011	0.416802	47253	244.432	0.776454	0.993059	0.978298	0.952905	0.00546642	0.00278024	0.908028	0.998934	SEKER
46946	796.12	285.489	209.856	1.36041	0.677986	47380	244.486	0.767593	0.99084	0.930789	0.856378	0.00608121	0.00201758	0.733383	0.997699	SEKER
46954	799.219	296.875	201.686	1.47196	0.733801	47395	244.507	0.72489	0.990695	0.923742	0.823602	0.00632268	0.00179453	0.67832	0.998463	SEKER
46973	781.213	275.061	217.732	1.2633	0.611069	47306	244.556	0.751833	0.992961	0.967207	0.8891	0.00585572	0.00225716	0.790499	0.998637	SEKER
46975	790.564	284.706	210.229	1.35426	0.674352	47450	244.562	0.778402	0.989989	0.944501	0.858999	0.00606079	0.00203554	0.737879	0.999281	SEKER
47044	792.003	279.62	214.512	1.30352	0.641461	47419	244.741	0.77983	0.992092	0.942455	0.875263	0.0059438	0.00215179	0.766086	0.998605	SEKER
47049	797.773	263.874	227.261	1.16111	0.508187	47536	244.754	0.795284	0.989755	0.92897	0.927542	0.00560849	0.00256071	0.860334	0.998941	SEKER
47096	807.722	255.179	235.342	1.08429	0.386564	47740	244.876	0.795272	0.98651	0.907131	0.959628	0.00541826	0.00283434	0.920886	0.998508	SEKER
47107	792.499	284.4	211.207	1.34655	0.66969	47479	244.905	0.795458	0.992165	0.942536	0.86113	0.00603731	0.00204785	0.741545	0.998525	SEKER
47171	792.111	277.027	217.081	1.27615	0.621255	47597	245.071	0.762298	0.99105	0.944741	0.884646	0.00587283	0.00221874	0.782599	0.998712	SEKER
47210	791.788	277.143	217.195	1.27601	0.621149	47669	245.173	0.749782	0.990371	0.946294	0.884643	0.00587043	0.0022178	0.782594	0.998598	SEKER
47211	853.59	275.61	218.712	1.26015	0.608499	47904	245.175	0.791135	0.985534	0.814244	0.889572	0.00583784	0.00225505	0.791338	0.997207	SEKER
47239	820.129	283.127	212.965	1.32946	0.65895	48050	245.248	0.764682	0.983122	0.882564	0.866211	0.00599351	0.0020814	0.750321	0.997519	SEKER
47273	784.934	270.095	223.408	1.20898	0.56199	47632	245.336	0.779362	0.992463	0.964177	0.908332	0.00571352	0.00239918	0.825068	0.99749	SEKER
47300	809.261	281.014	214.558	1.30973	0.645791	47819	245.406	0.77461	0.989147	0.907599	0.873288	0.0059411	0.00213146	0.762633	0.998846	SEKER
47369	800.778	272.143	222.153	1.22503	0.577616	47880	245.585	0.746345	0.989327	0.928282	0.902413	0.00574517	0.00235019	0.814349	0.997599	SEKER
47397	795.724	276.469	218.655	1.2644	0.611963	47788	245.658	0.778506	0.991818	0.940667	0.888555	0.00583305	0.00224291	0.78953	0.998285	SEKER
47406	803.384	281.505	215.045	1.30905	0.64532	48073	245.681	0.804364	0.986125	0.92299	0.872742	0.00593817	0.00212508	0.761678	0.997076	SEKER
47407	808.47	291.718	207.11	1.40852	0.704235	47884	245.684	0.732064	0.990038	0.911433	0.842197	0.00615347	0.00190965	0.709295	0.999054	SEKER
47447	785.622	267.906	225.671	1.18715	0.538927	47852	245.787	0.765966	0.991536	0.966032	0.917438	0.00564643	0.00246752	0.841693	0.999217	SEKER
47465	801.514	281.113	215.127	1.30673	0.643711	47925	245.834	0.778166	0.990402	0.928456	0.874501	0.00592254	0.00213663	0.764753	0.999325	SEKER
47484	794.213	282.413	214.382	1.31734	0.650964	47848	245.883	0.74445	0.992393	0.945983	0.870651	0.00594754	0.00210811	0.758033	0.998583	SEKER
47496	793.007	276.265	219.265	1.25996	0.608337	47965	245.914	0.748676	0.990222	0.949102	0.89014	0.00581659	0.00225259	0.792349	0.998325	SEKER
47518	785.966	276.585	218.976	1.26308	0.610893	47854	245.971	0.795706	0.992979	0.966631	0.889314	0.00582064	0.0022458	0.790879	0.998946	SEKER
47532	811.908	277.242	218.42	1.26931	0.615892	48007	246.007	0.786381	0.990106	0.906113	0.887337	0.00583275	0.00223053	0.787367	0.999412	SEKER
47533	800.405	279.592	216.685	1.29031	0.631955	48024	246.01	0.777941	0.989776	0.932364	0.87989	0.00588206	0.00217481	0.774206	0.998969	SEKER
47534	786.076	278.361	217.784	1.27815	0.622803	47834	246.013	0.772157	0.993728	0.966685	0.883788	0.00585605	0.00220383	0.781081	0.998342	SEKER
47562	802.028	290.04	209.409	1.38504	0.691891	47944	246.085	0.733981	0.992032	0.929161	0.848452	0.00609814	0.00194934	0.719871	0.997049	SEKER
47705	803.672	283.617	214.376	1.32298	0.654726	48140	246.455	0.778539	0.990964	0.928146	0.868971	0.00594522	0.00209107	0.75511	0.998999	SEKER
47720	799.753	293.752	207.022	1.41894	0.709456	48085	246.493	0.779267	0.992409	0.937559	0.83912	0.00615575	0.00188259	0.704122	0.999108	SEKER
47735	795.626	273.796	222.466	1.23073	0.582927	48141	246.532	0.752325	0.991566	0.947608	0.900422	0.00573575	0.00232571	0.810761	0.997829	SEKER
47762	816.963	293.871	207.37	1.41713	0.708561	48372	246.602	0.717805	0.987389	0.899265	0.839149	0.00615283	0.00188196	0.704171	0.997905	SEKER
47779	819.346	298.594	203.963	1.46397	0.730347	48331	246.646	0.723924	0.988579	0.89436	0.826022	0.00624949	0.0017947	0.682313	0.998883	SEKER
47812	802.135	282.246	216.049	1.3064	0.643482	48280	246.731	0.74613	0.990307	0.933796	0.874168	0.00590326	0.00212643	0.76417	0.998313	SEKER
47829	800.678	292.009	208.749	1.39885	0.699254	48359	246.775	0.797376	0.98904	0.93753	0.845093	0.00610527	0.00192089	0.714182	0.999033	SEKER
47930	790.823	272.467	224.513	1.21359	0.566589	48282	247.035	0.760287	0.992709	0.963072	0.906661	0.00568469	0.00236955	0.822034	0.997613	SEKER
47971	905.348	281.9	217.35	1.29699	0.636816	48879	247.141	0.741667	0.981424	0.735457	0.876696	0.00587647	0.00214137	0.768596	0.996861	SEKER
48004	795.841	281.086	217.804	1.29055	0.632128	48377	247.226	0.775208	0.99229	0.952434	0.879537	0.00585548	0.00216151	0.773585	0.998349	SEKER
48007	809.638	284.681	214.895	1.32475	0.655884	48696	247.234	0.741535	0.985851	0.920307	0.868458	0.00592999	0.00208079	0.754219	0.999149	SEKER
48067	791.313	271.549	225.786	1.20269	0.555568	48402	247.388	0.733993	0.993079	0.964629	0.911024	0.00564939	0.00240049	0.829964	0.998187	SEKER
48094	820.094	296.84	206.417	1.43806	0.718642	48614	247.457	0.795271	0.989303	0.898615	0.833638	0.00617209	0.00183875	0.694952	0.999384	SEKER
48112	788.422	278.376	220.373	1.2632	0.61099	48427	247.504	0.801439	0.993495	0.972626	0.889098	0.00578601	0.00223027	0.790495	0.998555	SEKER
48123	798.934	276.419	221.929	1.24553	0.596151	48499	247.532	0.75696	0.992247	0.947416	0.895496	0.00574401	0.0022785	0.801914	0.998806	SEKER
48201	792.906	277.467	221.411	1.25318	0.602694	48558	247.733	0.788216	0.992648	0.963435	0.892838	0.00575645	0.00225644	0.797159	0.998981	SEKER
48202	815.613	272.311	225.942	1.20523	0.558181	48782	247.735	0.756537	0.98811	0.910556	0.909749	0.00564938	0.00238708	0.827644	0.997499	SEKER
48224	796.462	275.828	222.861	1.23767	0.58922	48642	247.792	0.779378	0.991407	0.955307	0.898356	0.00571973	0.00229799	0.807043	0.998849	SEKER
48237	813.952	314.6	195.371	1.61027	0.7838	48597	247.825	0.779172	0.992592	0.91494	0.787747	0.00652196	0.00154919	0.620545	0.999246	SEKER
48324	812.215	285.38	216.014	1.32111	0.653488	48849	248.048	0.776701	0.989253	0.920515	0.869187	0.00590555	0.00207919	0.755487	0.998085	SEKER
48327	803.021	290.207	212.291	1.36702	0.681823	48756	248.056	0.771504	0.991201	0.941772	0.854755	0.00600507	0.00197727	0.730606	0.998756	SEKER
48335	812.408	293.954	209.525	1.40295	0.701386	48862	248.077	0.734731	0.989215	0.920287	0.843932	0.00608159	0.00190294	0.712221	0.999212	SEKER
48357	820.651	296.704	207.818	1.42771	0.71373	48825	248.133	0.740094	0.990415	0.902303	0.836298	0.00613571	0.00185135	0.699394	0.998533	SEKER
48412	800.234	282.532	218.763	1.2915	0.632828	48785	248.274	0.765407	0.992354	0.950012	0.878746	0.005836	0.00214659	0.772195	0.997292	SEKER
48433	803.54	269.407	229.058	1.17615	0.52641	48921	248.328	0.776543	0.990025	0.942619	0.921757	0.00556247	0.00247693	0.849636	0.9993	SEKER
48484	809.471	276.062	224.336	1.23058	0.582784	49140	248.459	0.781143	0.98665	0.929835	0.90001	0.00569388	0.0023045	0.810018	0.996789	SEKER
48538	828.59	271.587	227.881	1.19179	0.544023	49197	248.597	0.747382	0.986605	0.888408	0.91535	0.00559535	0.00242301	0.837866	0.998564	SEKER
48598	813.192	301.37	206.017	1.46284	0.729855	49088	248.751	0.758538	0.990018	0.923511	0.8254	0.00620128	0.00177549	0.681285	0.99661	SEKER
48606	805.113	287.38	215.57	1.33312	0.661301	48997	248.771	0.738783	0.99202	0.942293	0.865651	0.00591245	0.00204795	0.749352	0.998976	SEKER
48611	804.782	284.498	217.95	1.30534	0.642737	49059	248.784	0.746231	0.990868	0.943166	0.874468	0.00585254	0.00211105	0.764694	0.998182	SEKER
48620	898.957	288.263	215.448	1.33797	0.664374	49827	248.807	0.723964	0.975776	0.756044	0.863125	0.0059289	0.00202978	0.744985	0.996768	SEKER
48644	835.917	323.153	192.355	1.67998	0.803544	49179	248.868	0.718183	0.989121	0.874808	0.770126	0.00664322	0.00144147	0.593094	0.996386	SEKER
48673	807.338	278.975	222.608	1.25322	0.602727	49337	248.943	0.740026	0.986542	0.938398	0.892346	0.00573162	0.00224177	0.796281	0.997912	SEKER
48673	799.093	270.691	229.292	1.18055	0.53149	49078	248.943	0.751544	0.991748	0.957863	0.919657	0.00556141	0.00245397	0.845769	0.998471	SEKER
48686	795.84	279.133	222.394	1.25513	0.604332	49041	248.976	0.795302	0.992761	0.965967	0.891962	0.00573333	0.00223858	0.795596	0.998574	SEKER
48782	811.014	274.678	226.334	1.2136	0.566595	49312	249.221	0.802415	0.989252	0.931993	0.90732	0.00563073	0.00235389	0.82323	0.999069	SEKER
48813	813.947	288.046	216.163	1.33254	0.660932	49316	249.3	0.736156	0.9898	0.925877	0.865488	0.00590101	0.00204244	0.749069	0.998165	SEKER
48868	800.747	286.917	217.16	1.32122	0.653561	49210	249.441	0.755769	0.99305	0.957732	0.869382	0.00587127	0.00206897	0.755825	0.998614	SEKER
49031	838.858	275.648	226.845	1.21514	0.568113	49761	249.856	0.779495	0.98533	0.875596	0.906433	0.00562191	0.00234103	0.821621	0.998384	SEKER
49063	795.123	271.562	230.189	1.17974	0.530561	49420	249.938	0.771431	0.992776	0.975204	0.92037	0.00553497	0.00244988	0.847081	0.999333	SEKER
49085	800.622	277.36	225.548	1.22971	0.581988	49463	249.994	0.757976	0.992358	0.962285	0.901333	0.00565061	0.00230047	0.812402	0.999022	SEKER
49092	805.611	289.556	216.112	1.33984	0.665544	49571	250.012	0.739694	0.990337	0.950539	0.863433	0.00589822	0.00202216	0.745516	0.998871	SEKER
49105	813.679	289.718	216.048	1.34099	0.666262	49553	250.045	0.763128	0.990959	0.932029	0.863062	0.00589998	0.00201929	0.744876	0.998871	SEKER
49106	908.723	297.87	210.457	1.41535	0.707672	49733	250.047	0.742343	0.987393	0.747277	0.839452	0.00606586	0.00185804	0.704679	0.997365	SEKER
49108	799.901	278.853	224.441	1.24243	0.593447	49455	250.052	0.784448	0.992984	0.964472	0.896717	0.00567837	0.00226478	0.804102	0.999042	SEKER
49129	805.088	276.173	226.851	1.21742	0.570337	49531	250.106	0.771668	0.991884	0.952491	0.905613	0.00562139	0.00233235	0.820135	0.998447	SEKER
49216	799.631	286.293	219.001	1.30727	0.644083	49540	250.327	0.760515	0.99346	0.967246	0.874375	0.00581707	0.00209737	0.764531	0.999446	SEKER
49227	807.687	289.383	216.805	1.33476	0.662346	49748	250.355	0.753017	0.989527	0.948259	0.865135	0.00587854	0.00203135	0.748458	0.999012	SEKER
49235	801.151	279.102	224.852	1.24127	0.592421	49611	250.376	0.791305	0.992421	0.963951	0.897076	0.00566877	0.00226457	0.804746	0.998904	SEKER
49335	837.331	300.585	209.239	1.43656	0.717939	49944	250.63	0.755953	0.987806	0.884241	0.833807	0.00609273	0.00181658	0.695234	0.998748	SEKER
49354	802.838	282.13	223.053	1.26486	0.612329	49750	250.678	0.782106	0.99204	0.962224	0.888519	0.00571646	0.00219773	0.789466	0.998562	SEKER
49363	816.683	280.622	224.289	1.25116	0.600987	49830	250.701	0.753507	0.990628	0.930046	0.893377	0.00568486	0.00223377	0.798122	0.998578	SEKER
49377	800.422	279.106	225.573	1.23732	0.588911	49719	250.736	0.794149	0.993121	0.968493	0.898357	0.00565254	0.00227101	0.807045	0.998574	SEKER
49452	825.529	278.331	226.914	1.22659	0.579085	50153	250.927	0.765985	0.986023	0.911862	0.901542	0.0056283	0.00229351	0.812778	0.996948	SEKER
49639	833.546	298.804	211.854	1.41042	0.7052	50048	251.401	0.734576	0.991828	0.897788	0.841358	0.00601953	0.00186065	0.707883	0.998413	SEKER
49680	819.726	278.003	227.997	1.21933	0.572184	50264	251.505	0.749253	0.988381	0.929082	0.904683	0.00559587	0.00231225	0.818452	0.99796	SEKER
49728	823.685	285.91	221.804	1.28902	0.630999	50280	251.626	0.779595	0.989021	0.921061	0.880088	0.00574948	0.00212771	0.774555	0.998416	SEKER
49753	812.08	273.558	231.988	1.17919	0.529932	50186	251.689	0.823971	0.991372	0.948051	0.920059	0.00549832	0.00243037	0.846509	0.998194	SEKER
49827	831.839	284.173	223.536	1.27126	0.617436	50442	251.876	0.781257	0.987808	0.904891	0.886349	0.00570319	0.00217129	0.785615	0.998721	SEKER
49848	805.584	270.647	234.714	1.15309	0.497903	50183	251.929	0.789934	0.993324	0.965241	0.93084	0.00542945	0.00251441	0.866464	0.999113	SEKER
49874	824.563	280.361	226.832	1.23598	0.58771	50482	251.995	0.775055	0.987956	0.921799	0.898825	0.00562138	0.0022632	0.807886	0.998534	SEKER
49878	822.009	292.003	218.017	1.33936	0.665244	50429	252.005	0.779977	0.989074	0.927611	0.863022	0.00585435	0.0020033	0.744807	0.997565	SEKER
49888	810.547	286.49	222.035	1.29029	0.631938	50224	252.031	0.764391	0.99331	0.954222	0.879719	0.00574266	0.00212162	0.773905	0.998562	SEKER
49923	816.004	271.573	234.31	1.15903	0.505566	50388	252.119	0.764822	0.990772	0.942163	0.928364	0.00543984	0.00249252	0.86186	0.998924	SEKER
49949	823.828	299.115	212.917	1.40484	0.702358	50448	252.185	0.757561	0.990109	0.924834	0.843103	0.0059884	0.00186644	0.710822	0.998593	SEKER
50086	821.776	287.944	221.927	1.29747	0.637162	50593	252.53	0.755377	0.989979	0.932007	0.877011	0.005749	0.00209793	0.769147	0.997946	SEKER
50124	827.876	291.383	219.473	1.32765	0.657777	50718	252.626	0.79285	0.988288	0.91902	0.866989	0.00581324	0.00202606	0.75167	0.997953	SEKER
50129	825.083	303.251	210.8	1.43857	0.718881	50553	252.639	0.786683	0.991613	0.925345	0.833101	0.00604941	0.00179756	0.694058	0.998453	SEKER
50170	810.208	277.115	230.794	1.2007	0.553507	50599	252.742	0.757821	0.991522	0.960419	0.912046	0.00552352	0.00235756	0.831828	0.99878	SEKER
50172	828.968	316.454	202.269	1.56452	0.769062	50547	252.747	0.68824	0.992581	0.917478	0.798685	0.00630737	0.00158318	0.637898	0.998005	SEKER
50218	822.578	284.871	224.793	1.26726	0.614263	50719	252.863	0.79782	0.990122	0.932642	0.887638	0.0056727	0.00217226	0.787901	0.998478	SEKER
50233	818.361	288.119	222.132	1.29706	0.636866	50713	252.9	0.777432	0.990535	0.94256	0.877765	0.00573565	0.00210027	0.770471	0.999348	SEKER
50253	864.971	285.97	224.165	1.27571	0.620918	51027	252.951	0.766753	0.984832	0.844051	0.884536	0.00569061	0.00214882	0.782404	0.998123	SEKER
50316	820.444	286.899	223.713	1.28244	0.626076	50767	253.109	0.773807	0.991116	0.93933	0.882224	0.00570195	0.00213068	0.778319	0.998149	SEKER
50336	819.005	295.017	217.635	1.35556	0.675124	50726	253.16	0.782222	0.992312	0.943008	0.858118	0.00586096	0.00196037	0.736367	0.998187	SEKER
50371	827.936	293.941	218.673	1.3442	0.668252	50872	253.248	0.784999	0.990152	0.923415	0.86156	0.00583551	0.00198336	0.742286	0.997784	SEKER
50459	834.999	286.901	224.464	1.27816	0.622808	51035	253.469	0.743597	0.988714	0.909445	0.883471	0.00568583	0.00213669	0.78052	0.99763	SEKER
50487	835.946	311.609	206.499	1.50902	0.748899	50978	253.539	0.713043	0.990368	0.907889	0.813644	0.00617207	0.00166858	0.662016	0.998993	SEKER
50551	828.646	291.622	221.069	1.31915	0.652177	51124	253.7	0.783591	0.988792	0.925127	0.86996	0.00576887	0.0020383	0.756831	0.99837	SEKER
50552	813.194	289.665	222.476	1.30201	0.640396	50884	253.702	0.768501	0.993475	0.960638	0.875847	0.00573004	0.00207994	0.767108	0.99878	SEKER
50645	846.485	327.398	197.811	1.65511	0.79684	51163	253.935	0.787918	0.989875	0.888194	0.775617	0.00646457	0.00144314	0.601581	0.995682	SEKER
50666	820.94	282.824	228.461	1.23795	0.589477	51147	253.988	0.773846	0.990596	0.944721	0.898042	0.00558213	0.00223958	0.806479	0.998383	SEKER
50695	832.041	302.41	213.823	1.4143	0.70715	51159	254.061	0.731572	0.99093	0.920207	0.84012	0.00596529	0.00183306	0.705801	0.998215	SEKER
50747	842.609	300.554	215.424	1.39517	0.697324	51387	254.191	0.749808	0.987545	0.89819	0.845743	0.00592259	0.00186915	0.715281	0.997941	SEKER
50760	851.459	289.511	223.917	1.29294	0.633881	51715	254.224	0.754145	0.981533	0.879841	0.878114	0.00570352	0.00209183	0.771085	0.996967	SEKER
50771	830.882	302.172	214.472	1.40891	0.704436	51286	254.251	0.742429	0.989958	0.924159	0.841413	0.00595166	0.00184016	0.707976	0.997475	SEKER
50913	828.731	294.474	220.48	1.3356	0.66288	51415	254.606	0.769044	0.990236	0.931561	0.864614	0.00578387	0.00199383	0.747558	0.99844	SEKER
51013	826.986	279.189	233.008	1.1982	0.550876	51500	254.856	0.767782	0.990544	0.937334	0.912846	0.0054729	0.00234416	0.833287	0.998442	SEKER
51026	817.975	290.311	224.033	1.29584	0.635986	51407	254.889	0.779785	0.992589	0.958344	0.877986	0.00568947	0.00208546	0.770859	0.99891	SEKER
51071	833.064	300.387	216.692	1.38624	0.692543	51633	255.001	0.774754	0.989115	0.924757	0.848909	0.00588175	0.00188422	0.720646	0.998988	SEKER
51268	828.387	294.842	222.265	1.32653	0.657054	51717	255.493	0.730126	0.991318	0.938836	0.866541	0.00575099	0.00200023	0.750893	0.996086	SEKER
51342	854.937	326.965	200.343	1.63202	0.790288	51898	255.677	0.803738	0.989287	0.882703	0.781971	0.00636837	0.00146882	0.611478	0.997947	SEKER
51408	866.227	300.842	218.057	1.37965	0.688938	52127	255.841	0.74361	0.986207	0.860948	0.850416	0.00585206	0.00188805	0.723207	0.997774	SEKER
51426	879.177	300.831	217.985	1.38006	0.689161	52169	255.886	0.740731	0.985758	0.836065	0.850596	0.00584979	0.00188892	0.723514	0.998491	SEKER
51630	826.672	296.446	222.114	1.33466	0.662279	52050	256.393	0.771403	0.991931	0.949392	0.864889	0.00574174	0.00198182	0.748033	0.998367	SEKER
51650	850.54	297.904	221.218	1.34665	0.669753	52193	256.443	0.755913	0.989596	0.897203	0.860824	0.00576774	0.00195363	0.741018	0.997891	SEKER
51737	838.558	294.547	224.105	1.31432	0.648931	52387	256.659	0.740687	0.987592	0.924581	0.871366	0.00569316	0.00202459	0.759279	0.997939	SEKER
51901	839.556	286.771	230.599	1.24359	0.594461	52463	257.065	0.757679	0.989288	0.925308	0.896413	0.00552534	0.00220075	0.803556	0.999294	SEKER
52255	840.789	315.817	211.171	1.49555	0.743577	52689	257.94	0.802639	0.991763	0.928889	0.81674	0.00604376	0.00165891	0.667065	0.997629	SEKER
52345	839.624	289.347	230.784	1.25376	0.603182	52832	258.162	0.762602	0.990782	0.933072	0.892224	0.00552769	0.00216082	0.796063	0.998069	SEKER
52371	841.309	281.556	237.238	1.18681	0.538544	52919	258.226	0.757847	0.989645	0.9298	0.91714	0.00537618	0.00234637	0.841146	0.998277	SEKER
52530	831.059	296.63	225.918	1.313	0.648029	52917	258.618	0.749572	0.992687	0.95577	0.871852	0.00564688	0.00201261	0.760127	0.998045	SEKER
52578	837.158	309.191	216.809	1.4261	0.712952	53008	258.736	0.799179	0.991888	0.942755	0.836815	0.00588062	0.00177878	0.70026	0.998641	SEKER
52737	835.521	277.797	241.959	1.14812	0.491297	53211	259.127	0.790067	0.991092	0.949315	0.932794	0.00526759	0.00245999	0.870104	0.998981	SEKER
52807	839.524	298.088	225.818	1.32004	0.652774	53201	259.299	0.768706	0.992594	0.941532	0.869873	0.00564486	0.00199369	0.756679	0.998847	SEKER
52829	846.266	298.244	226.05	1.31938	0.652331	53408	259.353	0.746805	0.989159	0.926976	0.8696	0.00564546	0.00199139	0.756204	0.997716	SEKER
53037	853.987	306.659	220.489	1.39081	0.695006	53549	259.863	0.766896	0.990439	0.913874	0.847401	0.00578198	0.00183913	0.718088	0.998725	SEKER
[truncated: 11,612 more rows]

## Sheet: Citation_Request
Citation Request : KOKLU, M. and OZKAN, I.A., (2020), “Multiclass Classification of Dry Beans Using Computer Vision and Machine Learning Techniques.” Computers and Electronics in Agriculture, 174, 105507. DOI: https://doi.org/10.1016/j.compag.2020.105507
